# Supplementary material for: Independent validation of induced overexpression efficiency across 242 experiments shows a success rate of 39%
Source: PubMed Central journal article supplement (PMC6344512; doi:10.1038/s41598-018-36122-8), 2019-01-23
Supplement: 41598_2018_36122_MOESM1_ESM.pdf [file 41598_2018_36122_MOESM1_ESM.pdf]

# **Independent validation of induced overexpression efficiency across 242 experiments shows a success rate of 39%**

Gyöngyi Munkácsy<sup>1,2\*</sup>, Péter Herman<sup>2</sup>, Balázs Gyórfy<sup>1,2</sup>

<sup>1</sup> Semmelweis University 2nd Dept. of Pediatrics, Budapest, Hungary,

<sup>2</sup> MTA TTK Lendület Cancer Biomarker Research Group, Institute of Enzymology, Budapest, Hungary

**Supplemental Table 1:** GEO datasets used in the study as well as detailed parameters and results for each gene.

| Gene symbol | Affymetrix probe set | Dataset  | PMID     | Calculated fold change | Fold change in the original study | Vector type (1=retroviral vector 2=lentiviral 3=adenoviral 4=mammalian 5=other) | cDNA origin (human=1 nonhuman=2) | Control type (1=empty/control/virus 2=untreated cells 3=GFP-expressing vector/cells 4=other) | Transduction method (1=FuGENE 2=Lipofectamine (2000) 3=calcium phosphate 4=electroporation 5=spin infection 6=other) | Drug for selection (1=puromycin, 2=G418 (Geneticin) , 3=hygromycin B 4=FACS (GFP) 5=multiple drugs 6=other) |
|-------------|----------------------|----------|----------|------------------------|-----------------------------------|---------------------------------------------------------------------------------|----------------------------------|----------------------------------------------------------------------------------------------|----------------------------------------------------------------------------------------------------------------------|-------------------------------------------------------------------------------------------------------------|
| YAP1        | 213342_at            | GSE10196 | 18413746 | 0.78                   | NA                                | 1                                                                               | 1                                | 1                                                                                            | 1                                                                                                                    | NA                                                                                                          |
| CLDN1       | 218182_s_at          | GSE10309 | 18787218 | 37.13                  | NA                                | NA                                                                              | 1                                | 1                                                                                            | NA                                                                                                                   | 2                                                                                                           |
| RUNX1       | 209360_s_at          | GSE10520 | 19043539 | 0.59                   | NA                                | NA                                                                              | 1                                | 1                                                                                            | 2                                                                                                                    | NA                                                                                                          |
| PRDM5       | 220792_at            | GSE10580 | 19169355 | 293.65                 | NA                                | 4                                                                               | 1                                | 1                                                                                            | NA                                                                                                                   | 1                                                                                                           |
| CDHR2       | 220186_s_at          | GSE10650 | 19383367 | 169.81                 | NA                                | NA                                                                              | NA                               | 3                                                                                            | NA                                                                                                                   | NA                                                                                                          |
| SOX17       | 219993_at            | GSE10809 | 18682240 | 3.45                   | NA                                | 4                                                                               | NA                               | 2                                                                                            | 4                                                                                                                    | 6                                                                                                           |
| SMARCA4     | 213720_s_at          | GSE10847 | NA       | 1.75                   | NA                                | NA                                                                              | NA                               | NA                                                                                           | NA                                                                                                                   | NA                                                                                                          |
| TGFBR2      | 208944_at            | GSE10847 | NA       | 0.44                   | NA                                | NA                                                                              | NA                               | NA                                                                                           | NA                                                                                                                   | NA                                                                                                          |
| ESR2        | 211120_x_at          | GSE11115 | 18097065 | 33.54                  | NA                                | 2                                                                               | NA                               | 2                                                                                            | NA                                                                                                                   | 1                                                                                                           |
| GLB1        | 201576_s_at          | GSE11266 | 18974123 | 1.34                   | NA                                | 3                                                                               | NA                               | 4                                                                                            | NA                                                                                                                   | NA                                                                                                          |
| SOX2        | 213721_at            | GSE11330 | 18456656 | 0.37                   | NA                                | 3                                                                               | NA                               | 4                                                                                            | NA                                                                                                                   | NA                                                                                                          |
| ITGB4       | 204990_s_at          | GSE11466 | 19011242 | 2.52                   | NA                                | 4                                                                               | NA                               | 1                                                                                            | 2                                                                                                                    | 2                                                                                                           |
| XIAP        | 206536_s_at          | GSE11618 | 19034449 | 0.33                   | NA                                | NA                                                                              | NA                               | NA                                                                                           | NA                                                                                                                   | NA                                                                                                          |
| MYC         | 202431_s_at          | GSE11791 | 18714337 | 5.45                   | 4                                 | 5                                                                               | 2                                | 1                                                                                            | NA                                                                                                                   | 1                                                                                                           |
| KLF9        | 203543_s_at          | GSE11855 | 18783612 | 91.59                  | 2.4                               | 4                                                                               | 2                                | NA                                                                                           | 2                                                                                                                    | 2                                                                                                           |
| IL6         | 205207_at            | GSE11883 | 17079474 | 0.9                    | NA                                | 5                                                                               | NA                               | 1                                                                                            | 6                                                                                                                    | 2                                                                                                           |
| SOX4        | 201417_at            | GSE11914 | 19147588 | 2.26                   | 2.8                               | 2                                                                               | NA                               | 1                                                                                            | 2                                                                                                                    | NA                                                                                                          |
| CTNNB1      | 201533_at            | GSE11916 | NA       | 1.08                   | NA                                | NA                                                                              | NA                               | 1                                                                                            | NA                                                                                                                   | NA                                                                                                          |
| PA2G4       | 214794_at            | GSE12200 | 18852121 | 0.96                   | 3                                 | 5                                                                               | NA                               | NA                                                                                           | 1                                                                                                                    | 2                                                                                                           |
| MEX3D       | 91816_f_at           | GSE12239 | NA       | 0.13                   | NA                                | NA                                                                              | NA                               | 4                                                                                            | 2                                                                                                                    | NA                                                                                                          |
| NOTCH1      | 218902_at            | GSE12355 | 19339697 | 1.03                   | NA                                | 4                                                                               | 1                                | 4                                                                                            | 4                                                                                                                    | 3                                                                                                           |
| CAT         | 201432_at            | GSE12355 | 19339697 | 0.91                   | NA                                | 4                                                                               | 2                                | NA                                                                                           | 4                                                                                                                    | 3                                                                                                           |

|         |             |          |          |         |      |    |    |    |    |    |
|---------|-------------|----------|----------|---------|------|----|----|----|----|----|
| NOTCH2  | 212377_s_at | GSE12355 | 19339697 | 0.82    | NA   | 4  | 1  | 4  | 4  | 3  |
| AGR2    | 209173_at   | GSE12513 | NA       | 4612.35 | NA   | 4  | NA | 1  | NA | NA |
| HRAS    | 212983_at   | GSE12790 | 19567590 | 21.77   | NA   | 3  | 1  | 1  | NA | NA |
| MAP2K1  | 202670_at   | GSE12790 | 19567590 | 1.26    | NA   | 3  | 1  | 1  | NA | NA |
| PRKAR2B | 203680_at   | GSE12854 | 18822129 | 32.61   | NA   | 1  | 1  | 2  | NA | NA |
| PRKAR1A | 200603_at   | GSE12854 | 18822129 | 0.89    | NA   | 1  | 1  | 2  | NA | NA |
| HLX     | 214438_at   | GSE13054 | 21224470 | 0.34    | NA   | 3  | 1  | 1  | 3  | NA |
| OLR1    | 210004_at   | GSE13139 | 19279231 | 0.96    | NA   | 3  | 1  | 3  | NA | NA |
| NR0B1   | 206645_s_at | GSE1318  | 15105423 | 2.42    | NA   | 3  | 2  | 1  | 1  | NA |
| TCFL5   | 204849_at   | GSE1318  | 15105423 | 1.36    | NA   | 3  | 2  | 1  | 1  | NA |
| MYB     | 204798_at   | GSE1318  | 15105423 | 0.97    | NA   | 3  | 2  | 1  | 2  | NA |
| MYBL1   | 213906_at   | GSE1318  | 15105423 | 0.78    | NA   | 3  | 2  | 1  | 2  | NA |
| CD9     | 201005_at   | GSE13210 | NA       | 1066.88 | NA   | 4  | NA | 4  | NA | 2  |
| YAP1    | 213342_at   | GSE13218 | NA       | 1.12    | NA   | 1  | NA | 1  | NA | NA |
| TP73    | 220804_s_at | GSE13504 | 19001418 | 136     | 21   | 3  | NA | 1  | 2  | NA |
| MKL1    | 212748_at   | GSE13710 | 19136660 | 1.03    | 10   | 2  | NA | 1  | 4  | 3  |
| BRAF    | 206044_s_at | GSE13827 | NA       | 12.81   | NA   | 2  | NA | 1  | NA | NA |
| PURA    | 204020_at   | GSE14464 | 19267365 | 1.19    | 50   | 1  | 1  | 4  | 2  | 1  |
| PURA    | 204020_at   | GSE14464 | 19267365 | 1.03    | NA   | 1  | 1  | 4  | 2  | 1  |
| SLAMF7  | 219159_s_at | GSE14680 | 19196658 | 7.92    | NA   | NA | NA | NA | NA | NA |
| MYOD1   | 206657_s_at | GSE14825 | 19299559 | 1.4     | NA   | 1  | 1  | 1  | 6  | 1  |
| ERBB2   | 216836_s_at | GSE14987 | 20133671 | 0.65    | NA   | 1  | NA | 1  | 3  | NA |
| AR      | 211110_s_at | GSE15091 | 19668381 | 268.62  | NA   | 4  | NA | 1  | 2  | NA |
| BCR     | 202315_s_at | GSE15811 | 20554971 | 25.57   | NA   | 1  | NA | 3  | NA | 4  |
| FGFR1   | 210973_s_at | GSE15811 | 20554971 | 25.57   | NA   | 1  | NA | 3  | NA | 4  |
| ZMYM2   | 202778_s_at | GSE15811 | 20554971 | 0.95    | NA   | 1  | NA | 3  | NA | 4  |
| ABL1    | 202123_s_at | GSE15811 | 20554971 | 0.93    | NA   | 1  | NA | 3  | NA | 4  |
| CXCR4   | 217028_at   | GSE15893 | 20603605 | 4.8     | 6.81 | 1  | NA | NA | NA | 2  |
| SNAI1   | 219480_at   | GSE16194 | 19887480 | 9.96    | NA   | 1  | NA | 1  | NA | 3  |

|          |             |          |          |      |     |    |    |    |    |    |
|----------|-------------|----------|----------|------|-----|----|----|----|----|----|
| NOTCH3   | 203238_s_at | GSE16254 | 23649002 | 3.33 | 170 | 4  | NA | NA | NA | NA |
| MSX1     | 205932_s_at | GSE16254 | 23649002 | 1.26 | NA  | 4  | NA | NA | NA | NA |
| JAG1     | 216268_s_at | GSE16547 | 19816565 | 1.06 | NA  | 2  | 1  | 1  | NA | NA |
| PRAME    | 204086_at   | GSE17100 | 19625708 | 1.8  | NA  | 2  | NA | 3  | 3  | 4  |
| IKBKB    | 209341_s_at | GSE17129 | 19628709 | 1.2  | NA  | 1  | NA | 1  | 4  | 6  |
| USP2     | 207213_s_at | GSE17466 | 22585994 | 7.52 | NA  | 1  | NA | 1  | 2  | 1  |
| NFIC     | 206929_s_at | GSE17636 | 20145151 | 1.06 | NA  | 4  | NA | 1  | 2  | NA |
| PIK3CA   | 204369_at   | GSE17785 | NA       | 0.65 | NA  | NA | NA | NA | NA | NA |
| MAP2K5   | 211370_s_at | GSE17939 | 20551324 | 2.43 | NA  | 1  | NA | 1  | 3  | 1  |
| MAP3K14  | 205192_at   | GSE18047 | 20053756 | 1.47 | NA  | 1  | NA | 1  | 5  | 1  |
| MAP3K14  | 205192_at   | GSE18047 | 20053756 | 1.08 | NA  | 1  | NA | 1  | 5  | 1  |
| IKBKB    | 209341_s_at | GSE18047 | 20053756 | 0.94 | NA  | 1  | NA | 1  | 5  | 1  |
| IKBKB    | 209341_s_at | GSE18047 | 20053756 | 0.92 | NA  | 1  | NA | 1  | 5  | 1  |
| SMAD7    | 204790_at   | GSE18070 | 20086175 | 0.3  | NA  | 1  | NA | 1  | 1  | 1  |
| ZBTB16   | 205883_at   | GSE18476 | 19855079 | 0.48 | NA  | 1  | NA | 1  | 1  | NA |
| RALA     | 214435_x_at | GSE19295 | NA       | 2.55 | NA  | 1  | NA | 1  | NA | NA |
| PPARGC1A | 219195_at   | GSE19643 | NA       | 0.83 | NA  | 3  | NA | NA | NA | NA |
| HSF1     | 202344_at   | GSE19797 | 20834230 | 0.42 | NA  | 4  | 1  | 2  | 3  | 6  |
| IKBKB    | 209341_s_at | GSE20115 | 20436485 | 1.39 | NA  | 4  | NA | 1  | 4  | 4  |
| KAT8     | 221820_s_at | GSE20193 | 20479123 | 1.46 | NA  | 4  | 1  | 1  | 6  | 2  |
| NOTCH1   | 218902_at   | GSE20285 | 20194747 | 1.12 | NA  | 1  | NA | 1  | 3  | NA |
| TP63     | 209863_s_at | GSE20286 | 16715076 | 0.52 | NA  | 1  | NA | 1  | 3  | NA |
| YWHAZ    | 200639_s_at | GSE20318 | 22912335 | 1.09 | NA  | 4  | NA | 4  | 2  | 6  |
| CA9      | 205199_at   | GSE20569 | 21363891 | 8.1  | NA  | 4  | 1  | 1  | 2  | 2  |
| TP53     | 201746_at   | GSE21105 | 20833636 | 0.5  | NA  | 4  | NA | 2  | 2  | 2  |
| BCL11B   | 219528_s_at | GSE21382 | 20824091 | 0.49 | 20  | 1  | 1  | 1  | NA | 4  |
| MYC      | 202431_s_at | GSE22139 | 21317922 | 6.01 | NA  | 4  | 1  | 1  | 1  | 2  |
| ESR1     | 205225_at   | GSE22593 | 20547749 | 1.39 | NA  | 4  | 1  | NA | NA | NA |
| EHMT2    | 202326_at   | GSE22810 | NA       | 2.18 | NA  | NA | NA | 1  | NA | 1  |

|        |             |          |          |        |        |    |    |    |    |    |
|--------|-------------|----------|----------|--------|--------|----|----|----|----|----|
| EHMT2  | 202326_at   | GSE22810 | NA       | 0.06   | NA     | NA | NA | 1  | NA | 1  |
| CDH3   | 203256_at   | GSE23360 | NA       | 205.96 | NA     | 1  | NA | 1  | NA | NA |
| SETD8  | 220200_s_at | GSE24170 | 20932471 | 2.16   | NA     | 1  | 1  | 1  | 2  | 1  |
| GATA3  | 209602_s_at | GSE24249 | 21892208 | 0.34   | NA     | 2  | NA | 1  | NA | 2  |
| RASSF1 | 204346_s_at | GSE24473 | 20955597 | 0.78   | NA     | NA | NA | NA | NA | NA |
| NDRG1  | 200632_s_at | GSE25086 | NA       | 0.67   | NA     | NA | NA | 1  | NA | NA |
| MAP2K5 | 211370_s_at | GSE25145 | 21166929 | 1.71   | 8.5-48 | 1  | NA | 4  | NA | 1  |
| EPCAM  | 201839_s_at | GSE25743 | NA       | 10.58  | NA     | 4  | NA | 1  | NA | 1  |
| ZBTB16 | 205883_at   | GSE26272 | 21547890 | 153.83 | NA     | 2  | NA | 1  | NA | 6  |
| WNT1   | 208570_at   | GSE26656 | 22572818 | 156.88 | NA     | 1  | NA | 1  | 2  | NA |
| WNT1   | 208570_at   | GSE26656 | 22572818 | 138.69 | NA     | 1  | NA | 1  | 2  | NA |
| CFAP45 | 220308_at   | GSE27318 | 20715168 | 43.71  | NA     | 2  | 1  | 1  | 2  | NA |
| ZNF83  | 221645_s_at | GSE27444 | 21818254 | 1.93   | NA     | 1  | NA | 2  | 1  | 5  |
| STIP1  | 213330_s_at | GSE27654 | 22884369 | 1.05   | NA     | 5  | NA | 4  | 4  | NA |
| PRDM1  | 217192_s_at | GSE27670 | 21411757 | 94.18  | NA     | 4  | NA | 1  | 4  | 4  |
| MYB    | 204798_at   | GSE2815  | 16205643 | 0.88   | NA     | 3  | 2  | 1  | NA | NA |
| MYB    | 204798_at   | GSE2816  | 16205643 | 2.23   | NA     | 3  | 2  | 1  | NA | NA |
| RUNX1  | 209360_s_at | GSE28317 | 21764752 | 1.03   | NA     | 1  | NA | 1  | 3  | NA |
| NUMB   | 207545_s_at | GSE29137 | NA       | 2.07   | NA     | 4  | NA | 1  | NA | 2  |
| NUMB   | 207545_s_at | GSE29137 | NA       | 1.09   | NA     | 4  | NA | 1  | NA | 2  |
| CYR61  | 201289_at   | GSE29384 | 22282654 | 1.34   | NA     | NA | NA | NA | NA | NA |
| SNAI2  | 213139_at   | GSE29672 | 22028892 | 1.29   | NA     | 3  | NA | 2  | NA | NA |
| RB1    | 203132_at   | GSE29783 | 23212373 | 0.74   | NA     | 2  | NA | NA | NA | NA |
| SFTPC  | 38691_s_at  | GSE2980  | 16449190 | 173.51 | NA     | 4  | 1  | 1  | 2  | 3  |
| NOTCH1 | 218902_at   | GSE29850 | 21839921 | 1.05   | NA     | 1  | NA | 1  | 3  | 2  |
| RAF1   | 201244_s_at | GSE29884 | NA       | 1.15   | NA     | 1  | NA | 2  | NA | NA |
| NOTCH1 | 218902_at   | GSE29959 | 21807868 | 1.51   | NA     | 1  | NA | 4  | 5  | NA |
| NOTCH1 | 218902_at   | GSE29959 | 21807868 | 1.24   | NA     | 1  | NA | 4  | 5  | NA |
| NOTCH1 | 218902_at   | GSE29959 | 21807868 | 1.18   | NA     | 1  | NA | 4  | 5  | NA |

|          |             |          |          |        |       |    |    |    |    |    |
|----------|-------------|----------|----------|--------|-------|----|----|----|----|----|
| NOTCH1   | 218902_at   | GSE29959 | 21807868 | 1.12   | NA    | 1  | NA | 4  | 5  | NA |
| MYC      | 202431_s_at | GSE29959 | 21807868 | 0.92   | NA    | 1  | NA | 4  | 5  | NA |
| NOTCH1   | 218902_at   | GSE29959 | 21807868 | 0.89   | NA    | 1  | NA | 4  | 5  | NA |
| MYC      | 202431_s_at | GSE29959 | 21807868 | 0.86   | NA    | 1  | NA | 4  | 5  | NA |
| MYC      | 202431_s_at | GSE29959 | 21807868 | 0.78   | NA    | 1  | NA | 4  | 5  | NA |
| MYC      | 202431_s_at | GSE29959 | 21807868 | 0.75   | NA    | 1  | NA | 4  | 5  | NA |
| MYC      | 202431_s_at | GSE29959 | 21807868 | 0.68   | NA    | 1  | NA | 4  | 5  | NA |
| BRCA1    | 204531_s_at | GSE30296 | 22685544 | 0.88   | NA    | 4  | NA | 1  | 2  | 2  |
| NEUROG3  | 207965_at   | GSE30802 | 22606327 | 22     | NA    | 3  | 2  | 1  | NA | 4  |
| FLI1     | 204236_at   | GSE31215 | 20382729 | 2.95   | NA    | 1  | 1  | 1  | 1  | 6  |
| EWSR1    | 209214_s_at | GSE31215 | 20382729 | 1.1    | NA    | 1  | 1  | 1  | 1  | 6  |
| MYC      | 202431_s_at | GSE31311 | 21913186 | 735.49 | NA    | 4  | NA | 1  | NA | NA |
| PRSS2    | 205402_x_at | GSE32056 | 22909050 | 0.41   | NA    | 5  | 1  | 1  | NA | 2  |
| CDH1     | 201131_s_at | GSE32540 | 22752307 | 1.04   | NA    | 2  | NA | 1  | NA | 4  |
| HRAS     | 212983_at   | GSE32975 | 22549044 | 10.21  | NA    | NA | NA | 1  | NA | NA |
| RELA     | 201783_s_at | GSE32975 | 22549044 | 1.02   | NA    | NA | NA | 1  | NA | NA |
| EGFR     | 201984_s_at | GSE32975 | 22549044 | 0.82   | NA    | NA | NA | 1  | NA | NA |
| FTO      | 209702_at   | GSE33870 | 22872099 | 6.35   | 8-10  | 4  | NA | 1  | 1  | 5  |
| BHLHE41  | 221530_s_at | GSE33950 | 22801492 | 0.2    | NA    | 1  | NA | 1  | 6  | 5  |
| MYC      | 202431_s_at | GSE34055 | 22157079 | 0.96   | NA    | 1  | NA | 1  | 6  | NA |
| ARHGDI1  | 201288_at   | GSE35014 | 22406535 | 3.28   | NA    | 4  | 1  | 3  | NA | 1  |
| ZNF217   | 203739_at   | GSE35511 | 22593193 | 0.82   | 2-3.5 | 4  | NA | 1  | NA | 6  |
| PPARGC1A | 219195_at   | GSE36879 | 23416000 | 0.23   | NA    | NA | NA | NA | NA | NA |
| LTF      | 202018_s_at | GSE36972 | 23069661 | 169    | NA    | 4  | NA | 1  | 2  | 2  |
| HOXA1    | 214639_s_at | GSE37136 | 23435427 | 4.27   | NA    | 2  | 1  | 1  | NA | NA |
| FOXP3    | 221334_s_at | GSE37253 | 23244505 | 1.39   | NA    | 1  | 1  | 1  | 3  | 4  |
| MITF     | 207233_s_at | GSE38007 | 23477830 | 10.83  | NA    | 4  | NA | 1  | NA | NA |
| WNT4     | 208606_s_at | GSE39949 | 23142810 | 4.39   | NA    | 3  | NA | 1  | NA | NA |
| BMP2     | 205289_at   | GSE39949 | 23142810 | 1.93   | NA    | 3  | NA | 1  | NA | NA |

|        |             |          |          |       |             |    |    |   |    |    |
|--------|-------------|----------|----------|-------|-------------|----|----|---|----|----|
| FOXO1  | 202724_s_at | GSE40543 | 24334454 | 0.37  | NA          | 1  | 1  | 1 | NA | 1  |
| MED1   | 203497_at   | GSE41150 | 23538858 | 1.07  | NA          | 4  | 1  | 1 | 2  | 2  |
| PIAS3  | 203035_s_at | GSE42979 | 23959540 | 1.04  | NA          | 1  | 2  | 1 | 1  | 2  |
| FOXC2  | 214520_at   | GSE44335 | 23378344 | 62.74 | NA          | 1  | 1  | 1 | NA | 6  |
| NFKBIA | 201502_s_at | GSE44619 | 23635779 | 7.24  | 1.4 or more | 1  | NA | 1 | 5  | 4  |
| NFKBIA | 201502_s_at | GSE44619 | 23635779 | 5.73  | 1.4 or more | 1  | NA | 1 | 5  | 4  |
| NFKBIA | 201502_s_at | GSE44619 | 23635779 | 4.1   | 1.4 or more | 1  | NA | 1 | 5  | 4  |
| NFKBIA | 201502_s_at | GSE44619 | 23635779 | 1.55  | 1.4 or more | 1  | NA | 1 | 5  | 4  |
| IKBKB  | 209341_s_at | GSE44619 | 23635779 | 1.09  | 1.4 or more | 1  | NA | 1 | 5  | 4  |
| IKBKB  | 209341_s_at | GSE44619 | 23635779 | 0.87  | 1.4 or more | 1  | NA | 1 | 5  | 4  |
| IKBKB  | 209341_s_at | GSE44619 | 23635779 | 0.84  | 1.4 or more | 1  | NA | 1 | 5  | 4  |
| IKBKB  | 209341_s_at | GSE44619 | 23635779 | 0.77  | 1.4 or more | 1  | NA | 1 | 5  | 4  |
| NFKBIA | 201502_s_at | GSE44619 | 23635779 | 0.77  | 1.4 or more | 1  | NA | 1 | 5  | 4  |
| IKBKB  | 209341_s_at | GSE44619 | 23635779 | 0.76  | 1.4 or more | 1  | NA | 1 | 5  | 4  |
| GRHL2  | 219388_at   | GSE44807 | 23690579 | 0.3   | NA          | 2  | NA | 3 | 1  | 1  |
| GRHL2  | 219388_at   | GSE44808 | 23690579 | 0.63  | NA          | 2  | NA | 3 | 1  | 1  |
| AR     | 211110_s_at | GSE44924 | 23842682 | 0.98  | NA          | 2  | NA | 1 | NA | 6  |
| HRAS   | 212983_at   | GSE45276 | 21474066 | 4.5   | NA          | 1  | NA | 1 | NA | 5  |
| AKT1   | 207163_s_at | GSE45276 | 21474066 | 0.71  | NA          | 1  | NA | 1 | NA | 5  |
| SOX2   | 213721_at   | GSE45391 | NA       | 16.17 | NA          | 2  | NA | 1 | NA | 1  |
| DLC1   | 210762_s_at | GSE46214 | 24590291 | 0.93  | NA          | NA | 1  | 2 | 2  | NA |
| HOXD13 | 207397_s_at | GSE46542 | NA       | 29.34 | NA          | 4  | NA | 1 | NA | 2  |
| HOXD9  | 205604_at   | GSE46542 | NA       | 1.53  | NA          | 4  | NA | 1 | NA | 2  |
| PEBP1  | 210825_s_at | GSE47378 | 23975428 | 0.91  | NA          | 2  | NA | 1 | 6  | 1  |

|         |             |          |          |        |    |    |    |    |    |    |
|---------|-------------|----------|----------|--------|----|----|----|----|----|----|
| RAD21   | 200608_s_at | GSE47641 | 23955599 | 0.87   | NA | 1  | NA | 4  | NA | 4  |
| TAL1    | 206283_s_at | GSE48557 | 23836559 | 1.14   | NA | 1  | 1  | 1  | NA | 2  |
| FGF18   | 211485_s_at | GSE48567 | 24018557 | 786.95 | NA | 2  | 1  | 4  | 2  | 6  |
| ELK1    | 203617_x_at | GSE48792 | 23871667 | 0.92   | NA | 5  | NA | NA | 6  | 2  |
| RCAN1   | 208370_s_at | GSE48841 | 23954784 | 1.01   | NA | 3  | 1  | 4  | NA | NA |
| PML     | 211012_s_at | GSE48842 | NA       | 2.02   | NA | 1  | NA | 1  | NA | 2  |
| TAGLN   | 205547_s_at | GSE48998 | 26847345 | 6.89   | NA | 4  | NA | 1  | 2  | 6  |
| E2F1    | 204947_at   | GSE50051 | 24244455 | 1.56   | NA | 3  | NA | 3  | NA | NA |
| WHSC1   | 209054_s_at | GSE50072 | NA       | 0.96   | NA | NA | NA | NA | NA | NA |
| HSPA4   | 208815_x_at | GSE50547 | NA       | 1.28   | NA | NA | NA | 1  | NA | NA |
| HOXA5   | 213844_at   | GSE50659 | 25875824 | 1.31   | NA | NA | NA | 4  | NA | NA |
| BAG1    | 202387_at   | GSE51524 | 24523409 | 1.14   | NA | 1  | NA | 1  | 1  | 2  |
| IRF5    | 205469_s_at | GSE51717 | 25288773 | 2.8    | NA | 1  | 1  | 1  | 4  | 4  |
| IKBKB   | 209341_s_at | GSE51717 | 25288773 | 1.06   | NA | 1  | 1  | 1  | 4  | 4  |
| RNF2    | 205215_at   | GSE51928 | 26450788 | 1.28   | NA | 2  | NA | 3  | 4  | 2  |
| YWHAZ   | 200639_s_at | GSE52032 | 25670079 | 0.67   | NA | 2  | NA | 1  | 4  | 6  |
| IGF1R   | 203628_at   | GSE5225  | 16611727 | 1.39   | NA | NA | NA | 2  | 2  | NA |
| NFKB1   | 209239_at   | GSE52707 | 24319068 | 1.29   | NA | 1  | NA | 1  | 2  | 1  |
| H2AFY   | 207168_s_at | GSE53103 | 25959814 | 1      | NA | 2  | NA | 1  | NA | 4  |
| H2AFY   | 207168_s_at | GSE53103 | 25959814 | 0.93   | NA | 2  | NA | 1  | NA | 4  |
| ZFP36   | 201531_at   | GSE53183 | 24401661 | 4.16   | NA | 4  | 1  | 1  | NA | NA |
| PRDM1   | 217192_s_at | GSE53283 | 24527393 | 4.69   | NA | NA | NA | 3  | NA | NA |
| PNP     | 201695_s_at | GSE53604 | 24729470 | 0.99   | NA | 2  | NA | NA | 2  | 1  |
| ZC3HAV1 | 220104_at   | GSE54342 | 25288727 | 2      | NA | 4  | NA | 3  | 1  | NA |
| SNAI2   | 213139_at   | GSE55269 | 25100569 | 0.53   | NA | 1  | NA | 4  | 1  | 1  |
| CDH1    | 201131_s_at | GSE55529 | NA       | 1.49   | NA | NA | NA | 3  | NA | NA |
| CDH1    | 201131_s_at | GSE55529 | NA       | 0.99   | NA | NA | NA | 3  | NA | NA |
| ZEB1    | 212764_at   | GSE55688 | 28394329 | 705    | NA | 1  | 1  | 1  | 3  | 5  |
| HRAS    | 212983_at   | GSE55688 | 28394329 | 1.6    | NA | 1  | 1  | 1  | 3  | 5  |



|        |             |          |          |        |     |    |    |    |    |    |
|--------|-------------|----------|----------|--------|-----|----|----|----|----|----|
| ERCC6  | 207347_at   | GSE56049 | 22483866 | 1.86   | NA  | 4  | NA | 1  | 6  | 5  |
| RECK   | 205407_at   | GSE56898 | 24931164 | 0.88   | NA  | 2  | NA | 1  | 1  | 1  |
| RECK   | 205407_at   | GSE56898 | 24931164 | 0.69   | NA  | 2  | NA | 1  | 1  | 1  |
| KDM8   | 220070_at   | GSE56908 | NA       | 0.83   | NA  | NA | NA | 1  | NA | NA |
| NUP98  | 203195_s_at | GSE57194 | 20805992 | 1.02   | NA  | 1  | NA | 1  | 4  | NA |
| RUNX1  | 209360_s_at | GSE57194 | 20805992 | 0.98   | NA  | 1  | NA | 1  | 4  | NA |
| PML    | 211012_s_at | GSE57194 | 20805992 | 0.97   | NA  | 1  | NA | 1  | 4  | NA |
| SDCBP  | 200958_s_at | GSE57760 | 25593999 | 0.61   | NA  | 4  | NA | 1  | 1  | 2  |
| ARL2BP | 202092_s_at | GSE58224 | 25012295 | 0.98   | NA  | 2  | 2  | 1  | 2  | NA |
| ARL2BP | 202092_s_at | GSE58224 | 25012295 | 0.87   | NA  | 2  | 2  | 1  | 2  | NA |
| NR4A2  | 216248_s_at | GSE58475 | NA       | 76.84  | NA  | 1  | NA | 1  | NA | NA |
| MECOM  | 221884_at   | GSE60100 | 25886616 | 521.37 | NA  | 1  | 1  | 1  | 4  | 4  |
| BCL3   | 204908_s_at | GSE60551 | 25366117 | 0.13   | NA  | 2  | 1  | 4  | 6  | NA |
| FGFR3  | 204379_s_at | GSE61352 | 25223521 | 0.91   | NA  | 1  | NA | 1  | 6  | 3  |
| YAP1   | 213342_at   | GSE61764 | 26173433 | 1.02   | NA  | 2  | 1  | 1  | NA | NA |
| CD99   | 201029_s_at | GSE61928 | 26123714 | 1.03   | NA  | NA | NA | 2  | 3  | 6  |
| CD44   | 212063_at   | GSE63862 | 25762343 | 52.06  | NA  | 4  | 1  | 2  | 6  | NA |
| CAT    | 201432_at   | GSE63955 | NA       | 1.13   | NA  | NA | NA | 4  | NA | NA |
| DPP3   | 218567_x_at | GSE6451  | 17360324 | 8.09   | NA  | 4  | 1  | 1  | 1  | NA |
| ID3    | 207826_s_at | GSE64535 | 25693514 | 3.43   | 7-8 | 1  | NA | 1  | 2  | 6  |
| TP53   | 201746_at   | GSE64738 | NA       | 1.02   | NA  | NA | NA | 1  | NA | NA |
| TP53   | 201746_at   | GSE64738 | NA       | 1      | NA  | NA | NA | 1  | NA | NA |
| CDH13  | 204726_at   | GSE65363 | NA       | 1.08   | NA  | NA | NA | NA | NA | NA |
| HRAS   | 212983_at   | GSE6559  | 17440097 | 8.05   | NA  | 1  | NA | 1  | 1  | 1  |
| MAP2K7 | 209952_s_at | GSE6559  | 17440097 | 7.75   | NA  | 1  | NA | 1  | 1  | 1  |
| JUN    | 201466_s_at | GSE6559  | 17440097 | 4.1    | NA  | 1  | NA | 1  | 1  | 1  |
| KEAP1  | 202417_at   | GSE66473 | 26078391 | 0.99   | NA  | 4  | NA | 1  | NA | 2  |
| MTDH   | 212248_at   | GSE67249 | NA       | 1.14   | NA  | NA | NA | 1  | NA | NA |
| MFI2   | 220043_s_at | GSE6816  | 17449903 | 235    | 18  | 4  | 1  | 1  | 2  | 2  |

|        |             |          |          |         |    |    |    |    |    |    |
|--------|-------------|----------|----------|---------|----|----|----|----|----|----|
| YAP1   | 213342_at   | GSE69655 | 26173433 | 1.55    | NA | 2  | NA | 1  | NA | NA |
| TCF12  | 208986_at   | GSE70186 | 27221705 | 1.19    | NA | 1  | NA | 1  | NA | 1  |
| RBM14  | 204178_s_at | GSE70540 | NA       | 0.93    | NA | 2  | NA | 1  | NA | 4  |
| RBM14  | 204178_s_at | GSE70540 | NA       | 0.82    | NA | 2  | NA | 1  | NA | 4  |
| SMC1A  | 217555_at   | GSE73224 | 26607380 | 1.26    | NA | 2  | NA | 1  | NA | 4  |
| LDB1   | 203451_at   | GSE7382  | 17452977 | 1.28    | NA | 1  | NA | 1  | 3  | NA |
| LMO4   | 209205_s_at | GSE7382  | 17452977 | 1.17    | NA | 1  | NA | 1  | 3  | NA |
| HOXA5  | 213844_at   | GSE74862 | 26678341 | 23.15   | NA | 2  | NA | 1  | NA | 4  |
| DKK1   | 204602_at   | GSE8066  | 17643814 | 0.95    | NA | 4  | NA | 1  | NA | NA |
| REPIN1 | 219041_s_at | GSE83140 | NA       | 0.9     | NA | 3  | NA | 1  | NA | NA |
| KHSRP  | 204372_s_at | GSE83388 | NA       | 1.08    | NA | NA | NA | 1  | NA | 5  |
| NCOR2  | 207760_s_at | GSE8346  | NA       | 1       | NA | 1  | NA | 1  | NA | NA |
| XBP1   | 200670_at   | GSE8562  | 17660348 | 0.86    | NA | 4  | 1  | 1  | 1  | 2  |
| TP53   | 201746_at   | GSE8660  | 18267967 | 0.83    | NA | 3  | 1  | 3  | 6  | NA |
| TGFBR1 | 206943_at   | GSE9093  | 18316594 | 2.49    | NA | 1  | NA | 1  | 1  | 1  |
| HOXC6  | 206858_s_at | GSE9182  | NA       | 120.41  | NA | NA | NA | 1  | NA | NA |
| PAX9   | 207059_at   | GSE9212  | 19279207 | 2.77    | NA | 1  | NA | NA | NA | 5  |
| TTF1   | 204772_s_at | GSE9212  | 19279207 | 1.21    | NA | 1  | NA | NA | NA | 5  |
| NKX2-8 | 207451_at   | GSE9212  | 19279207 | 1.04    | NA | 1  | NA | NA | NA | 5  |
| MSX1   | 205932_s_at | GSE9339  | 18201699 | 0.68    | NA | 4  | NA | NA | 2  | 5  |
| HIC1   | 208461_at   | GSE9854  | NA       | 1960.12 | NA | 3  | NA | NA | NA | NA |
| ESR2   | 211120_x_at | GSE9936  | 18258689 | 966.77  | 10 | 3  | NA | 1  | NA | NA |

**Supplemental Figure 1:** The heat map of **Figure 2** at full resolution.

| gene    | AffyID      | GSE      | line     | 209173_at | 208461_at | 201005_at | 211120_x_at | 211485_s_at | 202431_s_at | 212764_at |
|---------|-------------|----------|----------|-----------|-----------|-----------|-------------|-------------|-------------|-----------|
| AGR2    | 209173_at   | GSE12513 | MIAPACA2 | 4612.35   | 0.43      | 1.95      | 1.9         | 0.81        | 1.04        | 1.08      |
| HIC1    | 208461_at   | GSE9854  | U2OS     | 0.71      | 1960.12   | 1.03      | 2.78        | 0.81        | 0.41        | 1.43      |
| CD9     | 201005_at   | GSE13210 | RAJI     | 0.96      | 0.98      | 1066.88   | 1.92        | 0.34        | 1.13        | 6.18      |
| ESR2    | 211120_x_at | GSE9936  | MCF7     | 1.07      | 3.47      | 1.12      | 966.77      | 2.67        | 1.17        | 3         |
| FGF18   | 211485_s_at | GSE48567 | A224     | 1.03      | 1.5       | 3.11      | 0.83        | 786.95      | 1.22        | 1.07      |
| MYC     | 202431_s_at | GSE31311 | B cells  | 1.36      | 1.72      | 1.62      | 0.93        | 1.14        | 735.49      | 1.27      |
| ZEB1    | 212764_at   | GSE55688 | HMEC     | 0.36      | 1.5       | 0.62      | 0.93        | 1.5         | 0.85        | 705       |
| MECOM   | 221884_at   | GSE60100 | U937     | 0.33      | 1.97      | 0.87      | 0.62        | 0.69        | 1.08        | 0.67      |
| PRDM5   | 220792_at   | GSE10580 | U2OS     | 0.33      | 3.27      | 0.87      | 1.49        | 2.11        | 0.82        | 1.01      |
| AR      | 211110_s_at | GSE15091 | PC3      | 0.88      | 1.17      | 0.74      | 6.09        | 2.53        | 1.95        | 1.49      |
| MFI2    | 220043_s_at | GSE6816  | SKNMC    | 1         | 0.33      | 0.86      | 0.76        | 0.05        | 0.89        | 1.05      |
| CDH3    | 203256_at   | GSE23360 | BLM      | 0.73      | 2.93      | 1.09      | 1.4         | 1.1         | 0.97        | 1.06      |
| SFTPC   | 38691_s_at  | GSE2980  | HEK293   | 1.43      | 0.53      | 1.33      | 1.19        | 2.09        | 1.03        | 0.93      |
| CDHR2   | 220186_s_at | GSE10650 | HCT116   | 290.24    | 63.56     | 0.12      | 58.07       | 5.49        | 0.15        | 0.44      |
| LTF     | 202018_s_at | GSE36972 | 58F      | 0.97      | 1.14      | 0.99      | 0.38        | 1.46        | 1.71        | 1.36      |
| WNT1    | 208570_at   | GSE26656 | A375     | 1.83      | 4.34      | 0.89      | 10.1        | 1.68        | 0.92        | 1.4       |
| ZBTB16  | 205883_at   | GSE26272 | MSC      | 1.03      | 1.27      | 0.93      | 2.05        | 1.61        | 0.83        | 1.01      |
| WNT1    | 208570_at   | GSE26656 | M24      | 2.98      | 4.14      | 0.73      | 3.36        | 3.41        | 0.74        | 1.83      |
| TP73    | 220804_s_at | GSE13504 | SAOS2    | 1.2       | 0.21      | 2.76      | 1           | 1.5         | 0.22        | 0.65      |
| HOXC6   | 206858_s_at | GSE9182  | LNCAP    | 1.36      | 16.06     | 0.25      | 1.58        | 1.57        | 0.74        | 5.88      |
| PRDM1   | 217192_s_at | GSE27670 | B cells  | 0.98      | 2.25      | 0.17      | 9.56        | 2.27        | 0.49        | 0.71      |
| KLF9    | 203543_s_at | GSE11855 | HEC1A    | 6.75      | 2.5       | 0.73      | 50.44       | 0.03        | 0.88        | 1.76      |
| NR4A2   | 216248_s_at | GSE58475 | HB1      | 1.17      | 0.49      | 1.34      | 0.85        | 1.76        | 1.41        | 0.87      |
| FOXC2   | 214520_at   | GSE44335 | HMLER    | 1.2       | 1.33      | 0.73      | 1.27        | 2.58        | 0.75        | 227.91    |
| CD44    | 212063_at   | GSE63862 | HEK293   | 1.56      | 1.83      | 3.26      | 1.23        | 2.16        | 6.79        | 0.82      |
| CFAP45  | 220308_at   | GSE27318 | NPC58F   | 0.67      | 1.43      | 1.3       | 0.72        | 1.02        | 0.76        | 0.19      |
| CLDN1   | 218182_s_at | GSE10309 | CL15     | 15.19     | 0.33      | 1.05      | 2.05        | 1.47        | 0.76        | 0.45      |
| ESR2    | 211120_x_at | GSE11115 | U2OS     | 0.33      | 2         | 0.82      | 33.54       | 0.98        | 1.03        | 1.1       |
| PRKAR2B | 203680_at   | GSE12854 | OVCAR8   | 85.24     | 0.67      | 0.88      | 1.73        | 2.1         | 3.43        | 0.99      |
| HOXD13  | 207397_s_at | GSE46542 | HEK293   | 1.53      | 1.53      | 1         | 2.41        | 2.13        | 3.16        | 1.42      |

|         |             |          |                |         |      |       |      |       |        |       |
|---------|-------------|----------|----------------|---------|------|-------|------|-------|--------|-------|
| FGFR1   | 210973_s_at | GSE15811 | CD34+ cells    | 1.21    | 1.57 | 1.22  | 0.73 | 0.91  | 1.37   | 0.71  |
| HOXA5   | 213844_at   | GSE74862 | SW480          | 14.18   | 0.57 | 31.43 | 5.13 | 4.3   | 4.73   | 10.25 |
| NEUROG3 | 207965_at   | GSE30802 | duct cells poo | 0.79    | 0.84 | 0.91  | 1.04 | 2.43  | 0.71   | 1.36  |
| HRAS    | 212983_at   | GSE12790 | MCF10A         | 1.57    | 4.12 | 0.5   | 1.56 | 4.8   | 0.55   | 0.88  |
| SOX2    | 213721_at   | GSE45391 | MKN28          | 1.33    | 1.93 | 0.2   | 0.2  | 0.63  | 1.69   | 0.7   |
| BRAF    | 206044_s_at | GSE13827 | melanocytes    | 1.25    | 2.8  | 0.74  | 1.11 | 8.7   | 1.53   | 10.98 |
| MITF    | 207233_s_at | GSE38007 | mammary epi    | 1.98    | 4.64 | 2.11  | 1.41 | 1     | 0.97   | 6.31  |
| EPCAM   | 201839_s_at | GSE25743 | HS578T         | 0.33    | 0.5  | 0.99  | 6.6  | 0.17  | 1.17   | 0.74  |
| HRAS    | 212983_at   | GSE32975 | HACAT          | 1332.02 | 1.39 | 0.96  | 3.13 | 4.26  | 0.55   | 1.15  |
| SNAI1   | 219480_at   | GSE16194 | NCIH1437       | 0.02    | 0.67 | 0.58  | 1.27 | 0.56  | 0.48   | 54.75 |
| CA9     | 205199_at   | GSE20569 | C33A           | 0.75    | 3.25 | 1.08  | 1.35 | 1.51  | 0.71   | 0.82  |
| DPP3    | 218567_x_at | GSE6451  | IMR32          | 0.67    | 3.75 | 1.16  | 1.23 | 1.97  | 0.47   | 1.1   |
| HRAS    | 212983_at   | GSE6559  | keratinocytes  | 2.15    | 0.75 | 0.9   | 0.22 | 0.74  | 0.44   | 3.88  |
| SLAMF7  | 219159_s_at | GSE14680 | U266           | 1.31    | 0.53 | 1.46  | 2.55 | 2.06  | 2.84   | 1.57  |
| MAP2K7  | 209952_s_at | GSE6559  | keratinocytes  | 2.27    | 1    | 0.88  | 0.22 | 1.04  | 0.6    | 2.67  |
| USP2    | 207213_s_at | GSE17466 | IPREC          | 23.09   | 2.77 | 1.37  | 3.12 | 1.41  | 1.23   | 7     |
| NFKBIA  | 201502_s_at | GSE44619 | HCC827         | 1.52    | 1    | 1.09  | 1.9  | 2     | 0.86   | 7.33  |
| TAGLN   | 205547_s_at | GSE48998 | RKO            | 0.82    | 5.83 | 1.08  | 1.46 | 1.08  | 1.38   | 0.78  |
| FTO     | 209702_at   | GSE33870 | HEK293         | 1.05    | 0.67 | 0.97  | 3.19 | 0.62  | 0.9    | 1.02  |
| MYC     | 202431_s_at | GSE22139 | DAOY           | 2.08    | 2.44 | 2.07  | 1.22 | 4.94  | 6.01   | 2.06  |
| NFKBIA  | 201502_s_at | GSE44619 | PC9            | 0.77    | 2    | 1.02  | 0.29 | 0.72  | 0.74   | 0.87  |
| MYC     | 202431_s_at | GSE11791 | MCF7           | 0.72    | 2.22 | 0.83  | 4.75 | 2.39  | 5.45   | 8.5   |
| CXCR4   | 217028_at   | GSE15893 | MDAMB231       | 0.33    | 0.68 | 0.84  | 5.99 | 1.56  | 1.2    | 1     |
| PRDM1   | 217192_s_at | GSE53283 | H9             | 1.65    | 2.31 | 0.78  | 2.04 | 12.14 | 0.64   | 3.1   |
| HRAS    | 212983_at   | GSE45276 | IMR90          | 11.01   | 0.53 | 2.36  | 3.73 | 1.45  | 1.96   | 0.86  |
| WNT4    | 208606_s_at | GSE39949 | endometrial s  | 0.4     | 2.76 | 1.32  | 1    | 0.5   | 0.62   | 0.83  |
| HOXA1   | 214639_s_at | GSE37136 | WM115          | 0.78    | 0.71 | 2.13  | 1.89 | 29.66 | 0.59   | 0.78  |
| ZFP36   | 201531_at   | GSE53183 | HEK293         | 1.18    | 1.13 | 1.37  | 0.9  | 1.81  | 0.5    | 1.45  |
| NFKBIA  | 201502_s_at | GSE44619 | H358           | 1.09    | 1    | 1.1   | 1.88 | 1.4   | 0.82   | 0.91  |
| JUN     | 201466_s_at | GSE6559  | keratinocytes  | 1.34    | 0.62 | 0.82  | 0.3  | 1.17  | 0.46   | 3.45  |
| SOX17   | 219993_at   | GSE10809 | CA2            | 0.87    | 1.31 | 0.69  | 0.16 | 1.04  | 0.67   | 1.8   |
| ID3     | 207826_s_at | GSE64535 | A431           | 1.04    | 1.25 | 1.8   | 0.31 | 2.77  | 1.04   | 3.01  |
| NOTCH3  | 203238_s_at | GSE16254 | IMR32          | 3.03    | 2    | 1.48  | 0.73 | 1.01  | 142.34 | 0.8   |

|          |             |          |                |        |       |      |      |       |       |       |
|----------|-------------|----------|----------------|--------|-------|------|------|-------|-------|-------|
| ARHGDI1B | 201288_at   | GSE35014 | UMUC3          | 0.92   | 0.42  | 1.22 | 0.75 | 0.94  | 0.91  | 1.17  |
| FLI1     | 204236_at   | GSE31215 | MSC            | 1.32   | 1.75  | 0.85 | 2.1  | 4.9   | 1.85  | 0.65  |
| IRF5     | 205469_s_at | GSE51717 | REH            | 0.53   | 1.25  | 1.08 | 0.83 | 0.84  | 1     | 1.62  |
| PAX9     | 207059_at   | GSE9212  | BEAS2B         | 127.64 | 1.21  | 1.3  | 3.25 | 2.15  | 1.37  | 5.1   |
| RALA     | 214435_x_at | GSE19295 | HEKHT          | 4.36   | 1.12  | 0.85 | 1.91 | 1.53  | 1.04  | 1.37  |
| ITGB4    | 204990_s_at | GSE11466 | MDAMB435       | 0.53   | 6.21  | 1.02 | 4.6  | 0.48  | 1.04  | 1.76  |
| TGFBR1   | 206943_at   | GSE9093  | MCF7           | 0.18   | 0.78  | 0.74 | 1.64 | 2.38  | 1.83  | 0.9   |
| MAP2K5   | 211370_s_at | GSE17939 | HUVEC          | 1.44   | 0.5   | 1.18 | 1.94 | 6.75  | 1.1   | 0.99  |
| NROB1    | 206645_s_at | GSE1318  | MCF7           | 0.55   | 0.71  | 0.8  | 1.16 | 1.96  | 1.08  | 2.25  |
| SOX4     | 201417_at   | GSE11914 | LNCAP          | 0.69   | 1.76  | 0.71 | 1.49 | 1.48  | 0.8   | 1.93  |
| MYB      | 204798_at   | GSE2816  | monocytes      | 2.93   | 1.94  | 2.19 | 5.33 | 0.44  | 2.8   | 0.81  |
| EHMT2    | 202326_at   | GSE22810 | CL10           | 1.84   | 0.17  | 1.09 | 1.21 | 1.17  | 0.74  | 1.01  |
| SETD8    | 220200_s_at | GSE24170 | U2OS           | 4.25   | 2.25  | 0.87 | 1.3  | 3.5   | 1.33  | 1.4   |
| NUMB     | 207545_s_at | GSE29137 | MDAMB231       | 70.62  | 1.36  | 2.9  | 0.78 | 0.29  | 2     | 1.49  |
| PML      | 211012_s_at | GSE48842 | K562           | 1.67   | 1     | 0.54 | 0.14 | 2.57  | 1     | 0.8   |
| ZC3HAV1  | 220104_at   | GSE54342 | L02            | 0.09   | 0.06  | 43.1 | 0.05 | 0.1   | 52.03 | 15.91 |
| ZNF83    | 221645_s_at | GSE27444 | MCF7RES        | 1.58   | 1.06  | 1.59 | 0.63 | 0.32  | 0.53  | 0.71  |
| BMP2     | 205289_at   | GSE39949 | endometrial s  | 0.6    | 0.03  | 0.67 | 0.29 | 0.4   | 0.13  | 0.85  |
| ERCC6    | 207347_at   | GSE56049 | UVSS1KO        | 1.67   | 3.77  | 0.58 | 1.78 | 2.76  | 1.22  | 1.85  |
| PRAME    | 204086_at   | GSE17100 | CD34+ cells    | 2.77   | 10.36 | 1.36 | 3.14 | 2.38  | 1.02  | 1.47  |
| SMARCA4  | 213720_s_at | GSE10847 | NCIH522        | 398.85 | 0.66  | 2.96 | 0.95 | 10.41 | 0.33  | 0.24  |
| MAP2K5   | 211370_s_at | GSE25145 | endothelial ce | 1.4    | 1.44  | 1.18 | 1.85 | 1.15  | 1.17  | 1.26  |
| HRAS     | 212983_at   | GSE55688 | HMEC           | 0.55   | 1.5   | 0.82 | 0.7  | 1.75  | 0.87  | 358.5 |
| E2F1     | 204947_at   | GSE50051 | mammary epi    | 2.62   | 0.48  | 1.03 | 1.19 | 6.19  | 0.51  | 1.48  |
| YAP1     | 213342_at   | GSE69655 | HUCCT1         | 0.69   | 1.26  | 1.27 | 0.71 | 1.41  | 1.04  | 0.43  |
| NFKBIA   | 201502_s_at | GSE44619 | A549           | 1.06   | 1     | 1.09 | 0.35 | 3.71  | 1.07  | 0.87  |
| HOXD9    | 205604_at   | GSE46542 | HEK293         | 1.22   | 0.78  | 1.01 | 3.03 | 1.64  | 1.28  | 0.76  |
| NOTCH1   | 218902_at   | GSE29959 | TALL1          | 0.27   | 0.68  | 2.1  | 2.89 | 0.39  | 1.31  | 0.95  |
| CDH1     | 201131_s_at | GSE55529 | MDAMB134       | 0.95   | 0.69  | 1.11 | 2.05 | 1.22  | 1.07  | 1.61  |
| MAP3K14  | 205192_at   | GSE18047 | NCIH929        | 1.25   | 1.67  | 1.32 | 0.38 | 1.11  | 1.03  | 0.89  |
| KAT8     | 221820_s_at | GSE20193 | HEK293         | 0.2    | 3.33  | 1.22 | 0.77 | 3.78  | 0.83  | 0.97  |
| MYOD1    | 206657_s_at | GSE14825 | RD             | 0.86   | 0.09  | 5.24 | 1.21 | 2.02  | 0.62  | 1.33  |
| IKKBK    | 209341_s_at | GSE20115 | REH            | 0.07   | 3     | 0.86 | 0.9  | 1.53  | 0.77  | 1.23  |

|        |             |          |              |       |      |      |      |      |      |       |
|--------|-------------|----------|--------------|-------|------|------|------|------|------|-------|
| ESR1   | 205225_at   | GSE22593 | MDAMB231     | 1.85  | 1.32 | 0.41 | 1.22 | 2.07 | 2.26 | 1.13  |
| FOXP3  | 221334_s_at | GSE37253 | JURKAT       | 1.34  | 0.7  | 0.23 | 5.85 | 0.18 | 0.92 | 0.9   |
| IGF1R  | 203628_at   | GSE5225  | OCUBM        | 2.59  | 0.79 | 0.86 | 0.97 | 1.47 | 1.59 | 1.74  |
| TCFL5  | 204849_at   | GSE1318  | MCF7         | 0.78  | 0.52 | 0.78 | 0.38 | 1.65 | 0.6  | 0.22  |
| ITGB5  | 201124_at   | GSE11466 | MDAMB435     | 1.58  | 0.67 | 1.18 | 1.07 | 0.52 | 1.17 | 1.57  |
| GLB1   | 201576_s_at | GSE11266 | MCF7         | 3.36  | 1.98 | 0.92 | 2.29 | 4.53 | 0.62 | 1.72  |
| CYR61  | 201289_at   | GSE29384 | LN229        | 1.19  | 1.5  | 0.82 | 1.86 | 5.06 | 1.52 | 1.15  |
| HOXA5  | 213844_at   | GSE50659 | CL15         | 7.46  | 0.06 | 0.85 | 0.84 | 1.8  | 0.71 | 1.18  |
| SNAI2  | 213139_at   | GSE29672 | MCF7         | 0.45  | 4.52 | 0.54 | 1.73 | 2.12 | 1.65 | 8.41  |
| NFKB1  | 209239_at   | GSE52707 | SKR6         | 1     | 1.06 | 1.08 | 0.51 | 2.4  | 1.39 | 1.63  |
| HSPA4  | 208815_x_at | GSE50547 | HEK293       | 0.39  | 0.82 | 0.96 | 0.56 | 3.3  | 0.65 | 0.96  |
| LDB1   | 203451_at   | GSE7382  | MCF7         | 1.4   | 0.95 | 0.98 | 0.57 | 2.83 | 1.26 | 9.57  |
| RNF2   | 205215_at   | GSE51928 | HMELBRA6     | 1.25  | 0.92 | 0.96 | 1.88 | 0.85 | 1.03 | 1.26  |
| MAP2K1 | 202670_at   | GSE12790 | MCF10A       | 1.05  | 1.94 | 0.7  | 0.74 | 2.38 | 0.84 | 0.99  |
| MSX1   | 205932_s_at | GSE16254 | IMR32        | 1.05  | 0.78 | 1.1  | 1    | 1.69 | 2.56 | 1.05  |
| SMC1A  | 217555_at   | GSE73224 | CD34+ cells  | 1.85  | 1.35 | 1.51 | 4.5  | 2.93 | 1.01 | 2.63  |
| NOTCH1 | 218902_at   | GSE29959 | HPBALL       | 0.65  | 3    | 0.88 | 0.79 | 0.73 | 1.32 | 0.96  |
| TTF1   | 204772_s_at | GSE9212  | BEAS2B       | 90.85 | 1.01 | 1.29 | 2.35 | 0.97 | 1.75 | 3.39  |
| IKBKB  | 209341_s_at | GSE17129 | RAMOS        | 0.75  | 3.33 | 0.87 | 1.15 | 4.08 | 0.97 | 0.87  |
| PURA   | 204020_at   | GSE14464 | PC3          | 1.51  | 3    | 0.99 | 1.65 | 0.52 | 0.81 | 2.31  |
| TCF12  | 208986_at   | GSE70186 | HSC3         | 2.17  | 1    | 0.67 | 1.09 | 0.17 | 0.85 | 6.25  |
| NOTCH1 | 218902_at   | GSE29959 | DND41        | 1.33  | 0.52 | 1.05 | 2.5  | 1.59 | 1.09 | 0.99  |
| LMO4   | 209205_s_at | GSE7382  | MCF7         | 1.9   | 1.32 | 1.17 | 0.94 | 0.86 | 1.21 | 1.58  |
| RAF1   | 201244_s_at | GSE29884 | MCF7         | 0.02  | 1    | 0.79 | 0.59 | 0.36 | 1.73 | 11.88 |
| TAL1   | 206283_s_at | GSE48557 | TF1          | 0.76  | 1.43 | 0.56 | 1.41 | 0.71 | 0.87 | 0.99  |
| BAG1   | 202387_at   | GSE51524 | LNCAP        | 10.32 | 0.71 | 0.95 | 3.28 | 1.19 | 1.76 | 2.39  |
| MTDH   | 212248_at   | GSE67249 | MCF7         | 0.96  | 1.5  | 0.99 | 0.33 | 0.32 | 1.23 | 0.45  |
| CAT    | 201432_at   | GSE63955 | HEK293 - TRE | 0.92  | 1.5  | 0.97 | 3.83 | 0.25 | 2.06 | 1.35  |
| YAP1   | 213342_at   | GSE13218 | MCF10A       | 1.26  | 1.17 | 0.82 | 0.67 | 1.59 | 1.32 | 1.48  |
| NOTCH1 | 218902_at   | GSE20285 | MCF10A       | 0.95  | 0.73 | 1.11 | 1.15 | 2.05 | 0.9  | 1.44  |
| NOTCH1 | 218902_at   | GSE29959 | ALLSIL       | 2.23  | 1.34 | 0.43 | 0.7  | 0.6  | 1.04 | 0.92  |
| EWSR1  | 209214_s_at | GSE31215 | MSC          | 1.32  | 1.75 | 0.85 | 2.1  | 4.9  | 1.85 | 0.65  |
| IKBKB  | 209341_s_at | GSE44619 | HCC827       | 2.12  | 1    | 0.94 | 0.4  | 0.5  | 1.59 | 14.33 |

|         |             |          |                |        |      |       |      |       |      |      |
|---------|-------------|----------|----------------|--------|------|-------|------|-------|------|------|
| YWHAZ   | 200639_s_at | GSE20318 | CL10           | 0.07   | 1.83 | 1.25  | 1.88 | 1.14  | 1.3  | 0.79 |
| NUMB    | 207545_s_at | GSE29137 | MCF7           | 0.97   | 1.02 | 1.03  | 2.78 | 1.52  | 1.04 | 1.91 |
| CTNNB1  | 201533_at   | GSE11916 | HUH7           | 1.35   | 1.25 | 1.11  | 2.87 | 4.15  | 1.12 | 0.79 |
| MAP3K14 | 205192_at   | GSE18047 | SACHI          | 2.47   | 1.33 | 1.05  | 6.7  | 3.33  | 1.08 | 1.02 |
| CDH13   | 204726_at   | GSE65363 | U87            | 1.56   | 0.59 | 0.77  | 3.78 | 1.27  | 0.97 | 1    |
| KHSRP   | 204372_s_at | GSE83388 | CL15           | 1      | 2    | 1     | 0.5  | 1.25  | 1.1  | 0.9  |
| MED1    | 203497_at   | GSE41150 | LNCAP          | 1.19   | 3    | 1.02  | 1.38 | 0.88  | 1.19 | 0.49 |
| JAG1    | 216268_s_at | GSE16547 | LEC            | 1.46   | 0.27 | 1.01  | 0.51 | 0.59  | 0.84 | 0.94 |
| NFIC    | 206929_s_at | GSE17636 | MDAMB436       | 1.05   | 1.97 | 0.47  | 7.61 | 3.45  | 0.65 | 0.79 |
| IKBKB   | 209341_s_at | GSE51717 | REH            | 0.6    | 0.75 | 0.75  | 0.42 | 0.64  | 0.84 | 1.13 |
| NOTCH1  | 218902_at   | GSE29850 | HUVEC          | 0.89   | 2.08 | 1.01  | 4.41 | 2.18  | 1.09 | 1.42 |
| STIP1   | 213330_s_at | GSE27654 | MDAH2774       | 0.5    | 1.7  | 1.29  | 0.89 | 2.35  | 1.15 | 0.88 |
| NKX2-8  | 207451_at   | GSE9212  | BEAS2B         | 117.76 | 0.78 | 0.95  | 2.37 | 0.84  | 1.6  | 4.1  |
| PIAS3   | 203035_s_at | GSE42979 | A549           | 4.48   | 1.46 | 1.01  | 3.41 | 0.46  | 0.93 | 1.18 |
| RUNX1   | 209360_s_at | GSE28317 | CD34+ cells    | 41.99  | 0.43 | 13.04 | 0.5  | 1.43  | 0.41 | 0.44 |
| MKL1    | 212748_at   | GSE13710 | HEL            | 0.69   | 0.55 | 1.22  | 0.53 | 2.48  | 0.87 | 2.37 |
| PURA    | 204020_at   | GSE14464 | LNCAP          | 1.59   | 1.23 | 1.01  | 1.75 | 3.41  | 0.92 | 1.88 |
| NOTCH1  | 218902_at   | GSE12355 | ERE25          | 2.33   | 7.24 | 1.56  | 3.29 | 2.67  | 2.9  | 1.22 |
| CD99    | 201029_s_at | GSE61928 | SAOS2          | 1.42   | 1.1  | 0.89  | 1.16 | 2.51  | 1.03 | 0.86 |
| YAP1    | 213342_at   | GSE61764 | HUCCT1         | 0.93   | 1.34 | 1.21  | 1.51 | 1.22  | 0.77 | 1.52 |
| TP53    | 201746_at   | GSE64738 | MES7           | 1.99   | 1.83 | 0.7   | 1.44 | 0.38  | 0.49 | 0.96 |
| RELA    | 201783_s_at | GSE32975 | HACAT          | 2.52   | 1.58 | 0.71  | 6.15 | 4.61  | 0.46 | 1.46 |
| NUP98   | 203195_s_at | GSE57194 | CD34+ cells    | 3.19   | 5.4  | 0.91  | 3.52 | 11.97 | 0.85 | 1.11 |
| RCAN1   | 208370_s_at | GSE48841 | endothelial ce | 2.83   | 1.32 | 0.98  | 3.42 | 1.35  | 0.68 | 0.99 |
| TP53    | 201746_at   | GSE64738 | MES1           | 4      | 2.34 | 0.81  | 0.61 | 0.95  | 0.94 | 0.81 |
| NCOR2   | 207760_s_at | GSE8346  | HMT3522        | 4      | 2.29 | 1.05  | 1.56 | 1.5   | 0.89 | 1.74 |
| H2AFY   | 207168_s_at | GSE53103 | HELA           | 5.61   | 1.11 | 1.31  | 0.46 | 1.32  | 0.88 | 0.79 |
| CDH1    | 201131_s_at | GSE55529 | IPH926         | 1.09   | 1.09 | 0.73  | 0.91 | 0.41  | 1.4  | 1.05 |
| PNP     | 201695_s_at | GSE53604 | HELA           | 1.17   | 0.89 | 1.05  | 3.28 | 1.35  | 0.67 | 1.04 |
| KEAP1   | 202417_at   | GSE66473 | CL15           | 0.52   | 0.31 | 1.02  | 0.75 | 1.17  | 0.93 | 0.85 |
| RUNX1   | 209360_s_at | GSE57194 | CD34+ cells    | 1.77   | 1.72 | 1.04  | 9.83 | 4.08  | 0.72 | 0.72 |
| AR      | 211110_s_at | GSE44924 | LNCAP          | 3.33   | 1.48 | 1.14  | 2.92 | 1.17  | 1.01 | 2.39 |
| ARL2BP  | 202092_s_at | GSE58224 | BL2            | 0.9    | 1.41 | 1.09  | 1.14 | 3.07  | 0.94 | 1.01 |

|          |             |          |                 |        |      |      |      |      |      |       |
|----------|-------------|----------|-----------------|--------|------|------|------|------|------|-------|
| MYB      | 204798_at   | GSE1318  | MCF7            | 0.67   | 0.26 | 1    | 0.67 | 1.42 | 0.81 | 0.52  |
| PML      | 211012_s_at | GSE57194 | CD34+ cells     | 4.49   | 1.66 | 1.07 | 4.4  | 2.68 | 0.89 | 0.89  |
| MYC      | 202431_s_at | GSE34055 | HMEC            | 0.88   | 0.83 | 0.89 | 0.57 | 2.57 | 0.96 | 1.02  |
| WHSC1    | 209054_s_at | GSE50072 | KMS11           | 1.94   | 1.98 | 0.45 | 1.77 | 1.39 | 0.77 | 1.25  |
| PA2G4    | 214794_at   | GSE12200 | C81             | 0      | 7    | 0.75 | 0.28 | 0.89 | 0.68 | 3.66  |
| OLR1     | 210004_at   | GSE13139 | HAECT           | 1.58   | 1.15 | 1.04 | 1.17 | 1.81 | 0.92 | 0.99  |
| ZMYM2    | 202778_s_at | GSE15811 | CD34+ cells     | 0.78   | 0.63 | 1.64 | 0.91 | 1.24 | 1.4  | 0.62  |
| DKK1     | 204602_at   | GSE8066  | IMR32           | 0.73   | 1.52 | 0.96 | 0.57 | 0.67 | 2.13 | 1.17  |
| IKBKB    | 209341_s_at | GSE18047 | NCIH929         | 0.94   | 1    | 0.79 | 1.52 | 1.11 | 0.71 | 1.1   |
| ABL1     | 202123_s_at | GSE15811 | CD34+ cells     | 0.62   | 0.87 | 1.15 | 1.36 | 1.5  | 1.63 | 0.55  |
| DLC1     | 210762_s_at | GSE46214 | SCP2            | 0.08   | 0.5  | 0.86 | 11   | 0.19 | 0.9  | 1.31  |
| H2AFY    | 207168_s_at | GSE53103 | NAMALWA         | 1.53   | 1.78 | 0.84 | 5.1  | 0.17 | 0.93 | 0.89  |
| RBM14    | 204178_s_at | GSE70540 | A549            | 0.77   | 0.38 | 1    | 4.35 | 2.44 | 0.98 | 1.06  |
| MYC      | 202431_s_at | GSE29959 | KOPTK1          | 1.77   | 7.3  | 3.4  | 1.51 | 2.38 | 0.92 | 0.95  |
| IKBKB    | 209341_s_at | GSE18047 | SACHI           | 0.58   | 1    | 1.22 | 5.4  | 4.69 | 0.97 | 1.06  |
| ELK1     | 203617_x_at | GSE48792 | CSES7           | 0.75   | 0.5  | 0.88 | 2.28 | 1.17 | 1.52 | 1.02  |
| CAT      | 201432_at   | GSE12355 | ERE25           | 0.82   | 1.85 | 1.54 | 1.07 | 2.82 | 0.86 | 0.99  |
| PEBP1    | 210825_s_at | GSE47378 | MDAMB231-1      | 0.51   | 0.34 | 0.92 | 6.9  | 0.47 | 0.97 | 0.91  |
| FGFR3    | 204379_s_at | GSE61352 | urothelial cell | 2.06   | 1.33 | 0.71 | 2.73 | 0.84 | 1.24 | 3.72  |
| IL6      | 205207_at   | GSE11883 | MZCHA1          | 0.49   | 2.5  | 0.88 | 1.29 | 1.17 | 0.99 | 1.17  |
| REPIN1   | 219041_s_at | GSE83140 | PC3             | 0.66   | 3    | 1.07 | 0.68 | 1.05 | 1.01 | 0.82  |
| PRKAR1A  | 200603_at   | GSE12854 | OVCAR8          | 8.33   | 0.58 | 1.62 | 0.93 | 1.53 | 1.33 | 0.03  |
| NOTCH1   | 218902_at   | GSE29959 | KOPTK1          | 0.97   | 2.1  | 4.1  | 0.7  | 2.45 | 1.34 | 0.96  |
| MYB      | 204798_at   | GSE2815  | MCF7            | 0.97   | 0.91 | 0.88 | 0.7  | 3.19 | 0.89 | 1.08  |
| RECK     | 205407_at   | GSE56898 | MDAMB231        | 2.28   | 1    | 1    | 0.53 | 1.4  | 1.27 | 1.05  |
| BRCA1    | 204531_s_at | GSE30296 | SKOV3           | 332.69 | 0.97 | 1.04 | 0.7  | 1.92 | 0.27 | 1.49  |
| IKBKB    | 209341_s_at | GSE44619 | H23             | 2      | 1    | 1.05 | 0.84 | 0.63 | 0.84 | 0.96  |
| RAD21    | 200608_s_at | GSE47641 | KASUMI1         | 3      | 1.5  | 1.83 | 1.38 | 1.81 | 0.93 | 0.81  |
| ARL2BP   | 202092_s_at | GSE58224 | BJAB            | 2.27   | 1.46 | 1.07 | 0.97 | 0.8  | 0.93 | 1     |
| MYC      | 202431_s_at | GSE29959 | HPBALL          | 0.75   | 1.67 | 1.96 | 0.88 | 2.68 | 0.86 | 0.97  |
| XBP1     | 200670_at   | GSE8562  | MCF7            | 2.91   | 1.07 | 1.71 | 2.17 | 1.15 | 1.49 | 10.63 |
| IKBKB    | 209341_s_at | GSE44619 | PC9             | 0.38   | 1    | 1.03 | 0.18 | 0.25 | 0.88 | 1     |
| PPARGC1A | 219195_at   | GSE19643 | MSC             | 0.3    | 2.08 | 0.41 | 3.79 | 1.29 | 0.75 | 0.81  |



|        |             |          |               |       |      |      |      |      |       |       |
|--------|-------------|----------|---------------|-------|------|------|------|------|-------|-------|
| TP53   | 201746_at   | GSE8660  | NCIH1299      | 0.7   | 3.5  | 1.12 | 2.08 | 0.8  | 0.74  | 0.76  |
| KDM8   | 220070_at   | GSE56908 | LNCAP         | 0.48  | 1    | 0.88 | 5.67 | 0.78 | 1.34  | 2.5   |
| EGFR   | 201984_s_at | GSE32975 | HACAT         | 0.76  | 1.41 | 0.88 | 2.81 | 1.99 | 0.78  | 1.05  |
| ZNF217 | 203739_at   | GSE35511 | MDAMB231      | 8.5   | 0.98 | 0.98 | 1.26 | 0.69 | 0.87  | 0.98  |
| NOTCH2 | 212377_s_at | GSE12355 | ERE25         | 0.95  | 9.26 | 2.87 | 1.13 | 1.25 | 0.93  | 1.33  |
| RBM14  | 204178_s_at | GSE70540 | LOVO          | 1.02  | 1.33 | 0.99 | 1.06 | 3.67 | 0.95  | 0.98  |
| YAP1   | 213342_at   | GSE10196 | MCF10A        | 2.06  | 1.33 | 1.54 | 0.3  | 3.31 | 0.8   | 3.6   |
| MYC    | 202431_s_at | GSE29959 | DND41         | 1.75  | 0.52 | 1.14 | 1.59 | 0.98 | 0.78  | 0.85  |
| MYBL1  | 213906_at   | GSE1318  | MCF7          | 0.71  | 0.46 | 0.82 | 0.99 | 0.91 | 0.83  | 0.21  |
| RASSF1 | 204346_s_at | GSE24473 | T47D          | 0.96  | 3.06 | 0.69 | 0.77 | 2.75 | 0.41  | 0.83  |
| IKBKB  | 209341_s_at | GSE44619 | A549          | 1.1   | 1    | 1.34 | 0.3  | 2.86 | 1.1   | 0.78  |
| NFKBIA | 201502_s_at | GSE44619 | H23           | 1.5   | 0.5  | 1.16 | 0.88 | 0.71 | 0.89  | 0.89  |
| IKBKB  | 209341_s_at | GSE44619 | H358          | 0.28  | 1    | 0.46 | 1.12 | 1    | 1.17  | 3.98  |
| MYC    | 202431_s_at | GSE29959 | ALLSIL        | 0.55  | 4.75 | 0.86 | 0.81 | 1.28 | 0.75  | 0.87  |
| RB1    | 203132_at   | GSE29783 | H9            | 1.12  | 2.62 | 0.99 | 5.97 | 1.07 | 0.81  | 1.49  |
| AKT1   | 207163_s_at | GSE45276 | IMR90         | 0.97  | 0.63 | 0.97 | 2.41 | 0.91 | 0.44  | 1.25  |
| RECK   | 205407_at   | GSE56898 | LM24175       | 0.91  | 0.5  | 0.71 | 0.39 | 1.15 | 0.98  | 1.23  |
| MYC    | 202431_s_at | GSE29959 | TALL1         | 0.78  | 2    | 2.02 | 1.29 | 0.85 | 0.68  | 0.8   |
| MSX1   | 205932_s_at | GSE9339  | SJNB8         | 2.25  | 1.42 | 0.93 | 4.33 | 2.76 | 42.28 | 0.49  |
| YWHAZ  | 200639_s_at | GSE52032 | MCF10A        | 0.31  | 0.7  | 0.36 | 2.31 | 1.02 | 0.35  | 24.5  |
| NDRG1  | 200632_s_at | GSE25086 | MIAPACA2      | 2.09  | 2.1  | 0.83 | 0.6  | 1.67 | 1.71  | 1.69  |
| BCR    | 202315_s_at | GSE15811 | CD34+ cells   | 1.13  | 1.69 | 0.97 | 0.96 | 1.04 | 1.49  | 0.68  |
| ERBB2  | 216836_s_at | GSE14987 | MCF10A        | 1.83  | 1.85 | 0.47 | 1.79 | 5.29 | 1.32  | 0.52  |
| PIK3CA | 204369_at   | GSE17785 | MCF10A        | 0.7   | 1.19 | 0.48 | 1.34 | 0.96 | 1.93  | 2.84  |
| GRHL2  | 219388_at   | GSE44808 | human broncl  | 1.02  | 1.84 | 0.84 | 1.09 | 1.26 | 0.8   | 1.82  |
| SDCBP  | 200958_s_at | GSE57760 | FADU          | 0.7   | 1.03 | 1.1  | 2.21 | 0.6  | 0.72  | 1.38  |
| RUNX1  | 209360_s_at | GSE10520 | U937          | 0.49  | 0.5  | 1.27 | 0.56 | 0.8  | 1.1   | 1.08  |
| SNAI2  | 213139_at   | GSE55269 | keratinocytes | 1.74  | 2.5  | 0.54 | 4.64 | 0.35 | 0.68  | 11.15 |
| TP63   | 209863_s_at | GSE20286 | MCF10A        | 6.11  | 0.89 | 2.21 | 3.24 | 1.41 | 0.72  | 0.95  |
| TP53   | 201746_at   | GSE21105 | DLD1          | 0.99  | 0.18 | 0.57 | 1.33 | 6.83 | 0.27  | 6.25  |
| BCL11B | 219528_s_at | GSE21382 | JURKAT        | 0.4   | 1    | 1.24 | 0.06 | 4.6  | 0.64  | 0.93  |
| ZBTB16 | 205883_at   | GSE18476 | U937          | 1.01  | 0.83 | 4.72 | 0.51 | 1.49 | 0.11  | 0.97  |
| TGFBR2 | 208944_at   | GSE10847 | NCIH522       | 46.24 | 0.44 | 1.66 | 0.27 | 6.83 | 1.44  | 0.73  |

|          |             |          |              |        |      |       |      |      |       |       |
|----------|-------------|----------|--------------|--------|------|-------|------|------|-------|-------|
| HSF1     | 202344_at   | GSE19797 | HELA         | 0.64   | 1    | 1.16  | 1.11 | 2.73 | 0.86  | 1.04  |
| PRSS2    | 205402_x_at | GSE32056 | HSC3         | 0.78   | 1.3  | 1.05  | 0.5  | 2.19 | 1.17  | 3.21  |
| SOX2     | 213721_at   | GSE11330 | MCF7         | 1.81   | 0.83 | 0.45  | 2.5  | 0.36 | 1.02  | 0.77  |
| FOXO1    | 202724_s_at | GSE40543 | human skelet | 0.9    | 1.15 | 3.39  | 6.25 | 0.62 | 0.45  | 0.58  |
| GATA3    | 209602_s_at | GSE24249 | MDAMB231     | 0.31   | 0.28 | 1.48  | 4.49 | 1.31 | 0.82  | 0.33  |
| HLX      | 214438_at   | GSE13054 | HUVEC        | 0.74   | 8.64 | 1.04  | 1.44 | 0.65 | 1.32  | 1.11  |
| XIAP     | 206536_s_at | GSE11618 | HCT116       | 1.98   | 1.39 | 1.07  | 3.23 | 2.66 | 0.89  | 2.17  |
| SMAD7    | 204790_at   | GSE18070 | MCF10A       | 4      | 1.36 | 1.28  | 3.66 | 2.25 | 1.09  | 0.52  |
| GRHL2    | 219388_at   | GSE44807 | human broncl | 1.2    | 1.25 | 0.74  | 0.85 | 0.58 | 0.78  | 4.49  |
| PPARGC1A | 219195_at   | GSE36879 | A375P        | 1.31   | 0.77 | 1.12  | 1.9  | 0.33 | 0.57  | 2.31  |
| BHLHE41  | 221530_s_at | GSE33950 | MDAMB231     | 0.13   | 1.09 | 1.07  | 1.57 | 0.73 | 0.87  | 1.1   |
| MEX3D    | 91816_f_at  | GSE12239 | HEK293       | 1.04   | 0.15 | 35.37 | 2.12 | 0.53 | 14.57 | 29.82 |
| BCL3     | 204908_s_at | GSE60551 | HACAT        | 2.77   | 0.81 | 0.68  | 0.51 | 3.25 | 0.89  | 3.24  |
| EHMT2    | 202326_at   | GSE22810 | CL15         | 161.25 | 0.03 | 1.07  | 1.35 | 1.75 | 0.76  | 0.64  |

| 221884_at | 220792_at | 211110_s_at | 220043_s_at | 203256_at | 38691_s_at | 220186_s_at | 202018_s_at | 208570_at | 205883_at | 208570_at |
|-----------|-----------|-------------|-------------|-----------|------------|-------------|-------------|-----------|-----------|-----------|
| 7.74      | 0.86      | 0.89        | 1.15        | 2.81      | 1.58       | 1.31        | 1.3         | 2.86      | 5.05      | 2.86      |
| 1.47      | 0.88      | 0.76        | 0.89        | 1.09      | 1.62       | 1.09        | 0.9         | 0.88      | 0.92      | 0.88      |
| 3.73      | 1.23      | 1.68        | 1.27        | 1.37      | 0.94       | 0.73        | 0.81        | 3.33      | 1.08      | 3.33      |
| 1.17      | 1.77      | 1.02        | 2.63        | 1.34      | 2.08       | 1.08        | 2.61        | 1.71      | 2.06      | 1.71      |
| 0.94      | 1.52      | 1.54        | 1.17        | 1.64      | 1.57       | 0.88        | 1.09        | 1.1       | 3.76      | 1.1       |
| 4.63      | 1.39      | 1           | 8.08        | 1.24      | 1.33       | 3.43        | 1.4         | 3.19      | 1.39      | 3.19      |
| 0.4       | 0.92      | 1           | 0.5         | 0.36      | 0.47       | 1.38        | 1           | 2.33      | 1.47      | 2.33      |
| 521.37    | 0.75      | 0.96        | 5.74        | 0.37      | 1.16       | 0.61        | 0.62        | 0.79      | 0.72      | 0.79      |
| 0.92      | 293.65    | 0.66        | 0.91        | 1.61      | 1.48       | 0.89        | 1.97        | 2.79      | 0.66      | 2.79      |
| 0.65      | 0.99      | 268.62      | 0.87        | 1.13      | 2.32       | 0.67        | 1.33        | 16.15     | 7.57      | 16.15     |
| 0.55      | 0.71      | 0.87        | 235         | 6.67      | 0.88       | 0.73        | 0.43        | 0.29      | 0.48      | 0.29      |
| 1.2       | 0.79      | 0.22        | 0.59        | 205.96    | 1.55       | 0.82        | 0.57        | 2.67      | 0.67      | 2.67      |
| 1.04      | 0.79      | 1.02        | 1.08        | 0.14      | 173.51     | 1.09        | 1.16        | 3.26      | 1.22      | 3.26      |
| 30.24     | 7.09      | 10.4        | 9.17        | 0.01      | 32.84      | 169.81      | 8.3         | 67.31     | 59.78     | 67.31     |
| 1.52      | 1.4       | 0.7         | 1.43        | 0.6       | 1.51       | 0.86        | 169         | 3.38      | 2.4       | 3.38      |
| 1.24      | 1.99      | 1.12        | 0.53        | 3.82      | 0.98       | 1.8         | 0.45        | 156.88    | 0.94      | 156.88    |
| 2.18      | 0.74      | 1.14        | 2.85        | 5.2       | 2.85       | 0.63        | 11.56       | 1.67      | 153.83    | 1.67      |
| 0.61      | 3.05      | 1.52        | 0.61        | 2.47      | 0.65       | 1.1         | 1.42        | 138.69    | 7.42      | 138.69    |
| 7.8       | 0.97      | 0.82        | 1.31        | 3         | 1.29       | 0.44        | 1           | 3.17      | 0.55      | 3.17      |
| 2.62      | 3.45      | 1.2         | 1.66        | 1.42      | 2.55       | 1.72        | 3.13        | 1.33      | 1.19      | 1.33      |
| 4.33      | 0.19      | 1.67        | 2.17        | 1.28      | 1.62       | 1.86        | 0.95        | 0.51      | 1.62      | 0.51      |
| 1.72      | 13.53     | 10.97       | 20.39       | 2.57      | 6.84       | 5.08        | 11.44       | 7.07      | 8.55      | 7.07      |
| 1.24      | 2.74      | 1.5         | 8           | 24.24     | 0.71       | 0.47        | 1.58        | 3.25      | 0.28      | 3.25      |
| 0.14      | 0.91      | 1.42        | 0.98        | 0         | 0.69       | 1.77        | 0.69        | 3.25      | 1.95      | 3.25      |
| 0.16      | 0.69      | 0.42        | 6.94        | 0.04      | 1.56       | 0.8         | 0.73        | 1.67      | 0.17      | 1.67      |
| 0.53      | 0.92      | 0.87        | 1.72        | 0.94      | 1.14       | 0.9         | 0.56        | 1.4       | 1.43      | 1.4       |
| 1.09      | 1.09      | 1.14        | 1.18        | 0.62      | 1.58       | 0.46        | 1           | 0.23      | 0.25      | 0.23      |
| 0.88      | 2.44      | 3.7         | 1.47        | 5.63      | 2.31       | 2.77        | 2.52        | 3.32      | 18.34     | 3.32      |
| 90.42     | 1.41      | 1.32        | 3.89        | 13.38     | 1.04       | 1.12        | 0.82        | 0.91      | 1.13      | 0.91      |
| 1.23      | 1.28      | 1.11        | 1.4         | 1.4       | 1.39       | 0.98        | 1.07        | 1.04      | 1.45      | 1.04      |

|       |      |      |      |       |      |      |       |       |      |       |
|-------|------|------|------|-------|------|------|-------|-------|------|-------|
| 0.63  | 2.61 | 2    | 1.39 | 0.74  | 0.86 | 1.68 | 10.2  | 4.67  | 0.73 | 4.67  |
| 0.7   | 1.21 | 3.1  | 0.79 | 0.04  | 2.88 | 1.7  | 0.4   | 1.62  | 0.56 | 1.62  |
| 0.96  | 1.29 | 1.18 | 1.02 | 0.93  | 1.4  | 0.88 | 3.36  | 3.68  | 1.19 | 3.68  |
| 0.55  | 1.78 | 1.42 | 1.09 | 0.39  | 2.42 | 3.22 | 1.23  | 9.76  | 0.33 | 9.76  |
| 2.84  | 1.07 | 2.38 | 0.75 | 0.73  | 2.66 | 1.56 | 5.04  | 1     | 2.12 | 1     |
| 16.92 | 3.58 | 5.49 | 1.47 | 0.52  | 0.85 | 1.97 | 33.08 | 10.82 | 2.38 | 10.82 |
| 0.08  | 0.83 | 0.41 | 0.97 | 17.73 | 5.79 | 1.43 | 3.73  | 1.32  | 1.15 | 1.32  |
| 1.01  | 1.42 | 1.35 | 1    | 1.88  | 1.96 | 1.46 | 1.5   | 2     | 0.79 | 2     |
| 0.24  | 2.7  | 2.33 | 1.43 | 0.66  | 0.9  | 0.34 | 2.57  | 4.28  | 1.14 | 4.28  |
| 1.17  | 0.16 | 0.69 | 2.1  | 0.06  | 0.85 | 1.36 | 1.5   | 0.22  | 0.4  | 0.22  |
| 2.4   | 1.13 | 0.42 | 0.7  | 1.4   | 6.82 | 0.75 | 1.33  | 2.6   | 3.34 | 2.6   |
| 0.24  | 0.78 | 3.39 | 3.54 | 0.45  | 0.71 | 0.73 | 1.31  | 0.95  | 2.55 | 0.95  |
| 0.67  | 0.66 | 0.42 | 0.37 | 0.97  | 0.86 | 1.29 | 3     | 1.16  | 2.41 | 1.16  |
| 1.96  | 0.76 | 4.21 | 1.17 | 2.5   | 2.37 | 0.77 | 1.35  | 2.14  | 0.92 | 2.14  |
| 1.13  | 0.76 | 0.58 | 0.32 | 0.96  | 0.95 | 1.25 | 2.92  | 0.96  | 1.68 | 0.96  |
| 1.61  | 0.99 | 0.93 | 1.22 | 36.66 | 0.85 | 1.64 | 1.28  | 0.89  | 1.04 | 0.89  |
| 1.14  | 1.21 | 1.11 | 1    | 0.8   | 0.64 | 0.31 | 1     | 0.5   | 0.13 | 0.5   |
| 1.6   | 1.18 | 3.42 | 7.27 | 1.94  | 1.98 | 1.18 | 3.26  | 1.22  | 0.59 | 1.22  |
| 1     | 0.88 | 0.68 | 0.79 | 0.87  | 1.06 | 1.45 | 1.17  | 0.81  | 0.83 | 0.81  |
| 0.92  | 1.18 | 2.52 | 1.97 | 3.64  | 2.09 | 1.25 | 0.76  | 1.73  | 4.48 | 1.73  |
| 0.97  | 0.54 | 0.55 | 0.52 | 0.88  | 0.8  | 1.82 | 1     | 0.13  | 0.37 | 0.13  |
| 0.76  | 4.63 | 0.96 | 1.89 | 0.79  | 1.64 | 0.91 | 0.33  | 1.05  | 2.78 | 1.05  |
| 0.81  | 0.88 | 1.59 | 0.72 | 1.02  | 1.15 | 0.87 | 1.39  | 1.95  | 0.71 | 1.95  |
| 5.79  | 1.02 | 1.04 | 2.94 | 1.65  | 1.46 | 1.22 | 1.06  | 2.99  | 1.79 | 2.99  |
| 0.56  | 0.22 | 0.7  | 1.08 | 2.92  | 1.15 | 1.74 | 1.62  | 2.26  | 1.52 | 2.26  |
| 2.37  | 1.48 | 0.48 | 0.13 | 0.67  | 1.02 | 0.59 | 0.67  | 0.23  | 1.09 | 0.23  |
| 0.63  | 0.67 | 3.34 | 0.52 | 0.4   | 0.98 | 3.26 | 24.17 | 1.22  | 0.54 | 1.22  |
| 0.79  | 1.53 | 1.82 | 2.63 | 18.15 | 0.84 | 0.68 | 0.86  | 1.07  | 2.36 | 1.07  |
| 0.8   | 1.1  | 0.89 | 0.11 | 1.19  | 2.35 | 0.68 | 1.5   | 3     | 1.47 | 3     |
| 0.42  | 0.8  | 1.45 | 0.29 | 0.74  | 0.91 | 1.41 | 7.25  | 0.91  | 2    | 0.91  |
| 0.78  | 0.68 | 0.92 | 3.82 | 0.79  | 1.41 | 2.63 | 1.12  | 1.42  | 7.13 | 1.42  |
| 0.98  | 2.48 | 1.46 | 0.91 | 1.78  | 1.93 | 1.43 | 0.63  | 3.75  | 10   | 3.75  |
| 7.61  | 1.36 | 0.84 | 2.75 | 3.19  | 1.21 | 0.98 | 4.13  | 0.56  | 1.35 | 0.56  |

|      |      |       |      |        |      |      |       |      |       |      |
|------|------|-------|------|--------|------|------|-------|------|-------|------|
| 0.93 | 0.85 | 1.46  | 0.85 | 1.44   | 2.02 | 1.03 | 0.83  | 7    | 0.36  | 7    |
| 1.97 | 0.74 | 0.88  | 0.6  | 1.35   | 1.57 | 1.51 | 2.5   | 2.05 | 8.62  | 2.05 |
| 1.09 | 0.75 | 5.07  | 3.12 | 9.93   | 1.05 | 1.11 | 1.25  | 0.3  | 1.77  | 0.3  |
| 5.49 | 1.53 | 1.33  | 0.97 | 5.56   | 1.9  | 1.29 | 1.51  | 2.65 | 1.45  | 2.65 |
| 1.26 | 1.14 | 1.49  | 1.47 | 0.43   | 2.02 | 1.83 | 1.71  | 1.68 | 3.79  | 1.68 |
| 1.07 | 0.69 | 1.41  | 1.58 | 1.12   | 1.62 | 1.62 | 0.85  | 0.06 | 1.22  | 0.06 |
| 0.02 | 1.42 | 2.01  | 1.88 | 2.17   | 2.83 | 0.9  | 0.96  | 1.9  | 4.62  | 1.9  |
| 0.85 | 0.91 | 1.22  | 3.43 | 0.84   | 1.44 | 1.74 | 14.06 | 4.12 | 1.39  | 4.12 |
| 1.02 | 1.35 | 0.97  | 2.16 | 0.86   | 0.85 | 0.9  | 1.16  | 2.06 | 0.27  | 2.06 |
| 1.83 | 1.61 | 0.9   | 0.44 | 1.13   | 1.78 | 0.86 | 1.96  | 0.6  | 0.82  | 0.6  |
| 8.17 | 1.17 | 3.59  | 3.29 | 1.87   | 0.95 | 1.7  | 2.64  | 1.87 | 2.01  | 1.87 |
| 1.1  | 0.56 | 12.2  | 2.71 | 0.71   | 0.34 | 1.26 | 1     | 1    | 0.79  | 1    |
| 0.94 | 0.88 | 1.44  | 1.58 | 5.5    | 1.18 | 0.76 | 22.5  | 1.5  | 0.88  | 1.5  |
| 1.05 | 1.1  | 2.24  | 0.74 | 1.74   | 1.7  | 1    | 1.05  | 2.19 | 2.66  | 2.19 |
| 1.41 | 0.51 | 4.8   | 1    | 4      | 3.48 | 0.46 | 0.5   | 2.5  | 1.1   | 2.5  |
| 0.62 | 0.07 | 0.02  | 0.2  | 0.05   | 0.06 | 0.05 | 0.04  | 0.36 | 0.3   | 0.36 |
| 1.55 | 0.89 | 1.8   | 2.17 | 1.4    | 1.35 | 1.23 | 1.16  | 0.35 | 0.92  | 0.35 |
| 9.53 | 0.68 | 0.24  | 0.02 | 1      | 1.02 | 0.46 | 1.67  | 0.12 | 0.2   | 0.12 |
| 3.87 | 4.7  | 1.59  | 0.9  | 0.6    | 0.9  | 0.88 | 1.09  | 4.94 | 1.05  | 4.94 |
| 7.09 | 1.65 | 12.73 | 1.82 | 1.93   | 1.5  | 0.79 | 2.12  | 2.1  | 2.01  | 2.1  |
| 0.19 | 2.6  | 1.41  | 8.34 | 614.06 | 1.78 | 1.13 | 0.78  | 0.3  | 4.91  | 0.3  |
| 0.92 | 1.12 | 0.58  | 1.05 | 1.21   | 0.94 | 1.31 | 75.6  | 1.03 | 0.88  | 1.03 |
| 0.5  | 0.82 | 1.02  | 1.65 | 0.56   | 0.43 | 2.02 | 1.25  | 1.83 | 0.96  | 1.83 |
| 0.63 | 0.96 | 2.08  | 1.79 | 0.81   | 1.58 | 1.02 | 1.3   | 2.5  | 11.36 | 2.5  |
| 0.8  | 2.74 | 2.03  | 1.93 | 1.14   | 0.84 | 0.9  | 2.77  | 1.1  | 1.44  | 1.1  |
| 0.59 | 0.7  | 0.94  | 1.28 | 0.83   | 0.8  | 0.78 | 1.5   | 1.54 | 0.91  | 1.54 |
| 0.84 | 0.62 | 0.78  | 3.7  | 1.61   | 1.15 | 0.95 | 2.62  | 2.88 | 0.92  | 2.88 |
| 2.53 | 1.16 | 3.32  | 1.14 | 1.04   | 0.87 | 1.05 | 1.5   | 1.29 | 1.63  | 1.29 |
| 0.94 | 1.33 | 0.96  | 1.28 | 0.96   | 1.43 | 1.06 | 1.5   | 1.91 | 0.8   | 1.91 |
| 4.03 | 1.13 | 3.24  | 2.18 | 0.6    | 0.94 | 0.8  | 0.78  | 0.83 | 1.12  | 0.83 |
| 1.01 | 1.01 | 0.91  | 1.02 | 3.02   | 0.6  | 3.19 | 0.89  | 1.07 | 0.83  | 1.07 |
| 2.22 | 1.29 | 1.46  | 1.25 | 1.63   | 0.89 | 1.26 | 2.29  | 2.82 | 0.55  | 2.82 |
| 1.2  | 3    | 5.3   | 0.23 | 0.83   | 1.88 | 2.55 | 8.62  | 0.34 | 3.72  | 0.34 |

|       |      |      |       |      |      |      |       |       |      |       |
|-------|------|------|-------|------|------|------|-------|-------|------|-------|
| 0.67  | 1.28 | 1.59 | 1.41  | 1.3  | 2.56 | 1.39 | 1.58  | 1.61  | 3.91 | 1.61  |
| 4.04  | 0.55 | 6.06 | 14.06 | 1.17 | 0.73 | 1.09 | 1.5   | 0.92  | 1.75 | 0.92  |
| 0.97  | 4.36 | 2.48 | 2.63  | 0.82 | 0.78 | 5.52 | 1.25  | 14.82 | 2.62 | 14.82 |
| 1.88  | 0.49 | 1.09 | 2.29  | 1.17 | 1.32 | 0.95 | 1.01  | 2.23  | 1.11 | 2.23  |
| 0.21  | 1.04 | 1.13 | 0.86  | 2.16 | 2.99 | 0.94 | 0.73  | 0.89  | 0.99 | 0.89  |
| 22.13 | 1.38 | 2.22 | 0.34  | 0.97 | 1.4  | 1.45 | 1.33  | 1.6   | 1.86 | 1.6   |
| 1.17  | 1.19 | 1.09 | 0.9   | 1.9  | 0.87 | 0.83 | 10.33 | 5.21  | 1    | 5.21  |
| 0.61  | 0.88 | 1.74 | 0.35  | 0.37 | 0.97 | 0.92 | 0.52  | 0.89  | 3.9  | 0.89  |
| 0.74  | 1.85 | 0.97 | 0.96  | 0.9  | 1.21 | 1.52 | 1.5   | 3.02  | 3.65 | 3.02  |
| 1.29  | 6.96 | 0.77 | 0.89  | 2    | 0.73 | 1.42 | 1.48  | 4.24  | 1.21 | 4.24  |
| 1.03  | 4.03 | 1.24 | 2.55  | 1.15 | 2.46 | 1.32 | 3.41  | 4     | 1.63 | 4     |
| 2.6   | 1.2  | 1.3  | 1.6   | 1.34 | 1.39 | 1.32 | 1.12  | 0.81  | 1.75 | 0.81  |
| 0.99  | 1.27 | 0.66 | 1.81  | 0.83 | 1.57 | 0.91 | 0.95  | 1.75  | 1.54 | 1.75  |
| 1     | 0.8  | 1.23 | 0.58  | 0.64 | 1.6  | 1.52 | 1.17  | 6.05  | 0.56 | 6.05  |
| 1.91  | 1.13 | 0.72 | 1.19  | 2.03 | 1.08 | 0.89 | 0.97  | 0.44  | 0.9  | 0.44  |
| 3.92  | 4.24 | 1.26 | 1.6   | 1.23 | 1.88 | 0.87 | 3.28  | 1.89  | 1.01 | 1.89  |
| 0.07  | 2.58 | 1.21 | 0.94  | 1.36 | 0.57 | 0.83 | 1.67  | 2.78  | 1.63 | 2.78  |
| 5.09  | 1.14 | 1.27 | 0.83  | 7.01 | 1.43 | 1.02 | 1.54  | 0.82  | 1.26 | 0.82  |
| 1.44  | 1.15 | 0.46 | 2.85  | 1.75 | 3.45 | 0.88 | 0.78  | 0.83  | 2.12 | 0.83  |
| 0.93  | 0.55 | 0.69 | 0.38  | 0.12 | 1.3  | 0.79 | 0.86  | 0.19  | 2.83 | 0.19  |
| 0.72  | 0.95 | 0.98 | 0.5   | 1.04 | 1.22 | 0.61 | 1.5   | 1     | 1.3  | 1     |
| 0.75  | 1.48 | 1.78 | 1.27  | 1.23 | 0.57 | 3.69 | 1.04  | 0.19  | 11.1 | 0.19  |
| 0.76  | 0.78 | 1.37 | 1.02  | 1.43 | 1    | 0.87 | 1.21  | 1.11  | 1.17 | 1.11  |
| 1.05  | 0.83 | 1.01 | 0.63  | 1.15 | 1.3  | 1.75 | 2     | 1.02  | 0.33 | 1.02  |
| 1.15  | 0.87 | 1.12 | 1.91  | 2.31 | 1.84 | 2.09 | 1.65  | 4.89  | 0.99 | 4.89  |
| 0.27  | 0.9  | 0.58 | 1.79  | 0.88 | 0.78 | 0.92 | 10.16 | 1.33  | 0.46 | 1.33  |
| 1.23  | 1.45 | 1.71 | 1.25  | 1.11 | 0.22 | 9.4  | 0.67  | 1.8   | 0.08 | 1.8   |
| 0.9   | 1.83 | 0.68 | 2.89  | 7.57 | 0.79 | 1.18 | 1.12  | 0.52  | 2.54 | 0.52  |
| 0.99  | 0.93 | 0.91 | 3.3   | 1.11 | 0.65 | 1.72 | 1.5   | 7.1   | 0.66 | 7.1   |
| 0.81  | 1.29 | 0.92 | 3.45  | 1.06 | 1.3  | 1.29 | 4.74  | 3.5   | 0.92 | 3.5   |
| 1.05  | 6.76 | 0.68 | 0.95  | 0.75 | 4.05 | 1.38 | 0.78  | 0.77  | 0.68 | 0.77  |
| 1.97  | 0.74 | 0.88 | 0.6   | 1.35 | 1.57 | 1.51 | 2.5   | 2.05  | 8.62 | 2.05  |
| 0.88  | 1.12 | 0.82 | 1.2   | 1    | 0.15 | 0.88 | 0.5   | 3     | 1.27 | 3     |

|      |       |      |      |      |      |      |       |      |       |      |
|------|-------|------|------|------|------|------|-------|------|-------|------|
| 0.92 | 1.14  | 0.85 | 1.89 | 0.95 | 1    | 1.52 | 0.54  | 0.99 | 1.73  | 0.99 |
| 1.41 | 1.54  | 0.95 | 1.15 | 1    | 0.95 | 4.06 | 1.21  | 2.49 | 0.6   | 2.49 |
| 1.8  | 6.24  | 1.03 | 0.86 | 2.68 | 1.38 | 1.34 | 0.96  | 6    | 0.95  | 6    |
| 1.49 | 0.78  | 2.86 | 0.66 | 1.02 | 1.05 | 0.81 | 0.4   | 2.19 | 0.72  | 2.19 |
| 1    | 1.02  | 1.03 | Inf  | 66.3 | 1.79 | 0.94 | 1.7   | 0.8  | 1.33  | 0.8  |
| 1.18 | 1.02  | 0.43 | 2.75 | 1.25 | 2    | 0.65 | 1.31  | 1    | 0.12  | 1    |
| 5.06 | 1.09  | 0.95 | 0.88 | 1.71 | 1.65 | 0.97 | 0.97  | 0.36 | 0.79  | 0.36 |
| 0.81 | 0.81  | 1.01 | 1.11 | 0.5  | 2.65 | 0.78 | 1     | 3.73 | 0.93  | 3.73 |
| 1.03 | 0.73  | 1.31 | 2.12 | 1.78 | 0.82 | 0.6  | 1.22  | 0.67 | 13.98 | 0.67 |
| 1.35 | 1.24  | 3.27 | 0.64 | 0.73 | 1.54 | 1.23 | 0.55  | 0.47 | 0.75  | 0.47 |
| 0.77 | 2.39  | 0.38 | 1.04 | 2.87 | 1.44 | 1.52 | 1.14  | 3.09 | 0.94  | 3.09 |
| 0.52 | 0.57  | 0.57 | 0.4  | 0.9  | 1.46 | 3.63 | 1.24  | 0.84 | 3.01  | 0.84 |
| 5.22 | 1.22  | 1.05 | 0.96 | 5.67 | 2.6  | 1.38 | 2.43  | 1.49 | 1.77  | 1.49 |
| 1.96 | 1.17  | 1.42 | 0.8  | 0.33 | 0.6  | 0.77 | 1.38  | 1.17 | 1.25  | 1.17 |
| 0.64 | 1.25  | 1    | 1.01 | 0.51 | 0.79 | 1.43 | 35.42 | 1.42 | 0.2   | 1.42 |
| 1.07 | 1.38  | 1.08 | 1.12 | 0.98 | 1.49 | 2.26 | 1.62  | 6.16 | 1.19  | 6.16 |
| 4.35 | 0.71  | 1.03 | 0.87 | 1.07 | 1.72 | 1.13 | 1.52  | 1.88 | 1.13  | 1.88 |
| 2.67 | 1.89  | 1.48 | 2    | 0.74 | 1.71 | 1.16 | 0.83  | 1.78 | 0.89  | 1.78 |
| 0.77 | 1.37  | 1.16 | 1.64 | 0.66 | 0.77 | 0.95 | 3.46  | 1.14 | 0.8   | 1.14 |
| 1.17 | 2.04  | 2.13 | 3.75 | 1.17 | 1.44 | 2.74 | 3.4   | 3.33 | 1.11  | 3.33 |
| 0.53 | 0.75  | 3.33 | 0.45 | 2.87 | 1.08 | 1.29 | 0.78  | 3.25 | 0.83  | 3.25 |
| 0.92 | 10.74 | 1.77 | 2.59 | 1.14 | 0.87 | 1.92 | 2.51  | Inf  | 1.16  | Inf  |
| 2.46 | 1     | 1.84 | 1.46 | 1.45 | 1.01 | 1.13 | 3.79  | 2.64 | 0.98  | 2.64 |
| 1.46 | 1.16  | 0.81 | 2.97 | 1.08 | 0.84 | 0.73 | 0.65  | 1.3  | 1.1   | 1.3  |
| 1.01 | 1.01  | 1.01 | 0.53 | 6.08 | 3.1  | 1.58 | 28    | 1.22 | 2.43  | 1.22 |
| 1.4  | 1.26  | 1.99 | 1.37 | 1    | 1.51 | 2.21 | 1.47  | 1.43 | 0.79  | 1.43 |
| 1.11 | 0.77  | 0.92 | 0.53 | 3.58 | 0.99 | 0.95 | 0.89  | 2.59 | 0.85  | 2.59 |
| 0.98 | 1.48  | 1.24 | 1.41 | 0.79 | 1.14 | 1.9  | 0.87  | 2.67 | 1.29  | 2.67 |
| 1.01 | 1.01  | 1.25 | 1.99 | 1    | 1.16 | 0.68 | 1.56  | 3.67 | 1.38  | 3.67 |
| 0.53 | 1.11  | 2.04 | 0.84 | 8    | 1.26 | 1.29 | 1     | 0.75 | 1     | 0.75 |
| 1.26 | 1.53  | 1.35 | 2.06 | 0.92 | 1.16 | 1.77 | 2.42  | 2.09 | 1.07  | 2.09 |
| 0.48 | 2     | 0.98 | 0.71 | 0.94 | 1.23 | 1.41 | 0.7   | 1.54 | 2.25  | 1.54 |
| 2.17 | 0.55  | 0.82 | 0.16 | 0.81 | 0.83 | 0.7  | 0.76  | 0.92 | 1.03  | 0.92 |

|       |      |      |      |       |      |      |      |      |      |      |
|-------|------|------|------|-------|------|------|------|------|------|------|
| 1.62  | 0.42 | 0.6  | 1.11 | 1.88  | 0.61 | 0.61 | 0.56 | 1.93 | 0.79 | 1.93 |
| 1.23  | 1.02 | 2.08 | 0.76 | 1.57  | 0.82 | 0.92 | 3.83 | 2.12 | 1.15 | 2.12 |
| 1.11  | 1    | 0.81 | 0.84 | 0.95  | 1    | 0.76 | 1.02 | 1.17 | 0.87 | 1.17 |
| 0.87  | 1.6  | 1.24 | 1.81 | 1.48  | 1.16 | 0.55 | 1.36 | 0.9  | 1.81 | 0.9  |
| 1.07  | 1.59 | 0.6  | 3.33 | 0.61  | 0.85 | 1.47 | 0.82 | 0.18 | 0.51 | 0.18 |
| 0.86  | 1.01 | 1.39 | 0.96 | 1.45  | 2.02 | 0.93 | 1.05 | 1.95 | 0.94 | 1.95 |
| 0.63  | 2.76 | 1.82 | 1.89 | 0.92  | 1.04 | 1.79 | 8.88 | 6    | 0.78 | 6    |
| 1.93  | 1.4  | 0.61 | 0.8  | 1.85  | 1.03 | 0.88 | 0.67 | 0.19 | 0.83 | 0.19 |
| 1.41  | 1    | 5.77 | 5.22 | 0.96  | 1.15 | 0.89 | 0.78 | 0.4  | 2.1  | 0.4  |
| 0.83  | 2.58 | 1.53 | 0.94 | 1.53  | 0.85 | 2.51 | 6.99 | 1.33 | 0.97 | 1.33 |
| 1.99  | 1.56 | 0.11 | 1.55 | 0.22  | 1.66 | 0.91 | 1    | 1    | 0.91 | 1    |
| 6.72  | 0.69 | 0.67 | 5.63 | 1.12  | 0.67 | 0.57 | 0.92 | 2.78 | 3.64 | 2.78 |
| 1     | 0.9  | 0.68 | 1.28 | 1.78  | 0.78 | 0.95 | 1.17 | 2.08 | 2.1  | 2.08 |
| 3.11  | 0.75 | 0.56 | 0.22 | 1.38  | 2.7  | 0.48 | 1    | 4.01 | 1.37 | 4.01 |
| 0.88  | 0.97 | 4.2  | 0.8  | 2.48  | 1.23 | 0.73 | 1.6  | 0.71 | 0.99 | 0.71 |
| 0.87  | 1.04 | 1.22 | 3    | 1.08  | 0.73 | 1.02 | 2.5  | 1.75 | 1.1  | 1.75 |
| 1.63  | 1.73 | 1.04 | 0.94 | 1.53  | 1.07 | 2.72 | 1.55 | 1.4  | 1.22 | 1.4  |
| 0.89  | 1.11 | 1.03 | 0.63 | 2.41  | 0.9  | 1.22 | 0.62 | 0.79 | 0.93 | 0.79 |
| 1.28  | 1.99 | 0.71 | 0.93 | 0.63  | 0.61 | 0.21 | 1.05 | 3.33 | 0.59 | 3.33 |
| 2.6   | 1.78 | 1.36 | 1.52 | 0.92  | 2.27 | 0.88 | 1.18 | 0.88 | 1.38 | 0.88 |
| 0.47  | 5.73 | 1.02 | 1.47 | 0.91  | 0.57 | 1.38 | 1.5  | 1.67 | 0.54 | 1.67 |
| 14.98 | 1.14 | 0.99 | 1.23 | 16.1  | 0.57 | 0.81 | 0.87 | 0.5  | 0.79 | 0.5  |
| 2.91  | 1.88 | 1.48 | 0.83 | 0.75  | 0.63 | 0.5  | 0.5  | 1.73 | 0.58 | 1.73 |
| 3.98  | 0.69 | 1.05 | 1.81 | 0.74  | 0.91 | 0.74 | 1.21 | 0.59 | 0.5  | 0.59 |
| 0.64  | 1.23 | 0.48 | 0.26 | 0.75  | 0.41 | 0.55 | 2    | 1.78 | 0.89 | 1.78 |
| 98.24 | 0.95 | 1.35 | 0.44 | 24.33 | 0.8  | 0.77 | 1.22 | 1.04 | 0.78 | 1.04 |
| 0.98  | 1.39 | 3.6  | 1.06 | 1.67  | 1.79 | 0.72 | 1.5  | 0.62 | 2.83 | 0.62 |
| 0.34  | 0.57 | 0.96 | 2.6  | 1.76  | 0.95 | 0.88 | 1.3  | 1.7  | 1.3  | 1.7  |
| 1.1   | 3.84 | 3.33 | 3.62 | 0.91  | 1.7  | 1.27 | 3.06 | 0.61 | 1.11 | 0.61 |
| 0.7   | 5.56 | 0.47 | 0.55 | 0.82  | 0.87 | 0.45 | 1.17 | 2.56 | 4.45 | 2.56 |
| 2.32  | 1.08 | 1.47 | 1.08 | 0.86  | 1.74 | 1.03 | 0.89 | 1.06 | 4.17 | 1.06 |
| 1     | 0.93 | 0.89 | 0.51 | 0.91  | 0.79 | 2.12 | 1    | 0.07 | 0.89 | 0.07 |
| 5.95  | 0.58 | 3.07 | 0.49 | 4.83  | 4.74 | 0.59 | 1.03 | 1.15 | 4.71 | 1.15 |



|      |      |      |      |      |       |      |      |      |       |      |
|------|------|------|------|------|-------|------|------|------|-------|------|
| 1.02 | 0.94 | 0.92 | 4    | 2.33 | 0.69  | 1.64 | 2.17 | 1.86 | 1.21  | 1.86 |
| 1.23 | 1.55 | 1.61 | 0.33 | 4.5  | 0.58  | 1.38 | 1.26 | 3.33 | 0.62  | 3.33 |
| 1.3  | 4.67 | 1.24 | 1.84 | 0.97 | 1.11  | 0.98 | 2.22 | NA   | 0.75  | NA   |
| 0.95 | 0.53 | 0.44 | 0.2  | 0.42 | 1.14  | 0.97 | 0.59 | 2.64 | 0.69  | 2.64 |
| 1.97 | 0.76 | 1.26 | 2.55 | 1.2  | 2.15  | 1.1  | 1.17 | 1.38 | 1.21  | 1.38 |
| 0.89 | 1.02 | 0.84 | 1.06 | 1.44 | 1.25  | 2.1  | 0.67 | 4.53 | 0.68  | 4.53 |
| 0.56 | 0.81 | 1.54 | 1.05 | 0.8  | 1.16  | 0.94 | 0.68 | 3.23 | 0.7   | 3.23 |
| 1.02 | 1.86 | 1.99 | 1.61 | 1.18 | 0.56  | 3.55 | 3.62 | 0.19 | 7.58  | 0.19 |
| 1.16 | 0.7  | 0.88 | 2.91 | 1.78 | 0.82  | 0.83 | 0.84 | 0.62 | 1     | 0.62 |
| 1.07 | 0.95 | 0.41 | 1.93 | 1.93 | 1.43  | 1.38 | 0.92 | 1.49 | 1.14  | 1.49 |
| 2.71 | 0.62 | 0.78 | 1.1  | 1.33 | 1.29  | 0.84 | 1    | 1.31 | 0.56  | 1.31 |
| 0.96 | 1.15 | 3.7  | 1.28 | 0.24 | 1.07  | 1.14 | 1    | 0.12 | 2.75  | 0.12 |
| 1.29 | 0.62 | 0.69 | 0.32 | 0.62 | 2.67  | 1.28 | 1.5  | 2.5  | 0.76  | 2.5  |
| 1.98 | 4.79 | 1.53 | 0.56 | 0.62 | 0.72  | 1.01 | 0.78 | 0.48 | 0.97  | 0.48 |
| 0.84 | 1.06 | 0.97 | 7.31 | 1.27 | 2.28  | 0.61 | 1.88 | 1.12 | 0.09  | 1.12 |
| 1.05 | 1.1  | 1.73 | 1.64 | 2.11 | 1.76  | 1.44 | 0.97 | 1.01 | 1.1   | 1.01 |
| 1.23 | 1.22 | 1.52 | 4.5  | 0.51 | 0.79  | 0.99 | 1.12 | 0.55 | 1.52  | 0.55 |
| 1.45 | 0.48 | 1.59 | 0.41 | 1.17 | 2     | 1.79 | 1.62 | 0.58 | 0.93  | 0.58 |
| 7.5  | 2.84 | 1.91 | 10   | 1.83 | 1.25  | 1.77 | 1.33 | 1.2  | 16.67 | 1.2  |
| 1.44 | 1.56 | 0.91 | 1.72 | 0.04 | 1.24  | 1.5  | 4.5  | 1.3  | 5.25  | 1.3  |
| 8.67 | 1.17 | 1.67 | 0.79 | 1.98 | 1.57  | 1.93 | 1.69 | 13.1 | 1.84  | 13.1 |
| 0.73 | 2.52 | 1.86 | 0.91 | 1.04 | 0.76  | 2.04 | 9.26 | 2.33 | 0.82  | 2.33 |
| 0.72 | 0.97 | 5.75 | 8.01 | 1.03 | 1.84  | 1.04 | 2.12 | 1.85 | 0.27  | 1.85 |
| 1.08 | 1.04 | 1.23 | 2.01 | 0.05 | 0.46  | 1.27 | 0.99 | 2.13 | 0.45  | 2.13 |
| 1    | 1.13 | 0.77 | 4.35 | 1.19 | 1.29  | 1.57 | 4.42 | 1.26 | 1.65  | 1.26 |
| 0.81 | 1.22 | 0.78 | 3.75 | 1.71 | 1.69  | 1.49 | 0.88 | 4.48 | 2.82  | 4.48 |
| 0.3  | 1.05 | 1.4  | 0.48 | 0.58 | 0.96  | 0.77 | 0.73 | 0.73 | 0.71  | 0.73 |
| 1.8  | 0.94 | 0.6  | 1.98 | 1.01 | 0.81  | 0.69 | 0.75 | 0.5  | 0.55  | 0.5  |
| 0.89 | 0.7  | 1.4  | 0.98 | 2.11 | 1.01  | 0.92 | 1.3  | 1.17 | 0.56  | 1.17 |
| 1.15 | 0.88 | 0.42 | 5.21 | 0.84 | 12.81 | 3.04 | 1.12 | 2.2  | 0.58  | 2.2  |
| 1.29 | 0.4  | 2.25 | 4.88 | 3.67 | 0.91  | 0.64 | 1    | 2.64 | 0.41  | 2.64 |
| 1.78 | 1.03 | 1.08 | 0.86 | 1.4  | 0.79  | 0.99 | 2.16 | 1.9  | 0.48  | 1.9  |
| 0.05 | 2.46 | 0.88 | 3.8  | 3.89 | 1.97  | 1.27 | 1.11 | 1.1  | 8.39  | 1.1  |

|       |       |      |       |      |      |       |      |       |       |       |
|-------|-------|------|-------|------|------|-------|------|-------|-------|-------|
| 0.74  | 0.61  | 0.81 | 0.23  | 2    | 0.95 | 0.96  | 0.88 | 0.6   | 0.35  | 0.6   |
| 0.9   | 1.66  | 1.01 | 0.79  | 0.98 | 0.87 | 2.17  | 1    | 0.33  | 0.73  | 0.33  |
| 1.26  | 8.08  | 1.68 | 19.42 | 1    | 0.88 | 16.14 | 1    | 12.75 | 0.51  | 12.75 |
| 0.69  | 0.92  | 1.11 | 0.76  | 1.87 | 1.17 | 1.25  | 1.23 | 0.36  | 0.94  | 0.36  |
| 0.52  | 1.04  | 2.43 | 0.55  | 1.44 | 1.21 | 1.09  | 1.25 | 1.75  | 1.21  | 1.75  |
| 0.51  | 0.83  | 0.97 | 2.09  | 1.3  | 1.25 | 0.74  | 1.15 | 2.09  | 0.92  | 2.09  |
| 12.77 | 1.16  | 1.46 | 2.17  | 0.92 | 1.08 | 0.83  | 0.88 | 2.67  | 3.11  | 2.67  |
| 0.9   | 2.72  | 0.65 | 1.03  | 1.12 | 2.63 | 1.46  | 0.67 | 6.81  | 1.36  | 6.81  |
| 0.82  | 0.78  | 0.75 | 3.59  | 1.37 | 1    | 1.09  | 6.22 | 0.46  | 2.94  | 0.46  |
| 0.88  | 1.13  | 2.34 | 0.82  | 1.14 | 2.27 | 1.53  | 1.95 | 2.63  | 6.02  | 2.63  |
| 0.9   | 0.64  | 1.47 | 3.71  | 2.66 | 3.87 | 0.73  | 1    | 1.94  | 4.88  | 1.94  |
| 11.72 | 11.74 | 0.06 | 0.36  | 0.69 | 1.78 | 0.25  | 0.9  | 3.38  | 17.38 | 3.38  |
| 1.72  | 0.86  | 1.56 | 1.78  | 0.73 | 1.51 | 0.83  | 1.12 | 2.07  | 1.23  | 2.07  |
| 0.14  | 0.61  | 0.8  | 0.16  | 2    | 0.71 | 1.51  | 2    | 0.25  | 1.5   | 0.25  |

| 220804_s_at | 206858_s_at | 217192_s_at | 203543_s_at | 216248_s_at | 214520_at | 212063_at | 220308_at | 218182_s_at | 211120_x_at | 203680_at |
|-------------|-------------|-------------|-------------|-------------|-----------|-----------|-----------|-------------|-------------|-----------|
| 2.87        | 0.64        | 2.91        | 1           | 1.22        | 4.4       | 1.29      | 1.33      | 0.66        | 1.9         | 1.58      |
| 3.24        | 1.25        | 1.38        | 0.8         | 1.02        | 0.96      | 0.63      | 1         | 2.23        | 2.78        | 1.62      |
| 1.14        | 4.84        | 1.15        | 0.53        | 1.33        | 0.27      | 0.45      | 1.06      | 1.42        | 1.92        | 1.74      |
| 3.82        | 1.61        | 1.47        | 2.14        | 2.4         | 2.45      | 1.18      | 1.64      | 2.88        | 966.77      | 0.98      |
| 1.03        | 0.54        | 1.22        | 1.48        | 1.58        | 1.64      | 1.39      | 0.83      | 4.44        | 0.83        | 0.93      |
| 2.18        | 1.11        | 1.18        | 1.31        | 3.75        | 1.6       | 1.01      | 1.61      | 1.27        | 0.93        | 1.78      |
| 4           | 2.22        | 0.51        | 1.76        | 1           | 4.5       | 1.19      | 1.08      | 0.2         | 0.93        | 0.21      |
| 0.47        | 0.79        | 1.39        | 1.05        | 1.08        | 1.33      | 0.79      | 1.65      | 0.53        | 0.62        | 0.87      |
| 0.64        | 0.76        | 0.84        | 0.57        | 1.64        | 2.84      | 0.85      | 1.04      | 2.22        | 1.49        | 1.27      |
| 7.5         | 1.01        | 4.42        | 1.75        | 4.14        | 2.6       | 0.67      | 3.48      | 1.61        | 6.09        | 1.2       |
| 0.14        | 1.31        | 4.35        | 1.27        | 2.69        | 1.44      | 1.86      | 0.2       | 0.77        | 0.76        | 0.95      |
| 1.57        | 1.22        | 0.6         | 0.87        | 0.56        | 1.51      | 1         | 0.92      | 1.12        | 1.4         | 0.91      |
| 2.46        | 1.57        | 1.05        | 0.73        | 1.02        | 3.55      | 0.26      | 1.34      | 0.46        | 1.19        | 1.54      |
| 16.64       | 1.32        | 8.85        | 3.95        | 0.53        | 18.54     | 0.01      | 7.3       | 11.93       | 58.07       | 0.09      |
| 0.75        | 0.71        | 2.23        | 2.21        | 0.93        | 1.6       | 0.89      | 0.43      | 1.54        | 0.38        | 2.36      |
| 2.39        | 1.32        | 2.81        | 1.16        | 0.8         | 0.75      | 0.8       | 1.52      | 0.53        | 10.1        | 1.3       |
| 0.8         | 1.01        | 2.44        | 0.49        | 0.88        | 1.26      | 1.01      | 0.67      | 6.34        | 2.05        | 1.27      |
| 8.85        | 1.31        | 7.84        | 1.36        | 1.56        | 1.28      | 0.71      | 1.16      | 2.97        | 3.36        | 1.39      |
| 136         | 0.83        | 0.99        | 0.36        | 1.31        | 4.33      | 0.66      | 1.05      | 3.44        | 1           | 0.36      |
| 1.7         | 120.41      | 2.67        | 0.93        | 4.02        | 3.59      | 4.75      | 4.01      | 1.66        | 1.58        | 1.01      |
| 1.78        | 0.9         | 94.18       | 0.39        | 1.27        | 0.99      | 0.51      | 3.33      | 0.79        | 9.56        | 0.28      |
| 13.62       | 1.69        | 3.12        | 91.59       | 1.67        | 13.75     | 2.21      | 7.25      | 2.69        | 50.44       | 1.33      |
| 1.17        | 0.85        | 0.96        | 1.98        | 76.84       | 1.43      | 1.09      | 5.08      | 1.07        | 0.85        | 1.43      |
| 0.92        | 2.31        | 0.75        | 2.48        | 5.24        | 62.74     | 1.67      | 2.7       | 1.36        | 1.27        | 5.33      |
| 0.37        | 0.37        | 0.89        | 0.04        | 0.17        | 3.75      | 52.06     | 0.94      | 3.42        | 1.23        | 0.31      |
| 0.73        | 0.86        | 1.02        | 1.25        | 0.84        | 5.21      | 1.21      | 43.71     | 1.1         | 0.72        | 0.15      |
| 4.15        | 1.06        | 4.73        | 1.66        | 2.32        | 0.66      | 0.52      | 0.41      | 37.13       | 2.05        | 1         |
| 1.42        | 0.6         | 1.16        | 1.59        | 15.09       | 3.95      | 0.6       | 1.27      | 6.77        | 33.54       | 0.46      |
| 0.75        | 0.06        | 1.56        | 0.48        | 1.62        | 0.75      | 0.49      | 5.68      | 0.46        | 1.73        | 32.61     |
| 1.37        | 0.96        | 0.72        | 0.95        | 2           | 2.02      | 1.27      | 1.72      | 1.1         | 2.41        | 1.29      |

|       |       |      |      |       |      |      |      |       |      |       |
|-------|-------|------|------|-------|------|------|------|-------|------|-------|
| 1.41  | 0.93  | 0.89 | 0.91 | 1.9   | 2.21 | 0.71 | 1.22 | 0.35  | 0.73 | 0.54  |
| 1.23  | 2.32  | 1.05 | 8.05 | 0.87  | 2.46 | 2.05 | 0.95 | 0.24  | 5.13 | 0.71  |
| 1.35  | 1.2   | 2.16 | 1.42 | 1.08  | 0.86 | 0.97 | 0.98 | 1.04  | 1.04 | 1.25  |
| 1.3   | 0.35  | 5.91 | 0.45 | 2.64  | 3.51 | 0.54 | 1.99 | 0.42  | 1.56 | 16.68 |
| 0.36  | 1.29  | 0.22 | 0.43 | 1.5   | 21   | 0.11 | 0.64 | 4.64  | 0.2  | 0.62  |
| 4.86  | 1.34  | 4.08 | 0.54 | 2.3   | 2.03 | 1.09 | 2.96 | 2.19  | 1.11 | 0.79  |
| 2.4   | 0.36  | 2.43 | 1.16 | 33.58 | 0.33 | 0.28 | 2.11 | 0.52  | 1.41 | 6.88  |
| 7.71  | 0.8   | 1.79 | 1.13 | 1.12  | 0.95 | 1.04 | 1.18 | 1.74  | 6.6  | 0.79  |
| 7.78  | 1.05  | 1.66 | 0.99 | 0.93  | 0.6  | 1.25 | 0.9  | 0.92  | 3.13 | 25.25 |
| 0.67  | 1.3   | 0.52 | 8.08 | 0.13  | 0.5  | 2.05 | 2.43 | 1.38  | 1.27 | 3.33  |
| 5.75  | 1.38  | 1.07 | 0.71 | 1.45  | 0.73 | 0.06 | 0.23 | 0.52  | 1.35 | 0.95  |
| 0.73  | 1.04  | 0.42 | 1.22 | 0.94  | 2.28 | 0.95 | 1.93 | 1.04  | 1.23 | 1.04  |
| 0.22  | 0.91  | 2.92 | 4.65 | 1.2   | 1.72 | 0.74 | 3.96 | 10.42 | 0.22 | 3.11  |
| 0.83  | 4.77  | 1.59 | 1.71 | 0.32  | 1.59 | 3.35 | 2.45 | 1.95  | 2.55 | 2.55  |
| 0.3   | 0.81  | 1.95 | 3.21 | 1.12  | 1.56 | 0.78 | 3.98 | 7.79  | 0.22 | 3.56  |
| 1.1   | 14.43 | 1.29 | 1.19 | 8.07  | 1.37 | 2.72 | 1.42 | 3.69  | 3.12 | 14.93 |
| 16    | 1.14  | 1.46 | 1.19 | 0.69  | 0.21 | 0.96 | 0.63 | 0.71  | 1.9  | 2.63  |
| 2.81  | 1.32  | 2.88 | 1.48 | 0.98  | 2.53 | 0.74 | 0.19 | 1.02  | 1.46 | 0.47  |
| 2.46  | 1.06  | 0.56 | 1.06 | 0.95  | 1.17 | 1.13 | 4.34 | 1.04  | 3.19 | 0.98  |
| 1.1   | 0.95  | 1.16 | 2.37 | 1.98  | 1.18 | 0.96 | 0.66 | 1.1   | 1.22 | 0.82  |
| 0.5   | 1.7   | 0.43 | 0.59 | 0.93  | 1    | 0.97 | 1.51 | 0.45  | 0.29 | 1.06  |
| 2.07  | 0.53  | 0.74 | 0.89 | 1.01  | 0.63 | 1.27 | 2.62 | 1.6   | 4.75 | 0.63  |
| 1.05  | 1.21  | 1.65 | 1.22 | 0.77  | 1.76 | 1.16 | 1.26 | 2.6   | 5.99 | 1.16  |
| 2.73  | 2.38  | 4.69 | 1.69 | 1.7   | 1.11 | 1.76 | 1.65 | 1.61  | 2.04 | 0.99  |
| 2.38  | 0.64  | 3.92 | 0.5  | 0.06  | 3.16 | 0.92 | 5.67 | 1.13  | 3.73 | 0.2   |
| 9.4   | 0.92  | 1.24 | 0.72 | 2.36  | 0.62 | 0.79 | 0.18 | 0.75  | 1    | 1.95  |
| 2.5   | 0.75  | 1.8  | 0.04 | 0.03  | 1.59 | 1.08 | 9.45 | 4.28  | 1.89 | 0.37  |
| 15.09 | 1.99  | 2.12 | 0.52 | 2.38  | 0.95 | 6.8  | 1.18 | 6.39  | 0.9  | 1.21  |
| 2     | 0.65  | 1.14 | 1.75 | 1.01  | 0.75 | 1.12 | 3.08 | 0.75  | 1.88 | 0.96  |
| 0.22  | 1.08  | 2.01 | 3.89 | 1.67  | 0.75 | 0.71 | 5    | 7.78  | 0.3  | 2.67  |
| 0.66  | 2.73  | 3.28 | 2.46 | 2.15  | 0.79 | 0.6  | 1.45 | 1.81  | 0.16 | 0.77  |
| 1.79  | 1.39  | 1.1  | 2.49 | 1.32  | 1.07 | 2.03 | 3.78 | 0.49  | 0.31 | 2.05  |
| 1.14  | 1.51  | 3    | 3.5  | 0.64  | 1.54 | 1.27 | 1.5  | 0.9   | 0.73 | 1.29  |

|       |       |      |      |       |      |       |      |       |      |      |
|-------|-------|------|------|-------|------|-------|------|-------|------|------|
| 0.5   | 1.05  | 0.87 | 2.23 | 0.47  | 6.88 | 1.29  | 1.43 | 2.18  | 0.75 | 0.65 |
| 3.67  | 1.26  | 0.98 | 1    | 1.19  | 1.2  | 0.73  | 1.85 | 46.18 | 2.1  | 2.74 |
| 2.25  | 1.83  | 5.94 | 0.5  | 1.57  | 1.95 | 1.22  | 1    | 0.86  | 0.83 | 1    |
| 1.4   | 2.15  | 0.73 | 6.78 | 12.86 | 3.33 | 19.01 | 2.17 | 3.14  | 3.25 | 3.03 |
| 1.4   | 1.65  | 3.53 | 1.18 | 2.21  | 0.75 | 1.19  | 0.8  | 1.16  | 1.91 | 0.96 |
| 1.57  | 0.95  | 0.95 | 1.28 | 1.04  | 5.68 | 0.94  | 1.05 | 1.1   | 4.6  | 1.69 |
| 3.38  | 0.8   | 1.12 | 0.69 | 0.22  | 1.97 | 0.24  | 2.63 | 0.8   | 1.64 | 0.25 |
| 0.3   | 0.97  | 2.44 | 1.37 | 1.78  | 2.81 | 1.79  | 1.1  | 0.69  | 1.94 | 1.14 |
| 0.44  | 1.57  | 0.56 | 1.82 | 1.31  | 1.38 | 1.97  | 1.67 | 0.38  | 1.16 | 3.76 |
| 0.52  | 0.77  | 1.22 | 1.6  | 2.02  | 1.11 | 1.68  | 0.77 | 1.72  | 1.49 | 1.08 |
| 6.88  | 2.63  | 1.22 | 0.5  | 0.85  | 5.01 | 0.83  | 1.01 | 1.79  | 5.33 | 2.46 |
| 0.18  | 0.8   | 1.54 | 0.89 | 1.32  | 1.25 | 10.85 | 0.89 | 0.14  | 1.21 | 1.17 |
| 1     | 0.65  | 0.62 | 2.1  | 1.19  | 1    | 2.45  | 0.59 | 2.94  | 1.3  | 0.7  |
| 1.72  | 1.39  | 1.86 | 1.18 | 1.08  | 2.28 | 1     | 2.2  | 3.84  | 0.78 | 0.94 |
| 9.5   | 1.07  | 5.83 | 0.72 | 1.46  | 1.33 | 2.14  | 4.89 | 0.19  | 0.14 | 1.27 |
| 0.03  | 1.97  | 0.7  | 0.31 | 0.21  | 0.01 | 21.52 | 0.1  | 0.97  | 0.05 | 13.1 |
| 0.8   | 1.58  | 2.55 | 0.86 | 1.02  | 0.72 | 0.4   | 1.68 | 12.89 | 0.63 | 0.3  |
| 0.4   | 0.54  | 1.41 | 1.34 | 0.8   | 0.25 | 0.91  | 0.35 | 0.74  | 0.29 | 3.62 |
| 1.16  | 1.47  | 1.83 | 1.48 | 4.75  | 2.26 | 1.39  | 0.36 | 0.83  | 1.78 | 0.82 |
| 2.61  | 2.55  | 1.15 | 1.62 | 1.14  | 1.71 | 0.85  | 7.86 | 3.94  | 3.14 | 0.76 |
| 0.06  | 1.71  | 0.77 | 2.85 | 0.64  | 0.96 | 309.1 | 2.01 | 0.97  | 0.95 | 0.72 |
| 1.9   | 0.49  | 1.11 | 1.65 | 0.38  | 0.57 | 4.15  | 1.8  | 2.51  | 1.85 | 1.1  |
| 3.5   | 1.46  | 0.77 | 1.46 | 1.21  | 3.75 | 1     | 2.29 | 0.36  | 0.7  | 0.4  |
| 10.64 | 1.43  | 1.29 | 1.36 | 2.45  | 2.07 | 0.84  | 0.69 | 1.08  | 1.19 | 4.9  |
| 6.01  | 0.79  | 1.04 | 0.63 | 2.12  | 0.53 | 0.93  | 0.77 | 1.17  | 0.71 | 3.85 |
| 1     | 0.99  | 2.47 | 0.84 | 1.39  | 0.59 | 1.07  | 0.44 | 1.04  | 0.35 | 1.14 |
| 4.28  | 0.91  | 2.89 | 0.59 | 0.89  | 0.36 | 0.83  | 1.15 | 1.98  | 3.03 | 0.64 |
| 0.6   | 0.88  | 0.98 | 0.36 | 2.29  | 0.32 | 0.82  | 1.69 | 1.02  | 2.89 | 1.85 |
| 0.58  | 1.22  | 1.61 | 1.05 | 0.81  | 1.4  | 0.86  | 0.85 | 1.07  | 2.05 | 0.79 |
| 0.91  | 0.71  | 0.83 | 0.89 | 2.01  | 0.81 | 0.9   | 1.49 | 1.19  | 0.38 | 0.84 |
| 1.27  | 1.14  | 2.29 | 0.79 | 1.28  | 3.69 | 0.79  | 0.8  | 0.87  | 0.77 | 0.92 |
| 1.5   | 0.66  | 0.49 | 1.8  | 0.67  | 2.04 | 0.88  | 1.05 | 0.91  | 1.21 | 0.33 |
| 0.62  | 18.58 | 2.21 | 8.86 | 3.48  | 0.38 | 2.41  | 0.48 | 0.52  | 0.9  | 0.79 |

|       |      |      |       |      |      |       |      |       |      |      |
|-------|------|------|-------|------|------|-------|------|-------|------|------|
| 1.12  | 1.46 | 1.61 | 8.02  | 0.88 | 2.64 | 0.9   | 1.85 | 1.99  | 1.22 | 0.48 |
| 0.67  | 0.69 | 0.82 | 0.2   | 1.57 | 2.35 | 0.86  | 1.5  | 0.61  | 5.85 | 0.83 |
| 1.11  | 1.13 | 2.91 | 0.65  | 1.81 | 7.3  | 1.17  | 2.45 | 2.19  | 0.97 | 1.03 |
| 2.22  | 1.16 | 3.38 | 0.41  | 1.02 | 0.92 | 0.84  | 1.01 | 3.2   | 0.38 | 4.54 |
| 1.45  | 0.83 | 1.36 | 1.15  | 1.28 | 4.08 | 0.97  | 2.16 | 1.38  | 1.07 | 1.14 |
| 0.88  | 0.16 | 0.79 | 0.5   | 1    | 4.29 | 1.2   | 1.44 | 5.28  | 2.29 | 0.71 |
| 1.64  | 1.05 | 1.63 | 0.79  | 1.2  | 1.45 | 0.85  | 2.1  | 3.7   | 1.86 | 0.8  |
| 0.56  | 1.68 | 1.34 | 5.44  | 1.25 | 0.19 | 1.97  | 1.09 | 1.87  | 0.84 | 1.47 |
| 1.47  | 0.78 | 1.9  | 0.84  | 0.51 | 4.53 | 1.63  | 1.6  | 1.88  | 1.73 | 1.25 |
| 1.96  | 0.59 | 0.92 | 1.26  | 1.41 | 0.99 | 0.17  | 2.02 | 4.77  | 0.51 | 0.76 |
| 14.89 | 0.89 | 1.5  | 0.57  | 1.52 | 1.55 | 1.06  | 1.82 | 1.08  | 0.56 | 0.92 |
| 0.87  | 1.09 | 2.24 | 0.73  | 1.08 | 3.26 | 1.1   | 1.04 | 1.25  | 0.57 | 1.43 |
| 1.88  | 0.52 | 2.38 | 0.93  | 4.13 | 0.44 | 0.96  | 2.44 | 2.76  | 1.88 | 2.25 |
| 1.47  | 0.6  | 2.61 | 0.65  | 4.31 | 3.11 | 0.81  | 1.18 | 0.88  | 0.74 | 9.25 |
| 0.64  | 1.09 | 1.18 | 2.97  | 0.78 | 2.11 | 5     | 1    | 1.01  | 1    | 1.06 |
| 3.91  | 1.75 | 1.09 | 1.05  | 1.57 | 7.26 | 1.18  | 0.98 | 9.57  | 4.5  | 1.26 |
| 0.29  | 1.76 | 3.28 | Inf   | 7.62 | 0.59 | 1.76  | 0.62 | 7.94  | 0.79 | 1.39 |
| 1.18  | 1.93 | 0.62 | 5.6   | 4.88 | 2.67 | 13.58 | 1.2  | 3.82  | 2.35 | 1.98 |
| 0.89  | 1.19 | 2.74 | 0.68  | 1.05 | 0.93 | 2.27  | 1.8  | 6.75  | 1.15 | 0.74 |
| 1.67  | 1.61 | 2.26 | 2.6   | 10   | 1.74 | 1.3   | 4.88 | 0.34  | 1.65 | 0.3  |
| 0.68  | 1.31 | 1.36 | 0.33  | 0.18 | 4.75 | 1.47  | 1.64 | 2.29  | 1.09 | 0.36 |
| 0.84  | 1.49 | 1.14 | 0.2   | 0.84 | 5.13 | 1.41  | 0.65 | 1.26  | 2.5  | 0.54 |
| 2.02  | 1.08 | 1.6  | 0.78  | 1.01 | 2.49 | 1.09  | 1.25 | 0.71  | 0.94 | 1.45 |
| 1.12  | 1.59 | 0.78 | 0.59  | 0.88 | 1.5  | 1.09  | 3.02 | 4.03  | 0.59 | 0.48 |
| 1.6   | 0.35 | 0.62 | 1.51  | 5.57 | 1.19 | 0.64  | 1.62 | 0.97  | 1.41 | 1.07 |
| 0.96  | 0.55 | 0.85 | 1.74  | 0.17 | 0.8  | 0.73  | 1.42 | 0.47  | 3.28 | 1.09 |
| 3.5   | 0.62 | 3.22 | 0.89  | 1.18 | 1.33 | 1.11  | 1    | 1.05  | 0.33 | 1.2  |
| 1.08  | 1.07 | 1.13 | 2.54  | 1.54 | 1.42 | 1.83  | 0.45 | 1.19  | 3.83 | 1.33 |
| 1.58  | 0.79 | 0.82 | 0.2   | 0.49 | 2.76 | 0.85  | 2.13 | 0.77  | 0.67 | 0.55 |
| 0.65  | 1    | 1.08 | 1.74  | 1.09 | 1.76 | 1.03  | 3.59 | 1.38  | 1.15 | 1.21 |
| 1.75  | 0.13 | 1.96 | 12.19 | 1.15 | 0.43 | 0.82  | 0.44 | 0.69  | 0.7  | 0.13 |
| 3.67  | 1.26 | 0.98 | 1     | 1.19 | 1.2  | 0.73  | 1.85 | 46.18 | 2.1  | 2.74 |
| 1     | 0.92 | 1.09 | 0.81  | 2.8  | 0.11 | 0.82  | 0.65 | 3.18  | 0.4  | 1.84 |

|      |      |      |       |       |      |       |      |      |      |      |
|------|------|------|-------|-------|------|-------|------|------|------|------|
| 0.6  | 0.79 | 1.89 | 0.85  | 0.69  | 0.23 | 2.59  | 0.95 | 1.15 | 1.88 | 1.16 |
| 1.34 | 0.98 | 1.54 | 0.86  | 0.81  | 1.24 | 1.64  | 4.31 | 3.6  | 2.78 | 1.21 |
| 1.32 | 0.95 | 0.96 | 1.03  | 0.82  | 2.38 | 1.4   | 2.7  | 0.9  | 2.87 | 1.01 |
| 1.39 | 1.96 | 0.95 | 0.9   | 0.83  | 1.61 | 2.43  | 0.62 | 1.66 | 6.7  | 1.39 |
| 1.67 | 0.34 | 1.15 | 1.45  | 0.62  | 0.75 | 0.83  | 0.89 | 1.23 | 3.78 | 0.68 |
| 0.29 | 0.98 | 0.67 | 0.77  | 0.85  | 1.06 | 0.96  | 0.93 | 1.09 | 0.5  | 1.05 |
| 0.46 | 0.96 | 5.77 | 0.9   | 0.71  | 0.7  | 2.62  | 1.16 | 0.17 | 1.38 | 1.02 |
| 4.38 | 1.57 | 1    | 1.32  | 1.68  | 2.6  | 0.82  | 0.91 | 0.78 | 0.51 | 0.92 |
| 0.92 | 0.96 | 1.14 | 17.85 | 14.12 | 0.88 | 0.97  | 3.76 | 1.52 | 7.61 | 1.38 |
| 2    | 0.76 | 1.31 | 0.39  | 2.02  | 7.2  | 2.48  | 1.75 | 0.52 | 0.42 | 1.04 |
| 6.81 | 0.83 | 2.2  | 0.6   | 2.14  | 0.96 | 1.44  | 0.31 | 3.33 | 4.41 | 3.18 |
| 2.84 | 1.27 | 1    | 0.08  | 0.96  | 0.92 | 1.16  | 2.61 | 1.28 | 0.89 | 1.23 |
| 0.77 | 1.66 | 0.73 | 6.23  | 9.13  | 3.58 | 13.34 | 1    | 3.71 | 2.37 | 2.78 |
| 1.46 | 1.2  | 1.3  | 1.38  | 7.53  | 1.29 | 0.85  | 1.4  | 0.47 | 3.41 | 1.23 |
| 0.52 | 0.98 | 0.64 | 0.82  | 1.07  | 1.93 | 2.02  | 0.52 | 0.59 | 0.5  | 1.21 |
| 1.1  | 1.09 | 3    | 0.95  | 1.31  | 2.87 | 0.94  | 0.75 | 1.19 | 0.53 | 1.28 |
| 1.73 | 1.06 | 1.43 | 1.17  | 0.95  | 1.01 | 3.55  | 1.11 | 1.02 | 1.75 | 0.94 |
| 2.24 | 1.17 | 1.46 | 0.44  | 2.02  | 1.61 | 0.71  | 2.44 | 1.27 | 3.29 | 0.98 |
| 0.81 | 0.88 | 0.79 | 0.74  | 0.94  | 0.85 | 0.87  | 0.92 | 0.47 | 1.16 | 1.29 |
| 1.87 | 1.07 | 1.09 | 0.68  | 0.47  | 5.46 | 0.75  | 1.1  | 1.04 | 1.51 | 3.55 |
| 0.35 | 0.58 | 0.89 | 1.47  | 2.98  | 8    | 1.5   | 1.34 | 1.06 | 1.44 | 1.27 |
| 3.37 | 1.53 | 3    | 0.16  | 2.09  | 5.56 | 1.36  | 1.28 | 1.54 | 6.15 | 2.1  |
| 0.58 | 2.24 | 1.18 | 0.79  | 1.09  | 2.84 | 0.86  | 1.82 | 2.25 | 3.52 | 1.52 |
| 0.83 | 4.29 | 1.05 | 0.88  | 4.15  | 1.17 | 0.33  | 0.75 | 0.14 | 3.42 | 0.93 |
| 0.67 | 0.75 | 0.96 | 1.09  | 0.2   | 0.58 | 1.2   | 0.76 | 1.18 | 0.61 | 0.56 |
| 1.14 | 1.14 | 3.74 | 1.81  | 1.42  | 1.46 | 0.85  | 1.61 | 1.09 | 1.56 | 1.98 |
| 1.39 | 1.47 | 1.45 | 0.98  | 1.46  | 0.69 | 1.56  | 0.53 | 1.04 | 0.46 | 2.75 |
| 0.37 | 0.92 | 9.2  | 0.93  | 1.76  | 3.47 | 1.14  | 0.22 | 0.5  | 0.91 | 1.51 |
| 0.76 | 1.27 | 1.34 | 0.87  | 0.63  | 0.66 | 1.16  | 2.59 | 1.1  | 3.28 | 0.97 |
| 0.8  | 0.89 | 1.02 | 0.71  | 0.57  | 0.61 | 0.81  | 1.52 | 0.36 | 0.75 | 0.8  |
| 1.14 | 1.51 | 1.19 | 0.63  | 1.02  | 2.25 | 0.72  | 1.97 | 2.65 | 9.83 | 1.22 |
| 0.75 | 0.92 | 3.31 | 0.98  | 1.48  | 2.83 | NA    | 1.01 | 2.95 | 2.92 | 0.98 |
| 1.33 | 0.57 | 0.64 | 3.75  | 1.31  | 2.19 | 1.32  | 0.78 | 0.39 | 1.14 | 0.94 |

|      |      |      |      |      |      |       |      |      |      |      |
|------|------|------|------|------|------|-------|------|------|------|------|
| 0.25 | 1.07 | 1.16 | 1.29 | 1.09 | 3.19 | 0.86  | 1.96 | 0.25 | 0.67 | 7.1  |
| 1.59 | 0.82 | 1.47 | 0.88 | 1.58 | 1.85 | 0.93  | 1.57 | 2.19 | 4.4  | 1.61 |
| 0.83 | 0.92 | 1.33 | 0.97 | 0.99 | 0.75 | 0.98  | 1.02 | 1.13 | 0.57 | 1.69 |
| 1.22 | 2.04 | 0.65 | 1.41 | 1.04 | 1.27 | 0.63  | 0.93 | 2.31 | 1.77 | 0.99 |
| 2.5  | 0.9  | 0.62 | 0.87 | 2.16 | 1.6  | 2.35  | 6.92 | 1.84 | 0.28 | 1.69 |
| 2.37 | 1.17 | 1.01 | 1.04 | 1.05 | 0.87 | 1.02  | 1.23 | 1.11 | 1.17 | 0.96 |
| 0.89 | 0.93 | 1.1  | 1.04 | 2.62 | 1.64 | 0.72  | 1.12 | 0.28 | 0.91 | 0.63 |
| 1.85 | 1.4  | 1.51 | 0.73 | 1.09 | 1.67 | 0.42  | 1.71 | 0.44 | 0.57 | 1.06 |
| 0.52 | 0.95 | 0.8  | 1.34 | 3.25 | 0.98 | 0.98  | 0.53 | 1.04 | 1.52 | 1.07 |
| 1.04 | 1.05 | 0.96 | 0.92 | 1.28 | 1.83 | 0.55  | 0.96 | 0.21 | 1.36 | 0.78 |
| 2    | 1.17 | 1    | 0.42 | 0.31 | 2    | 1.16  | 1.61 | 0.48 | 11   | 2.53 |
| 0.74 | 1.3  | 0.82 | 0.84 | 1.67 | 1.66 | 1.25  | 1.24 | 0.8  | 5.1  | 1.84 |
| 1.89 | 0.92 | 1.71 | 1.08 | 1.02 | 1.88 | 0.93  | 1.31 | 0.96 | 4.35 | 1.33 |
| 1.4  | 3.94 | 1.21 | 0.21 | 6.3  | 2.16 | 1.06  | 0.89 | 2.83 | 1.51 | 1.04 |
| 1.12 | 1.68 | 0.87 | 0.83 | 0.77 | 1.67 | 1.19  | 1.76 | 1.72 | 5.4  | 2.14 |
| 0.75 | 1.5  | 0.99 | 1.45 | 4.58 | 0.9  | 1.69  | 0.88 | 0.38 | 2.28 | 1.22 |
| 1.67 | 1.1  | 0.86 | 2.32 | 1.01 | 2.57 | 0.87  | 1.27 | 4.03 | 1.07 | 1.12 |
| 1.5  | 0.79 | 0.72 | 1.08 | 0.7  | 1.79 | 1.12  | 2.16 | 2.28 | 6.9  | 0.72 |
| 0.72 | 0.73 | 0.76 | 0.83 | 1.4  | 1.54 | 1     | 2.33 | 1.09 | 2.73 | 0.4  |
| 4.73 | 0.84 | 1.22 | 0.87 | 1    | 1.15 | 1.51  | 5    | 2.16 | 1.29 | 1.05 |
| 3    | 0.87 | 5.27 | 2    | 0.96 | 1.5  | 0.83  | 0.94 | 1.07 | 0.68 | 1.17 |
| 0.28 | 0.77 | 1.09 | 2.83 | 1.82 | 0.68 | 0.02  | 2.77 | 0.35 | 0.93 | 2.07 |
| 1.1  | 3.49 | 0.96 | 1.52 | 2.9  | 0.94 | 1.16  | 0.62 | 1.28 | 0.7  | 1.01 |
| 0.5  | 1.32 | 0.91 | 0.76 | 1.41 | 1.43 | 1.04  | 1.55 | 2.15 | 0.7  | 8.88 |
| 3    | 1.17 | 1.16 | 1.52 | 1.25 | 0.5  | 1.06  | 0.93 | 1.25 | 0.53 | 0.92 |
| 0.74 | 2.36 | 2.52 | 1.13 | 4.54 | 1.81 | 0.83  | 2.39 | 0.02 | 0.7  | 1.13 |
| 0.67 | 1.45 | 6.73 | 0.79 | 0.75 | 0.2  | 1.73  | 1.17 | 1.57 | 0.84 | 0.77 |
| 6.67 | 3.18 | 1.86 | 0.53 | 1.24 | 1.53 | 1     | 1.76 | 1.24 | 1.38 | 1.39 |
| 1.39 | 1.07 | 1.03 | 1.06 | 5.66 | 0.97 | 5.14  | 0.87 | 3.24 | 0.97 | 0.94 |
| 0.59 | 1.81 | 0.28 | Inf  | 2.31 | 0.56 | 1.44  | 0.81 | 6.31 | 0.88 | 0.97 |
| 0.89 | 0.84 | 2.46 | 1.02 | 1.6  | 1.87 | 1.4   | 0.84 | 1.27 | 2.17 | 0.34 |
| 0.5  | 0.76 | 0.61 | 0.6  | 0.57 | 2    | 1.18  | 0.66 | 1.4  | 0.18 | 0.77 |
| 1.33 | 1.32 | 2.98 | 0.8  | 1.32 | 2.91 | 18.14 | 1.09 | 1.2  | 3.79 | 0.35 |



|         |      |      |      |      |       |      |      |      |      |        |
|---------|------|------|------|------|-------|------|------|------|------|--------|
| 7065.75 | 0.83 | 0.7  | 0.91 | 0.85 | 1.29  | 0.85 | 1.41 | 0.62 | 2.08 | 0.72   |
| 2       | 0.93 | 0.71 | 0.99 | 2.25 | 0.26  | 0.36 | 0.67 | 4.3  | 5.67 | 1.16   |
| 2.28    | 1.5  | 2.45 | 0.26 | 1.54 | 4.78  | 1.21 | 0.81 | 1.53 | 2.81 | 1.07   |
| 0.52    | 2.27 | 1.56 | 3.38 | 0.67 | 0.47  | 0.96 | 2.05 | 1.06 | 1.26 | 1.26   |
| 3.01    | 1.41 | 1.09 | 2.41 | 2.01 | 2.01  | 0.79 | 0.84 | 2.16 | 1.13 | 1.88   |
| 0.71    | 0.96 | 0.88 | 1.33 | 1    | 0.55  | 3.89 | 0.45 | 0.85 | 1.06 | 0.99   |
| 1.15    | 1.25 | 0.48 | 0.96 | 0.4  | 0.58  | 0.99 | 0.77 | 1.38 | 0.3  | 1.34   |
| 0.46    | 1.55 | 3.14 | 0.2  | 0.57 | 7.86  | 1.26 | 0.65 | 1.37 | 1.59 | 1.08   |
| 0.64    | 0.69 | 1.03 | 0.97 | 1.16 | 2.61  | 1.59 | 2.04 | 0.25 | 0.99 | 5.73   |
| 1.31    | 1.48 | 0.49 | 1.37 | 1.53 | 1.39  | 0.65 | 2.26 | 1.23 | 0.77 | 1.46   |
| 0.33    | 1.03 | 1.33 | 1.08 | 1.19 | 0.14  | 1.13 | 0.38 | 2    | 0.3  | 1.13   |
| 0.33    | 1.1  | 5.27 | 1.39 | 1.37 | 0.6   | 0.71 | 0.57 | 0.4  | 0.88 | 1.28   |
| 1       | 0.29 | 0.43 | 0.46 | 0.58 | 0.5   | 1.73 | 1.5  | 0.34 | 1.12 | 0.86   |
| 1.08    | 0.53 | 0.43 | 4.06 | 3.99 | 0.5   | 1.46 | 0.96 | 0.61 | 0.81 | 0.11   |
| 1.25    | 1.91 | 0.67 | 4.96 | 2.25 | 4.81  | 1.57 | 0.77 | 0.77 | 5.97 | 0.83   |
| 1.43    | 0.71 | 2.96 | 0.96 | 0.9  | 0.65  | 0.91 | 1.08 | 0.75 | 2.41 | 1.38   |
| 0.67    | 0.9  | 1.15 | 1.08 | 0.75 | 26    | 1.02 | 0.88 | 1.54 | 0.39 | 0.95   |
| 0.6     | 1.3  | 1.23 | 4.86 | 3.86 | 1.51  | 1.02 | 1.34 | 0.7  | 1.29 | 4.4    |
| 1.29    | 0.96 | 6.79 | 1.18 | 2.62 | 16.58 | 8.51 | 3.65 | 2.14 | 4.33 | 0.61   |
| 0.44    | 3.35 | 0.53 | 4.42 | 5.5  | 1.36  | 0.79 | 1.7  | 0.01 | 2.31 | 101.77 |
| 0.77    | 0.97 | 2.23 | 1.48 | 7.44 | 4.35  | 1.55 | 2.04 | 2.36 | 0.6  | 1.34   |
| 1.48    | 0.99 | 0.81 | 0.85 | 1.23 | 2.31  | 0.62 | 1.15 | 0.31 | 0.96 | 0.62   |
| 0.93    | 0.3  | 1.3  | 0.12 | 1.22 | 1.39  | 0.79 | 4    | 1.56 | 1.79 | 0.31   |
| 1.05    | 0.78 | 1.37 | 1.09 | 0.25 | 2.36  | 0.95 | 1.83 | 0.35 | 1.34 | 0.39   |
| 3.29    | 0.62 | 0.71 | 1.19 | 0.57 | 0.92  | 1.07 | 1.64 | 0.84 | 1.09 | 1.03   |
| 2.61    | 1.06 | 2.16 | 0.79 | 0.63 | 1.85  | 1.5  | 1.78 | 0.88 | 2.21 | 0.57   |
| 0.68    | 1.79 | 1.1  | 0.76 | 0.65 | 1.54  | 0.99 | 2.52 | 2.65 | 0.56 | 0.85   |
| 0.75    | 1.75 | 1.13 | 1.62 | 0.98 | 1.29  | 1.26 | 3.01 | 0.26 | 4.64 | 3.5    |
| 26.91   | 1.12 | 4.43 | 0.59 | 1.55 | 0.82  | 1.54 | 2.38 | 2.01 | 3.24 | 0.54   |
| 0.14    | 1.34 | 0.2  | 1.97 | 5.36 | 0.33  | 3.73 | 0.93 | 0.55 | 1.33 | 1.37   |
| 2       | 0.99 | 2.69 | 1.15 | 0.78 | 1.14  | 0.33 | 0.26 | 3.67 | 0.06 | 0.86   |
| 1.62    | 3.84 | 2.05 | 0.42 | 1.5  | 1.49  | 1.95 | 0.74 | 0.78 | 0.51 | 1.09   |
| 1.26    | 1.58 | 6.11 | 3.11 | 0.3  | 2.83  | 2.06 | 1.1  | 0.71 | 0.27 | 1.03   |

|      |       |      |       |      |      |      |      |      |      |      |
|------|-------|------|-------|------|------|------|------|------|------|------|
| 0.33 | 0.84  | 0.73 | 1.05  | 0.84 | 0.97 | 1    | 1.19 | 0.56 | 1.11 | 1.17 |
| 1.33 | 1.33  | 1.25 | 1.89  | 1.44 | 1.58 | 1.04 | 0.84 | 1.04 | 0.5  | 1.24 |
| 2    | 2.67  | 3.18 | 10.28 | 1.47 | 0.63 | 6.51 | 1.69 | 0.32 | 2.5  | 1.29 |
| 3.46 | 0.68  | 0.52 | 0.46  | 0.55 | 1.04 | 0.54 | 0.67 | 6.15 | 6.25 | 0.51 |
| 1.07 | 0.89  | 0.56 | 0.17  | 0.71 | 3.32 | 0.89 | 1    | 2.02 | 4.49 | 0.31 |
| 1.13 | 1.31  | 0.75 | 1.16  | 0.76 | 1.89 | 2.25 | 3.12 | 3.36 | 1.44 | 0.79 |
| 1.54 | 1.09  | 0.93 | 0.86  | 0.9  | 1.52 | 1.12 | 1.47 | 1.31 | 3.23 | 1.18 |
| 1.33 | 0.71  | 1.07 | 0.79  | 0.97 | 0.69 | 0.8  | 0.62 | 6.73 | 3.66 | 1.46 |
| 1.5  | 0.58  | 0.64 | 1.28  | 1.22 | 1.18 | 1.82 | 0.56 | 1.16 | 0.85 | 2.76 |
| 3.38 | 1.7   | 1.42 | 0.96  | 3.92 | 2.02 | 0.89 | 4.09 | 1.78 | 1.9  | 1.31 |
| 7    | 1.04  | 1.81 | 0.33  | 0.99 | 2.74 | 1.8  | 1.62 | 3.44 | 1.57 | 1.28 |
| 1.19 | 46.26 | 0.31 | 13.11 | 10.6 | 0.95 | 0.16 | 0.72 | 0.59 | 2.12 | 0.48 |
| 0.61 | 0.87  | 4.01 | 3.19  | 1.31 | 1.38 | 0.93 | 0.89 | 0.7  | 0.51 | 0.97 |
| 7    | 1.84  | 0.43 | 1.49  | 1.42 | 0.11 | 0.33 | 1.2  | 3    | 1.35 | 0.41 |

| 207397_s_at | 210973_s_at | 213844_at | 207965_at | 212983_at | 213721_at | 206044_s_at | 207233_s_at | 201839_s_at | 212983_at | 219480_at |
|-------------|-------------|-----------|-----------|-----------|-----------|-------------|-------------|-------------|-----------|-----------|
| 2.89        | 0.96        | 0.4       | 0.87      | 1.29      | 1.69      | 1.57        | 0.86        | 0.19        | 1.29      | 1.93      |
| 1.11        | 1.91        | 0.97      | 1.75      | 0.97      | 0.84      | 0.91        | 1.35        | 1.76        | 0.97      | 1.49      |
| 1.72        | 1.41        | 1.99      | 1.24      | 1.51      | 3.91      | 1.28        | 2.37        | 2.6         | 1.51      | 0.99      |
| 3.03        | 1.53        | 1.46      | 3.15      | 1.07      | 2.09      | 1.23        | 1.07        | 0.88        | 1.07      | 3.82      |
| 1.19        | 0.73        | 0.73      | 2.32      | 0.88      | 2.75      | 0.93        | 0.65        | 2.29        | 0.88      | 0.51      |
| 1.24        | 1.79        | 1.79      | 4.07      | 0.83      | 1.25      | 1.54        | 3.28        | 1.51        | 0.83      | 1.05      |
| 1           | 0.44        | 0.67      | 1.37      | 2.06      | 2.13      | 1.07        | 0.35        | 0.04        | 2.06      | 2.33      |
| 0.62        | 4.14        | 1.47      | 3.8       | 1.04      | 0.87      | 0.9         | 0.74        | 1.19        | 1.04      | 1.75      |
| 1.87        | 1.45        | 1.39      | 1.82      | 1.1       | 0.33      | 1.29        | 1.54        | 1.58        | 1.1       | 1.07      |
| 13.89       | 1.21        | 0.66      | 0.77      | 1         | 1.27      | 0.69        | 0.96        | 0.8         | 1         | 10.32     |
| 0.72        | 1.06        | 2.8       | 0.29      | 0.91      | 1.03      | 1.14        | 1.59        | 0.25        | 0.91      | 1.06      |
| 1.03        | 0.98        | 0.91      | 1.69      | 1.44      | 1.52      | 1.24        | 1.62        | 0.88        | 1.44      | 1.49      |
| 0.97        | 0.95        | 1.34      | 0.41      | 1.18      | 0.88      | 0.92        | 1.49        | 1           | 1.18      | 1.06      |
| 7.67        | 3.62        | 27.85     | 6.5       | 0.74      | 60.13     | 10.29       | 7.91        | 0.01        | 0.74      | 0.68      |
| 3.83        | 1.47        | 1.59      | 1.53      | 0.96      | 0.66      | 1.35        | 0.71        | 1.15        | 0.96      | 1.06      |
| 1.51        | 1.57        | 0.96      | 5.81      | 0.99      | 2.16      | 1.14        | 0.69        | 1.38        | 0.99      | 1.1       |
| 1.56        | 1.47        | 1.17      | 1.49      | 1.13      | 1.77      | 0.73        | 0.93        | 0.77        | 1.13      | 0.6       |
| 4.82        | 2.06        | 1.15      | 2.06      | 1.07      | 3.17      | 2.04        | 1.45        | 2.65        | 1.07      | 3.94      |
| 0.33        | 0.27        | 1.1       | 0.22      | 1.88      | 2.73      | 1.54        | 0.94        | 0.93        | 1.88      | 1.31      |
| 5.06        | 1.97        | 1.91      | 2.18      | 1.24      | 1.7       | 0.84        | 2.85        | 0.56        | 1.24      | 4.67      |
| 0.52        | 1.01        | 1.33      | 2.68      | 2.52      | 0.83      | 0.65        | 1.38        | 0.47        | 2.52      | 0.83      |
| Inf         | 14.89       | 0.54      | 7.75      | 0.92      | 4.55      | 2.69        | 0.74        | 0.66        | 0.92      | 9.25      |
| 5.67        | 0.97        | 0.77      | 2.37      | 0.95      | 1.13      | 0.85        | 0.89        | 1.09        | 0.95      | 0.84      |
| 2.2         | 7.64        | 1.24      | 2         | 0.71      | 4.57      | 0.73        | 0.82        | 0.01        | 0.71      | 1.05      |
| 0.35        | 0.63        | 0.11      | 3.26      | 0.84      | 0.11      | 0.61        | 0.48        | 0.01        | 0.84      | 2.05      |
| 0.03        | 1.23        | 2.14      | 0.51      | 0.84      | 0.63      | 1.13        | 1.07        | 0.97        | 0.84      | 2.99      |
| 1.05        | 0.72        | 0.82      | 4.12      | 0.98      | 2.91      | 1.05        | 1.07        | 3.85        | 0.98      | 0.27      |
| 1.94        | 6.16        | 3.68      | 8.59      | 0.61      | 1.54      | 2.16        | 1.01        | 0.36        | 0.61      | 7.43      |
| 1.01        | 1.84        | 0.5       | 2.12      | 1.34      | 1.23      | 1.14        | 4.13        | 8.05        | 1.34      | 1.56      |
| 29.34       | 1.25        | 0.94      | 4.08      | 1.28      | 1.18      | 1.23        | 1.4         | 0.85        | 1.28      | 8.23      |

|       |       |       |       |       |       |       |       |       |       |      |
|-------|-------|-------|-------|-------|-------|-------|-------|-------|-------|------|
| 2.17  | 25.57 | 0.34  | 3.75  | 1.54  | 3.01  | 1.35  | 0.84  | 0.89  | 1.54  | 3.57 |
| 10.77 | 0.39  | 23.15 | 0.33  | 1.69  | 0.43  | 2.16  | 4.22  | 1.6   | 1.69  | 1.3  |
| 1.15  | 1.93  | 1.55  | 22    | 1.11  | 5.77  | 1.67  | 0.95  | 0.94  | 1.11  | 1.31 |
| 2.43  | 0.91  | 0.51  | 5.84  | 21.77 | 1.45  | 1.27  | 0.54  | 9.39  | 21.77 | 4.38 |
| 0.57  | 0.79  | 2.03  | 1     | 1.9   | 16.17 | 1.84  | 0.77  | 1.18  | 1.9   | 6.76 |
| 3.62  | 5.09  | 1.24  | 19.92 | 2.45  | 7.59  | 12.81 | 0.43  | 1.75  | 2.45  | 6.79 |
| 1.23  | 1.21  | 3.87  | 5.81  | 0.47  | 1.75  | 36.97 | 10.83 | 3.68  | 0.47  | 1.99 |
| 0.67  | 0.9   | 0.94  | 3     | 1.01  | 0.78  | 1.12  | 1.5   | 10.58 | 1.01  | 1.22 |
| Inf   | 1.95  | 0.67  | 0.86  | 10.21 | 3.18  | 1.1   | 1.23  | 0.93  | 10.21 | 2.9  |
| 2     | 5.66  | 0.5   | 0.75  | 0.74  | 0.17  | 0.59  | 2.44  | 0.42  | 0.74  | 9.96 |
| 11.4  | 1.49  | 0.85  | 2.55  | 1.72  | 1.1   | 0.9   | 0.84  | 2.38  | 1.72  | 0.88 |
| 6     | 1.34  | 0.31  | 8.16  | 1.04  | 0.58  | 1.23  | 0.82  | 0.9   | 1.04  | 1.37 |
| 0.83  | 0.97  | 0.76  | 0.35  | 8.05  | 0.93  | 1.17  | 1.24  | 2.27  | 8.05  | 1.19 |
| 9     | 0.28  | 0.59  | 0.95  | 1.74  | 5.62  | 1.87  | 1.16  | 2.09  | 1.74  | 1.3  |
| 1     | 0.93  | 0.78  | 0.42  | 5.64  | 1.44  | 1.16  | 1.11  | 2.17  | 5.64  | 0.89 |
| 2.04  | 1.8   | 1.05  | 3.44  | 1.01  | 1     | 1.02  | 0.89  | 11.21 | 1.01  | 2.6  |
| 0.5   | 0.55  | 1.14  | 2.25  | 1.14  | 1.4   | 0.42  | 1.37  | 1.03  | 1.14  | 0.43 |
| 5.11  | 1.39  | 0.79  | 3.15  | 0.96  | 5.15  | 1.1   | 1.01  | 3.32  | 0.96  | 1.45 |
| 0.76  | 1.15  | 1.05  | 0.66  | 1.06  | 0.83  | 1.06  | 1.26  | 0.96  | 1.06  | 2.69 |
| 3.13  | 1.29  | 0.54  | 2.47  | 1.13  | 0.83  | 0.6   | 0.91  | 3.38  | 1.13  | 6.3  |
| 1     | 0.54  | 1.12  | 1.75  | 0.85  | 0.48  | 0.69  | 0.86  | 1.08  | 0.85  | 0.28 |
| 0.87  | 0.92  | 1.37  | 2.76  | 1.07  | 5.55  | 0.9   | 0.61  | 0.96  | 1.07  | 0.69 |
| 2.23  | 0.93  | 2.78  | 1.64  | 0.97  | 0.75  | 0.76  | 1.4   | 0.96  | 0.97  | 1.51 |
| 0.85  | 1.32  | 2.83  | 2.23  | 1.25  | 0.91  | 1.07  | 2.08  | 0.97  | 1.25  | 2.19 |
| 1.38  | 0.36  | 0.19  | 0.97  | 4.5   | 1.15  | 0.98  | 0.51  | 1.04  | 4.5   | 1.05 |
| 3     | 1.34  | 1.42  | 0.35  | 1.26  | 1.21  | 1.6   | 0.77  | 4.02  | 1.26  | 1.79 |
| 0.14  | 2.99  | 0.43  | 5.19  | 1.73  | 0.23  | 0.81  | 0.05  | 3.75  | 1.73  | 1.26 |
| 0.25  | 1.05  | 1.46  | 1.61  | 0.73  | 1.59  | 1.5   | 1     | 74.56 | 0.73  | 0.85 |
| 1     | 0.9   | 0.85  | 1.05  | 0.8   | 0.95  | 1.34  | 1.12  | 1.01  | 0.8   | 1.7  |
| 1.5   | 0.85  | 1.21  | 0.37  | 4.35  | 1.25  | 1.42  | 1.29  | 2.38  | 4.35  | 3.39 |
| 2.66  | 1.57  | 1.67  | 1.64  | 1.27  | 0.34  | 0.89  | 2.29  | 1.31  | 1.27  | 2.7  |
| Inf   | 0.52  | 0.82  | 0.76  | 0.73  | 2.01  | 0.64  | 0.86  | 1.2   | 0.73  | 1.31 |
| 0.93  | 0.76  | 1.23  | 0.74  | 0.83  | 0.53  | 1.22  | 0.98  | 7.57  | 0.83  | 0.92 |

|       |      |       |       |      |       |      |      |       |      |       |
|-------|------|-------|-------|------|-------|------|------|-------|------|-------|
| 0.16  | 1.09 | 1.03  | 1.13  | 1.25 | 11.25 | 1.14 | 1.05 | 0.75  | 1.25 | 0.73  |
| 28.88 | 0.75 | 0.8   | 1.68  | 1.51 | 10.14 | 1.02 | 0.77 | 1.17  | 1.51 | 15.06 |
| 0.26  | 0.93 | 1.26  | 1.5   | 0.98 | 1.1   | 0.97 | 3.23 | 0.79  | 0.98 | 5.21  |
| 1.48  | 1.44 | 1.7   | 1.08  | 0.99 | 2.26  | 1.19 | 1.8  | 7.95  | 0.99 | 2.72  |
| 1.09  | 1.37 | 1     | 1.48  | 0.89 | 1.16  | 1.06 | 1.22 | 1.16  | 0.89 | 1.1   |
| 2.65  | 0.41 | 2.14  | 1.5   | 1.38 | 3.38  | 1.06 | 1.62 | 2.3   | 1.38 | 1.75  |
| 1.33  | 1.58 | 2.23  | 2.05  | 1.06 | 0.66  | 1.81 | 2.55 | 0.64  | 1.06 | 0.82  |
| 1.67  | 3.87 | 0.88  | 3.47  | 1.63 | 0.68  | 1.26 | 0.93 | 0.78  | 1.63 | 1.36  |
| 1.63  | 1.23 | 0.73  | 0.72  | 1.36 | 1.42  | 0.74 | 1.34 | 1.82  | 1.36 | 0.42  |
| 0.85  | 0.45 | 1.16  | 2.15  | 0.78 | 1.22  | 0.7  | 1.19 | 1.3   | 0.78 | 0.79  |
| 0.22  | 2.13 | 12.19 | 8.41  | 0.37 | 1.04  | 2.06 | 1.61 | 1.99  | 0.37 | 0.46  |
| 0.63  | 1.31 | 1.15  | 5     | 1.03 | 0.72  | 1.05 | 0.97 | 0.54  | 1.03 | 1.67  |
| 2.75  | 1.56 | 0.84  | 3     | 0.98 | 1.19  | 1.99 | 1.61 | 0.68  | 0.98 | 1.07  |
| 1.78  | 1.11 | 1.53  | 2.76  | 1.11 | 2.85  | 0.87 | 6.96 | 1.06  | 1.11 | 1.64  |
| 1     | 0.27 | 1.32  | 0.57  | 1.88 | 0.12  | 1.04 | 1.12 | 1.07  | 1.88 | 0.23  |
| 0.98  | 0.08 | 0.1   | 0.04  | 2.17 | 0.01  | 0.05 | 1.59 | 1.05  | 2.17 | 0.1   |
| 0.62  | 1.52 | 1.84  | 0.79  | 0.6  | 3.04  | 0.85 | 8.77 | 0.92  | 0.6  | 1.32  |
| 8     | 0.07 | 1.55  | 0.39  | 0.84 | 1.37  | 1.22 | 0.78 | 2.07  | 0.84 | 0.09  |
| 1.3   | 0.88 | 1.11  | 1.83  | 0.85 | 1.25  | 1.22 | 0.92 | 1.26  | 0.85 | 1.72  |
| 3.98  | 2.6  | 3.04  | 13.29 | 1.88 | 1.35  | 1.83 | 1.15 | 1.3   | 1.88 | 3.14  |
| 1.1   | 1.33 | 3.15  | 1.23  | 1.08 | 1.87  | 0.68 | 0.19 | 84.39 | 1.08 | 3.12  |
| 5.07  | 1.12 | 1.19  | 1.97  | 1.24 | 1.19  | 0.91 | 0.88 | 1     | 1.24 | 2.87  |
| 1     | 2.41 | 0.66  | 0.76  | 1.6  | 1.71  | 1.29 | 0.59 | 1.97  | 1.6  | 1.67  |
| 2.53  | 2.46 | 1.16  | 1.24  | 1.52 | 1.87  | 0.85 | 0.79 | 1.11  | 1.52 | 0.91  |
| NA    | 1.26 | 4.49  | 1.31  | 1.14 | 1.25  | 1.3  | 0.7  | 1     | 1.14 | 0.33  |
| 1     | 1.05 | 1.23  | 0.35  | 0.9  | 0.41  | 1.08 | 0.88 | 0.74  | 0.9  | 2.8   |
| 1.34  | 0.98 | 1.01  | 2.17  | 1.17 | 0.94  | 1.1  | 0.76 | 0.82  | 1.17 | 2.58  |
| 2.5   | 0.76 | 0.12  | 4.74  | 1.34 | 0.4   | 0.94 | 0.9  | 0.82  | 1.34 | 3.05  |
| 1.33  | 0.86 | 0.62  | 2.84  | 0.89 | 0.76  | 1.08 | 1.26 | 0.91  | 0.89 | 2.41  |
| 0.78  | 0.6  | 0.82  | 0.8   | 1.07 | 1.2   | 0.8  | 1.03 | 1.05  | 1.07 | 0.84  |
| 1.08  | 1.21 | 1.21  | 1.79  | 1.25 | 1.21  | 1.02 | 1.02 | 1.25  | 1.25 | 8.58  |
| 0.41  | 0.49 | 0.55  | 0.91  | 1.85 | 1.36  | 0.75 | 0.96 | 0.7   | 1.85 | 3.55  |
| 0.75  | 0.98 | 0.91  | 0.25  | 0.91 | 1.74  | 1.14 | 4.02 | 0.83  | 0.91 | 0.47  |

|       |      |      |      |      |       |      |      |      |      |       |
|-------|------|------|------|------|-------|------|------|------|------|-------|
| 1.44  | 1.82 | 2.45 | 3.1  | 0.69 | 1.46  | 1.29 | 1.18 | 1.83 | 0.69 | 1.28  |
| 2.24  | 1.79 | 1.04 | 1.87 | 1.23 | 1.48  | 2.02 | 0.31 | 3.1  | 1.23 | 1.95  |
| 1.5   | 2.5  | 1.27 | 0.66 | 1.26 | 2.27  | 1.2  | 1.49 | 1.01 | 1.26 | 0.58  |
| 1.77  | 1.92 | 0.78 | 1.18 | 1.5  | 2.86  | 0.78 | 1.87 | 1.06 | 1.5  | 1.25  |
| 3.88  | 1.1  | 1.16 | 0.55 | 0.9  | 1.26  | 1.23 | 2.35 | 0.44 | 0.9  | 1.42  |
| 0.79  | 0.4  | 0.45 | 1.81 | 1.74 | 3.17  | 0.7  | 0.36 | 1.06 | 1.74 | 1.15  |
| 1.77  | 1.07 | 0.79 | 2.86 | 1.2  | 0.53  | 2.06 | 1.14 | 1.89 | 1.2  | 1.11  |
| 0.45  | 0.36 | 1.31 | 0.33 | 1.04 | 3.89  | 1.05 | 1.84 | 1.53 | 1.04 | 0.79  |
| 2.7   | 1.26 | 0.94 | 5.25 | 0.73 | 0.44  | 1.04 | 1.2  | 0.65 | 0.73 | 4.65  |
| 1.62  | 1.58 | 4.29 | 1.03 | 0.79 | 1.52  | 1.06 | 1.08 | 0.9  | 0.79 | 1.22  |
| 0.84  | 1.6  | 0.99 | 2.15 | 1.17 | 1.76  | 0.94 | 0.65 | 0.96 | 1.17 | 1.08  |
| 1.17  | 1.65 | 1.07 | 1.29 | 1.04 | 1.72  | 0.98 | 2.43 | 1.04 | 1.04 | 1.58  |
| 9.83  | 1.9  | 1.02 | 2.4  | 1.18 | 0.79  | 2.26 | 1.44 | 1.42 | 1.18 | 1.52  |
| 1.17  | 1.18 | 0.74 | 3.09 | 14.7 | 0.72  | 1.07 | 0.5  | 5.43 | 14.7 | 2.72  |
| 0.56  | 1.48 | 0.58 | 1.09 | 0.9  | 0.48  | 1.22 | 1.11 | 1.56 | 0.9  | 0.91  |
| 1.48  | 1.66 | 4.46 | 3.08 | 1.06 | 1.68  | 0.87 | 0.84 | 1.27 | 1.06 | 0.89  |
| 14    | 1.17 | 0.86 | 0.39 | 0.94 | 0.91  | 0.97 | 2.07 | 0.76 | 0.94 | 0.55  |
| 1.48  | 1.5  | 2.37 | 1.14 | 1.12 | 2.53  | 1.07 | 1.77 | 7.91 | 1.12 | 2.49  |
| 0.83  | 1.3  | 0.95 | 0.99 | 0.85 | 1.48  | 1.13 | 1.65 | 3.19 | 0.85 | 3.79  |
| 0.25  | 0.95 | 1.02 | 2.5  | 1.4  | 0.45  | 1.15 | 0.92 | 1.09 | 1.4  | 8.53  |
| 0.17  | 2.32 | 0.93 | 0.86 | 0.9  | 2.19  | 1.19 | 0.95 | 1.58 | 0.9  | 1.09  |
| 1.02  | 1.55 | 1.05 | 0.72 | 0.96 | 3.25  | 0.9  | 0.48 | 1.38 | 0.96 | 1.25  |
| 1.17  | 1.17 | 0.99 | 1.72 | 0.95 | 1.97  | 0.86 | 1.21 | 1.02 | 0.95 | 1.12  |
| 2     | 1.65 | 0.91 | 0.19 | 0.82 | 0.16  | 0.6  | 0.88 | 0.96 | 0.82 | 1.11  |
| 0.75  | 0.86 | 0.84 | 1.84 | 0.99 | 1.87  | 2.11 | 1.41 | 1.1  | 0.99 | 2.41  |
| 1.53  | 0.67 | 0.7  | 1.63 | 0.8  | 0.78  | 1.41 | 1.27 | 0.89 | 0.8  | 1.27  |
| 0.25  | 1.26 | 0.9  | 0.8  | 1.13 | 0.49  | 1.3  | 1.54 | 1.09 | 1.13 | 1     |
| 1.33  | 1.18 | 0.88 | 0.66 | 0.57 | 1.06  | 0.79 | 0.82 | 0.96 | 0.57 | 0.7   |
| 0.22  | 3.06 | 0.81 | 1.38 | 0.93 | 3.62  | 1.11 | 0.76 | 3.57 | 0.93 | 4.15  |
| 1.85  | 1.92 | 0.67 | 1.04 | 0.94 | 1.49  | 0.87 | 0.89 | 0.74 | 0.94 | 2.55  |
| 0.77  | 0.99 | 0.92 | 2.12 | 1.11 | 0.6   | 1.3  | 1.68 | 1.04 | 1.11 | 1.29  |
| 28.88 | 0.75 | 0.8  | 1.68 | 1.51 | 10.14 | 1.02 | 0.77 | 1.17 | 1.51 | 15.06 |
| 1.5   | 0.85 | 0.74 | 4.25 | 0.9  | 1.54  | 1.02 | 1.42 | 0.96 | 0.9  | 0.18  |

|      |      |      |      |      |      |      |      |      |      |      |
|------|------|------|------|------|------|------|------|------|------|------|
| 1.27 | 1.1  | 0.46 | 2.22 | 1    | 0.98 | 0.78 | 1.15 | 0.85 | 1    | 2.31 |
| 3.11 | 1.22 | 1.12 | 3.5  | 0.92 | 0.74 | 1.17 | 2.19 | 0.95 | 0.92 | 0.53 |
| 5.83 | 1.04 | 0.63 | 4.02 | 1.13 | 4.66 | 1.1  | 1.45 | 0.93 | 1.13 | 1.48 |
| 0.78 | 1.05 | 1.5  | 3.4  | 1.01 | 0.68 | 1.05 | 1.29 | 1.53 | 1.01 | 0.82 |
| 1.13 | 0.87 | 0.81 | 1.3  | 1.04 | 1.23 | 1.22 | 1.34 | 0.67 | 1.04 | 3.58 |
| 1.31 | 0.54 | 1.17 | 9    | 0.92 | 0.44 | 1.14 | 0.78 | 1.25 | 0.92 | 0.86 |
| 0.27 | 0.81 | 0.82 | 4.48 | 0.9  | 4.08 | 0.56 | 0.85 | 1.08 | 0.9  | 1.95 |
| 0.7  | 0.29 | 1.05 | 1.04 | 0.75 | 3.47 | 1.41 | 0.77 | 1.14 | 0.75 | 0.25 |
| 1.97 | 0.72 | 1.96 | 3.57 | 1.01 | 1.2  | 1.71 | 1.81 | 0.55 | 1.01 | 2.44 |
| 0.23 | 1.14 | 1.11 | 1.71 | 1.28 | 0.71 | 0.91 | 3.93 | 1.58 | 1.28 | 5.64 |
| 0.67 | 0.87 | 1.23 | 2.1  | 1.1  | 1.51 | 0.93 | 1.05 | 0.6  | 1.1  | 0.89 |
| 2.66 | 0.87 | 1.13 | 1.71 | 1.26 | 0.62 | 1.06 | 1.35 | 0.89 | 1.26 | 1.99 |
| 1.62 | 1.59 | 1.58 | 1.54 | 1.05 | 1.59 | 1.76 | 1.79 | 8.2  | 1.05 | 1.64 |
| 0.56 | 0.75 | 1.65 | 1.52 | 0.89 | 0.71 | 1.8  | 0.94 | 0.58 | 0.89 | 7.78 |
| 1    | 0.28 | 0.94 | 1.94 | 0.84 | 2.04 | 1.08 | 2.95 | 0.65 | 0.84 | 0.7  |
| 1.03 | 1.3  | 1.05 | 0.93 | 1.05 | 0.66 | 0.97 | 0.89 | 2.07 | 1.05 | 3.95 |
| 2.4  | 0.9  | 0.85 | 1.75 | 1.1  | 5.77 | 1.04 | 1.17 | 0.98 | 1.1  | 1.09 |
| 1.71 | 0.86 | 2.16 | 2.37 | 1.19 | 1.31 | 1    | 1.47 | 2.02 | 1.19 | 3.78 |
| 0.95 | 0.95 | 0.94 | 1.92 | 0.83 | 2.44 | 1.07 | 0.83 | 0.69 | 0.83 | 0.62 |
| 2.44 | 1.17 | 2.12 | 1.11 | 1.07 | 0.73 | 1.08 | 1.77 | 0.96 | 1.07 | 1.16 |
| 2.98 | 1.05 | 1.1  | 1.42 | 1.12 | 0.63 | 0.71 | 0.83 | 0.92 | 1.12 | 4.86 |
| NA   | 2.84 | 0.86 | 1.13 | 0.66 | 3.13 | 1.57 | 0.64 | 1.28 | 0.66 | 6.94 |
| 4.52 | 1.02 | 4.21 | 2.13 | 1.35 | 0.76 | 1.05 | 0.8  | 1.2  | 1.35 | 1.92 |
| 1.38 | 1.3  | 1.44 | 1.94 | 0.92 | 1.6  | 1.04 | 0.7  | 1.16 | 0.92 | 1.11 |
| 0.33 | 1.05 | 0.98 | 1.99 | 2.54 | 0.9  | 1    | 0.93 | 1.31 | 2.54 | 0.92 |
| 1.23 | 0.8  | 0.62 | 3.22 | 1.42 | 2.2  | 0.83 | 1.05 | 0.9  | 1.42 | 0.86 |
| 0.83 | 2.76 | 1.4  | 1.44 | 1.28 | 1.46 | 0.82 | 1.71 | 1.47 | 1.28 | 2.59 |
| 1.06 | 1    | 1.26 | 3.15 | 1.06 | 4.8  | 0.77 | 1.4  | 0.93 | 1.06 | 4.77 |
| 1.22 | 1.05 | 0.79 | 2.83 | 1.03 | 1.01 | 0.98 | 1.23 | 0.85 | 1.03 | 0.45 |
| 1.04 | 1.1  | 0.89 | 2    | 0.98 | 0.98 | 0.93 | 0.93 | 0.3  | 0.98 | 0.74 |
| 0.77 | 1.01 | 0.81 | 2.11 | 1.14 | 0.7  | 1.05 | 1.41 | 1.35 | 1.14 | 2.93 |
| NA   | 1.16 | 0.87 | 2.17 | 1.01 | 2.52 | 0.91 | 1.11 | 1.01 | 1.01 | 0.85 |
| 1.5  | 1.21 | 0.97 | 1.06 | 1.12 | 1.07 | 0.92 | 0.86 | 2.56 | 1.12 | 1    |

|      |       |      |      |      |      |      |      |       |      |      |
|------|-------|------|------|------|------|------|------|-------|------|------|
| 0.57 | 1.27  | 0.84 | 0.83 | 1.86 | 3.06 | 0.66 | 2.05 | 1.61  | 1.86 | 0.76 |
| 3.19 | 0.69  | 0.81 | 2.26 | 1.31 | 0.72 | 0.96 | 1.26 | 1.59  | 1.31 | 1.32 |
| 1    | 1.33  | 0.93 | 0.6  | 1    | 1.1  | 0.98 | 1.1  | 1.42  | 1    | 1.39 |
| 2.62 | 2.02  | 1    | 2.37 | 0.53 | 0.39 | 0.92 | 1.3  | 0.96  | 0.53 | 1.56 |
| 23   | 0.59  | 0.88 | 0.29 | 1.13 | 0.55 | 1.4  | 1.59 | 1.43  | 1.13 | 1.8  |
| 1.76 | 1.12  | 0.9  | 1.25 | 1.08 | 1.25 | 1.11 | 0.89 | 1.76  | 1.08 | 1.03 |
| 3    | 14.96 | 0.24 | 3.37 | 1.55 | 3.3  | 1.36 | 1.07 | 1.03  | 1.55 | 3.79 |
| 0.51 | 0.72  | 1.11 | 0.29 | 0.81 | 0.86 | 0.97 | 0.86 | 1.39  | 0.81 | 1.5  |
| 2    | 1.03  | 1.11 | 1.51 | 0.91 | 0.92 | 0.82 | 1.01 | 2.74  | 0.91 | 1.74 |
| 1.67 | 0.95  | 0.36 | 2.54 | 1.38 | 2.75 | 1.32 | 0.73 | 1.09  | 1.38 | 1.79 |
| 9    | 1.34  | 0.61 | 11   | 1.09 | 1.14 | 1.04 | 0.72 | 0.93  | 1.09 | 1.25 |
| 0.89 | 4.28  | 0.94 | 0.46 | 1.8  | 1.23 | 0.91 | 2.19 | 0.57  | 1.8  | 1.48 |
| 1.11 | 0.95  | 0.82 | 1.13 | 0.9  | 0.43 | 1    | 0.89 | 0.71  | 0.9  | 1.09 |
| 5.25 | 1.61  | 1.73 | 2.3  | 0.86 | 3.57 | 1.4  | 1.69 | 0.66  | 0.86 | 1.76 |
| 0.78 | 1.07  | 1.57 | 0.97 | 0.82 | 0.84 | 1.05 | 1.43 | 2.57  | 0.82 | 0.66 |
| 1.5  | 1.22  | 1.35 | 2.83 | 0.99 | 0.83 | 1.31 | 1.54 | 1.12  | 0.99 | 7.8  |
| 2.76 | 1.06  | 1.9  | 1.27 | 0.96 | 2.7  | 1.09 | 0.93 | 2.18  | 0.96 | 2.27 |
| 8    | 1.15  | 2.55 | 0.9  | 0.91 | 0.77 | 1.06 | 0.83 | 1.04  | 0.91 | 1.6  |
| 0.54 | 1.04  | 1.01 | 1.19 | 0.57 | 1.85 | 1.3  | 0.39 | 2.43  | 0.57 | 2.3  |
| 1.14 | 1.08  | 1.69 | 2.86 | 0.78 | 0.28 | 0.96 | 1.19 | 1.17  | 0.78 | 0.91 |
| 1.38 | 0.87  | 1.2  | 1.68 | 1.02 | 0.83 | 0.45 | 1.23 | 1.15  | 1.02 | 1.58 |
| 0.65 | 1.44  | 2.37 | 3.14 | 2.17 | 1.13 | 0.52 | 1.01 | 16.17 | 2.17 | 2.08 |
| 10   | 0.4   | 0.56 | 0.58 | 1.08 | 2.53 | 1.16 | 4.26 | 0.68  | 1.08 | 0.14 |
| 1.09 | 1.98  | 1.07 | 1.22 | 1.18 | 1.37 | 0.33 | 1.75 | 1.61  | 1.18 | 0.48 |
| 1.88 | 0.67  | 1.13 | 2.73 | 0.98 | 0.62 | 0.84 | 0.95 | 0.79  | 0.98 | 0.93 |
| 1.67 | 0.31  | 0.06 | 0.86 | 0.54 | 0.3  | 0.65 | 3.52 | 20.05 | 0.54 | 1.04 |
| 1.5  | 1.05  | 0.93 | 0.42 | 1    | 1.09 | 1.09 | 1.56 | 0.86  | 1    | 1.29 |
| 4.3  | 4.01  | 1.16 | 0.49 | 1.16 | 0.72 | 0.99 | 1.1  | 1.03  | 1.16 | 4.15 |
| 2.31 | 0.89  | 1.03 | 2.04 | 1.04 | 0.86 | 1    | 1.35 | 1.03  | 1.04 | 1.43 |
| 2.5  | 0.99  | 0.83 | 0.49 | 1.18 | 0.62 | 1.26 | 1.09 | 0.48  | 1.18 | 0.09 |
| 3.7  | 3.29  | 1.68 | 1.87 | 1.51 | 1.71 | 1.14 | 4.99 | 0.86  | 1.51 | 1    |
| 0.5  | 0.88  | 0.87 | 1.25 | 1.02 | 1.04 | 0.65 | 0.7  | 1.11  | 1.02 | 0.25 |
| 1.31 | 1.03  | 1.88 | 1.12 | 0.95 | 0.71 | 1.33 | 3.87 | 1.08  | 0.95 | 1.64 |



|       |       |      |      |      |      |      |      |      |      |      |
|-------|-------|------|------|------|------|------|------|------|------|------|
| 9.25  | 0.92  | 1.18 | 0.43 | 2.12 | 3.33 | 1.06 | 0.99 | 0.23 | 2.12 | 2.42 |
| 1     | 1.03  | 1.42 | 2.5  | 0.85 | 1.92 | 1.76 | 1.03 | 1.01 | 0.85 | 2.43 |
| NA    | 2.27  | 0.7  | 0.77 | 0.95 | 1.24 | 1.83 | 0.66 | 1.21 | 0.95 | 2.91 |
| 0.7   | 0.43  | 0.13 | 2.9  | 0.84 | 0.55 | 0.37 | 2.35 | 0.13 | 0.84 | 0.35 |
| 2.67  | 0.86  | 3    | 4.41 | 1.13 | 2.49 | 0.96 | 1.43 | 0.91 | 1.13 | 2.49 |
| 2.67  | 0.98  | 3.43 | 2.09 | 0.85 | 2.13 | 1.16 | 2.03 | 1.65 | 0.85 | 0.8  |
| 0.73  | 1.06  | 0.51 | 0.5  | 0.93 | 1.08 | 0.7  | 0.66 | 0.66 | 0.93 | 1.69 |
| 1.74  | 1.83  | 1.08 | 0.54 | 1.06 | 1.57 | 0.86 | 1.69 | 1    | 1.06 | 8.56 |
| 0.67  | 0.77  | 0.42 | 0.56 | 1.32 | 2.05 | 0.74 | 1.53 | 1.55 | 1.32 | 1.15 |
| 0.56  | 1.15  | 1.66 | 2.35 | 0.73 | 0.58 | 1.81 | 0.44 | 0.89 | 0.73 | 3.91 |
| 1     | 0.83  | 0.92 | 0.41 | 0.81 | 1.02 | 1.31 | 0.83 | 0.97 | 0.81 | 2.8  |
| 1     | 0.71  | 0.93 | 0.25 | 0.97 | 1.76 | 0.83 | 1.21 | 1.49 | 0.97 | 1    |
| 2     | 1.41  | 1.21 | 0.71 | 0.86 | 0.46 | 0.86 | 1.02 | 1.08 | 0.86 | 1.97 |
| 2.05  | 1.03  | 1.03 | 3.27 | 0.92 | 0.6  | 0.6  | 4.64 | 0.32 | 0.92 | 0.94 |
| 3.33  | 0.78  | 1.5  | 0.5  | 0.75 | 0.67 | 0.94 | 1.16 | 0.91 | 0.75 | 0.52 |
| 0.99  | 0.76  | 1.13 | 1.3  | 0.88 | 1.37 | 1.16 | 0.83 | 0.8  | 0.88 | 1.78 |
| 3     | 0.84  | 2.17 | 0.79 | 0.87 | 1.59 | 0.74 | 1.15 | 0.6  | 0.87 | 0.47 |
| 1.83  | 0.94  | 0.53 | 0.67 | 1.09 | 1.25 | 1.15 | 0.88 | 0.75 | 1.09 | 2.39 |
| 1.13  | 4.94  | 9.83 | 5.97 | 0.92 | 0.65 | 0.69 | 1.31 | 0.67 | 0.92 | 2.72 |
| 0.61  | 2.02  | 2.97 | 1.4  | 0.41 | 0.26 | 0.35 | 2.6  | 0.19 | 0.41 | 0.66 |
| 3.75  | 2.2   | 2.9  | 2.78 | 0.96 | 1.8  | 1.03 | 2.08 | 0.56 | 0.96 | 0.91 |
| 1.5   | 18.57 | 0.4  | 3.33 | 1.45 | 2.73 | 1.34 | 0.67 | 0.92 | 1.45 | 2.57 |
| 2.22  | 3.2   | 0.54 | 1.53 | 1.31 | 1.12 | 0.99 | 0.56 | 2.42 | 1.31 | 2.21 |
| 1.19  | 3.86  | 0.23 | 0.44 | 1.27 | 0.93 | 1.02 | 0.79 | 0.09 | 1.27 | 2.25 |
| 3.03  | 0.65  | 1.03 | 0.4  | 1.11 | 0.68 | 0.94 | 1.02 | 1.15 | 1.11 | 1.58 |
| 2.56  | 1.2   | 0.83 | 1.11 | 1.26 | 1.72 | 0.97 | 0.84 | 0.83 | 1.26 | 8.15 |
| 0.25  | 0.79  | 2.16 | 5.18 | 0.63 | 0.57 | 0.68 | 1.1  | 1.15 | 0.63 | 1.37 |
| 2     | 1.27  | 1.15 | 3.33 | 0.99 | 2.04 | 1.19 | 1.12 | 0.08 | 0.99 | 0.45 |
| 2.13  | 1.03  | 0.91 | 3.16 | 1.47 | 1.02 | 0.9  | 0.68 | 0.53 | 1.47 | 1.32 |
| 12.33 | 0.64  | 1.6  | 0.07 | 1.83 | 1.16 | 0.99 | 0.45 | 1.55 | 1.83 | 0.3  |
| 0.79  | 0.73  | 0.82 | 3.22 | 1.19 | 2.7  | 1.25 | 0.3  | 1.27 | 1.19 | 0.23 |
| 1.11  | 0.69  | 1.21 | 2.53 | 1.48 | 1.17 | 1.01 | 0.73 | 4.53 | 1.48 | 2.57 |
| 2.2   | 6.51  | 2.13 | 0.36 | 1.41 | 4.52 | 1.86 | 0.13 | 50.9 | 1.41 | 5.06 |

|      |      |       |      |      |      |      |      |      |      |      |
|------|------|-------|------|------|------|------|------|------|------|------|
| 0.5  | 1.22 | 0.75  | 2.75 | 1.16 | 1.52 | 0.9  | 1    | 1.7  | 1.16 | 1.12 |
| 0.83 | 4.36 | 1.26  | 0.31 | 1.17 | 0.69 | 0.89 | 0.89 | 0.76 | 1.17 | 2.17 |
| 0.8  | 1.48 | 0.59  | 0.8  | 0.52 | 0.37 | 1.34 | 1.49 | 9.6  | 0.52 | 4.73 |
| 4.41 | 0.66 | 0.51  | 1.74 | 0.85 | 0.62 | 0.79 | 0.95 | 0.93 | 0.85 | 0.25 |
| 1.59 | 0.37 | 1.61  | 2.15 | 0.78 | 1.02 | 1.21 | 1.23 | 3.81 | 0.78 | 1.11 |
| 2.94 | 1.06 | 0.69  | 1.49 | 1.27 | 1.03 | 0.99 | 0.95 | 1.16 | 1.27 | 1.02 |
| 2.76 | 1.3  | 0.96  | 2.12 | 1.1  | 1.15 | 0.79 | 1.03 | 1.01 | 1.1  | 0.92 |
| 1.67 | 0.89 | 1.08  | 0.58 | 1.06 | 1.02 | 0.94 | 1.03 | 2.48 | 1.06 | 0.3  |
| 0.61 | 1.16 | 1.06  | 0.52 | 1.42 | 0.86 | 0.7  | 0.91 | 0.96 | 1.42 | 1.05 |
| 0.67 | 1.88 | 0.89  | 0.79 | 1.07 | 0.83 | 0.98 | 0.61 | 1.31 | 1.07 | 1.26 |
| Inf  | 0.72 | 0.34  | 1.51 | 1.04 | 0.73 | 0.77 | 1.23 | 0.61 | 1.04 | 1.42 |
| 0.9  | 0.11 | 10.97 | 1.09 | 0.44 | 0.8  | 2.35 | 2.87 | 0.63 | 0.44 | 2.47 |
| 2.04 | 0.9  | 1.2   | 2.74 | 1.46 | 1.54 | 0.87 | 1.31 | 0.58 | 1.46 | 4.37 |
| 0.49 | 0.72 | 1.67  | 3.17 | 1.14 | 0.65 | 1.07 | 2.64 | 2.33 | 1.14 | 0.36 |

| 205199_at | 218567_x_at | 212983_at | 219159_s_at | 209952_s_at | 207213_s_at | 201502_s_at | 205547_s_at | 209702_at | 202431_s_at | 201502_s_at |
|-----------|-------------|-----------|-------------|-------------|-------------|-------------|-------------|-----------|-------------|-------------|
| 0.85      | 0.86        | 1.29      | 2.31        | 5.19        | 2.55        | 1.09        | 0.67        | 1.07      | 1.04        | 1.09        |
| 0.8       | 1.03        | 0.97      | 3.32        | 1.3         | 1.05        | 2.23        | 1.27        | 0.72      | 0.41        | 2.23        |
| 1.18      | 1.06        | 1.51      | 0.79        | 2.65        | 0.88        | 0.67        | 1.38        | 1.08      | 1.13        | 0.67        |
| 1.25      | 0.95        | 1.07      | 2.77        | 2.27        | 1.69        | 1.11        | 3.26        | 0.85      | 1.17        | 1.11        |
| 0.72      | 0.76        | 0.88      | 1.74        | 0.94        | 0.65        | 2.56        | 0.45        | 1.02      | 1.22        | 2.56        |
| 1.96      | 0.91        | 0.83      | 0.92        | 1.97        | 1.51        | 0.98        | 1.05        | 1.31      | 735.49      | 0.98        |
| 1.64      | 0.7         | 2.06      | 0.38        | 0.38        | 2           | 1.29        | 1.24        | 1.09      | 0.85        | 1.29        |
| 0.73      | 1.07        | 1.04      | 6           | 1.37        | 0.64        | 1.6         | 0.72        | 1.11      | 1.08        | 1.6         |
| 0.8       | 1.07        | 1.1       | 2.15        | 0.75        | 1.12        | 1.32        | 0.32        | 1.1       | 0.82        | 1.32        |
| 0.86      | 0.62        | 1         | 1.03        | 1.9         | 0.55        | 2.58        | 1.56        | 0.56      | 1.95        | 2.58        |
| 0.72      | 1.01        | 0.91      | 0.71        | 0.37        | 5.5         | 1.16        | 0.65        | 0.9       | 0.89        | 1.16        |
| 1.56      | 1.19        | 1.44      | 8.33        | 0.51        | 2           | 0.58        | 0.13        | 0.95      | 0.97        | 0.58        |
| 0.91      | 1.7         | 1.18      | 0.86        | 1.09        | 1.17        | 0.85        | 1.41        | 1.04      | 1.03        | 0.85        |
| 24.85     | 0.49        | 0.74      | 16.55       | 3.31        | 39.16       | 0.43        | 2.66        | 0.09      | 0.15        | 0.43        |
| 4.31      | 1.11        | 0.96      | 1.91        | 4.07        | 1.88        | 1.02        | 0.72        | 0.97      | 1.71        | 1.02        |
| 0.57      | 0.93        | 0.99      | 2.16        | 0.44        | 0.95        | 1.15        | 2.65        | 0.94      | 0.92        | 1.15        |
| 2.5       | 1.38        | 1.13      | 2.04        | 1.08        | 1.71        | 0.7         | 0.96        | 1.07      | 0.83        | 0.7         |
| 3.24      | 1           | 1.07      | 3.57        | 4.56        | 2.64        | 2.03        | 1.29        | 0.85      | 0.74        | 2.03        |
| 2.12      | 0.91        | 1.88      | 1.4         | 0.08        | 0.5         | 1.4         | 2           | 1.36      | 0.22        | 1.4         |
| 2.95      | 0.69        | 1.24      | 1.99        | 4.46        | 21.99       | 0.54        | 1.73        | 0.83      | 0.74        | 0.54        |
| 0.29      | 0.97        | 2.52      | 0.98        | 7.94        | 1           | 1.22        | 0.69        | 0.81      | 0.49        | 1.22        |
| 10.86     | 1.08        | 0.92      | 11.74       | 2.3         | 18.81       | 3.45        | 0.45        | 0.86      | 0.88        | 3.45        |
| 1.23      | 0.97        | 0.95      | 0.57        | 1.81        | 1.5         | 1.18        | 2           | 1.04      | 1.41        | 1.18        |
| 1.41      | 1.13        | 0.71      | Inf         | 2.5         | 0.89        | 0.35        | 0.31        | 0.99      | 0.75        | 0.35        |
| 1.62      | 0.61        | 0.84      | 3.4         | 2.03        | 0.74        | 2.23        | 8.04        | 0.44      | 6.79        | 2.23        |
| 0.26      | 1.31        | 0.84      | 1.92        | 4.22        | 1.88        | 0.78        | 1.13        | 0.84      | 0.76        | 0.78        |
| 1.31      | 0.78        | 0.98      | 0.74        | 0.97        | 5.5         | 0.42        | 1.97        | 1.02      | 0.76        | 0.42        |
| 2.48      | 1.66        | 0.61      | 77.45       | 2.76        | 15.09       | 4.18        | 0.29        | 1.22      | 1.03        | 4.18        |
| 2         | 0.62        | 1.34      | 1.33        | 2           | 4.07        | 0.54        | 0.46        | 1         | 3.43        | 0.54        |
| 1.52      | 0.96        | 1.28      | 4.2         | 1.45        | 1.6         | 1.47        | 1.03        | 1.2       | 3.16        | 1.47        |

|      |      |       |       |      |       |      |       |      |        |      |
|------|------|-------|-------|------|-------|------|-------|------|--------|------|
| 0.94 | 1.01 | 1.54  | 0.22  | 1.61 | 1.13  | 0.66 | 0.4   | 0.77 | 1.37   | 0.66 |
| 0.97 | 2.3  | 1.69  | 0.65  | 2.36 | 9.99  | 0.93 | 0.61  | 1.94 | 4.73   | 0.93 |
| 0.76 | 0.99 | 1.11  | 1.26  | 1.43 | 1.93  | 0.84 | 1.32  | 1.1  | 0.71   | 0.84 |
| 2.1  | 0.66 | 21.77 | 1.32  | 0.65 | 1.75  | 0.35 | 1.34  | 1.02 | 0.55   | 0.35 |
| 0.92 | 0.61 | 1.9   | 0.26  | 1.43 | 0.7   | 2.61 | 0.16  | 0.45 | 1.69   | 2.61 |
| 2.39 | 1.1  | 2.45  | 2.96  | 4.45 | 4.25  | 0.81 | 8.48  | 0.99 | 1.53   | 0.81 |
| 1.35 | 0.8  | 0.47  | 52.03 | 1.72 | 15.16 | 2.35 | 0.01  | 0.95 | 0.97   | 2.35 |
| 0.87 | 1.08 | 1.01  | 3.5   | 0.68 | 1.17  | 0.71 | 0.97  | 1.03 | 1.17   | 0.71 |
| 1.01 | 0.55 | 10.21 | 0.79  | 1.56 | 1.42  | 3.57 | 0.66  | 0.8  | 0.55   | 3.57 |
| 0.52 | 0.64 | 0.74  | 3     | 0.15 | 1.67  | 1.29 | 5.73  | 1.7  | 0.48   | 1.29 |
| 8.1  | 0.9  | 1.72  | 2.28  | 1.83 | 1.55  | 0.91 | 1.76  | 1.08 | 0.71   | 0.91 |
| 0.51 | 8.09 | 1.04  | 2.02  | 0.71 | 1.64  | 1.24 | 6.33  | 1.16 | 0.47   | 1.24 |
| 0.64 | 1.11 | 8.05  | 15.27 | 4.94 | 0.73  | 3.43 | 6.15  | 0.54 | 0.44   | 3.43 |
| 2.31 | 0.97 | 1.74  | 7.92  | 0.3  | 0.6   | 0.54 | 1.75  | 1.01 | 2.84   | 0.54 |
| 0.94 | 1.18 | 5.64  | 11.81 | 7.75 | 0.69  | 2.85 | 5.3   | 0.65 | 0.6    | 2.85 |
| 3.29 | 1.47 | 1.01  | 1.42  | 0.52 | 7.52  | 2.51 | 0.99  | 0.95 | 1.23   | 2.51 |
| 1.06 | 1.03 | 1.14  | 1.2   | 0.61 | 0.77  | 7.24 | 0.82  | 1.02 | 0.86   | 7.24 |
| 1.45 | 0.89 | 0.96  | 2.2   | 6.38 | 3.54  | 1.45 | 6.89  | 1.34 | 1.38   | 1.45 |
| 2.32 | 0.97 | 1.06  | 0.66  | 5.75 | 1.51  | 0.94 | 0.79  | 6.35 | 0.9    | 0.94 |
| 7.38 | 0.82 | 1.13  | 1.05  | 1.41 | 11.52 | 0.6  | 0.98  | 1.16 | 6.01   | 0.6  |
| 8.8  | 0.81 | 0.85  | 0.25  | 1.08 | 0.27  | 5.73 | 1.43  | 0.96 | 0.74   | 5.73 |
| 1.78 | 0.87 | 1.07  | 1.42  | 2.73 | 0.68  | 0.72 | 0.85  | 1.25 | 5.45   | 0.72 |
| 0.66 | 1.39 | 0.97  | 1.87  | 1.23 | 1.15  | 0.85 | 15.26 | 1.09 | 1.2    | 0.85 |
| 0.96 | 0.85 | 1.25  | 2.53  | 2.6  | 0.85  | 1.21 | 0.87  | 1.04 | 0.64   | 1.21 |
| 1.63 | 1.01 | 4.5   | 29.32 | 1.26 | 0.65  | 1.24 | 0.22  | 0.67 | 1.96   | 1.24 |
| 1.2  | 1.03 | 1.26  | 1.33  | 1.28 | 1.29  | 1.54 | 0.91  | 0.97 | 0.62   | 1.54 |
| 1.38 | 4.1  | 1.73  | 1.9   | 3.66 | 3.04  | 6.08 | 1.31  | 0.76 | 0.59   | 6.08 |
| 1.26 | 1.23 | 0.73  | 1.3   | 4.22 | 1.91  | 1.78 | 1.31  | 1.67 | 0.5    | 1.78 |
| 0.91 | 0.97 | 0.8   | 0.67  | 1.34 | 0.5   | 4.1  | 1.5   | 1.15 | 0.82   | 4.1  |
| 1.27 | 1.08 | 4.35  | 10.95 | 4.37 | 1     | 4.97 | 5.84  | 0.59 | 0.46   | 4.97 |
| 1.19 | 1.04 | 1.27  | 2.14  | 3.2  | 1.3   | 2.33 | 2.21  | 0.85 | 0.67   | 2.33 |
| 1.67 | 0.88 | 0.73  | 0.59  | 0.79 | 0.58  | 0.6  | 0.7   | 1.05 | 1.04   | 0.6  |
| 0.75 | 0.92 | 0.83  | 9.86  | 1.49 | 3.75  | 1.04 | 67.82 | 1.14 | 142.34 | 1.04 |

|      |      |      |       |      |      |      |      |       |       |      |
|------|------|------|-------|------|------|------|------|-------|-------|------|
| 4.99 | 1.09 | 1.25 | 1.4   | 0.94 | 0.83 | 0.81 | 0.93 | 1.01  | 0.91  | 0.81 |
| 0.75 | 1.4  | 1.51 | 0.42  | 1.15 | 0.79 | 1.08 | 4.44 | 0.91  | 1.85  | 1.08 |
| 3.82 | 1.04 | 0.98 | 10.12 | 0.65 | 2.25 | 1.68 | 0.71 | 1.11  | 1     | 1.68 |
| 0.97 | 1.19 | 0.99 | 1.51  | 2.49 | 1.3  | 1.41 | 1.13 | 0.91  | 1.37  | 1.41 |
| 1.09 | 0.84 | 0.89 | 5.6   | 1.07 | 1.8  | 0.94 | 0.89 | 0.88  | 1.04  | 0.94 |
| 1.04 | 0.77 | 1.38 | 0.97  | 2.38 | 0.51 | 1.07 | 1.81 | 2.02  | 1.04  | 1.07 |
| 1.67 | 0.87 | 1.06 | 2.13  | 1.17 | 0.85 | 0.34 | 2.82 | 1.49  | 1.83  | 0.34 |
| 0.91 | 1.24 | 1.63 | 0.79  | 0.5  | 0.5  | 1.55 | 2.32 | 1.11  | 1.1   | 1.55 |
| 0.76 | 1.42 | 1.36 | 1.15  | 4.29 | 4.38 | 1.33 | 0.67 | 0.73  | 1.08  | 1.33 |
| 0.69 | 1.43 | 0.78 | 2.21  | 1.62 | 1.25 | 1.05 | 0.27 | 0.71  | 0.8   | 1.05 |
| 1.9  | 0.33 | 0.37 | 0.59  | 4.07 | 2.32 | 0.71 | 1.15 | 1.42  | 2.8   | 0.71 |
| 2.44 | 1.15 | 1.03 | 2.67  | 4    | 0.12 | 1.14 | 0.81 | 0.88  | 0.74  | 1.14 |
| 1.05 | 1.25 | 0.98 | 4.42  | 1.56 | 1.5  | 1.14 | 2.24 | 1.12  | 1.33  | 1.14 |
| 1.72 | 0.77 | 1.11 | 57.97 | 1.52 | 0.25 | 2.69 | 0.18 | 0.85  | 2     | 2.69 |
| 0.29 | 1.18 | 1.88 | 4.4   | 2.4  | 0.5  | 0.93 | 0.95 | 1.13  | 1     | 0.93 |
| 0.04 | 6.15 | 2.17 | 0.01  | 0.39 | 0.01 | 2.52 | 0.11 | 30.68 | 52.03 | 2.52 |
| 2.85 | 0.86 | 0.6  | 0.82  | 1.44 | 2.28 | 2.22 | 1.51 | 0.81  | 0.53  | 2.22 |
| 0.62 | 1.18 | 0.84 | 0.17  | 0.5  | 0.71 | 0.98 | 1.14 | 0.53  | 0.13  | 0.98 |
| 0.86 | 1.03 | 0.85 | 1.42  | 1.7  | 1.69 | 0.74 | 0.76 | 1.14  | 1.22  | 0.74 |
| 4.9  | 1.14 | 1.88 | 1.94  | 2.78 | 2.19 | 1.34 | 1.75 | 1.24  | 1.02  | 1.34 |
| 1.3  | 1.55 | 1.08 | 2.32  | 1.45 | 2    | 1.62 | 5.22 | 0.96  | 0.33  | 1.62 |
| 2.31 | 1.2  | 1.24 | 2.21  | 1.42 | 0.7  | 1.35 | 2.87 | 0.99  | 1.17  | 1.35 |
| 0.99 | 0.77 | 1.6  | 0.38  | 0.38 | 2    | 1.12 | 0.93 | 0.95  | 0.87  | 1.12 |
| 2.4  | 0.89 | 1.52 | 0.9   | 0.9  | 2.64 | 0.94 | 0.95 | 1.36  | 0.51  | 0.94 |
| 0.35 | 1.17 | 1.14 | 0.55  | 1.44 | 1.07 | 0.79 | 0.88 | 1.02  | 1.04  | 0.79 |
| 1.4  | 1.04 | 0.9  | 1     | 0.39 | 0.71 | 1.55 | 1.06 | 1.09  | 1.07  | 1.55 |
| 2.86 | 1.17 | 1.17 | 0.86  | 2.05 | 1.38 | 1.22 | 1.83 | 1.13  | 1.28  | 1.22 |
| 0.75 | 1.16 | 1.34 | 0.72  | 1.35 | 1.32 | 0.93 | 0.89 | 1.03  | 1.31  | 0.93 |
| 1.9  | 0.78 | 0.89 | 1.66  | 1.75 | 1.68 | 0.99 | 2.32 | 1.05  | 1.07  | 0.99 |
| 0.83 | 0.98 | 1.07 | 0.81  | 1.47 | 1.75 | 1.32 | 1.11 | 1.05  | 1.03  | 1.32 |
| 9.75 | 1.27 | 1.25 | 5.03  | 1.5  | 1.38 | 1.48 | 2.66 | 0.9   | 0.83  | 1.48 |
| 1.26 | 1.97 | 1.85 | 0.55  | 1.05 | 9.82 | 0.41 | 3    | 0.99  | 0.62  | 0.41 |
| 0.56 | 1.13 | 0.91 | 11.43 | 0.43 | 0.75 | 2.25 | 1.67 | 1.11  | 0.77  | 2.25 |

|      |      |      |      |      |       |      |      |      |      |      |
|------|------|------|------|------|-------|------|------|------|------|------|
| 1.04 | 0.93 | 0.69 | 1.57 | 2.08 | 1.64  | 0.75 | 1    | 1.02 | 2.26 | 0.75 |
| 0.99 | 1.13 | 1.23 | 1.82 | 1.33 | 2.07  | 1    | 0.63 | 0.93 | 0.92 | 1    |
| 1.38 | 0.99 | 1.26 | 9.25 | 1.51 | 0.33  | 1.15 | 1.05 | 0.96 | 1.59 | 1.15 |
| 0.77 | 1.21 | 1.5  | 1.81 | 2.86 | 3.73  | 1.18 | 0.7  | 1.72 | 0.6  | 1.18 |
| 1.07 | 0.63 | 0.9  | 1.68 | 0.43 | 1.07  | 0.85 | 0.95 | 1.92 | 1.17 | 0.85 |
| 0.49 | 3.14 | 1.74 | 0.58 | 3.88 | 9.41  | 3.58 | 0.78 | 0.38 | 0.62 | 3.58 |
| 0.87 | 0.93 | 1.2  | 1.47 | 1.07 | 13.5  | 1.89 | 1.7  | 0.92 | 1.52 | 1.89 |
| 1.29 | 1.1  | 1.04 | 0.52 | 1.75 | 0.58  | 1.02 | 1.27 | 1.19 | 0.71 | 1.02 |
| 2.34 | 0.54 | 0.73 | 3.06 | 1.13 | 1.28  | 0.64 | 2.8  | 1.05 | 1.65 | 0.64 |
| 2.42 | 0.74 | 0.79 | 1.08 | 3.44 | 16.07 | 1.71 | 1.19 | 0.95 | 1.39 | 1.71 |
| 1.35 | 1.14 | 1.17 | 3.56 | 1.62 | 3.41  | 0.88 | 0.9  | 1.17 | 0.65 | 0.88 |
| 1.42 | 1.16 | 1.04 | 0.8  | 0.79 | 0.9   | 0.89 | 1.19 | 1.26 | 1.26 | 0.89 |
| 2.89 | 0.89 | 1.18 | 1.81 | 0.83 | 2.52  | 1.41 | 0.43 | 0.97 | 1.03 | 1.41 |
| 1.44 | 0.91 | 14.7 | 0.78 | 0.49 | 0.81  | 0.68 | 1.3  | 1.03 | 0.84 | 0.68 |
| 0.93 | 0.85 | 0.9  | 1.26 | 0.88 | 1.26  | 1.04 | 1.95 | 0.93 | 2.56 | 1.04 |
| 1.02 | 0.93 | 1.06 | 0.7  | 1.87 | 2.38  | 1.31 | 2.63 | 1.01 | 1.01 | 1.31 |
| 1.3  | 1.05 | 0.94 | 2.07 | 2.71 | 0.53  | 0.83 | 1.98 | 0.97 | 1.32 | 0.83 |
| 0.76 | 1.28 | 1.12 | 1.11 | 1.66 | 1.13  | 2.39 | 0.96 | 0.95 | 1.75 | 2.39 |
| 1.81 | 1.19 | 0.85 | 0.62 | 1.72 | 0.87  | 4.17 | 1.28 | 1.01 | 0.97 | 4.17 |
| 0.95 | 0.82 | 1.4  | 2.5  | 1.42 | 0.8   | 0.66 | 1.2  | 0.8  | 0.81 | 0.66 |
| 0.5  | 1.15 | 0.9  | 0.83 | 1.7  | 1     | 0.73 | 0.77 | 0.81 | 0.85 | 0.73 |
| 1.27 | 0.94 | 0.96 | 0.7  | 3.83 | 0.69  | 1    | 0.97 | 0.99 | 1.09 | 1    |
| 0.87 | 0.96 | 0.95 | 1.18 | 1.5  | 0.71  | 1.05 | 0.48 | 1    | 1.21 | 1.05 |
| 1.09 | 1.5  | 0.82 | 1.36 | 0.77 | 1.25  | 0.52 | 0.27 | 1.43 | 1.73 | 0.52 |
| 1.97 | 1.02 | 0.99 | 0.7  | 4    | 0.33  | 0.48 | 0.62 | 1.13 | 0.87 | 0.48 |
| 1.78 | 1.2  | 0.8  | 0.57 | 0.62 | 0.37  | 0.88 | 0.59 | 0.85 | 1.76 | 0.88 |
| 0.69 | 1.14 | 1.13 | 0.5  | 4.22 | 2.5   | 1.14 | 1.33 | 0.92 | 1.23 | 1.14 |
| 1.17 | 0.89 | 0.57 | 0.94 | 1.29 | 0.75  | 1.19 | 0.2  | 1.34 | 2.06 | 1.19 |
| 0.4  | 0.9  | 0.93 | 0.37 | 0.32 | 0.8   | 0.58 | 4.58 | 1.32 | 1.32 | 0.58 |
| 1.38 | 1.02 | 0.94 | 0.85 | 2.22 | 1.04  | 0.98 | 1.36 | 0.94 | 0.9  | 0.98 |
| 0.62 | 1.02 | 1.11 | 0.67 | 0.84 | 0.85  | 1.24 | 1.3  | 0.95 | 1.04 | 1.24 |
| 0.75 | 1.4  | 1.51 | 0.42 | 1.15 | 0.79  | 1.08 | 4.44 | 0.91 | 1.85 | 1.08 |
| 1.08 | 1.11 | 0.9  | 0.88 | 0.82 | 0.54  | 3.55 | 0.65 | 0.97 | 1.59 | 3.55 |

|      |      |      |       |      |      |      |      |      |      |      |
|------|------|------|-------|------|------|------|------|------|------|------|
| 0.74 | 1.08 | 1    | 1.18  | 0.59 | 0.66 | 0.72 | 0.91 | 1.29 | 1.3  | 0.72 |
| 2.19 | 0.99 | 0.92 | 2.65  | 0.97 | 0.91 | 1.75 | 0.86 | 0.65 | 1.04 | 1.75 |
| 0.91 | 1.07 | 1.13 | 1.11  | 4.29 | 0.92 | 0.78 | 2.26 | 1.57 | 1.12 | 0.78 |
| 2.04 | 1.17 | 1.01 | 1.07  | 0.57 | 1.42 | 3    | 1    | 1.26 | 1.08 | 3    |
| 6.42 | 0.87 | 1.04 | 5.83  | 1.69 | 4.21 | 0.53 | 1.38 | 0.89 | 0.97 | 0.53 |
| 1    | 1.11 | 0.92 | 7.67  | 5.33 | 0.33 | 0.93 | 0.5  | 0.99 | 1.1  | 0.93 |
| 1.12 | 1.03 | 0.9  | 1.07  | 1.69 | 0.88 | 0.96 | 1.03 | 1    | 1.19 | 0.96 |
| 2.68 | 0.87 | 0.75 | 1.16  | 3    | 1.17 | 0.67 | 1.15 | 1.11 | 0.84 | 0.67 |
| 5.1  | 0.77 | 1.01 | 10.41 | 1.77 | 0.86 | 1.02 | 3.02 | 0.95 | 0.65 | 1.02 |
| 2.27 | 1.2  | 1.28 | 1.42  | 0.39 | 1.75 | 1.89 | 1.13 | 1.1  | 0.84 | 1.89 |
| 1.09 | 0.84 | 1.1  | 2.51  | 1.31 | 0.59 | 1.21 | 0.2  | 0.94 | 1.09 | 1.21 |
| 0.87 | 0.88 | 1.26 | 0.37  | 1.74 | 0.73 | 1.52 | 0.81 | 0.95 | 1.15 | 1.52 |
| 0.83 | 1.07 | 1.05 | 0.85  | 1.8  | 1.17 | 1.46 | 0.92 | 1    | 1.6  | 1.46 |
| 1.04 | 1.15 | 0.89 | 4.29  | 1.53 | 0.86 | 1.73 | 0.23 | 1.09 | 0.93 | 1.73 |
| 0.31 | 0.58 | 0.84 | 0.87  | 1.69 | 1.21 | 1.3  | 0.8  | 0.78 | 0.41 | 1.3  |
| 1.02 | 1.17 | 1.05 | 1.16  | 1.17 | 1.1  | 0.68 | 1.52 | 1.08 | 0.87 | 0.68 |
| 0.75 | 0.87 | 1.1  | 1.1   | 2.27 | 2.88 | 0.87 | 1.66 | 1.01 | 0.92 | 0.87 |
| 0.84 | 1.34 | 1.19 | 0.86  | 1.72 | 0.87 | 1.29 | 0.9  | 1.34 | 2.9  | 1.29 |
| 0.96 | 0.96 | 0.83 | 0.89  | 1.36 | 1.19 | 1.01 | 1.28 | 1.03 | 1.03 | 1.01 |
| 1.07 | 1.18 | 1.07 | 1.71  | 0.96 | 1.2  | 0.57 | 1.46 | 1.42 | 0.77 | 0.57 |
| 2.06 | 0.71 | 1.12 | 1.67  | 0.91 | 1.9  | 1.31 | 1.52 | 0.89 | 0.49 | 1.31 |
| 1.69 | 0.83 | 0.66 | 5.5   | 0.82 | 3.86 | 1.19 | 0.39 | 1.18 | 0.46 | 1.19 |
| 1.53 | 1.12 | 1.35 | 1.47  | 2.89 | 0.87 | 0.86 | 2.04 | 0.99 | 0.85 | 0.86 |
| 1.17 | 0.78 | 0.92 | 3.96  | 1.21 | 0.94 | 0.69 | 1.08 | 0.88 | 0.68 | 0.69 |
| 0.94 | 1.08 | 2.54 | 0.44  | 1.54 | 1.33 | 1.04 | 1.16 | 0.95 | 0.94 | 1.04 |
| 1.1  | 1.14 | 1.42 | 1.17  | 1.82 | 1.18 | 1.19 | 0.43 | 0.82 | 0.89 | 1.19 |
| 0.74 | 0.79 | 1.28 | 1.18  | 1.45 | 0.65 | 3.06 | 1.43 | 1    | 0.88 | 3.06 |
| 1.99 | 0.74 | 1.06 | 1.49  | 1.77 | 2.25 | 0.94 | 1.09 | 0.83 | 1.4  | 0.94 |
| 0.84 | 1.19 | 1.03 | 2.57  | 1.46 | 1.81 | 0.81 | 1.33 | 1.01 | 0.67 | 0.81 |
| 1.19 | 0.84 | 0.98 | 0.83  | 0.17 | 0.31 | 2    | 1.15 | 1.05 | 0.93 | 2    |
| 0.95 | 1.18 | 1.14 | 1.19  | 1.66 | 2.61 | 0.78 | 2.25 | 1.12 | 0.72 | 0.78 |
| 0.92 | 1.09 | 1.01 | 0.83  | 1.09 | 0.93 | 1.66 | 1.05 | 0.9  | 1.01 | 1.66 |
| 2.21 | 1.08 | 1.12 | 1.97  | 1.33 | 2.83 | 1.06 | 0.83 | 0.94 | 0.94 | 1.06 |

|      |      |      |       |      |       |      |      |      |      |      |
|------|------|------|-------|------|-------|------|------|------|------|------|
| 0.56 | 1.39 | 1.86 | 1.12  | 0.47 | 1.01  | 1.15 | 0.38 | 0.74 | 0.81 | 1.15 |
| 1.28 | 1.18 | 1.31 | 1.33  | 1.48 | 0.95  | 0.74 | 1.78 | 1.11 | 0.89 | 0.74 |
| 1.18 | 1.06 | 1    | 0.89  | 1.91 | 1.33  | 1.04 | 1.11 | 0.97 | 0.96 | 1.04 |
| 1.93 | 0.49 | 0.53 | 0.9   | 2.18 | 0.74  | 1.07 | 1.19 | 0.68 | 0.77 | 1.07 |
| 0.61 | 0.71 | 1.13 | 0.69  | 0.35 | 13.33 | 1.3  | 1.62 | 0.57 | 0.68 | 1.3  |
| 0.99 | 1.01 | 1.08 | 1.24  | 0.93 | 1.13  | 1.19 | 1.16 | 0.95 | 0.92 | 1.19 |
| 1.12 | 1.03 | 1.55 | 0.22  | 2.59 | 0.97  | 0.66 | 0.48 | 0.79 | 1.4  | 0.66 |
| 0.69 | 1.05 | 0.81 | 1.14  | 0.38 | 0.17  | 0.87 | 0.67 | 1.11 | 2.13 | 0.87 |
| 1.84 | 1    | 0.91 | 0.66  | 1.25 | 2.28  | 1.45 | 1.18 | 1.12 | 0.71 | 1.45 |
| 0.47 | 0.91 | 1.38 | 0.34  | 2.33 | 2.26  | 0.62 | 0.7  | 0.77 | 1.63 | 0.62 |
| 0.59 | 0.92 | 1.09 | 0.8   | 0.68 | 1     | 1.18 | 1.14 | 0.97 | 0.9  | 1.18 |
| 1.14 | 1.11 | 1.8  | 0.98  | 2.78 | 2.26  | 0.9  | 1.44 | 0.98 | 0.93 | 0.9  |
| 0.76 | 0.68 | 0.9  | Inf   | 0.77 | 0.59  | 0.87 | 0.7  | 0.83 | 0.98 | 0.87 |
| 0.93 | 0.8  | 0.86 | 2.92  | 5.09 | 1     | 0.92 | 1.51 | 1.06 | 0.92 | 0.92 |
| 1.42 | 1.15 | 0.82 | 1.13  | 0.6  | 1.25  | 3.13 | 0.87 | 1.23 | 0.97 | 3.13 |
| 1.54 | 0.99 | 0.99 | 1.5   | 1.79 | 0.71  | 1.35 | 1.38 | 1.01 | 1.52 | 1.35 |
| 1.27 | 1.17 | 0.96 | 1.23  | 0.65 | 2.59  | 0.96 | 1.13 | 1.11 | 0.86 | 0.96 |
| 1.07 | 0.91 | 0.91 | 0.69  | 0.76 | 1.37  | 1.89 | 0.56 | 0.96 | 0.97 | 1.89 |
| 0.91 | 1.16 | 0.57 | 1.1   | 0.47 | 0.07  | 0.83 | 1.29 | 1.08 | 1.24 | 0.83 |
| 1.62 | 0.96 | 0.78 | 2     | 1.88 | 0.77  | 0.77 | 1.07 | 0.78 | 0.99 | 0.77 |
| 0.91 | 0.89 | 1.02 | 0.78  | 1.08 | 1.33  | 1.13 | 0.85 | 1.03 | 1.01 | 1.13 |
| 1.07 | 1.17 | 2.17 | 1.83  | 2.33 | 0.84  | 3    | 0.57 | 0.61 | 1.33 | 3    |
| 1.13 | 0.98 | 1.08 | 2.52  | 2.27 | 1.25  | 0.91 | 1.04 | 0.95 | 1.34 | 0.91 |
| 0.92 | 1.07 | 1.18 | 0.94  | 2.31 | 1.33  | 1    | 1.14 | 1.1  | 0.89 | 1    |
| 0.83 | 0.97 | 0.98 | 0.71  | 0.81 | 2.02  | 0.98 | 1.24 | 0.99 | 1.27 | 0.98 |
| 1.31 | 0.8  | 0.54 | 52.71 | 0.69 | 0.46  | 0.21 | 1.38 | 0.97 | 0.27 | 0.21 |
| 2.3  | 1.03 | 1    | 2.8   | 1.5  | 0.73  | 1.11 | 1.93 | 0.95 | 0.84 | 1.11 |
| 1.18 | 1.11 | 1.16 | 1.26  | 1.21 | 1.2   | 1.06 | 0.9  | 0.94 | 0.93 | 1.06 |
| 4.55 | 0.99 | 1.04 | 1.46  | 1.23 | 1.19  | 0.97 | 1.08 | 0.91 | 0.93 | 0.97 |
| 0.89 | 1.15 | 1.18 | 1.62  | 0.53 | 0.42  | 0.92 | 1.82 | 1.03 | 0.86 | 0.92 |
| 0.43 | 0.95 | 1.51 | 1.26  | 0.47 | 0.18  | 0.86 | 1.45 | 1.44 | 1.49 | 0.86 |
| 6.6  | 0.9  | 1.02 | 0.25  | 1.12 | 1.06  | 1.07 | 1.02 | 0.91 | 0.88 | 1.07 |
| 0.74 | 1.21 | 0.95 | 4.76  | 0.17 | 1.3   | 1.1  | 1.29 | 0.78 | 0.75 | 1.1  |



|      |      |      |       |      |       |      |       |      |       |      |
|------|------|------|-------|------|-------|------|-------|------|-------|------|
| 0.81 | 1.19 | 2.12 | 1.44  | 4.38 | 10.38 | 1.53 | 0.95  | 1.13 | 0.74  | 1.53 |
| 0.67 | 1.07 | 0.85 | 2.25  | 0.54 | 0.5   | 0.52 | 0.54  | 1.3  | 1.34  | 0.52 |
| 2.28 | 0.55 | 0.95 | 2.76  | 0.71 | 1.94  | 0.98 | 0.19  | 1.08 | 0.78  | 0.98 |
| 0.29 | 0.84 | 0.84 | 19.92 | 0.61 | 0.36  | 0.54 | 2.44  | 1.25 | 0.87  | 0.54 |
| 0.98 | 1.24 | 1.13 | 1.02  | 0.91 | 1.44  | 0.73 | 1.37  | 1.24 | 0.93  | 0.73 |
| 0.56 | 0.91 | 0.85 | 3.61  | 0.58 | 0.46  | 1.08 | 0.67  | 0.93 | 0.95  | 1.08 |
| 0.97 | 0.84 | 0.93 | 0.78  | 3.46 | 1.33  | 0.48 | 4.74  | 1    | 0.8   | 0.48 |
| 1.14 | 0.92 | 1.06 | 0.73  | 4    | 0.35  | 0.85 | 2.02  | 1.03 | 0.78  | 0.85 |
| 0.72 | 1.38 | 1.32 | 0.41  | 2.92 | 4.76  | 1.46 | 0.58  | 0.75 | 0.83  | 1.46 |
| 3.9  | 1.04 | 0.73 | 1.65  | 0.81 | 1.67  | 1.23 | 7.08  | 1.24 | 0.41  | 1.23 |
| 0.71 | 1.02 | 0.81 | 0.2   | 1    | 0.57  | 1.13 | 0.8   | 0.96 | 1.1   | 1.13 |
| 1.95 | 0.85 | 0.97 | 0.4   | 1.28 | 0.67  | 0.77 | 0.66  | 1.01 | 0.89  | 0.77 |
| 0.73 | 0.95 | 0.86 | 1.22  | 0.53 | 2.5   | 3.55 | 1.38  | 0.66 | 1.17  | 3.55 |
| 1.97 | 1.04 | 0.92 | 0.77  | 3.21 | 1.15  | 1.11 | 0.72  | 0.99 | 0.75  | 1.11 |
| 1.68 | 0.98 | 0.75 | 1.38  | 2.64 | 1.28  | 1.2  | 1.35  | 0.91 | 0.81  | 1.2  |
| 1.86 | 1.03 | 0.88 | 1.88  | 0.69 | 0.69  | 0.56 | 0.75  | 1.13 | 0.44  | 0.56 |
| 0.35 | 1.15 | 0.87 | 0.5   | 3.4  | 2.33  | 0.82 | 0.79  | 1.02 | 0.98  | 0.82 |
| 0.97 | 0.96 | 1.09 | 1.74  | 0.66 | 1.1   | 0.78 | 0.71  | 0.97 | 0.68  | 0.78 |
| 1.19 | 1.29 | 0.92 | 5.33  | 5.04 | 0.83  | 1.21 | 14.16 | 1.18 | 42.28 | 1.21 |
| 0.76 | 0.88 | 0.41 | 0.28  | 0.53 | 0.2   | 1.07 | 18.8  | 2.35 | 0.35  | 1.07 |
| 0.73 | 1.11 | 0.96 | 4.47  | 1.33 | 1     | 0.83 | 4.75  | 1.09 | 1.71  | 0.83 |
| 0.62 | 0.95 | 1.45 | 0.28  | 1.48 | 1.77  | 0.64 | 0.52  | 0.76 | 1.49  | 0.64 |
| 1.18 | 1.09 | 1.31 | 1.9   | 2.4  | 0.07  | 0.37 | 2.76  | 0.79 | 1.32  | 0.37 |
| 8.14 | 0.83 | 1.27 | 0.56  | 0.97 | 1.82  | 0.35 | 30.45 | 1.15 | 1.93  | 0.35 |
| 0.68 | 1.22 | 1.11 | 0.87  | 1.14 | 2.79  | 1.23 | 0.8   | 1.1  | 0.8   | 1.23 |
| 0.86 | 1.08 | 1.26 | 0.79  | 0.5  | 6.93  | 1.15 | 0.89  | 0.98 | 0.72  | 1.15 |
| 0.94 | 1.22 | 0.63 | 0.55  | 1.14 | 0.9   | 0.36 | 0.93  | 0.92 | 1.1   | 0.36 |
| 1.04 | 0.89 | 0.99 | 0.36  | 0.46 | 1.33  | 1.34 | 1.4   | 1.64 | 0.68  | 1.34 |
| 0.96 | 1.58 | 1.47 | 3.62  | 1.36 | 0.75  | 2.01 | 12.86 | 0.82 | 0.72  | 2.01 |
| 1.19 | 0.72 | 1.83 | 0.81  | 1.62 | 1.4   | 0.26 | 2.02  | 0.61 | 0.27  | 0.26 |
| 1.09 | 1.12 | 1.19 | 4     | 0.15 | 0.68  | 0.87 | 6.17  | 1.01 | 0.64  | 0.87 |
| 0.83 | 0.94 | 1.48 | 1.46  | 1.67 | 0.58  | 1.68 | 1.01  | 0.97 | 0.11  | 1.68 |
| 0.56 | 1.25 | 1.41 | 1.81  | 2.49 | 1.33  | 1.19 | 0.58  | 0.89 | 1.44  | 1.19 |

|      |      |      |      |       |      |      |      |      |       |      |
|------|------|------|------|-------|------|------|------|------|-------|------|
| 0.68 | 1.19 | 1.16 | 1.57 | 3     | 0.89 | 0.88 | 1.64 | 1.01 | 0.86  | 0.88 |
| 0.82 | 0.8  | 1.17 | 0.58 | 0.77  | 0.73 | 1.21 | 3.17 | 0.98 | 1.17  | 1.21 |
| 1.03 | 0.56 | 0.52 | 1.52 | 16.38 | 0.95 | 0.73 | 0.78 | 2.32 | 1.02  | 0.73 |
| 0.46 | 0.86 | 0.85 | 0.95 | 0.88  | 1.78 | 0.92 | 0.28 | 0.93 | 0.45  | 0.92 |
| 0.75 | 1.29 | 0.78 | 0.25 | 0.71  | 1.91 | 0.84 | 2.06 | 1.02 | 0.82  | 0.84 |
| 0.9  | 0.83 | 1.27 | 1.07 | 1.85  | 1.11 | 1.05 | 1.01 | 0.95 | 1.32  | 1.05 |
| 1.33 | 0.95 | 1.1  | 2.38 | 1.48  | 2.97 | 1.14 | 1.16 | 0.91 | 0.89  | 1.14 |
| 1.24 | 0.99 | 1.06 | 0.8  | 1.34  | 3.47 | 0.8  | 0.3  | 0.87 | 1.09  | 0.8  |
| 1.65 | 1.24 | 1.42 | 0.68 | 1.31  | 1.12 | 1.33 | 1.39 | 1.1  | 0.78  | 1.33 |
| 2.84 | 0.81 | 1.07 | 0.4  | 0.61  | 0.97 | 1.19 | 0.56 | 1.16 | 0.57  | 1.19 |
| 0.68 | 1.01 | 1.04 | 0.14 | 1.14  | 0.96 | 1.14 | 3.91 | 1.15 | 0.87  | 1.14 |
| 6.25 | 0.26 | 0.44 | 0.15 | 0.28  | 0.63 | 2.33 | 2.53 | 7.17 | 14.57 | 2.33 |
| 0.81 | 0.74 | 1.46 | 2    | 0.53  | 0.55 | 0.29 | 2.31 | 0.95 | 0.89  | 0.29 |
| 0.55 | 1.1  | 1.14 | 0.5  | 1.67  | 8.67 | 0.76 | 0.44 | 1.21 | 0.76  | 0.76 |

| 202431_s_at | 217028_at | 217192_s_at | 212983_at | 208606_s_at | 214639_s_at | 201531_at | 201502_s_at | 201466_s_at | 219993_at | 207826_s_at |
|-------------|-----------|-------------|-----------|-------------|-------------|-----------|-------------|-------------|-----------|-------------|
| 1.04        | 1.24      | 2.91        | 1.29      | 0.51        | 0.98        | 1.23      | 1.09        | 1.15        | 2.06      | 1.34        |
| 0.41        | 1.78      | 1.38        | 0.97      | 1.21        | 1.56        | 3.36      | 2.23        | 0.66        | 0.91      | 1.81        |
| 1.13        | 0.83      | 1.15        | 1.51      | 1.4         | 1.18        | 0.93      | 0.67        | 7.25        | 2.21      | 1.14        |
| 1.17        | 3.57      | 1.47        | 1.07      | 6.01        | 2.35        | 1.27      | 1.11        | 1.42        | 2.61      | 1.04        |
| 1.22        | 1.07      | 1.22        | 0.88      | 1.94        | 0.77        | 0.65      | 2.56        | 0.88        | 0.96      | 1.19        |
| 735.49      | 1.12      | 1.18        | 0.83      | 3.69        | 117.83      | 0.99      | 0.98        | 3.02        | 1.9       | 0.81        |
| 0.85        | 0.17      | 0.51        | 2.06      | 0.02        | 0.48        | 0.58      | 1.29        | 1.1         | 3.3       | 0.63        |
| 1.08        | 0.9       | 1.39        | 1.04      | 0.95        | 1.21        | 1.19      | 1.6         | 1.89        | 2.55      | 2.75        |
| 0.82        | 2.41      | 0.84        | 1.1       | 7.47        | 1.83        | 1.11      | 1.32        | 0.49        | 0.84      | 1.02        |
| 1.95        | 4.84      | 4.42        | 1         | 3.75        | 0.72        | 6.21      | 2.58        | 4.29        | 2.81      | 12.93       |
| 0.89        | 2.6       | 4.35        | 0.91      | 0.83        | 0.4         | 1.56      | 1.16        | 0.92        | 0.35      | 1.15        |
| 0.97        | 2.78      | 0.6         | 1.44      | 2.5         | 1.27        | 1.66      | 0.58        | 1.22        | 2.41      | 1.55        |
| 1.03        | 1.56      | 1.05        | 1.18      | 1.49        | 1.47        | 1.43      | 0.85        | 0.95        | 0.87      | 1.01        |
| 0.15        | 0.45      | 8.85        | 0.74      | 13.08       | 3.63        | 0.84      | 0.43        | 0.39        | 8.31      | 0.03        |
| 1.71        | 0.7       | 2.23        | 0.96      | 3.5         | 1.56        | 1.55      | 1.02        | 0.87        | 1.33      | 0.88        |
| 0.92        | 7.08      | 2.81        | 0.99      | 1.8         | 1.26        | 0.59      | 1.15        | 1.06        | 5.07      | 2.69        |
| 0.83        | 2.64      | 2.44        | 1.13      | 0.94        | 0.69        | 0.8       | 0.7         | 0.88        | 3.07      | 0.58        |
| 0.74        | Inf       | 7.84        | 1.07      | 2.85        | 1.07        | 1.27      | 2.03        | 0.97        | 0.6       | 2.48        |
| 0.22        | 0.4       | 0.99        | 1.88      | 30.5        | 1.24        | 0.94      | 1.4         | 0.83        | 2.06      | 1.02        |
| 0.74        | 1.96      | 2.67        | 1.24      | 3.33        | 5.27        | 1.17      | 0.54        | 0.91        | 0.86      | 0.84        |
| 0.49        | 1.21      | 94.18       | 2.52      | 0.14        | 0.51        | 0.91      | 1.22        | 1.74        | 0.58      | 1.73        |
| 0.88        | 0.97      | 3.12        | 0.92      | 10          | 0.99        | 2.24      | 3.45        | 0.97        | 0.15      | 0.25        |
| 1.41        | 4.86      | 0.96        | 0.95      | 6.52        | 0.36        | 1.01      | 1.18        | 1.08        | 3.28      | 0.77        |
| 0.75        | 4.44      | 0.75        | 0.71      | 1.94        | 0.45        | 0.88      | 0.35        | 1.95        | 6.65      | 0.11        |
| 6.79        | 0.15      | 0.89        | 0.84      | 1.45        | 0.01        | 2.39      | 2.23        | 0.95        | 0.82      | 0.14        |
| 0.76        | 0.19      | 1.02        | 0.84      | 1.62        | 2.42        | 1.19      | 0.78        | 3.33        | 0.84      | 1.79        |
| 0.76        | 0.74      | 4.73        | 0.98      | 1.12        | 1.53        | 0.97      | 0.42        | 0.53        | 1.38      | 0.26        |
| 1.03        | 3.78      | 1.16        | 0.61      | 2.68        | 2.79        | 7.44      | 4.18        | 0.78        | 2.24      | 0.52        |
| 3.43        | 0.21      | 1.56        | 1.34      | 1.33        | 0.11        | 1.29      | 0.54        | 0.31        | 7.27      | 2.78        |
| 3.16        | 2.13      | 0.72        | 1.28      | 1.76        | 1.3         | 1.82      | 1.47        | 1.02        | 5.28      | 1.72        |

|        |         |      |       |      |       |      |      |      |       |       |
|--------|---------|------|-------|------|-------|------|------|------|-------|-------|
| 1.37   | 0.43    | 0.89 | 1.54  | 4.11 | 1.09  | 0.58 | 0.66 | 0.3  | 6.09  | 0.81  |
| 4.73   | 366.66  | 1.05 | 1.69  | 0.32 | 6.39  | 0.38 | 0.93 | 0.07 | 0.15  | 8.38  |
| 0.71   | 0.89    | 2.16 | 1.11  | 1.22 | 0.96  | 0.76 | 0.84 | 1.08 | 1.07  | 1.22  |
| 0.55   | 0.8     | 5.91 | 21.77 | 0.11 | 0.4   | 0.43 | 0.35 | 0.28 | 2.05  | 0.17  |
| 1.69   | 0.67    | 0.22 | 1.9   | 0.56 | 0.3   | 1.26 | 2.61 | 0.68 | 0.4   | 0.64  |
| 1.53   | 6.82    | 4.08 | 2.45  | 16.1 | 1.16  | 0.81 | 0.81 | 0.72 | 1.36  | 14.95 |
| 0.97   | 12.34   | 2.43 | 0.47  | 1.01 | 2.6   | 1.52 | 2.35 | 0.55 | 6.18  | 1.16  |
| 1.17   | 0.35    | 1.79 | 1.01  | 2    | 1.05  | 0.73 | 0.71 | 0.91 | 0.36  | 0.92  |
| 0.55   | 27.81   | 1.66 | 10.21 | 0.77 | 0.54  | 1.33 | 3.57 | 1.96 | 0.74  | 0.47  |
| 0.48   | 2.67    | 0.52 | 0.74  | 8.5  | 3.67  | 0.64 | 1.29 | 0.77 | 1.68  | 1.91  |
| 0.71   | 1.29    | 1.07 | 1.72  | 17.4 | 0.85  | 5.25 | 0.91 | 0.75 | 0.3   | 0.89  |
| 0.47   | 1.29    | 0.42 | 1.04  | 0.56 | 8.96  | 0.86 | 1.24 | 1.05 | 3.4   | 1.25  |
| 0.44   | 7.25    | 2.92 | 8.05  | 0.5  | 1.23  | 2.37 | 3.43 | 7.15 | 1.26  | 0.89  |
| 2.84   | 0.12    | 1.59 | 1.74  | 1.21 | 1.39  | 1.23 | 0.54 | 7.37 | 1.8   | 0.07  |
| 0.6    | 2.67    | 1.95 | 5.64  | 0.44 | 1.35  | 1.77 | 2.85 | 4.89 | 0.85  | 0.95  |
| 1.23   | 2.99    | 1.29 | 1.01  | 1.18 | 2.82  | 1.14 | 2.51 | 1.77 | 3.18  | 6.83  |
| 0.86   | 1.04    | 1.46 | 1.14  | 0.67 | 0.85  | 0.81 | 7.24 | 1.23 | 1     | 1.27  |
| 1.38   | 1.5     | 2.88 | 0.96  | 3.22 | 0.77  | 1.11 | 1.45 | 1.01 | 2.63  | 1.44  |
| 0.9    | 0.89    | 0.56 | 1.06  | 0.67 | 1.06  | 1.23 | 0.94 | 0.99 | 1.35  | 1.14  |
| 6.01   | 19.75   | 1.16 | 1.13  | 7.74 | 0.6   | 1.57 | 0.6  | 1.17 | 0.66  | 1.07  |
| 0.74   | 0.33    | 0.43 | 0.85  | 0.07 | 1.42  | 0.77 | 5.73 | 0.99 | 2.58  | 1.06  |
| 5.45   | 0.89    | 0.74 | 1.07  | 0.8  | 1.7   | 0.67 | 0.72 | 0.91 | 3.69  | 0.7   |
| 1.2    | 4.8     | 1.65 | 0.97  | 0.94 | 9.19  | 0.55 | 0.85 | 0.89 | 0.71  | 0.28  |
| 0.64   | 0.79    | 4.69 | 1.25  | 2.48 | 63.33 | 1.39 | 1.21 | 1.24 | 4.24  | 0.75  |
| 1.96   | 1357.58 | 3.92 | 4.5   | 2.85 | 0.76  | 0.44 | 1.24 | 1.52 | 12.32 | 0.4   |
| 0.62   | 18.33   | 1.24 | 1.26  | 4.39 | 0.7   | 1.33 | 1.54 | 1.16 | 0.81  | 0.52  |
| 0.59   | 14.5    | 1.8  | 1.73  | 0.2  | 4.27  | 1.89 | 6.08 | 3.73 | 2.97  | 0.62  |
| 0.5    | 0.84    | 2.12 | 0.73  | 3.8  | 1.18  | 4.16 | 1.78 | 0.6  | 3.8   | 2.1   |
| 0.82   | 0.59    | 1.14 | 0.8   | 0.67 | 0.5   | 1.53 | 4.1  | 0.57 | 0.76  | 0.94  |
| 0.46   | 1.75    | 2.01 | 4.35  | 0.58 | 1.36  | 2.55 | 4.97 | 4.1  | 1.48  | 1.64  |
| 0.67   | 10.49   | 3.28 | 1.27  | 2.51 | 0.83  | 1.38 | 2.33 | 1.06 | 3.45  | 1.02  |
| 1.04   | 1.75    | 1.1  | 0.73  | 0.91 | 0.66  | 0.6  | 0.6  | 0.55 | 1.08  | 3.43  |
| 142.34 | 14      | 3    | 0.83  | 1.37 | 4.08  | 1.42 | 1.04 | 1.08 | 1.39  | 4.43  |

|       |        |      |      |       |       |      |      |      |      |       |
|-------|--------|------|------|-------|-------|------|------|------|------|-------|
| 0.91  | 4.85   | 0.87 | 1.25 | 2.44  | 0.93  | 0.72 | 0.81 | 1.1  | 0.47 | 1.18  |
| 1.85  | 33.32  | 0.98 | 1.51 | 15.99 | 0.95  | 1.01 | 1.08 | 0.98 | 6.46 | 2.13  |
| 1     | 1.05   | 5.94 | 0.98 | 4.18  | 1.11  | 0.99 | 1.68 | 1.24 | 0.4  | 0.98  |
| 1.37  | 1.33   | 0.73 | 0.99 | 1.15  | 10.4  | 1.4  | 1.41 | 1.16 | 1.32 | 1.57  |
| 1.04  | 13.48  | 3.53 | 0.89 | 7.59  | 0.94  | 0.8  | 0.94 | 1.47 | 3.48 | 0.7   |
| 1.04  | 1.43   | 0.95 | 1.38 | 2.03  | 12.57 | 1.06 | 1.07 | 2.08 | 0.91 | 0.78  |
| 1.83  | 5.14   | 1.12 | 1.06 | 0.66  | 0.83  | 0.33 | 0.34 | 1.53 | 2.2  | 1.29  |
| 1.1   | 0.51   | 2.44 | 1.63 | 3     | 0.93  | 1.35 | 1.55 | 0.83 | 0.6  | 1.4   |
| 1.08  | 7.88   | 0.56 | 1.36 | 4.57  | 1.76  | 1.14 | 1.33 | 1.6  | 4.97 | 0.21  |
| 0.8   | 1.6    | 1.22 | 0.78 | 0.23  | 4.09  | 0.66 | 1.05 | 0.91 | 0.9  | 1.23  |
| 2.8   | 2.17   | 1.22 | 0.37 | 1.06  | 0.82  | 0.67 | 0.71 | 1.54 | 4.49 | 1.54  |
| 0.74  | 2.57   | 1.54 | 1.03 | 0.67  | 1.14  | 0.86 | 1.14 | 0.77 | 0.25 | 1.29  |
| 1.33  | 4.5    | 0.62 | 0.98 | 2.14  | 1.05  | 1.08 | 1.14 | 1.03 | 1.04 | 0.6   |
| 2     | 1.88   | 1.86 | 1.11 | 1.53  | 1.06  | 1.49 | 2.69 | 1.43 | 2.46 | 1.41  |
| 1     | 4      | 5.83 | 1.88 | 5.33  | 1.48  | 0.49 | 0.93 | 0.59 | 0.5  | 0.51  |
| 52.03 | 259.49 | 0.7  | 2.17 | 0.02  | 0.17  | 0.56 | 2.52 | 2.17 | 0.81 | 12.87 |
| 0.53  | 3.76   | 2.55 | 0.6  | 5.5   | 1.96  | 1.75 | 2.22 | 2.18 | 0.79 | 4.02  |
| 0.13  | 582.67 | 1.41 | 0.84 | 0.9   | 0.43  | 0.75 | 0.98 | 1.4  | 0.81 | 7.75  |
| 1.22  | 17.25  | 1.83 | 0.85 | 1.39  | 1.55  | 1.68 | 0.74 | 1.57 | 1.01 | 0.8   |
| 1.02  | 0.59   | 1.15 | 1.88 | 3.88  | 3.6   | 3.55 | 1.34 | 1.34 | 1.89 | 5.4   |
| 0.33  | 141.02 | 0.77 | 1.08 | 26.13 | 13.2  | 2.36 | 1.62 | 3.51 | 1.03 | 1.17  |
| 1.17  | 0.23   | 1.11 | 1.24 | 2.61  | 1.8   | 0.93 | 1.35 | 2.22 | 0.53 | 0.92  |
| 0.87  | 0.17   | 0.77 | 1.6  | 0.08  | 0.68  | 0.68 | 1.12 | 0.93 | 1.92 | 0.9   |
| 0.51  | 4.13   | 1.29 | 1.52 | 6.31  | 0.83  | 0.71 | 0.94 | 0.53 | 0.98 | 1.17  |
| 1.04  | 0.88   | 1.04 | 1.14 | 1.57  | 0.76  | 1.18 | 0.79 | 0.65 | 2    | 0.43  |
| 1.07  | 1.63   | 2.47 | 0.9  | 0.81  | 0.93  | 1.49 | 1.55 | 0.62 | 1.32 | 1.02  |
| 1.28  | 1.13   | 2.89 | 1.17 | 7     | 0.91  | 1.06 | 1.22 | 0.83 | 0.74 | 1.22  |
| 1.31  | 0.9    | 0.98 | 1.34 | 0.8   | 1.67  | 1.25 | 0.93 | 1.3  | 1.7  | 1.03  |
| 1.07  | 1.44   | 1.61 | 0.89 | 0.57  | 1.53  | 1.22 | 0.99 | 2.14 | 0.38 | 1.23  |
| 1.03  | 1.78   | 0.83 | 1.07 | 1.08  | 0.87  | 0.86 | 1.32 | 1.29 | 1.62 | 1.11  |
| 0.83  | 1.7    | 2.29 | 1.25 | 8.66  | 1.15  | 1.67 | 1.48 | 0.76 | 2.13 | 1.18  |
| 0.62  | 0.44   | 0.49 | 1.85 | 17.04 | 0.97  | 0.7  | 0.41 | 1.27 | 1.44 | 0.46  |
| 0.77  | 1.23   | 2.21 | 0.91 | 7.54  | 1.67  | 1.87 | 2.25 | 7.1  | 0.83 | 0.69  |

|      |       |      |      |       |      |      |      |      |      |      |
|------|-------|------|------|-------|------|------|------|------|------|------|
| 2.26 | 3.8   | 1.61 | 0.69 | 2.44  | 1.43 | 0.63 | 0.75 | 1.78 | 1.83 | 0.74 |
| 0.92 | 0.95  | 0.82 | 1.23 | 1.83  | 0.75 | 1.23 | 1    | 0.7  | 0.67 | 1.17 |
| 1.59 | 3.15  | 2.91 | 1.26 | 2.65  | 1.8  | 1.59 | 1.15 | 1.17 | 1.37 | 1.23 |
| 0.6  | 2.92  | 3.38 | 1.5  | 2.18  | 0.83 | 0.8  | 1.18 | 1.45 | 2.11 | 0.36 |
| 1.17 | 1.96  | 1.36 | 0.9  | 0.9   | 8.89 | 0.54 | 0.85 | 0.76 | 0.71 | 1.05 |
| 0.62 | 0.19  | 0.79 | 1.74 | 1.82  | 0.7  | 0.31 | 3.58 | 0.44 | 1.2  | 5.61 |
| 1.52 | 5.79  | 1.63 | 1.2  | 2.07  | 1.05 | 1.32 | 1.89 | 1.03 | 1.9  | 1.13 |
| 0.71 | 5.04  | 1.34 | 1.04 | 1.22  | 1.11 | 0.87 | 1.02 | 1.43 | 1.09 | 0.9  |
| 1.65 | 0.67  | 1.9  | 0.73 | 0.68  | 3.2  | 1.13 | 0.64 | 1.14 | 2.66 | 0.6  |
| 1.39 | 1.29  | 0.92 | 0.79 | 6.6   | 5.15 | 2.04 | 1.71 | 3.71 | 6.73 | 1.2  |
| 0.65 | 0.93  | 1.5  | 1.17 | 2.2   | 0.95 | 1.38 | 0.88 | 0.93 | 5.44 | 0.84 |
| 1.26 | 1.51  | 2.24 | 1.04 | 1.12  | 1.17 | 0.88 | 0.89 | 0.84 | 1.31 | 1.77 |
| 1.03 | 0.42  | 2.38 | 1.18 | 1.5   | 1.44 | 2.12 | 1.41 | 0.9  | 5.96 | 0.67 |
| 0.84 | 0.93  | 2.61 | 14.7 | 0.24  | 0.69 | 0.82 | 0.68 | 0.52 | 1.88 | 0.65 |
| 2.56 | 0.34  | 1.18 | 0.9  | 0.72  | 0.73 | 2.1  | 1.04 | 1.23 | 0.86 | 0.87 |
| 1.01 | 1.08  | 1.09 | 1.06 | 1.71  | 1.51 | 0.74 | 1.31 | 2.01 | 0.87 | 2    |
| 1.32 | 0.99  | 3.28 | 0.94 | 0.39  | 0.23 | 0.87 | 0.83 | 0.49 | 2.21 | 2.37 |
| 1.75 | 1.34  | 0.62 | 1.12 | 0.87  | 9.73 | 1.39 | 2.39 | 1.74 | 1.1  | 1.81 |
| 0.97 | 0.64  | 2.74 | 0.85 | 9.85  | 0.92 | 1.45 | 4.17 | 0.8  | 2.29 | 0.45 |
| 0.81 | 0.38  | 2.26 | 1.4  | 0.71  | 3.21 | 1.77 | 0.66 | 1.36 | 2.12 | 1.67 |
| 0.85 | 0.29  | 1.36 | 0.9  | 0.57  | 1.03 | 0.29 | 0.73 | 0.57 | 1.1  | 1.21 |
| 1.09 | 0.97  | 1.14 | 0.96 | 0.66  | 2.17 | 0.77 | 1    | 1.14 | 0.69 | 1.37 |
| 1.21 | 1.85  | 1.6  | 0.95 | 1.09  | 1.23 | 1.4  | 1.05 | 0.75 | 1.22 | 1.23 |
| 1.73 | 0.18  | 0.78 | 0.82 | 0.68  | 1.47 | 0.98 | 0.52 | 4.37 | 1.15 | 0.76 |
| 0.87 | 1.79  | 0.62 | 0.99 | 3.83  | 0.75 | 1.34 | 0.48 | 0.39 | 1.25 | 2.7  |
| 1.76 | 0.93  | 0.85 | 0.8  | 2.1   | 1.13 | 0.9  | 0.88 | 1.26 | 0.45 | 1.99 |
| 1.23 | 1.31  | 3.22 | 1.13 | 9.62  | 0.62 | 1.06 | 1.14 | 1.03 | 5    | 1.07 |
| 2.06 | 1.33  | 1.13 | 0.57 | 11.53 | 0.82 | 0.91 | 1.19 | 1.57 | 3.88 | 0.14 |
| 1.32 | 0.67  | 0.82 | 0.93 | 1.92  | 2.3  | 1.03 | 0.58 | 0.67 | 0.89 | 1.07 |
| 0.9  | 0.8   | 1.08 | 0.94 | 3.08  | 0.93 | 1.01 | 0.98 | 1.01 | 1    | 1.59 |
| 1.04 | 0.93  | 1.96 | 1.11 | 1     | 0.82 | 1.18 | 1.24 | 1.06 | 0.95 | 0.58 |
| 1.85 | 33.32 | 0.98 | 1.51 | 15.99 | 0.95 | 1.01 | 1.08 | 0.98 | 6.46 | 2.13 |
| 1.59 | 1.78  | 1.09 | 0.9  | 12.67 | 1.21 | 0.91 | 3.55 | 0.84 | 0.67 | 1.39 |

|      |      |      |      |      |      |      |      |       |      |      |
|------|------|------|------|------|------|------|------|-------|------|------|
| 1.3  | 2.01 | 1.89 | 1    | 0.47 | 0.43 | 1.01 | 0.72 | 1.16  | 0.48 | 1.09 |
| 1.04 | 0.19 | 1.54 | 0.92 | 4.9  | 4.42 | 1.51 | 1.75 | 0.81  | 4.25 | 1.21 |
| 1.12 | 0.93 | 0.96 | 1.13 | 1.28 | 0.63 | 0.87 | 0.78 | 1.3   | 1.34 | 1.48 |
| 1.08 | 1.12 | 0.95 | 1.01 | 1.75 | 6.11 | 0.66 | 3    | 0.93  | 3.09 | 4.39 |
| 0.97 | 1.12 | 1.15 | 1.04 | 3.28 | 1.02 | 0.96 | 0.53 | 0.79  | 0.58 | 3.07 |
| 1.1  | 0.86 | 0.67 | 0.92 | 5    | 0.94 | 0.88 | 0.93 | 0.99  | 0.33 | 1.07 |
| 1.19 | 1.86 | 5.77 | 0.9  | 2.7  | 0.91 | 1.11 | 0.96 | 0.85  | 1.37 | 1.09 |
| 0.84 | 1.26 | 1    | 0.75 | 1.63 | 1.12 | 1.32 | 0.67 | 1.16  | 0.95 | 1.26 |
| 0.65 | 0.21 | 1.14 | 1.01 | 1.85 | 1.25 | 1.3  | 1.02 | 1.08  | 0.64 | 1.12 |
| 0.84 | 1.09 | 1.31 | 1.28 | 5.89 | 1.09 | 0.9  | 1.89 | 0.54  | 1.63 | 1.07 |
| 1.09 | 6.75 | 2.2  | 1.1  | 0.59 | 4.83 | 1.17 | 1.21 | 1.48  | 1.36 | 0.72 |
| 1.15 | 7.92 | 1    | 1.26 | 2.35 | 1.06 | 1.06 | 1.52 | 2.06  | 1.18 | 4.89 |
| 1.6  | 1.88 | 0.73 | 1.05 | 1.25 | 6.21 | 1.21 | 1.46 | 1.24  | 1.29 | 2.77 |
| 0.93 | 1.56 | 1.3  | 0.89 | 3.62 | 1.8  | 1.39 | 1.73 | 0.69  | 1.21 | 1.3  |
| 0.41 | 0.59 | 0.64 | 0.84 | 1.33 | 1.57 | 1.56 | 1.3  | 22.54 | 3.82 | 0.09 |
| 0.87 | 3.02 | 3    | 1.05 | 0.82 | 0.94 | 0.98 | 0.68 | 0.88  | 1.45 | 0.74 |
| 0.92 | 4.55 | 1.43 | 1.1  | 4.4  | 1.48 | 1.16 | 0.87 | 1.22  | 7.15 | 1.01 |
| 2.9  | 1.75 | 1.46 | 1.19 | 1.71 | 0.81 | 1.29 | 1.29 | 1.17  | 1.47 | 0.65 |
| 1.03 | 2.87 | 0.79 | 0.83 | 1.24 | 1.09 | 1.09 | 1.01 | 0.98  | 5.39 | 0.97 |
| 0.77 | 1.16 | 1.09 | 1.07 | 0.42 | 0.86 | 0.76 | 0.57 | 0.78  | 0.81 | 0.41 |
| 0.49 | 2.1  | 0.89 | 1.12 | 0.96 | 0.87 | 1.35 | 1.31 | 1.17  | 1.3  | 1.24 |
| 0.46 | 2.96 | 3    | 0.66 | 0.57 | 1.21 | 0.88 | 1.19 | 0.84  | 1.62 | 0.57 |
| 0.85 | 0.94 | 1.18 | 1.35 | 1.49 | 1.84 | 0.73 | 0.86 | 0.93  | 1.31 | 0.89 |
| 0.68 | 1.25 | 1.05 | 0.92 | 1.38 | 0.76 | 1.01 | 0.69 | 0.49  | 1.16 | 1.74 |
| 0.94 | 0.76 | 0.96 | 2.54 | 2.26 | 2.28 | 0.89 | 1.04 | 0.96  | 1.93 | 1.34 |
| 0.89 | 1.69 | 3.74 | 1.42 | 1.64 | 0.85 | 1.01 | 1.19 | 0.6   | 1.03 | 1.23 |
| 0.88 | 1.15 | 1.45 | 1.28 | 2.68 | 7.83 | 1.04 | 3.06 | 0.29  | 1.02 | 1.03 |
| 1.4  | 2.29 | 9.2  | 1.06 | 0.67 | 1.9  | 0.98 | 0.94 | 1.09  | 3.04 | 1.68 |
| 0.67 | 0.78 | 1.34 | 1.03 | 3.19 | 1.02 | 0.93 | 0.81 | 1     | 1.78 | 1    |
| 0.93 | 1.56 | 1.02 | 0.98 | 0.11 | 0.96 | 0.96 | 2    | 0.89  | 11   | 1.2  |
| 0.72 | 0.91 | 1.19 | 1.14 | 1.72 | 1.23 | 0.87 | 0.78 | 1.27  | 3    | 1.05 |
| 1.01 | 3.12 | 3.31 | 1.01 | 1.79 | 1.1  | 1.6  | 1.66 | 1.34  | 3.07 | 0.98 |
| 0.94 | 0.9  | 0.64 | 1.12 | 0.58 | 1    | 0.99 | 1.06 | 1.35  | 0.65 | 1.04 |

|      |      |      |      |      |      |       |      |      |      |       |
|------|------|------|------|------|------|-------|------|------|------|-------|
| 0.81 | 2.87 | 1.16 | 1.86 | 2.44 | 2.97 | 1.15  | 1.15 | 2.41 | 5.39 | 0.46  |
| 0.89 | 1.21 | 1.47 | 1.31 | 1.85 | 2.29 | 0.9   | 0.74 | 1.46 | 0.85 | 1.08  |
| 0.96 | 2.17 | 1.33 | 1    | 0.7  | 0.85 | 0.86  | 1.04 | 1.09 | 1.17 | 1.2   |
| 0.77 | 2    | 0.65 | 0.53 | 1.53 | 0.77 | 1.2   | 1.07 | 1.03 | 3.73 | 1.41  |
| 0.68 | 0.32 | 0.62 | 1.13 | 3.67 | 1.66 | 1.07  | 1.3  | 1.95 | 2.71 | 71.03 |
| 0.92 | 1.21 | 1.01 | 1.08 | 1.65 | 0.84 | 1.02  | 1.19 | 1.13 | 1.02 | 1.55  |
| 1.4  | 0.41 | 1.1  | 1.55 | 3.33 | 1.35 | 0.6   | 0.66 | 0.17 | 7.05 | 0.86  |
| 2.13 | 1.49 | 1.51 | 0.81 | 1.18 | 0.93 | 3.29  | 0.87 | 1.1  | 1.61 | 1.49  |
| 0.71 | 4.22 | 0.8  | 0.91 | 0.38 | 1.02 | 1.25  | 1.45 | 1.2  | 2.07 | 4.89  |
| 1.63 | 0.52 | 0.96 | 1.38 | 2.22 | 1.29 | 0.49  | 0.62 | 0.59 | 4.85 | 0.36  |
| 0.9  | 1.62 | 1    | 1.09 | 0.07 | 4    | 1.11  | 1.18 | 2.43 | 3.67 | 0.37  |
| 0.93 | 0.96 | 0.82 | 1.8  | 1.29 | 1.04 | 0.72  | 0.9  | 0.72 | 1.08 | 0.89  |
| 0.98 | 0.89 | 1.71 | 0.9  | 0.24 | 0.93 | 0.68  | 0.87 | 1.04 | 1.12 | 0.97  |
| 0.92 | 0.9  | 1.21 | 0.86 | 2    | 1.05 | 0.93  | 0.92 | 1.46 | 1.75 | 1.42  |
| 0.97 | 1.17 | 0.87 | 0.82 | 2.85 | 3.72 | 0.53  | 3.13 | 0.98 | 0.88 | 4.63  |
| 1.52 | 1.72 | 0.99 | 0.99 | 0.06 | 0.48 | 1.24  | 1.35 | 1.45 | 1.16 | 1.21  |
| 0.86 | 1.18 | 0.86 | 0.96 | 1.56 | 0.81 | 0.84  | 0.96 | 1.42 | 1.87 | 0.83  |
| 0.97 | 0.5  | 0.72 | 0.91 | 0.83 | 1.58 | 0.83  | 1.89 | 0.94 | 3.61 | 1.86  |
| 1.24 | 4.57 | 0.76 | 0.57 | 0.77 | 1.07 | 0.91  | 0.83 | 1.22 | 0.41 | 0.77  |
| 0.99 | 0.56 | 1.22 | 0.78 | 0.34 | 1.18 | 0.49  | 0.77 | 0.91 | 1.49 | 0.56  |
| 1.01 | 1.69 | 5.27 | 1.02 | 0.85 | 1.02 | 1.02  | 1.13 | 1.16 | 4.12 | 0.76  |
| 1.33 | 0.01 | 1.09 | 2.17 | 0.89 | 0.54 | 10.48 | 3    | 0.17 | 2.63 | 5     |
| 1.34 | 0.91 | 0.96 | 1.08 | 1.08 | 1.3  | 0.88  | 0.91 | 0.57 | 2.33 | 1.57  |
| 0.89 | 6.63 | 0.91 | 1.18 | 2.15 | 3.15 | 0.72  | 1    | 1.05 | 5.37 | 0.21  |
| 1.27 | 1.56 | 1.16 | 0.98 | 0.9  | 0.75 | 0.97  | 0.98 | 0.92 | 0.83 | 0.63  |
| 0.27 | 1.4  | 2.52 | 0.54 | 0.79 | 0.02 | 0.8   | 0.21 | 1.7  | 0.11 | 1.81  |
| 0.84 | 0.75 | 6.73 | 1    | 3.57 | 1.04 | 0.97  | 1.11 | 1.29 | 1.02 | 0.98  |
| 0.93 | 1.96 | 1.86 | 1.16 | 1.11 | 0.99 | 1.07  | 1.06 | 0.64 | 1.26 | 0.95  |
| 0.93 | 6.34 | 1.03 | 1.04 | 1.57 | 0.98 | 0.94  | 0.97 | 1.28 | 0.69 | 0.98  |
| 0.86 | 1.01 | 0.28 | 1.18 | 0.64 | 0.42 | 1.03  | 0.92 | 0.55 | 4.39 | 1.43  |
| 1.49 | 1.46 | 2.46 | 1.51 | 5.95 | 1.55 | 1.12  | 0.86 | 0.93 | 0.85 | 1.18  |
| 0.88 | 2    | 0.61 | 1.02 | 2    | 1.39 | 0.91  | 1.07 | 0.98 | 0.08 | 0.99  |
| 0.75 | 0.59 | 2.98 | 0.95 | 1.97 | 2    | 0.66  | 1.1  | 1.22 | 2.41 | 0.83  |



|       |       |      |      |       |      |      |      |      |      |      |
|-------|-------|------|------|-------|------|------|------|------|------|------|
| 0.74  | 4.83  | 0.7  | 2.12 | 1     | 0.89 | 2.89 | 1.53 | 0.86 | 1.12 | 0.89 |
| 1.34  | 0.87  | 0.71 | 0.85 | 1     | 1.02 | 1.04 | 0.52 | 0.76 | 1.62 | 2.93 |
| 0.78  | 4.53  | 2.45 | 0.95 | 1.28  | 1.2  | 1.1  | 0.98 | 1    | 1.33 | 0.58 |
| 0.87  | 0.05  | 1.56 | 0.84 | 1.06  | 0.73 | 0.52 | 0.54 | 1.55 | 0.48 | 2.04 |
| 0.93  | 1.48  | 1.09 | 1.13 | 1.56  | 0.92 | 1.07 | 0.73 | 2.32 | 1.01 | 0.53 |
| 0.95  | 1.2   | 0.88 | 0.85 | 1.49  | 1.78 | 0.82 | 1.08 | 0.7  | 1.26 | 1    |
| 0.8   | 0.49  | 0.48 | 0.93 | 0.55  | 1.1  | 0.82 | 0.48 | 1.21 | 0.58 | 1.2  |
| 0.78  | 0.97  | 3.14 | 1.06 | 0.46  | 1.33 | 0.96 | 0.85 | 1.29 | 0.58 | 1.12 |
| 0.83  | 3.88  | 1.03 | 1.32 | 2.43  | 0.72 | 1.05 | 1.46 | 1.33 | 2.42 | 0.47 |
| 0.41  | 5.04  | 0.49 | 0.73 | 0.93  | 4.82 | 0.69 | 1.23 | 0.32 | 1.79 | 1.26 |
| 1.1   | 0.93  | 1.33 | 0.81 | 1.34  | 0.87 | 1.1  | 1.13 | 0.98 | 1.12 | 1.17 |
| 0.89  | 1.5   | 5.27 | 0.97 | 0.29  | 0.89 | 1.28 | 0.77 | 0.7  | 1.05 | 0.97 |
| 1.17  | 4.08  | 0.43 | 0.86 | 1     | 0.5  | 0.7  | 3.55 | 1.6  | 0.32 | 0.67 |
| 0.75  | 0.91  | 0.43 | 0.92 | 0.83  | 0.68 | 1.44 | 1.11 | 1.12 | 0.71 | 0.71 |
| 0.81  | 1.74  | 0.67 | 0.75 | 1.38  | 1.47 | 1.3  | 1.2  | 1.68 | 2.04 | 0.96 |
| 0.44  | 3.19  | 2.96 | 0.88 | 5.94  | 0.97 | 0.91 | 0.56 | 0.6  | 2.39 | 1.29 |
| 0.98  | 0.24  | 1.15 | 0.87 | 0.18  | 0.75 | 1.16 | 0.82 | 1.09 | 1.27 | 0.4  |
| 0.68  | 0.94  | 1.23 | 1.09 | 0.9   | 0.47 | 1.1  | 0.78 | 0.81 | 1.02 | 1.57 |
| 42.28 | 0.58  | 6.79 | 0.92 | 0.92  | 2.83 | 1.59 | 1.21 | 1.77 | 8.75 | 1.58 |
| 0.35  | 12.38 | 0.53 | 0.41 | 0.35  | 0.93 | 1.31 | 1.07 | 0.27 | 3    | 1.06 |
| 1.71  | 15.33 | 2.23 | 0.96 | 3.21  | 0.76 | 6.07 | 0.83 | 2.27 | 0.8  | 1.12 |
| 1.49  | 0.48  | 0.81 | 1.45 | 3.56  | 1.06 | 0.52 | 0.64 | 0.5  | 4.99 | 0.56 |
| 1.32  | 0.06  | 1.3  | 1.31 | 0.38  | 1.68 | 0.69 | 0.37 | 1.08 | 0.75 | 0.45 |
| 1.93  | 0.03  | 1.37 | 1.27 | 1.15  | 0.43 | 0.76 | 0.35 | 2.78 | 1.43 | 0.71 |
| 0.8   | 1.08  | 0.71 | 1.11 | 1.19  | 1.09 | 1.06 | 1.23 | 1.52 | 1.32 | 3.24 |
| 0.72  | 7.56  | 2.16 | 1.26 | 0.91  | 1.32 | 1.32 | 1.15 | 0.69 | 0.82 | 1.48 |
| 1.1   | 0.25  | 1.1  | 0.63 | 0.79  | 1.45 | 1.94 | 0.36 | 0.44 | 0.75 | 2.75 |
| 0.68  | 0.29  | 1.13 | 0.99 | 6     | 0.86 | 0.7  | 1.34 | 0.85 | 3.55 | 0.56 |
| 0.72  | 1.55  | 4.43 | 1.47 | 51.05 | 1.47 | 1.06 | 2.01 | 1.49 | 1.23 | 2.42 |
| 0.27  | 2     | 0.2  | 1.83 | 98.75 | 0.31 | 2.38 | 0.26 | 1.73 | 1.32 | 1.62 |
| 0.64  | 0.65  | 2.69 | 1.19 | 0.75  | 1.11 | 1.25 | 0.87 | 2.09 | 1.33 | 1.63 |
| 0.11  | 1.06  | 2.05 | 1.48 | 0.88  | 1.48 | 2.62 | 1.68 | 2.45 | 1.1  | 7.44 |
| 1.44  | 2.41  | 6.11 | 1.41 | 1.17  | 9.78 | 4.14 | 1.19 | 0.35 | 1.03 | 2.12 |

|       |       |      |      |      |      |      |      |        |      |      |
|-------|-------|------|------|------|------|------|------|--------|------|------|
| 0.86  | 0.85  | 0.73 | 1.16 | 9.5  | 4    | 2.8  | 0.88 | 1.14   | 0.87 | 0.98 |
| 1.17  | 1.41  | 1.25 | 1.17 | 0.66 | 1.2  | 1.47 | 1.21 | 1.2    | 2.53 | 0.9  |
| 1.02  | 1.89  | 3.18 | 0.52 | 0.21 | 9.83 | 1.76 | 0.73 | 4.07   | 1.12 | 0.4  |
| 0.45  | 65.11 | 0.52 | 0.85 | 1.06 | 2.05 | 0.65 | 0.92 | 2.28   | 0.16 | 1.04 |
| 0.82  | 0.3   | 0.56 | 0.78 | 0.96 | 1.83 | 0.68 | 0.84 | 0.62   | 2.07 | 1.21 |
| 1.32  | 1.9   | 0.75 | 1.27 | 3.05 | 1.3  | 1.23 | 1.05 | 2.54   | 1.17 | 0.74 |
| 0.89  | 2.62  | 0.93 | 1.1  | 1.8  | 0.92 | 1.41 | 1.14 | 1.92   | 0.69 | 1.1  |
| 1.09  | 23.33 | 1.07 | 1.06 | 1.63 | 1.28 | 1.06 | 0.8  | 0.88   | 0.92 | 0.04 |
| 0.78  | 0.7   | 0.64 | 1.42 | 1.35 | 0.89 | 0.99 | 1.33 | 2.04   | 1.02 | 4    |
| 0.57  | 0.83  | 1.42 | 1.07 | 5.84 | 1.01 | 1.12 | 1.19 | 1.26   | 1.53 | 0.33 |
| 0.87  | 1.13  | 1.81 | 1.04 | 0.48 | 0.69 | 0.93 | 1.14 | 0.89   | 2.83 | 4.98 |
| 14.57 | 4.06  | 0.31 | 0.44 | 0.54 | 1.85 | 1.37 | 2.33 | 107.71 | 0.83 | 0.43 |
| 0.89  | 1.54  | 4.01 | 1.46 | 0.33 | 1.3  | 0.96 | 0.29 | 1.96   | 0.69 | 1.14 |
| 0.76  | 2.5   | 0.43 | 1.14 | 1    | 2.12 | 1.36 | 0.76 | 0.34   | 2.29 | 1.48 |

| 203238_s_at | 201288_at | 204236_at | 205469_s_at | 207059_at | 214435_x_at | 204990_s_at | 206943_at | 211370_s_at | 206645_s_at | 201417_at |
|-------------|-----------|-----------|-------------|-----------|-------------|-------------|-----------|-------------|-------------|-----------|
| 1.1         | 2.81      | 2.9       | 1.32        | 1.45      | 1.11        | 16.02       | 4.01      | 0.67        | 2           | 0.8       |
| 1.07        | 3.56      | 1.39      | 0.97        | 1.17      | 1.49        | 1.6         | 1.08      | 0.94        | 0.66        | 1.52      |
| 2.05        | 0.82      | 1.13      | 0.79        | 1.43      | 1.28        | 1.45        | 0.57      | 9.06        | 0.39        | 0.65      |
| 1.06        | 1.13      | 3.27      | 0.92        | 1.36      | 1.13        | 1.16        | 0.99      | 2.8         | 2.28        | 0.9       |
| 1.07        | 3.08      | 2.24      | 1.02        | 1.03      | 0.96        | 6.01        | 1.08      | 1.13        | 1.5         | 0.86      |
| 1.13        | 0.98      | 1.08      | 1.37        | 3.92      | 0.89        | 6.11        | 4.08      | 23.33       | 2.74        | 0.48      |
| 0.78        | 1.53      | 4.08      | 0.31        | 0.58      | 1.54        | 0.88        | 4.56      | 0.73        | 0.24        | 0.69      |
| 1.08        | 0.89      | 0.81      | 0.99        | 0.76      | 0.81        | 3.73        | 0.57      | 1.16        | 0.33        | 0.91      |
| 1.05        | 1.47      | Inf       | 0.97        | 1.57      | 1.2         | 1.19        | 0.92      | 0.96        | 1.27        | 0.56      |
| 0.15        | 0.49      | 0.88      | 1.64        | 0.75      | 1.35        | 0.3         | 1.11      | 0.44        | 1.53        | 1.3       |
| 1.34        | 0.74      | 1.04      | 0.93        | 0.84      | 0.84        | 3.59        | 1.88      | 1.04        | 1.17        | 1.15      |
| 2.3         | 0.85      | 0.93      | 0.7         | 1.26      | 0.93        | 0.81        | 0.85      | 1.14        | 0.61        | 0.79      |
| 1.08        | 1.12      | 0.95      | 0.96        | 0.75      | 0.66        | 0.32        | 0.79      | 1.1         | 3.58        | 1.18      |
| 0.47        | 0.42      | 22.5      | 2.03        | 3.36      | 0.55        | 0.66        | 6.21      | 7.52        | 10.82       | 26.24     |
| 2.58        | 0.81      | 0.88      | 0.54        | 1.51      | 0.54        | 1.81        | 1.75      | 1.65        | 1.07        | 0.84      |
| 1.15        | 0.12      | 0.43      | 0.65        | 0.91      | 0.87        | 1.14        | 0.72      | 0.9         | 0.31        | 3.45      |
| 0.98        | 2.52      | 1.29      | 0.63        | 0.73      | 1.22        | 0.88        | 0.39      | 1.59        | 0.62        | 0.42      |
| 3.44        | 0.87      | 1.26      | 1.36        | 1.45      | 1.14        | 0.86        | 1.08      | 1.06        | 2.42        | 2.66      |
| 0.4         | 2.6       | 0.78      | 1.45        | 1.43      | 1.04        | 3.63        | 1.31      | 1.25        | 0.67        | 0.42      |
| 1.74        | 1.89      | 0.23      | 0.45        | 2.52      | 1.03        | 6.39        | 0.56      | 1.77        | 3.42        | 0.59      |
| 2.57        | 1.08      | 0.63      | 1.4         | 0.94      | 0.71        | 3.31        | 0.79      | 0.43        | 1.48        | 2.37      |
| 9.08        | 0.68      | 7.01      | 17.64       | 5.3       | 0.59        | 1.65        | 6.92      | 1.64        | 2.79        | 0.68      |
| 1.21        | 1.38      | 0.85      | 2.24        | 1.42      | 0.87        | 4.61        | 0.78      | 1.17        | 0.38        | 1.69      |
| 4.9         | 0.4       | 1.65      | 0.72        | 0.76      | 1.02        | 0.07        | 0.45      | 1.11        | 0.47        | 0.26      |
| 0.3         | 170.23    | 0.99      | 0.57        | 0.59      | 0.93        | 10.1        | 0.11      | 0.48        | 1.38        | 0.06      |
| 2.75        | 1.23      | 2.16      | 0.79        | 0.92      | 1.29        | 0.67        | 10.2      | 1.41        | 1.88        | 1.06      |
| 1.06        | 0.41      | 0.12      | 0.55        | 0.97      | 0.8         | 0.95        | 1.1       | 1.01        | 7.28        | 2.53      |
| 2.31        | 0.47      | 11.75     | 7.36        | 6.8       | 1           | 0.96        | 4.26      | 1.29        | 1.97        | 1.28      |
| 0.42        | 1.74      | 5.62      | 1.33        | 1.34      | 0.72        | 11.44       | 3.81      | 1.92        | 0.13        | 3.83      |
| 0.7         | 2.67      | 0.94      | 1.68        | 1.25      | 0.87        | 3.81        | 0.43      | 0.68        | 1.18        | 1.27      |

|      |       |      |      |      |      |       |      |      |       |      |
|------|-------|------|------|------|------|-------|------|------|-------|------|
| 2.42 | 0.79  | 0.58 | 0.47 | 0.84 | 1.19 | 2.11  | 2.18 | 0.63 | 3.11  | 0.3  |
| 0.19 | 1.95  | 0.16 | 0.22 | 1.36 | 1.87 | 0.17  | 2.22 | 1.85 | 21.47 | 0.67 |
| 0.98 | 0.77  | 4.27 | 1.15 | 1.12 | 1.13 | 0.87  | 1.54 | 1.02 | 1.7   | 1.1  |
| 0.61 | 0.87  | 1.23 | 0.96 | 1.02 | 1.39 | 0.4   | 0.98 | 1.5  | 4.4   | 0.57 |
| 0.35 | 0.09  | 1.14 | 1.14 | 1.63 | 0.85 | 5.61  | 2.57 | 1.17 | 25.67 | 2    |
| 0.66 | 3.02  | 6.95 | 1.38 | 6.24 | 1.36 | 16.97 | 1.23 | 1.13 | 1.16  | 0.53 |
| 1.83 | 0.31  | 0.21 | 1.28 | 1.44 | 1.03 | 1.01  | 0.84 | 1.35 | 1.75  | 3.29 |
| 1.06 | 0.75  | 0.71 | 1.09 | 0.75 | 0.97 | 1.86  | 0.82 | 0.6  | 2.19  | 1.25 |
| 1.71 | 1.43  | 7.45 | 0.51 | 0.86 | 0.88 | 1.46  | 0.57 | 0.94 | 1.01  | 1.32 |
| 0.43 | 0.17  | 0.31 | 1.04 | 0.58 | 2.25 | 2.26  | 2.56 | 1.04 | 1.59  | 1.1  |
| 1.14 | 1.41  | 1    | 3.73 | 1.18 | 1.28 | 3.03  | 0.21 | 1.37 | 6.7   | 0.97 |
| 1.21 | 1.1   | 1.36 | 0.44 | 1.16 | 1.01 | 0.41  | 1.04 | 0.96 | 1.56  | 1.05 |
| 1.83 | 0.17  | 0.24 | 1.2  | 0.96 | 2.9  | 0.7   | 1.89 | 1.06 | 13.89 | 2.51 |
| 3.78 | 1.91  | 1.27 | 0.81 | 0.84 | 0.59 | 3.06  | 8.62 | 1.25 | 11.48 | 6.35 |
| 1.37 | 0.42  | 0.16 | 1.09 | 0.9  | 2.3  | 0.76  | 1.95 | 1.03 | 12.89 | 2.3  |
| 0.99 | 8.63  | 1.64 | 1.14 | 1.06 | 1.57 | 1.1   | 1.07 | 1.04 | 0.88  | 1.37 |
| 1.81 | 1.03  | 0    | 0.71 | 0.66 | 0.78 | 1.14  | 0.59 | 0.92 | 0.15  | 1.11 |
| 1.49 | Inf   | Inf  | 1.12 | 0.61 | 1.15 | 1.14  | 0.7  | 1.12 | 4.41  | 1.11 |
| 1.2  | 2.79  | 1.31 | 1.09 | 0.7  | 1.02 | 0.52  | 1.3  | 0.98 | 1.03  | 0.98 |
| 4.31 | 0.23  | 1.99 | 0.93 | 1.69 | 1.27 | 0.86  | 1.72 | 0.89 | 0.47  | 0.49 |
| 1.12 | 0.9   | 1    | 0.73 | 0.98 | 0.93 | 0.83  | 1.38 | 0.83 | 1.92  | 1.24 |
| 0.82 | 0.56  | 2.17 | 1.25 | 0.83 | 0.91 | 1.07  | 1.27 | 1.12 | 2.07  | 0.84 |
| 0.96 | 0.73  | 4.32 | 1.07 | 0.94 | 1.72 | 0.28  | 1.09 | 0.99 | 2.05  | 1.32 |
| 1.05 | 48.04 | 1.09 | 0.84 | 0.79 | 0.82 | 16    | 0.91 | 1.12 | 2.63  | 0.99 |
| 0.68 | 9.03  | 0.78 | 0.54 | 1.94 | 2.47 | 2.68  | 0.4  | 0.65 | 1.37  | 0.62 |
| 1.26 | 0.89  | 0.89 | 1.41 | 0.09 | 1.11 | 0.94  | 0.52 | 0.91 | 1.73  | 0.85 |
| 1.24 | 16.3  | 6.78 | 3.61 | 3.61 | 1.03 | 3.88  | 1.5  | 0.59 | 0.11  | 0.23 |
| 0.44 | 1.63  | 1.72 | 4.3  | 1    | 0.69 | 1.71  | 0.45 | 3.08 | 0.32  | 0.9  |
| 1.25 | 1.19  | 1    | 0.88 | 1.6  | 0.93 | 1.66  | 0.7  | 1.14 | 5.5   | 0.92 |
| 3.99 | 0.27  | 0.43 | 1.2  | 0.96 | 1.97 | 0.56  | 1.2  | 1.03 | 8.5   | 1.95 |
| 0.94 | 0.91  | 0.8  | 0.96 | 0.91 | 1.03 | 1.75  | 1.41 | 0.95 | 1.79  | 0.99 |
| 1.23 | 0.16  | 0.5  | 1.25 | 1.01 | 1.03 | 2.52  | 1.16 | 1.01 | 2.23  | 2.78 |
| 3.33 | 14    | 1.37 | 1.26 | 0.94 | 0.92 | 0.6   | 0.84 | 1.15 | 0.86  | 1.13 |

|      |      |      |      |      |      |       |      |      |       |       |
|------|------|------|------|------|------|-------|------|------|-------|-------|
| 0.37 | 3.28 | 4.27 | 1.09 | 1.33 | 1.03 | 1.73  | 1.72 | 0.95 | 3.71  | 1.04  |
| 3.69 | 3.76 | 2.95 | 3.91 | 7.55 | 1.22 | 5.65  | 1.72 | 1.03 | 61.5  | 3.69  |
| 1.44 | 1.01 | 0.89 | 2.8  | 0.23 | 1.62 | 1.71  | 0.72 | 1.18 | 3.45  | 0.95  |
| 6.01 | 5.85 | 8.05 | 1.05 | 2.77 | 1.12 | 1     | 2.43 | 0.95 | 5.89  | 2.15  |
| 0.81 | 1.35 | 1.58 | 1.54 | 1.07 | 2.55 | 0.68  | 1.01 | 0.87 | 1.1   | 1.06  |
| 3.17 | 1.34 | 3.96 | 0.82 | 1.29 | 1.13 | 2.52  | 2.37 | 0.97 | 1.06  | 13.66 |
| 0.86 | 0.07 | 3.55 | 1.32 | 0.96 | 1.05 | 0.9   | 2.49 | 1.53 | 5.04  | 0.91  |
| 0.82 | 0.96 | 1.15 | 0.98 | 0.76 | 0.61 | 14.72 | 1.73 | 2.43 | 0.69  | 0.7   |
| 0.59 | 3.34 | 2.26 | 0.77 | 0.97 | 1.87 | 1.65  | 1.9  | 0.67 | 2.42  | 1.83  |
| 1.53 | 1.07 | 0.28 | 0.62 | 1.42 | 1.73 | 0.55  | 0.72 | 1.85 | 0.85  | 2.26  |
| 7.59 | 2.14 | 6.74 | 0.95 | 8.66 | 0.43 | 2.34  | 0.34 | 3.01 | 21.26 | 2.54  |
| 0.72 | 0.24 | 3    | 0.46 | 1.05 | 1.01 | 1.01  | 0.62 | 0.77 | 1.73  | 1.29  |
| 0.86 | 2.05 | 5.5  | 0.45 | 1.14 | 1.04 | 0.52  | 0.95 | 1.12 | 1.04  | 0.88  |
| 1.26 | 1.25 | 1.58 | 1.51 | 1.81 | 0.9  | 1.35  | 0.59 | 0.69 | 1.78  | 8.99  |
| 1.45 | 1.3  | 0.46 | 1.06 | 0.61 | 0.59 | 0.78  | 1.55 | 0.81 | 0.58  | 0.95  |
| 0.68 | 0.32 | 0.59 | 0.12 | 0.04 | 1.27 | 0.79  | 0.59 | 0.21 | 0.06  | 0.04  |
| 1.42 | 5.21 | 3.16 | 1.07 | 1.26 | 0.78 | 3.63  | 1.38 | 0.92 | 0.8   | 0.73  |
| 0.68 | 0.65 | 1.71 | 0.15 | 0.38 | 1.29 | 0.74  | 0.44 | 0.64 | 0.87  | 3.04  |
| 1.59 | 1.04 | 1.18 | 2.15 | 1.09 | 1.23 | 1.19  | 1.25 | 1    | 0.9   | 0.8   |
| 4.05 | 0.93 | 0.79 | 1.13 | 1.45 | 0.81 | 2.27  | 1.44 | 1.69 | 12.6  | 4.25  |
| 0.42 | 15.3 | 0.79 | 3.67 | 2.32 | 0.91 | 2.91  | 1.52 | 1.22 | 0.59  | 0.55  |
| 0.77 | 3.37 | 0.92 | 2    | 3.91 | 1.14 | 4.09  | 3.02 | 1.71 | 1.97  | 0.83  |
| 0.98 | 1.49 | 3.91 | 0.74 | 0.68 | 1.44 | 0.89  | 3.89 | 0.85 | 0.43  | 0.74  |
| 1.37 | 0.93 | 0.44 | 0.67 | 1.13 | 0.84 | 1.11  | 0.96 | 1.09 | 0.96  | 0.79  |
| 1.11 | 0.91 | 2.56 | 2.4  | 2.2  | 0.76 | 2.01  | 0.57 | 1.34 | 2.34  | 0.85  |
| 1.62 | 0.74 | 3    | 0.86 | 1.38 | 0.97 | 1.03  | 1.28 | 0.79 | 1.35  | 0.78  |
| 1.05 | 1.42 | 0.93 | 0.63 | 0.77 | 0.92 | 1.34  | 4.91 | 0.99 | 1.08  | 0.89  |
| 1.61 | 0.98 | 1.07 | 1.67 | 2.55 | 1.06 | 7.42  | 1.27 | 1.03 | 0.4   | 0.88  |
| 0.84 | 0.53 | 7.24 | 0.79 | 0.83 | 1.11 | 0.54  | 1.17 | 0.58 | 1.67  | 0.94  |
| 3.18 | 0.63 | 0.91 | 1.04 | 0.86 | 0.95 | 1.52  | 0.8  | 1    | 5.36  | 0.97  |
| 1.3  | 1.3  | 0.69 | 0.73 | 0.96 | 1.06 | 3.59  | 1.19 | 1.25 | 6.77  | 0.87  |
| 0.34 | 0.74 | 0.5  | 1.05 | 1.08 | 1.03 | 0.65  | 1.16 | 1.09 | 1.13  | 0.22  |
| 0.6  | 1.08 | 0.75 | 1.26 | 3.16 | 1.48 | 3.17  | 1.38 | 1.19 | 9     | 1.15  |

|      |      |      |      |      |      |      |      |      |       |       |
|------|------|------|------|------|------|------|------|------|-------|-------|
| 1.18 | 1.94 | 5.58 | 1.37 | 1.2  | 0.53 | 1.62 | 1.6  | 0.6  | 2.46  | 1.36  |
| 0.86 | 1.12 | 1.06 | 0.49 | 0.77 | 1.11 | 0.91 | 1    | 0.82 | 0.85  | 0.94  |
| 0.91 | 1.39 | 1.82 | 1.17 | 1.03 | 1.21 | 0.78 | 2.03 | 0.86 | 1.49  | 1.14  |
| 0.46 | 6.19 | 3.14 | 0.68 | 0.78 | 1.09 | 1.01 | 2.11 | 0.46 | 1.3   | 1.12  |
| 1.65 | 3.32 | 0.39 | 0.72 | 1.05 | 1.06 | 0.62 | 1.77 | 1.43 | 0.75  | 10.71 |
| 0.63 | 3.38 | 1.48 | 0.77 | 1.21 | 0.47 | 2.15 | 0.6  | 0.53 | 1.24  | 1.06  |
| 3.07 | 0.8  | 1.98 | 3.97 | 1.13 | 1.16 | 0.92 | 0.88 | 1.15 | 1.72  | 0.79  |
| 1.22 | 1.32 | 1.27 | 1.15 | 0.7  | 1.69 | 0.38 | 0.76 | 0.95 | 10.49 | 1.69  |
| 0.73 | 1.87 | 8.69 | 0.91 | 1.74 | 1.41 | 0.38 | 1.33 | 0.8  | 2.55  | 0.85  |
| 1.19 | 1.88 | 2.59 | 0.97 | 0.84 | 1.12 | 0.78 | 0.88 | 1.37 | 0.94  | 1.67  |
| 0.97 | 3.33 | 0.79 | 9    | 0.93 | 0.92 | 3    | 2.8  | 1.08 | 1.09  | 0.71  |
| 0.98 | 1.47 | 5.62 | 1.1  | 1.16 | 0.86 | 1.11 | 1.03 | 1.43 | 3.48  | 0.97  |
| 1.14 | 3.47 | 1.22 | 0.89 | 1.46 | 1.33 | 1.07 | 1.4  | 0.73 | 1.84  | 1.25  |
| 0.53 | 1.24 | 1.31 | 1.03 | 1.08 | 1.22 | 0.77 | 0.98 | 1.26 | 1.93  | 0.79  |
| 0.94 | 1.27 | 1.13 | 1    | 1.06 | 0.94 | 1.52 | 1    | 1.25 | 0.82  | 0.99  |
| 1.67 | 0.71 | 1.21 | 1.29 | 0.56 | 1.18 | 3    | 0.85 | 0.99 | 1.14  | 2.05  |
| 1.34 | 1.08 | 1.49 | 0.4  | 4.36 | 0.91 | 1.1  | 1.62 | 0.69 | 2.2   | 1.19  |
| 6.46 | 4.91 | 6.19 | 1.39 | 1.9  | 1.15 | 1.12 | 2.08 | 1.08 | 5.7   | 1.37  |
| 1.14 | 1.02 | 0.91 | 6.79 | 1.34 | 1.15 | 1.77 | 1.14 | 0.97 | 9.11  | 0.85  |
| 0.36 | 3.97 | 2.04 | 1.17 | 0.85 | 1.13 | 0.99 | 1.44 | 0.8  | 1     | 0.98  |
| 3.33 | 1.23 | 1.62 | 1.11 | 0.89 | 1.19 | 0.69 | 0.88 | 0.67 | 0.48  | 0.6   |
| 0.66 | 0.97 | 0.95 | 0.97 | 2.7  | 1.14 | 2.02 | 2.6  | 0.99 | 0.93  | 0.97  |
| 1.01 | 1.13 | 1.68 | 0.81 | 1.08 | 1.1  | 1.02 | 0.93 | 1.21 | 1     | 0.99  |
| 0.67 | 0.77 | 0.7  | 0.38 | 2.12 | 0.43 | 0.2  | 1.17 | 1.98 | 0.35  | 1.37  |
| 1.18 | 0.8  | 0.58 | 1.1  | 1.29 | 0.7  | 0.77 | 1.03 | 0.84 | 0.69  | 1     |
| 1.13 | 1.26 | 2.53 | 0.99 | 1.38 | 0.87 | 1.19 | 1.45 | 0.96 | 1.11  | 0.72  |
| 1.34 | 0.34 | 0.81 | 0.58 | 2.73 | 0.95 | 1.35 | 0.45 | 1.05 | 0.22  | 1.14  |
| 4.88 | 0.53 | 2.49 | 1.96 | 0.91 | 0.67 | 2.77 | 0.9  | 1.52 | 5.42  | 1.83  |
| 0.45 | 1.14 | 1.59 | 0.7  | 0.98 | 1.05 | 0.95 | 0.83 | 0.62 | 0.3   | 0.32  |
| 1.6  | 1    | 1.17 | 1.17 | 0.94 | 1.01 | 0.64 | 1.19 | 0.9  | 4.36  | 1.1   |
| 0.9  | 0.91 | 1.13 | 1.39 | 0.81 | 1.05 | 1.39 | 1.91 | 0.71 | 0.3   | 1.01  |
| 3.69 | 3.76 | 2.95 | 3.91 | 7.55 | 1.22 | 5.65 | 1.72 | 1.03 | 61.5  | 3.69  |
| 0.64 | 0.95 | 0.92 | 1.15 | 0.83 | 1.21 | 0.56 | 1.04 | 0.96 | 0.15  | 0.81  |

|      |       |      |      |      |      |      |      |      |      |        |
|------|-------|------|------|------|------|------|------|------|------|--------|
| 1.52 | 2.72  | 0.78 | 0.67 | 1.79 | 0.84 | 1.14 | 0.68 | 0.99 | 0.03 | 3.56   |
| 1.34 | 1.58  | 8.15 | 2.22 | 1.69 | 0.83 | 0.95 | 1.36 | 1.05 | 1.07 | 1.86   |
| 1.12 | 0.57  | 23   | 1.67 | 2.05 | 1.06 | 0.46 | 1.69 | 0.95 | 0.87 | 1.05   |
| 2.61 | 0.72  | 0.62 | 0.94 | 1.46 | 1.02 | 1.63 | 1.14 | 1.04 | 3.25 | 0.98   |
| 0.82 | 4.24  | Inf  | 3.98 | 2.96 | 1.26 | 3.83 | 1.12 | 0.91 | 1.23 | 362.78 |
| 0.16 | 1.5   | 1    | 0.12 | 1.94 | 1.01 | 0.87 | 0.71 | 0.78 | 1.71 | 1.27   |
| 1.01 | 2.92  | 0.83 | 1.1  | 0.58 | 0.97 | 1.95 | 1.89 | 0.84 | 1.4  | 0.89   |
| 1.9  | 1.17  | 1.26 | 2.13 | 1.11 | 1.14 | 1.88 | 0.6  | 1.41 | 0.64 | 1.15   |
| 0.13 | 0.94  | 7.62 | 1.56 | 0.92 | 0.65 | 0.04 | 0.58 | 1.18 | 0.02 | 0.98   |
| 1.97 | 1.21  | 0.81 | 1.23 | 0.61 | 1.24 | 0.49 | 1.32 | 1.06 | 4.93 | 1.02   |
| 0.43 | 1.06  | 1.53 | 0.38 | 3.17 | 1.85 | 0.82 | 1.13 | 0.68 | 0.84 | 1.16   |
| 2.67 | 3.14  | 3.04 | 0.69 | 0.83 | 1.46 | 0.7  | 0.69 | 3.09 | 1.08 | 1      |
| 3.82 | 6.4   | 7.88 | 1.2  | 1.4  | 1.11 | 0.92 | 2.58 | 1.38 | 4.33 | 1.6    |
| 4.77 | 0.65  | 0.2  | 1.03 | 1.66 | 0.88 | 0.95 | 0.69 | 0.84 | 4.44 | 0.95   |
| 3.01 | 0.78  | 1.41 | 0.53 | 0.49 | 2.1  | 3.1  | 0.54 | 1.38 | 2.54 | 2.16   |
| 0.85 | 1.02  | 1.16 | 1.24 | 0.89 | 1.27 | 2.41 | 0.65 | 1.11 | 1.92 | 1.19   |
| 1.26 | 2.85  | 3.33 | 1.16 | 1.07 | 0.94 | 2.18 | 0.78 | 0.99 | 3.81 | 0.98   |
| 0.76 | 0.82  | 0.52 | 1.02 | 0.74 | 1.32 | 1.65 | 1.23 | 1.08 | 1.13 | 0.8    |
| 0.49 | 1.76  | 1.47 | 1.22 | 1.2  | 0.91 | 0.44 | 0.71 | 0.93 | 1.52 | 0.92   |
| 0.5  | 1.08  | 1.37 | 1.34 | 1.99 | 1.01 | 1.1  | 0.73 | 0.81 | 1.54 | 0.58   |
| 1.01 | 23.83 | 1.11 | 1.49 | 1.09 | 0.95 | 0.75 | 1.37 | 1.04 | 0.98 | 0.8    |
| 2.1  | 0.71  | 0.54 | 1.07 | 0.67 | 3.15 | 0.98 | 1.42 | 1.8  | 0.46 | 0.62   |
| 0.84 | 0.95  | 0.88 | 1.01 | 1.24 | 1.09 | 1.15 | 0.92 | 1.34 | 2.88 | 1.77   |
| 1.62 | 0.83  | 1.74 | 2.08 | 0.31 | 0.64 | 1.83 | 2.89 | 0.84 | 0.32 | 1.33   |
| 1.24 | 0.22  | 0.93 | 1.3  | 2.45 | 1.4  | 1.08 | 4    | 1.01 | 1.1  | 0.93   |
| 1.25 | 3.31  | Inf  | 1.26 | 1.17 | 0.96 | 1.4  | 2.84 | 1.1  | 2.36 | 0.56   |
| 0.55 | 1.25  | 0.5  | 0.99 | 1.05 | 1.05 | 1.34 | 0.88 | 1.37 | 0.36 | 1.1    |
| 0.92 | 0.56  | 4.33 | 1.02 | 0.72 | 1.17 | 0.59 | 1.31 | 0.75 | 0.85 | 1.21   |
| 1.46 | 3.63  | 1.11 | 1.39 | 1.49 | 1.09 | 1.2  | 1.36 | 1.07 | 3.03 | 1.11   |
| 0.27 | 0.48  | 0.83 | 4.67 | 0.92 | 1.07 | 2.35 | 1.26 | 1.21 | 0.13 | 0.52   |
| 0.92 | 1.03  | 0.65 | 0.75 | 1.36 | 1.07 | 1.06 | 0.58 | 0.93 | 1.34 | 1.19   |
| 0.91 | 6.48  | 3.38 | 1.01 | 1.11 | 0.98 | 2.3  | 4.42 | 0.92 | 0.94 | 0.92   |
| 0.33 | 1.02  | 0.85 | 1.26 | 1.74 | 1    | 0.29 | 3.06 | 0.99 | 1    | 1.02   |

|      |       |      |      |      |      |       |      |      |      |      |
|------|-------|------|------|------|------|-------|------|------|------|------|
| 0.73 | 5.12  | 1.34 | 0.68 | 0.92 | 2.03 | 1.62  | 1.6  | 0.65 | 0.53 | 1.91 |
| 1.15 | 1.04  | 0.7  | 0.77 | 0.85 | 1.39 | 0.58  | 1.33 | 1.04 | 0.85 | 1.17 |
| 0.67 | 2.33  | 1.13 | 1.23 | 0.92 | 0.96 | 0.9   | 1.29 | 1.07 | 2.03 | 0.98 |
| 1.63 | 0.21  | 2.6  | 0.88 | 3.46 | 1.16 | 2.23  | 1.01 | 1.02 | 1.14 | 0.7  |
| 0.5  | 1.25  | 9.92 | 1.97 | 0.73 | 1.9  | 1.29  | 4.48 | 0.73 | 0.15 | 1.65 |
| 1.11 | 1     | 0.96 | 0.99 | 0.83 | 1.07 | 1.44  | 1.01 | 0.93 | 1.57 | 1.26 |
| 2.83 | 0.78  | 0.58 | 0.46 | 0.68 | 1.19 | 3.15  | 2.35 | 0.66 | 2.64 | 0.26 |
| 0.71 | 0.5   | 0.82 | 0.61 | 3.74 | 0.9  | 1.86  | 0.93 | 0.92 | 2.68 | 1    |
| 3.81 | 3.77  | 1.12 | 1.05 | 0.83 | 1.23 | 1.54  | 0.94 | 0.9  | 3.42 | 1.18 |
| 1.73 | 0.73  | 0.51 | 0.39 | 1.52 | 1.09 | 4.72  | 2.06 | 0.58 | 1.15 | 0.32 |
| 0.39 | 1.57  | 2.38 | 2    | 10   | 0.95 | 1.06  | 0.68 | 1.04 | 0.19 | 0.32 |
| 1.23 | 1.09  | 0.86 | 0.71 | 1.25 | 1.62 | 1.73  | 0.45 | 1.05 | 0.77 | 1.69 |
| 0.98 | 0.63  | 3.19 | 1.02 | 1.85 | 1.2  | 0.53  | 1.08 | 0.72 | 1.16 | 0.77 |
| 0.5  | 1.03  | 1.09 | 0.76 | 0.88 | 0.94 | 1.41  | 1.04 | 1.15 | 3.36 | 1.07 |
| 1.74 | 0.72  | 0.67 | 1.04 | 1.23 | 0.97 | 1.46  | 1.29 | 1.11 | 5.94 | 0.75 |
| 0.96 | 2.74  | 1.23 | 0.53 | 1.08 | 1.14 | 0.62  | 1.42 | 1.37 | 0.79 | 1.16 |
| 0.75 | 0.98  | 0.73 | 1.19 | 1.04 | 1.06 | 2.27  | 0.64 | 1.06 | 1.95 | 1.13 |
| 1.32 | 0.98  | 0.23 | 1.85 | 1.23 | 1.01 | 0.77  | 1.09 | 0.9  | 2.3  | 1.05 |
| 0.37 | 2.16  | 2.23 | 0.71 | 0.81 | 0.7  | 1.05  | 0.6  | 0.61 | 2.18 | 1.21 |
| 1.1  | 0.62  | 0.5  | 0.7  | 0.81 | 1.04 | 1.58  | 1.02 | 0.83 | 1.38 | 0.73 |
| 2.27 | 1.47  | 0.41 | 1.06 | 1.37 | 1.09 | 0.66  | 1.06 | 1.25 | 2    | 1.14 |
| 1.47 | 0.02  | 3.62 | 2.64 | 0.82 | 0.8  | 6.62  | 2.17 | 4.17 | 0.12 | 1.82 |
| 1.15 | 1.02  | 1.14 | 1.64 | 1.1  | 0.97 | 0.73  | 1.26 | 1.13 | 2.66 | 1.02 |
| 0.67 | 2.63  | 1.3  | 0.69 | 1.2  | 2.44 | 0.88  | 2.41 | 0.52 | 2.08 | 1.69 |
| 0.97 | 0.74  | NA   | 1.03 | 0.84 | 0.87 | 0.74  | 0.94 | 1.18 | 3.44 | 0.86 |
| 0.78 | 853.2 | 0.62 | 2.47 | 1.09 | 1.11 | 20.89 | 0.9  | 0.99 | 0.66 | 2.35 |
| 0.89 | 0.23  | 5.5  | 0.65 | 1.11 | 1.21 | 0.57  | 1.34 | 1.06 | 0.84 | 0.85 |
| 0.67 | 1.05  | 0.88 | 1.26 | 2.88 | 0.96 | 2.75  | 0.7  | 0.93 | 0.5  | 1.12 |
| 1.23 | 1.03  | 0.95 | 1.05 | 0.74 | 1.07 | 1.02  | 1.1  | 1.03 | 3.3  | 1.25 |
| 0.92 | 1.1   | 1.14 | 0.7  | 4.94 | 1.09 | 1.21  | 2.87 | 0.67 | 2.25 | 1.18 |
| 0.82 | 0.85  | 9.02 | 1.04 | 1.03 | 0.64 | 1.33  | 6.31 | 1.18 | 2.46 | 0.74 |
| 0.73 | 1.15  | 2    | 0.74 | 0.83 | 1.06 | 0.88  | 0.97 | 0.83 | 1.36 | 0.83 |
| 1.91 | 1.84  | 2.81 | 5.18 | 0.75 | 1.4  | 0.84  | 2.32 | 1.44 | 0.43 | 0.25 |



|      |      |       |      |      |      |       |       |      |       |      |
|------|------|-------|------|------|------|-------|-------|------|-------|------|
| 0.94 | 0.75 | 0.66  | 1.99 | 0.77 | 1.09 | 2.88  | 0.53  | 2.36 | 1.18  | 0.92 |
| 1.55 | 2    | 0.08  | 0.85 | 1.26 | 1.33 | 0.27  | 4.88  | 0.97 | 0.04  | 1.5  |
| 29.3 | 0.75 | 2.3   | 0.99 | 0.54 | 1.36 | 1.17  | 1.28  | 1.07 | 1.54  | 0.7  |
| 1.53 | 3.96 | 1.32  | 0.62 | 0.57 | 1.13 | 0.14  | 0.64  | 0.65 | 0.25  | 0.99 |
| 0.68 | 0.89 | 0.64  | 0.9  | 1.26 | 1.14 | 1.72  | 2.2   | 1.04 | 2.36  | 0.6  |
| 0.85 | 1.81 | 1.75  | 1.03 | 0.81 | 1.07 | 1.05  | 2.48  | 0.92 | 0.56  | 1.1  |
| 0.6  | 0.97 | 0.91  | 1    | 0.77 | 0.92 | 0.97  | 0.75  | 1.09 | 0.79  | 0.64 |
| 0.32 | 0.98 | 0.95  | 0.85 | 2.48 | 1.26 | 1.54  | 1.94  | 1.19 | 0.51  | 0.89 |
| 0.79 | 5.05 | 0.46  | 0.57 | 1.19 | 1.55 | 1.42  | 0.53  | 0.45 | 0.95  | 1.99 |
| 4.03 | 1.76 | 5.02  | 1.5  | 1.5  | 1.05 | 1.43  | 1.49  | 0.98 | 2.53  | 0.27 |
| 0.67 | 1.5  | 3     | 1.2  | 1.22 | 0.95 | 1.06  | 1.81  | 0.81 | 0.92  | 1.06 |
| 0.95 | 0.12 | 1     | 0.98 | 1.46 | 1.08 | 0.97  | 1     | 1.08 | 0.82  | 1.25 |
| 0.36 | 0.8  | 1     | 0.16 | 0.59 | 0.93 | 0.4   | 1.21  | 0.81 | 0.25  | 0.95 |
| 0.59 | 0.94 | 1.06  | 0.88 | 0.24 | 1.14 | 2.54  | 3.17  | 0.97 | 0.15  | 0.99 |
| 0.78 | 1.01 | 0.76  | 1.89 | 0.27 | 0.99 | 0.24  | 0.77  | 1.27 | 1.53  | 1.23 |
| 1.54 | 1.26 | 0.28  | 0.81 | 0.48 | 1.02 | 2.96  | 0.97  | 0.95 | 1.42  | 2.06 |
| 0.8  | 0.81 | 1.88  | 0.27 | 1.15 | 1.19 | 0.85  | 1.47  | 0.81 | 0.52  | 0.87 |
| 0.87 | 1.06 | 0.96  | 2.17 | 2.07 | 1.03 | 11.71 | 4.09  | 0.93 | 2.78  | 0.81 |
| 0.51 | 5    | 0.35  | 1.1  | 1.05 | 0.67 | 2.85  | 27.86 | 0.52 | 1.63  | 1.13 |
| 1.1  | 0.62 | 7.67  | 0.32 | 1.58 | 0.29 | 0.58  | 0.52  | 0.82 | 0.21  | 0.69 |
| 0.85 | 3.18 | 0.38  | 0.91 | 3.47 | 0.5  | 0.63  | 1.57  | 2.32 | 2     | 0.89 |
| 1.87 | 0.77 | 0.55  | 0.44 | 1.26 | 1.14 | 2.9   | 2.03  | 0.59 | 2.37  | 0.33 |
| 0.79 | 7.54 | 4.12  | 0.63 | 0.67 | 1.13 | 0.6   | 9.67  | 0.56 | 10.63 | 1.31 |
| 0.12 | 0.68 | 0.13  | 1.08 | 1.03 | 0.39 | 0.61  | 1.5   | 0.75 | 1.43  | 0.73 |
| 0.86 | 0.96 | 1.03  | 0.92 | 1.62 | 1    | 1.19  | 0.72  | 0.97 | 0.89  | 0.92 |
| 1.25 | 0.86 | 31.81 | 1.37 | 0.88 | 1.21 | 1.21  | 1.25  | 1.19 | 1     | 0.8  |
| 1.24 | 0.99 | 1.25  | 0.66 | 1.23 | 1.12 | 1.55  | 0.72  | 0.8  | 0.65  | 2.39 |
| 0.19 | 2.11 | 1.58  | 0.31 | 0.45 | 0.67 | 0.54  | 0.72  | 1.27 | 1.88  | 0.76 |
| 5.07 | 8.32 | 2.44  | 1.64 | 1.02 | 1.16 | 0.79  | 1.53  | 0.52 | 2.49  | 1.49 |
| 9.43 | 0.3  | 3     | 5.27 | 1.64 | 3.55 | 0.79  | 16    | 0.11 | 0.44  | 0.49 |
| 1.27 | 1.04 | 1.16  | 3    | 1.05 | 0.69 | 0.75  | 1.06  | 1.24 | 0.81  | 1.12 |
| 0.83 | 0.89 | 0.88  | 1.37 | 0.84 | 1.04 | 4.06  | 1.31  | 0.75 | 1.53  | 0.64 |
| 0.98 | 0.52 | 0.47  | 3.45 | 0.94 | 1.29 | 1.17  | 1.88  | 1.32 | 0.59  | 0.61 |

|      |      |      |      |      |       |      |      |      |      |      |
|------|------|------|------|------|-------|------|------|------|------|------|
| 0.62 | 0.6  | 0.72 | 0.95 | 0.9  | 0.79  | 0.54 | 0.86 | 1.18 | 11.5 | 1    |
| 0.89 | 1.08 | 3.28 | 0.74 | 1.19 | 0.9   | 1.13 | 1.02 | 1.15 | 1.11 | 1.64 |
| 0.44 | 0.11 | 0.5  | 0.6  | 1.01 | 14.67 | 0.96 | 1.61 | 0.74 | 0.4  | 1.77 |
| 0.09 | 0.22 | 0.12 | 1.31 | 0.7  | 0.71  | 2.64 | 2.95 | 0.94 | 1.05 | 1.6  |
| 2.14 | 0.22 | 1.95 | 2.97 | 1.06 | 1.21  | 1.53 | 0.52 | 0.84 | 1.98 | 0.13 |
| 0.7  | 0.85 | 1.36 | 1.49 | 0.7  | 1.01  | 1.17 | 0.84 | 0.99 | 1.78 | 0.59 |
| 1.07 | 1.86 | 3.04 | 1.1  | 1.09 | 1.09  | 1.33 | 0.94 | 0.87 | 1.41 | 0.98 |
| 1.32 | 1.45 | 0.39 | 1.11 | 1.47 | 0.94  | 1.03 | 1.16 | 1.04 | 6.72 | 0.65 |
| 1.13 | 0.51 | 1.5  | 0.97 | 0.88 | 1.27  | 1.85 | 1.08 | 1.12 | 1.42 | 0.89 |
| 1.82 | 1.3  | 2.32 | 1.15 | 1.25 | 1.06  | 3.85 | 2.37 | 0.89 | 0.58 | 1.16 |
| 3.87 | 0.72 | 6.81 | 1.72 | 0.88 | 1.24  | 0.64 | 0.67 | 1.03 | 1.46 | 0.72 |
| 2.75 | 1.01 | 0.19 | 0.1  | 0.31 | 23.1  | 0.57 | 0.39 | 0.3  | 1.02 | 6.25 |
| 1.28 | 1.61 | 1.34 | 0.99 | 0.69 | 0.94  | 1.42 | 0.86 | 1.42 | 1.21 | 1.47 |
| 1    | 0    | 0    | 4.4  | 0.86 | 1.09  | 1.82 | 0.45 | 1.67 | 130  | 1.49 |

| 204798_at | 202326_at | 220200_s_at | 207545_s_at | 211012_s_at | 220104_at | 221645_s_at | 205289_at | 207347_at | 204086_at | 213720_s_at |
|-----------|-----------|-------------|-------------|-------------|-----------|-------------|-----------|-----------|-----------|-------------|
| 1.93      | 1.03      | 0.99        | 0.95        | 1.39        | 1.65      | 0.92        | 2.27      | 1.13      | 1.16      | 0.97        |
| 1.54      | 1.05      | 1.14        | 1.8         | 0.76        | 1.18      | 1.55        | 1.57      | 1.06      | 1.25      | 1.06        |
| 1.06      | 1.23      | 0.81        | 1.16        | 0.65        | 1.34      | 3.21        | 3.6       | 1.52      | 1.27      | 0.84        |
| 1.04      | 1.18      | 0.97        | 1.59        | 1.88        | 1.21      | 1.42        | 4.64      | 1.29      | 2.22      | 1.01        |
| 1.16      | 0.83      | 1.06        | 1.09        | 1.41        | 1.75      | 0.93        | 0.67      | 1.09      | 1.84      | 0.88        |
| 0.7       | 1.59      | 3.27        | 1.21        | 0.81        | 1.12      | 0.87        | 3.04      | 1.93      | 1.95      | 1           |
| 0.07      | 4         | 1.43        | 1.17        | 1.25        | 0.47      | 0.67        | 4.2       | 1.91      | 0.72      | 0.96        |
| 0.9       | 0.92      | 0.99        | 0.63        | 0.99        | 1.09      | 1.19        | 0.97      | 1.07      | 0.88      | 1.12        |
| 0.6       | 0.74      | 0.92        | 1.04        | 1.09        | 1.24      | 0.68        | 0.98      | 1.05      | 1.56      | 0.83        |
| 0.27      | 0.45      | 1.76        | 1.13        | 7.93        | 36.31     | 0.81        | 7.91      | 0.76      | 0.62      | 0.69        |
| 1.17      | 1.01      | 1.07        | 1           | 0.45        | 1.33      | 1.16        | 1.41      | 1.01      | 2.69      | 1.18        |
| 1.25      | 1.14      | 1.27        | 0.95        | 0.68        | 0.78      | 0.79        | 1.28      | 0.92      | 1.09      | 1.02        |
| 0.85      | 0.88      | 1.19        | 1.08        | 0.93        | 1.04      | 0.85        | 1.52      | 0.9       | 2.16      | 0.98        |
| 2.15      | 0.11      | 1.98        | 0.16        | 0.35        | 1.2       | 0.04        | 581.77    | 1.05      | 0.17      | 0.24        |
| 0.85      | 1.98      | 2.01        | 1.15        | 0.66        | 0.26      | 2.13        | 1.45      | 1.27      | 4.17      | 0.84        |
| 1.76      | 0.99      | 0.96        | 1.26        | 0.68        | 1.33      | 1.32        | 0.86      | 1.06      | 1.29      | 1           |
| 2.98      | 1.32      | 1           | 1.33        | 1.9         | 0.62      | 1.18        | 1.35      | 0.86      | 3.58      | 1.53        |
| 4.28      | 1.29      | 1.3         | 1.06        | 1.29        | 1.25      | 1.04        | 1.39      | 1.11      | 1.51      | 1.28        |
| 0.53      | 1.97      | 0.74        | 1.38        | 0.15        | 1.69      | 1.22        | 0.8       | 1.25      | 0.78      | 0.78        |
| 1.27      | 0.26      | 1.08        | 2.17        | 3.92        | 1.31      | 1.53        | 8.54      | 1.29      | 1.44      | 1.12        |
| 1.26      | 7.62      | 0.28        | 0.4         | 2.3         | 1.59      | 0.53        | 2.35      | 1.06      | 2.58      | 1.22        |
| 2.98      | 1.77      | 0.95        | 0.58        | 3.24        | 2.62      | 0.91        | 0.78      | 2.61      | 1.09      | 1.53        |
| 1.57      | 1.14      | 0.52        | 0.74        | 0.94        | 0.79      | 0.95        | 0.84      | 0.9       | 11.95     | 0.94        |
| 1.07      | 1.42      | 0.95        | 1.97        | 1.57        | 1.1       | 0.81        | 3.85      | 2.29      | 1.23      | 0.88        |
| 0.04      | 1.25      | 0.47        | 1.15        | 7.42        | 1.06      | 0.06        | 0.06      | 1.21      | 16.08     | 0.04        |
| 0.44      | 1.06      | 1           | 1.39        | 0.95        | 0.56      | 1.37        | 0.9       | 1.52      | 1.45      | 0.81        |
| 10.86     | 1.05      | 1.04        | 0.39        | 1.22        | 1.78      | 1.34        | 3.94      | 1.05      | 1.18      | 0.74        |
| 1.54      | 1.25      | 1.01        | 1.18        | 24.79       | 1.24      | 1           | 5.82      | 2.03      | 0.61      | 0.75        |
| 3.77      | 0.82      | 1.15        | 0.77        | 1.81        | 1.3       | 0.81        | 2.36      | 1.5       | 0.39      | 1.51        |
| 0.91      | 0.79      | 1.43        | 0.98        | 1.18        | 1.35      | 1.38        | 1.91      | 0.91      | 1.24      | 0.91        |

|       |      |      |      |      |      |       |        |      |       |      |
|-------|------|------|------|------|------|-------|--------|------|-------|------|
| 0.75  | 0.71 | 1.33 | 0.71 | 1.05 | 1.2  | 0.76  | 2.96   | 0.66 | 1.42  | 1.04 |
| 1.25  | 0.85 | 1.08 | 1.15 | 0.96 | 3.97 | 0.79  | 926.27 | 0.9  | 2.93  | 5.81 |
| 0.95  | 0.96 | 0.85 | 0.99 | 2    | 1.06 | 1.12  | 0.89   | 1.2  | 1.5   | 1.1  |
| 6.78  | 0.73 | 1.73 | 0.6  | 0.27 | 1.55 | 0.64  | 0.39   | 0.91 | 0.96  | 0.77 |
| 0.86  | 1.04 | 1.63 | 3.2  | 1.67 | 0.98 | 4.78  | 0.62   | 1.21 | 1.58  | 0.2  |
| 1.55  | 1.18 | 0.27 | 1.23 | 0.44 | 4.42 | 1.1   | 23.53  | 1.14 | 2     | 1.06 |
| 1.17  | 1.72 | 0.54 | 0.46 | 0.8  | 1.73 | 0.31  | 30.85  | 0.93 | 27.49 | 1.41 |
| 0.8   | 1.17 | 0.99 | 0.83 | 0.5  | 2.32 | 0.76  | 0.98   | 1.22 | 0.58  | 0.88 |
| 0.37  | 1    | 0.67 | 0.93 | 1.65 | 0.66 | 0.19  | 0.6    | 0.57 | 1.47  | 0.85 |
| 0.03  | 0.86 | 0.72 | 1.25 | 3.12 | 0.91 | 1.7   | 5.44   | 2.9  | 4.43  | 0.95 |
| 1.11  | 1.22 | 0.98 | 0.96 | 1.44 | 0.87 | 1.65  | 0.8    | 0.8  | 1.71  | 1.07 |
| 0.99  | 1.14 | 0.91 | 0.87 | 0.98 | 0.96 | 0.94  | 0.47   | 1.18 | 1.38  | 1.13 |
| 1.06  | 0.35 | 0.57 | 4.99 | 0.69 | 1.37 | 4.87  | 3.23   | 1.35 | 0.18  | 0.9  |
| 1.51  | 0.23 | 1.24 | 1.75 | 0.75 | 0.62 | 1.19  | 3.66   | 1    | 2.18  | 0.53 |
| 0.92  | 0.5  | 0.62 | 3.31 | 0.67 | 1.45 | 3.01  | 2.07   | 1.32 | 0.13  | 0.93 |
| 1.35  | 0.94 | 0.76 | 1.58 | 1.8  | 1.08 | 2.03  | 2.13   | 1.24 | 0.95  | 0.81 |
| 1.04  | 1.27 | 0.98 | 1.28 | 0.59 | 0.42 | 1.12  | 1.13   | 1.03 | 1.35  | 0.99 |
| 1.25  | 1.93 | 1.97 | 1.09 | 2.39 | 0.87 | 1.35  | 1.12   | 0.82 | 0.88  | 0.88 |
| 0.85  | 0.88 | 1.06 | 1.04 | 0.78 | 0.91 | 1.08  | 0.98   | 1.02 | 0.91  | 0.97 |
| 2.38  | 0.73 | 1.21 | 2.14 | 1.19 | 1.46 | 1.18  | 2.19   | 0.95 | 1.26  | 1.53 |
| 0.86  | 0.91 | 0.65 | 0.92 | 0.68 | 0.86 | 1.11  | 0.75   | 0.73 | 1.14  | 0.84 |
| 1.71  | 1.13 | 1.06 | 0.75 | 2.01 | 0.9  | 0.86  | 1.18   | 1.06 | 2.7   | 1.02 |
| 1.15  | 1.13 | 1.08 | 1.07 | 0.53 | 0.46 | 0.89  | 1.29   | 1.17 | 2.55  | 1    |
| 1.05  | 1.35 | 1.68 | 1.05 | 0.93 | 1.09 | 1.47  | 0.71   | 1.05 | 1.72  | 1.15 |
| 0.79  | 0.53 | 0.65 | 1.93 | 1.24 | 0.86 | 0.69  | 5.35   | 1.81 | 2     | 1.05 |
| 23.86 | 1.03 | 1.41 | 0.58 | 1.14 | 4.15 | 1     | 1.34   | 1.1  | 2.03  | 0.86 |
| 0.68  | 0.98 | 1.28 | 2.69 | 1.53 | 1.52 | 0.57  | 43.86  | 0.8  | 0.43  | 1.24 |
| 1.75  | 1.33 | 1.03 | 0.85 | 1.63 | 1.62 | 35.53 | 0.38   | 1.88 | 1.03  | 1.18 |
| 0.54  | 0.86 | 0.79 | 1.08 | 0.74 | 1.14 | 2     | 0.93   | 0.99 | 4.5   | 1.2  |
| 1.23  | 0.33 | 0.49 | 4.6  | 0.8  | 2.04 | 2.74  | 1.63   | 1.09 | 0.17  | 1.06 |
| 0.8   | 0.72 | 1.5  | 1.07 | 4.06 | 1.41 | 1     | 8.1    | 1.03 | 0.99  | 1.1  |
| 1.05  | 0.88 | 0.88 | 0.91 | 1.49 | 2.23 | 1.22  | 0.35   | 1.67 | 0.68  | 1.28 |
| 0.6   | 1.01 | 1.04 | 0.94 | 3.67 | 1.48 | 0.94  | 0.61   | 1.22 | 4.51  | 0.95 |

|       |      |      |      |      |      |       |       |      |      |       |
|-------|------|------|------|------|------|-------|-------|------|------|-------|
| 2     | 0.73 | 0.98 | 1.2  | 0.84 | 1.34 | 1.22  | 1.14  | 0.99 | 0.31 | 1.01  |
| 2.41  | 1.16 | 1.33 | 0.98 | 1.38 | 2.47 | 1.37  | 1.71  | 1.31 | 1.41 | 1.31  |
| 0.96  | 1.26 | 1.14 | 1.02 | 0.97 | 0.7  | 1.36  | 1.05  | 1.02 | 1.5  | 0.95  |
| 1.64  | 1.27 | 1.03 | 1.34 | 2.25 | 0.96 | 2.46  | 2.15  | 1.13 | 4.05 | 2.17  |
| 0.88  | 0.69 | 1.13 | 1.11 | 1    | 0.8  | 1.35  | 0.9   | 1.07 | 1.05 | 0.85  |
| 0.99  | 1.3  | 1.4  | 1.7  | 0.59 | 0.8  | 0.55  | 2.06  | 0.92 | 0.79 | 1.21  |
| 0.43  | 1.82 | 1.75 | 0.95 | 0.87 | 1.53 | 2.21  | 1.71  | 1.3  | 0.92 | 0.84  |
| 0.72  | 1.96 | 1.64 | 0.9  | 1.47 | 0.87 | 0.92  | 0.66  | 1.17 | 2.12 | 0.91  |
| 0.73  | 1.37 | 1.61 | 1.05 | 1.17 | 0.39 | 0.82  | 1.09  | 0.54 | 1.46 | 0.75  |
| 1.46  | 0.62 | 0.57 | 1.37 | 1.37 | 0.6  | 1.46  | 1.92  | 0.88 | 1.18 | 1.91  |
| 2.23  | 1.36 | 3.66 | 0.91 | 0.75 | 1.34 | 1.14  | 7.31  | 1.38 | 2.99 | 0.95  |
| 1.47  | 2.18 | 1.18 | 1.1  | 1.77 | 1.45 | 1.05  | 1     | 1.47 | 0.92 | 0.81  |
| 0.83  | 0.61 | 2.16 | 0.98 | 1.26 | 2.58 | 1.39  | 3     | 0.98 | 0.98 | 0.98  |
| 1.41  | 1.41 | 1.39 | 2.07 | 1.43 | 1.14 | 1.16  | 16.57 | 0.89 | 2.1  | 1.16  |
| 1.29  | 1.38 | 0.87 | 0.75 | 2.02 | 1.06 | 0.67  | 1.47  | 0.93 | 0.79 | 1.24  |
| 0.14  | 0.09 | 0.2  | 1.17 | 4.34 | 2    | 39.78 | 3.38  | 0.51 | 0.88 | 15.25 |
| 0.33  | 0.74 | 1.06 | 1.33 | 0.38 | 0.76 | 1.93  | 1.04  | 1.03 | 1.65 | 0.73  |
| 2.86  | 1.02 | 0.34 | 0.88 | 0.62 | 2.17 | 1.1   | 1.93  | 1.17 | 0.67 | 1.58  |
| 0.85  | 0.84 | 1.02 | 1.89 | 1.49 | 1.49 | 1.21  | 1.31  | 1.86 | 1.39 | 0.93  |
| 0.8   | 5    | 0.8  | 1.16 | 6.78 | 0.89 | 0.76  | 3.88  | 1.78 | 1.8  | 1.02  |
| 0.73  | 0.45 | 0.51 | 1.96 | 6.47 | 5.65 | 0.69  | 4.09  | 1.11 | 0.45 | 1.75  |
| 1.35  | 1.02 | 1    | 0.72 | 1.18 | 1.07 | 1.32  | 0.72  | 0.88 | 3.44 | 1.16  |
| 0.21  | 5.38 | 1.06 | 1.12 | 0.98 | 0.51 | 0.86  | 5.77  | 1.66 | 0.47 | 0.89  |
| 39.08 | 2.27 | 2.37 | 0.69 | 0.64 | 1.5  | 0.75  | 2.49  | 1.17 | 1.83 | 1.14  |
| 0.87  | 0.95 | 0.98 | 1.06 | 0.95 | 1.81 | 1.31  | 1.69  | 1.02 | 2.31 | 0.87  |
| 0.65  | 0.76 | 1.16 | 0.92 | 0.81 | 0.77 | NA    | 0.98  | 0.79 | 0.9  | 0.77  |
| 0.9   | 1.37 | 0.94 | 0.78 | 1.37 | 1.15 | 0.79  | 0.89  | 0.81 | 1.05 | 1.16  |
| 0.95  | 0.93 | 0.97 | 1.12 | 0.82 | 1.19 | 1.1   | 0.49  | 0.98 | 1.43 | 1.05  |
| 0.91  | 0.83 | 0.93 | 1.29 | 1.85 | 2.06 | 1.2   | 2.35  | 0.94 | 1.25 | 0.94  |
| 1.2   | 1.06 | 0.94 | 0.94 | 1.36 | 0.9  | 0.97  | 6.95  | 0.78 | 0.91 | 0.96  |
| 0.92  | 1.06 | 1.08 | 1.23 | 1.17 | 1.12 | 0.96  | 1.52  | 0.75 | 1.03 | 0.99  |
| 0.78  | 0.62 | 0.76 | 0.74 | 0.97 | 0.91 | 0.67  | 1.73  | 1.24 | 0.8  | 1.06  |
| 0.95  | 0.73 | 0.99 | 1.64 | 1.22 | 1.86 | 1.37  | 1.67  | 1.54 | 6.19 | 0.91  |

|      |      |      |      |      |      |      |      |      |       |      |
|------|------|------|------|------|------|------|------|------|-------|------|
| 1.19 | 1.53 | 1.09 | 0.71 | 1.72 | 0.29 | 1.03 | 2.06 | 0.93 | 1.31  | 1.05 |
| 0.82 | 1.02 | 0.8  | 1.03 | 2.25 | 0.94 | 0.63 | 0.53 | 0.6  | 0.71  | 0.88 |
| 1.09 | 1.03 | 1.16 | 0.72 | 0.95 | 0.83 | 0.96 | 0.83 | 1.08 | 0.54  | 1.03 |
| 0.89 | 1.27 | 1.11 | 0.93 | 0.86 | 1.29 | 0.71 | 2.11 | 0.56 | 1.32  | 0.63 |
| 1.67 | 0.89 | 1.37 | 1.4  | 0.84 | 0.82 | 0.28 | 4.65 | 0.9  | 1.01  | 1.34 |
| 0.71 | 0.66 | 1.44 | 0.16 | 1.65 | 0.56 | 0.11 | 3.04 | 1.15 | 2.54  | 0.77 |
| 0.76 | 0.92 | 1.54 | 1.25 | 3.18 | 6.31 | 1.08 | 1.62 | 1.15 | 1.99  | 0.97 |
| 1.27 | 0.57 | 0.53 | 1.33 | 0.95 | 0.91 | 1.02 | 2.16 | 1.31 | 1.07  | 0.71 |
| 0.49 | 0.77 | 1.21 | 0.84 | 0.83 | 1.1  | 1.42 | 9.29 | 1.31 | 5.65  | 0.9  |
| 0.82 | 0.9  | 1.22 | 1.38 | 1.41 | 0.78 | 1.43 | 7.67 | 0.9  | 2.77  | 0.81 |
| 2.41 | 1.61 | 1.03 | 1.05 | 0.98 | 0.92 | 0.78 | 1.05 | 0.9  | 1.27  | 0.96 |
| 1.99 | 0.92 | 0.99 | 0.9  | 0.54 | 0.94 | 0.97 | 3.71 | 1.05 | 1.03  | 1.04 |
| 1.56 | 0.76 | 1.08 | 0.87 | 1.06 | 1.26 | 0.99 | 5.54 | 1.19 | 2.68  | 0.77 |
| 5.13 | 1.19 | 1.21 | 0.91 | 1.18 | 2.15 | 0.77 | 0.76 | 1.23 | 1.13  | 0.94 |
| 0.91 | 0.9  | 0.95 | 1.26 | 2.76 | 1.61 | 1.41 | 0.93 | 1.29 | 0.78  | 1.03 |
| 0.96 | 1.07 | 1.72 | 1.09 | 1.73 | 0.94 | 1.12 | 2.67 | 1.26 | 1.51  | 1.28 |
| 1    | 0.87 | 0.77 | 0.89 | 1.06 | 0.51 | 1.15 | 0.15 | 0.95 | 1.08  | 0.97 |
| 1.39 | 1.31 | 1.22 | 1.22 | 1.98 | 1.08 | 3.84 | 9.91 | 1.25 | 9.04  | 2.1  |
| 0.88 | 1.07 | 0.96 | 0.87 | 1.38 | 1.85 | 0.64 | 2.72 | 1.33 | 6.49  | 0.99 |
| 2.12 | 1.13 | 1.19 | 1.77 | 0.36 | 1.72 | 0.88 | 0.5  | 1.2  | 1.28  | 1.09 |
| 0.47 | 0.99 | 0.8  | 1.79 | 0.73 | 1.02 | 1    | 0.96 | 1.29 | 0.84  | 0.85 |
| 0.94 | 0.89 | 1.41 | 0.88 | 1.34 | 0.77 | 0.94 | 6.72 | 1.11 | 0.74  | 1.1  |
| 1.34 | 1.06 | 0.92 | 1.2  | 2.63 | 1.1  | 1.15 | 0.99 | 0.98 | 0.97  | 1.1  |
| 0.69 | 1.54 | 0.78 | 1.47 | 0.62 | 0.83 | 3.39 | 1.24 | 1.45 | 15.13 | 1.27 |
| 1.25 | 1.32 | 1.24 | 0.5  | 1.13 | 0.93 | 1.53 | 1.61 | 0.71 | 0.72  | 1.01 |
| 1.44 | 0.72 | 0.53 | 1.46 | 1.25 | 1.59 | 1.03 | 2    | 0.97 | 1.27  | 0.98 |
| 1.02 | 0.98 | 0.88 | 0.97 | 7    | 1.35 | 1.08 | 5.33 | 0.97 | 0.67  | 0.83 |
| 2.5  | 1.05 | 0.93 | 1.11 | 1.57 | 0.8  | 1.22 | 5.21 | 0.71 | 1.27  | 1.07 |
| 1.39 | 0.88 | 1.65 | 0.97 | 1.99 | 1.3  | 0.45 | 0.29 | 0.73 | 3.21  | 1.09 |
| 0.94 | 0.8  | 0.95 | 1.22 | 1.07 | 1.12 | 0.95 | 0.81 | 0.87 | 1.77  | 0.96 |
| 0.82 | 1.04 | 1.15 | 1    | 1.04 | 1.34 | 1.12 | 0.73 | 0.62 | 1.52  | 0.98 |
| 2.41 | 1.16 | 1.33 | 0.98 | 1.38 | 2.47 | 1.37 | 1.71 | 1.31 | 1.41  | 1.31 |
| 0.7  | 1.04 | 1.14 | 1.55 | 1.07 | 1.15 | 1.06 | 2.14 | 1.31 | 0.94  | 0.82 |

|      |      |      |      |      |      |      |      |      |      |      |
|------|------|------|------|------|------|------|------|------|------|------|
| 1.47 | 1.04 | 0.92 | 1.05 | 1.12 | 0.82 | 1.09 | 2.81 | 0.87 | 1.04 | 0.84 |
| 0.67 | 1.12 | 1.2  | 1.09 | 1.88 | 1.13 | 0.86 | 3.71 | 1.62 | 2.71 | 1.07 |
| 0.75 | 0.71 | 0.96 | 1.09 | 0.94 | 2.81 | 0.93 | 1.23 | 0.83 | 1    | 0.93 |
| 0.99 | 0.89 | 1.04 | 0.89 | 0.84 | 1.11 | 1.34 | 1.32 | 1.47 | 2.18 | 0.95 |
| 0.4  | 0.88 | 1.1  | 0.72 | 0.82 | 1.07 | 0.61 | 0.69 | 1.08 | 2.05 | 0.9  |
| 0.52 | 1.35 | 1.02 | 0.91 | 0.78 | 0.88 | 1.04 | 0.61 | 1.17 | 0.97 | 1.17 |
| 0.84 | 0.76 | 0.75 | 1.13 | 1.07 | 1.45 | 1.09 | 2.44 | 0.96 | 1.03 | 1.08 |
| 0.99 | 0.68 | 0.9  | 1.5  | 0.86 | 1.27 | 0.88 | 1.15 | 1.05 | 1.02 | 0.89 |
| 1.4  | 1.07 | 1.16 | 1.57 | 1.23 | 3.22 | 0.98 | 0.35 | 0.41 | 1.29 | 1.01 |
| 0.87 | 1.36 | 0.87 | 1.08 | 0.97 | 1.29 | 1.21 | 0.66 | 1.09 | 0.61 | 0.97 |
| 0.42 | 0.86 | 1.37 | 1    | 2.88 | 2.14 | 0.68 | 1.35 | 0.61 | 2.11 | 1.02 |
| 1.04 | 0.85 | 1.8  | 0.85 | 5.61 | 1.51 | 0.84 | 0.86 | 0.63 | 0.84 | 0.79 |
| 1.5  | 1.26 | 1.1  | 1.23 | 3.17 | 1.47 | 3.36 | 2.4  | 1.27 | 5.96 | 2.24 |
| 0.85 | 0.98 | 0.81 | 1.32 | 3.76 | 1.74 | 4.96 | 1.35 | 1.01 | 1.15 | 0.89 |
| 1.22 | 0.2  | 0.42 | 1.51 | 0.95 | 1.3  | 0.53 | 1.11 | 0.76 | 1.07 | 0.78 |
| 1.09 | 1.04 | 1.09 | 1.3  | 1.17 | 1.77 | 0.98 | 1    | 1.22 | 1.1  | 0.92 |
| 0.83 | 0.79 | 0.79 | 1.27 | 0.7  | 0.95 | 1.1  | 5.64 | 1.16 | 0.98 | 0.96 |
| 1.33 | 1.25 | 0.95 | 0.75 | 1.19 | 0.88 | 1.05 | 1.61 | 0.97 | 1.11 | 1.48 |
| 0.95 | 1.06 | 1    | 0.93 | 0.94 | 1.16 | 0.74 | 1.22 | 0.92 | 1.06 | 1    |
| 0.35 | 0.88 | 0.87 | 0.87 | 0.97 | 1.06 | 1.43 | 0.26 | 1.18 | 0.96 | 0.64 |
| 0.24 | 0.63 | 1.1  | 0.93 | 0.94 | 0.63 | 0.87 | 5.47 | 1.12 | 2.25 | 1.07 |
| 0.19 | 1.04 | 0.67 | 0.97 | 4.39 | 0.98 | 1.7  | 0.94 | 0.79 | 3.06 | 1.43 |
| 1.29 | 1.19 | 1.11 | 1.11 | 1.27 | 1.19 | 1.09 | 1.55 | 1.07 | 1.84 | 1.07 |
| 1.41 | 0.9  | 0.89 | 0.91 | 1.41 | 0.85 | 1.11 | 0.44 | 0.78 | 3.78 | 1.13 |
| 0.53 | 0.56 | 0.75 | 0.72 | 0.99 | 0.8  | 1.16 | 0.7  | 0.97 | 0.87 | 0.8  |
| 4.45 | 0.87 | 0.79 | 0.97 | 1.07 | 0.88 | 2.29 | 0.74 | 0.85 | 1.32 | 1.15 |
| 0.86 | 1.28 | 1.02 | 1.32 | 1.5  | 1.88 | 1    | 0.9  | 0.85 | 1.14 | 1    |
| 0.67 | 0.48 | 0.86 | 1.13 | 0.77 | 1.36 | 1    | 2.28 | 0.97 | 1.33 | 0.82 |
| 0.87 | 0.81 | 0.97 | 1.23 | 1.66 | 1.3  | 1.19 | 0.97 | 1.26 | 1.09 | 0.9  |
| 0.48 | 0.6  | 0.82 | 1.11 | 1.09 | 2.75 | 0.85 | Inf  | 1.01 | 1.06 | 0.82 |
| 0.85 | 1.28 | 0.88 | 1.17 | 0.89 | 1.12 | 1.17 | 4.4  | 1.02 | 1.5  | 1.11 |
| 0.96 | 0.97 | 0.95 | 1.02 | 1.07 | 1.09 | 1.07 | Inf  | 1.09 | 0.9  | 0.9  |
| 0.99 | 1.15 | 0.96 | 1.09 | 1.35 | 0.96 | 1.06 | 3.17 | 0.89 | 0.86 | 1.06 |

|       |      |      |      |      |      |      |       |      |      |       |
|-------|------|------|------|------|------|------|-------|------|------|-------|
| 0.97  | 1.24 | 0.97 | 0.49 | 2.43 | 0.78 | 0.9  | 0.49  | 0.47 | 0.68 | 1.04  |
| 1.08  | 1.34 | 0.92 | 1.08 | 0.97 | 1    | 1.17 | 4.21  | 0.92 | 2.48 | 1.11  |
| 1.01  | 1.02 | 1.08 | 0.98 | 1.04 | 1.03 | 0.89 | 0.94  | 0.91 | 0.45 | 1.11  |
| 2.34  | 0.35 | 0.7  | 1.52 | 2.85 | 1.31 | 1.33 | 1.5   | 1.39 | 0.33 | 0.87  |
| 2.98  | 1    | 1.15 | 0.42 | 1.27 | 0.72 | 0.59 | 7.09  | 1.25 | 1.36 | 0.96  |
| 0.99  | 1    | 0.87 | 0.99 | 1.21 | 1.06 | 0.85 | 1.23  | 0.87 | 1.99 | 0.97  |
| 0.81  | 0.66 | 1.28 | 0.67 | 1.08 | 1.27 | 0.81 | 3.06  | 0.66 | 1    | 1.06  |
| 0.94  | 0.91 | 0.99 | 0.72 | 5.91 | 1.96 | 0.97 | 0.95  | 1.02 | 1.16 | 1.16  |
| 1.8   | 1.31 | 1.12 | 0.89 | 1.84 | 1.53 | 1.4  | 11.05 | 0.86 | 1.07 | 0.97  |
| 0.81  | 0.74 | 1.41 | 0.57 | 1.01 | 1.33 | 0.77 | 2.01  | 0.63 | 2.09 | 1.02  |
| 2.28  | 0.86 | 1.01 | 0.84 | 1.15 | 1.23 | 0.47 | 1.27  | 1.29 | 2.1  | 1.27  |
| 0.91  | 1.57 | 0.95 | 2    | 0.68 | 0.56 | 1.15 | 2.13  | 0.62 | 0.51 | 1.04  |
| 0.79  | 0.74 | 0.76 | 0.78 | 0.46 | 0.86 | 0.41 | 0.58  | 1.24 | 1.07 | 1.06  |
| 0.98  | 0.9  | 0.98 | 0.98 | 1.12 | 0.59 | 0.77 | 0.91  | 0.83 | 0.84 | 0.99  |
| 1.07  | 0.91 | 1.03 | 0.99 | 0.87 | 1.1  | 1.52 | 2.23  | 1.42 | 1.45 | 0.86  |
| 0.67  | 1.53 | 2.86 | 0.87 | 0.91 | 1.5  | 0.91 | 1.23  | 1.13 | 0.67 | 0.97  |
| 0.83  | 1.14 | 0.94 | 1.04 | 1.31 | 1.16 | 1.2  | 2.54  | 0.95 | 0.93 | 1.1   |
| 0.92  | 0.75 | 1.04 | 0.95 | 1    | 0.99 | 0.84 | 2.49  | 0.86 | 1.42 | 0.93  |
| 1.37  | 1.16 | 0.57 | 0.86 | 0.75 | 0.9  | 1.25 | 0.54  | 0.64 | 2.48 | 1.24  |
| 1.19  | 0.72 | 1.58 | 0.94 | 0.41 | 0.57 | 1.29 | 0.52  | 1.34 | 1.24 | 1.05  |
| 1.35  | 1    | 1.12 | 1.02 | 0.91 | 1.33 | 0.66 | 0.28  | 0.85 | 1.06 | 1.15  |
| 5.83  | 3.23 | 1.25 | 0.5  | 2.06 | 0.49 | 0.37 | 0.37  | 1.16 | 0.03 | 0.7   |
| 1.07  | 0.98 | 1.05 | 1.06 | 1.26 | 0.87 | 0.85 | 2.43  | 0.88 | 1.08 | 1.02  |
| 0.88  | 1.15 | 1.2  | 0.63 | 0.53 | 0.87 | 0.85 | 0.59  | 0.8  | 0.75 | 0.68  |
| 0.81  | 0.97 | 0.74 | 0.92 | 0.98 | 0.85 | 1.37 | 1.6   | 1.09 | 1.14 | 0.98  |
| 1.97  | 0.7  | 0.78 | 0.77 | 1.44 | 0.94 | 0.7  | 3.61  | 0.86 | 0.01 | 13.04 |
| 0.87  | 0.86 | 1.45 | 1.38 | 0.62 | 1.23 | 1.53 | 1.75  | 1.08 | 0.94 | 1.27  |
| 1.04  | 1.67 | 1    | 0.9  | 1.3  | 1.14 | 0.82 | 2.11  | 1.01 | 3.51 | 1.1   |
| 0.99  | 0.94 | 0.79 | 1.08 | 1.47 | 1.15 | 0.99 | 1.44  | 0.97 | 0.83 | 0.94  |
| 0.99  | 0.95 | 0.98 | 0.79 | 2.73 | 0.89 | 1.03 | 0.36  | 0.83 | 0.81 | 1.08  |
| 0.96  | 0.83 | 1.05 | 1.23 | 4.76 | 1.64 | 1.39 | 0.45  | 1.16 | 0.76 | 0.86  |
| 0.79  | 0.67 | 0.9  | 0.76 | 1.21 | 0.95 | 0.86 | 0.75  | 0.9  | 1    | 0.84  |
| 10.67 | 1    | 1.04 | 0.67 | 2.45 | 1.83 | 0.7  | 2.44  | 1.5  | 1.16 | 0.87  |



|       |      |      |      |      |      |      |      |      |      |      |
|-------|------|------|------|------|------|------|------|------|------|------|
| 0.46  | 1.05 | 0.87 | 1.53 | 1.5  | 1.62 | 0.78 | 1.09 | 1.25 | 1.11 | 0.84 |
| 1.35  | 2.1  | 1.24 | 0.97 | 1.57 | 0.89 | 0.99 | 0.4  | 1.81 | 1.36 | 0.98 |
| 0.62  | 1.05 | 0.86 | 0.94 | 2.09 | 0.87 | 6.85 | 0.77 | 0.93 | 2.41 | 1.33 |
| 0.54  | 0.62 | 1.19 | 0.77 | 0.45 | 1.03 | 0.65 | 3.36 | 0.39 | 0.87 | 0.7  |
| 0.98  | 1.15 | 1.17 | 0.9  | 1.06 | 0.84 | 1.49 | 1.39 | 1.05 | 0.89 | 1.16 |
| 0.85  | 0.63 | 0.96 | 1.07 | 0.83 | 1.06 | 1.21 | 0.85 | 0.77 | 1    | 0.99 |
| 0.45  | 0.68 | 0.74 | 1.41 | 1.04 | 0.8  | 2.22 | 1.2  | 1.16 | 0.65 | 0.73 |
| 0.77  | 0.89 | 1.2  | 1.28 | 0.32 | 0.97 | 0.91 | 8.67 | 0.97 | 0.49 | 0.92 |
| 0.86  | 1.35 | 1.32 | 0.47 | 1.05 | 0.26 | 0.74 | 0.56 | 0.59 | 1.08 | 0.86 |
| 0.69  | 0.74 | 0.76 | 1.49 | 0.81 | 1.21 | 1    | 1.19 | 1.08 | 1.59 | 0.57 |
| 0.93  | 0.71 | 1.36 | 1.07 | 0.73 | 0.86 | Inf  | 3.05 | 1.02 | 1    | 0.68 |
| 1.03  | 0.95 | 1.06 | 1.26 | 0.7  | 0.75 | 1.31 | 0.46 | 0.9  | 1.06 | 0.94 |
| 0.71  | 1.3  | 0.81 | 0.84 | 1.39 | 0.6  | 0.8  | 1.39 | 0.81 | 3.5  | 1.01 |
| 0.81  | 1.16 | 1.07 | 1.34 | 1.28 | 1.4  | 1.1  | 1.97 | 0.84 | 1.43 | 1.07 |
| 0.46  | 0.81 | 1.23 | 1.03 | 1.01 | 1.74 | 0.96 | 1.47 | 1.01 | 1.5  | 0.81 |
| 0.87  | 0.84 | 1.04 | 0.63 | 1.05 | 0.84 | 0.71 | 3.21 | 1.24 | 0.71 | 1.22 |
| 0.79  | 1.37 | 1.02 | 0.95 | 0.88 | 0.65 | 0.93 | 2.28 | 1.32 | 1.32 | 1.15 |
| 0.67  | 0.72 | 0.89 | 0.93 | 3.59 | 1.34 | 1.26 | 0.96 | 0.8  | 0.63 | 0.94 |
| 0.48  | 0.57 | 2.87 | 0.82 | 0.95 | 1.44 | 0.49 | 7.67 | 1.5  | 0.87 | 0.83 |
| 0.42  | 0.47 | 0.66 | 0.71 | 1.73 | 2.42 | 2.67 | 0.68 | 2.6  | 1.14 | 0.82 |
| 1.57  | 0.92 | 0.95 | 0.78 | 1.2  | 0.64 | 1.4  | 2.1  | 0.84 | 1.22 | 1.01 |
| 0.76  | 0.75 | 1.39 | 0.66 | 1.02 | 1.22 | 0.74 | 2.43 | 0.65 | 1.97 | 1.02 |
| 11.22 | 0.86 | 1.16 | 1    | 1.14 | 1.27 | 0.88 | 0.09 | 1.13 | 0.66 | 1.53 |
| 1.18  | 0.84 | 1.19 | 1    | 1.1  | 0.99 | 0.65 | 0.3  | 1.15 | 0.89 | 0.85 |
| 0.67  | 1.07 | 1.08 | 1.03 | 0.85 | 1.33 | 1.13 | 1.52 | 0.88 | 1.04 | 0.76 |
| 0.68  | 0.85 | 1    | 0.89 | 1.88 | 2.36 | 0.57 | 2.45 | 1.3  | 1.04 | 0.92 |
| 1.23  | 0.99 | 1.08 | 1.06 | 0.96 | 1.5  | 0.98 | 0.7  | 0.91 | 2.59 | 1.43 |
| 0.6   | 2.37 | 1.13 | 1.47 | 1.04 | 0.46 | 0.92 | 2.72 | 0.96 | 0.66 | 0.94 |
| 1.54  | 0.81 | 0.9  | 1.46 | 8.89 | 3.61 | 0.78 | 1.13 | 1.15 | 3.28 | 1.06 |
| 2.9   | 0.28 | 1.03 | 0.22 | 2.67 | 1.42 | 0.89 | 1.64 | 0.83 | 0.83 | 0.5  |
| 1.41  | 1.26 | 0.85 | 1    | 0.6  | 0.8  | 0.82 | 3.57 | 0.87 | 1.47 | 1.4  |
| 0.44  | 0.89 | 1.23 | 2.35 | 0.93 | 1.32 | 1.3  | 1.12 | 1.28 | 5.81 | 1    |
| 1.41  | 0.48 | 1.11 | 1.95 | 1.51 | 2.36 | 0.75 | 0.86 | 0.74 | 0.63 | 3.49 |

|      |      |      |      |      |       |      |       |      |      |       |
|------|------|------|------|------|-------|------|-------|------|------|-------|
| 0.65 | 0.99 | 0.83 | 0.85 | 1.21 | 0.67  | 1.15 | 0.86  | 1.27 | 5.12 | 0.82  |
| 1.27 | 1.36 | 0.9  | 0.92 | 0.88 | 1.35  | 0.17 | 0.55  | 1.29 | 1.24 | 1.12  |
| 3.26 | 0.89 | 2.37 | 5.96 | 1.11 | 11.62 | 3.67 | 0.13  | 2.26 | 0.22 | 0.69  |
| 0.62 | 0.77 | 0.83 | 0.59 | 0.67 | 1.8   | 0.67 | 18.06 | 0.65 | 4.27 | 0.9   |
| 1.25 | 0.87 | 1.02 | 0.89 | 0.62 | 0.6   | 0.83 | 1.29  | 1.61 | 0.9  | 0.86  |
| 2.41 | 0.89 | 1.07 | 0.99 | 1.36 | 1.47  | 1.13 | 0.57  | 0.96 | 2    | 1.07  |
| 1.13 | 0.91 | 1.01 | 1.1  | 1.63 | 0.95  | 1.14 | 1.07  | 1.12 | 1.12 | 0.95  |
| 3.29 | 0.98 | 1.05 | 1.15 | 0.97 | 1.73  | 0.86 | 0.54  | 1.18 | 1.03 | 1.06  |
| 1.26 | 0.81 | 0.94 | 0.89 | 1.36 | 1.32  | 1.26 | 2.7   | 1.09 | 2.87 | 0.78  |
| 0.83 | 1.16 | 1.22 | 1.18 | 0.95 | 1.1   | 0.97 | 12.15 | 1.08 | 0.87 | 0.93  |
| 0.6  | 1.13 | 1.26 | 1.12 | 1.05 | 0.74  | 1.37 | 0.69  | 1.6  | 5.87 | 0.97  |
| 2.33 | 3.75 | 1.18 | 3.52 | 0.06 | 0.61  | 10   | 0.1   | 1.3  | 0.34 | 29.33 |
| 1.72 | 0.99 | 1.16 | 1.23 | 1.02 | 0.97  | 1.39 | 0.92  | 1.16 | 1.38 | 1.12  |
| 2.28 | 0.06 | 0.94 | 0.46 | 0.58 | 0.59  | 1.2  | 5     | 1.05 | 1.45 | 1.43  |

| 211370_s_at | 212983_at | 204947_at | 213342_at | 201502_s_at | 205604_at | 218902_at | 201131_s_at | 205192_at | 221820_s_at | 206657_s_at |
|-------------|-----------|-----------|-----------|-------------|-----------|-----------|-------------|-----------|-------------|-------------|
| 0.67        | 1.29      | 1.26      | 1.02      | 1.09        | 1.44      | 1.27      | 0.94        | 0.95      | 0.92        | 1.77        |
| 0.94        | 0.97      | 1.39      | 2.17      | 2.23        | 0.87      | 1.02      | 0.87        | 0.75      | 1.03        | 0.95        |
| 9.06        | 1.51      | 1.07      | 2.24      | 0.67        | 1.05      | 1.77      | 4.13        | 0.77      | 0.85        | 0.85        |
| 2.8         | 1.07      | 0.97      | 1.37      | 1.11        | 1.69      | 1.36      | 1.06        | 2.03      | 1.2         | 2.44        |
| 1.13        | 0.88      | 2.02      | 1.07      | 2.56        | 0.94      | 1.27      | 0.32        | 0.88      | 1.07        | 1.47        |
| 23.33       | 0.83      | 1.16      | 3.76      | 0.98        | 9.23      | 0.91      | 2.39        | 0.77      | 1.53        | 1.03        |
| 0.73        | 2.06      | 0.42      | 1.04      | 1.29        | 0.85      | 0.34      | 0.25        | 1.39      | 1.39        | 0.38        |
| 1.16        | 1.04      | 0.81      | 3.5       | 1.6         | 1.93      | 1.05      | 2.16        | 1.03      | 0.98        | 1.68        |
| 0.96        | 1.1       | 1.27      | 1.01      | 1.32        | 0.95      | 0.77      | 0.7         | 0.85      | 0.85        | 1.06        |
| 0.44        | 1         | 0.78      | 1.04      | 2.58        | 0.39      | 1.23      | 0.5         | 1.57      | 0.87        | 1.7         |
| 1.04        | 0.91      | 1.44      | 0.63      | 1.16        | 0.87      | 1.3       | 1.85        | 1.44      | 1.08        | 0.18        |
| 1.14        | 1.44      | 2.23      | 1.22      | 0.58        | 0.8       | 0.9       | 1.88        | 1.3       | 0.86        | 1.65        |
| 1.1         | 1.18      | 2.01      | 0.91      | 0.85        | 0.98      | 0.96      | 1.8         | 1.27      | 1.18        | 0.92        |
| 7.52        | 0.74      | 10.61     | 0.47      | 0.43        | 8.81      | 0.65      | 0.05        | 2.46      | 1.69        | 10.09       |
| 1.65        | 0.96      | 1.23      | 1.04      | 1.02        | 1.14      | 0.72      | 0.82        | 1.41      | 1.22        | 1.28        |
| 0.9         | 0.99      | 1.08      | 1.26      | 1.15        | 1.2       | 0.87      | 1.46        | 1.26      | 0.89        | 1.15        |
| 1.59        | 1.13      | 2.14      | 0.94      | 0.7         | 2.94      | 1.15      | 1.69        | 1.37      | 0.76        | 0.59        |
| 1.06        | 1.07      | 1.25      | 1.36      | 2.03        | 1.51      | 1.52      | 0.95        | 0.85      | 1.02        | 1.27        |
| 1.25        | 1.88      | 0.69      | 2.72      | 1.4         | 0.36      | 6.36      | 7           | 0.31      | 0.72        | 1.25        |
| 1.77        | 1.24      | 3.81      | 0.93      | 0.54        | 8.12      | 0.57      | 0.71        | 0.2       | 1.6         | 16.6        |
| 0.43        | 2.52      | 1.02      | 0.88      | 1.22        | 1.15      | 1.06      | 5.79        | 1.11      | 0.67        | 3.51        |
| 1.64        | 0.92      | 3.15      | 0.53      | 3.45        | 2.56      | 1.18      | 1.07        | 2.13      | 0.51        | 6.88        |
| 1.17        | 0.95      | 0.58      | 0.87      | 1.18        | 0.67      | 0.75      | 20.64       | 0.9       | 1.07        | 0.75        |
| 1.11        | 0.71      | 1         | 0.78      | 0.35        | 0.68      | 0.28      | 0           | 1.55      | 0.82        | 0.72        |
| 0.48        | 0.84      | 0.77      | 1.35      | 2.23        | 0.03      | 0.52      | 0.06        | 5.08      | 0.45        | 1.09        |
| 1.41        | 0.84      | 1.29      | 1.07      | 0.78        | 1.02      | 1.86      | 1.05        | 1.79      | 1.03        | 1.21        |
| 1.01        | 0.98      | 0.98      | 0.87      | 0.42        | 0.3       | 0.88      | 4.08        | 1.07      | 1.18        | 0.49        |
| 1.29        | 0.61      | 0.65      | 0.67      | 4.18        | 3.43      | 0.59      | 0.38        | 1.17      | 1.48        | 5.38        |
| 1.92        | 1.34      | 0.53      | 0.51      | 0.54        | 2.04      | 1.47      | 63.41       | 1.57      | 1.37        | 1.03        |
| 0.68        | 1.28      | 1.27      | 1.32      | 1.47        | 1.3       | 1.27      | 1.24        | 1.12      | 0.87        | 1.52        |

|      |       |       |      |      |       |      |       |      |      |       |
|------|-------|-------|------|------|-------|------|-------|------|------|-------|
| 0.63 | 1.54  | 0.84  | 5.19 | 0.66 | 4.9   | 0.62 | 0.49  | 0.88 | 0.81 | 1.17  |
| 1.85 | 1.69  | 2.01  | 1.16 | 0.93 | 11.01 | 0.83 | 0.18  | 1.48 | 1.61 | 1.82  |
| 1.02 | 1.11  | 1.18  | 0.96 | 0.84 | 1.71  | 1.12 | 1.04  | 1.35 | 1.06 | 1.06  |
| 1.5  | 21.77 | 2.28  | 0.78 | 0.35 | 0.96  | 0.4  | 0.26  | 0.39 | 0.64 | 1.24  |
| 1.17 | 1.9   | 1.28  | 40.4 | 2.61 | 0.77  | 0.47 | 4     | 1.15 | 0.81 | 0.8   |
| 1.13 | 2.45  | 1.31  | 1.2  | 0.81 | 9.07  | 5.39 | 0.66  | 0.76 | 0.81 | 3.77  |
| 1.35 | 0.47  | 1.47  | 0.57 | 2.35 | 0.74  | 2.09 | 11.14 | 1.31 | 1.05 | 0.44  |
| 0.6  | 1.01  | 1.1   | 0.88 | 0.71 | 0.33  | 1    | 2.5   | 0.89 | 0.74 | 1.05  |
| 0.94 | 10.21 | 1.34  | 0.63 | 3.57 | 2.57  | 0.71 | 0.98  | 1.21 | 0.82 | 1.17  |
| 1.04 | 0.74  | 1.1   | 1.02 | 1.29 | 0.56  | 0.4  | 0.12  | 1.43 | 0.9  | 6.8   |
| 1.37 | 1.72  | 0.67  | 1.08 | 0.91 | 0.89  | 0.99 | 1.83  | 1.04 | 1.52 | 1.38  |
| 0.96 | 1.04  | 0.99  | 0.9  | 1.24 | 1.1   | 1.66 | 0.35  | 0.88 | 0.81 | 1.02  |
| 1.06 | 8.05  | 0.41  | 1.36 | 3.43 | 4.72  | 0.76 | 1.35  | 0.59 | 0.76 | 1.08  |
| 1.25 | 1.74  | 1.18  | 1.62 | 0.54 | 1.24  | 1.64 | 2.6   | 1.42 | 0.6  | 0.83  |
| 1.03 | 5.64  | 0.71  | 1.24 | 2.85 | 3.49  | 0.86 | 1.32  | 0.76 | 1    | 0.97  |
| 1.04 | 1.01  | 1.44  | 1.29 | 2.51 | 1.75  | 1.06 | 9.73  | 0.95 | 1.1  | 1.16  |
| 0.92 | 1.14  | 1.2   | 0.84 | 7.24 | 1.67  | 0.86 | 1.06  | 1.81 | 0.99 | 2.82  |
| 1.12 | 0.96  | 1.02  | 1.23 | 1.45 | 0.81  | 0.85 | 0.49  | 1.47 | 0.9  | 3.06  |
| 0.98 | 1.06  | 0.79  | 0.95 | 0.94 | 1.25  | 1.2  | 0.79  | 1.03 | 0.96 | 1.14  |
| 0.89 | 1.13  | 1.31  | 0.83 | 0.6  | 0.92  | 1.29 | 0.17  | 0.81 | 1.11 | 15.27 |
| 0.83 | 0.85  | 0.77  | 0.81 | 5.73 | 0.43  | 0.69 | 0.87  | 1.45 | 0.94 | 0.62  |
| 1.12 | 1.07  | 1.07  | 0.73 | 0.72 | 3.54  | 0.86 | 0.98  | 1.53 | 0.91 | 0.78  |
| 0.99 | 0.97  | 0.84  | 1.18 | 0.85 | 1.31  | 0.82 | 1.68  | 1.04 | 0.91 | 0.85  |
| 1.12 | 1.25  | 1.03  | 2.26 | 1.21 | 2.55  | 1.02 | 1.08  | 1.11 | 0.96 | 1.2   |
| 0.65 | 4.5   | 0.94  | 1.23 | 1.24 | 2.79  | 1.67 | 4.12  | 0.52 | 0.69 | 4.95  |
| 0.91 | 1.26  | 11.03 | 1.26 | 1.54 | 0.93  | 1.01 | 0.2   | 1.15 | 1.1  | 1.09  |
| 0.59 | 1.73  | 1.37  | 1.54 | 6.08 | 0.5   | 1.08 | 4.83  | 1.04 | 0.79 | 13.89 |
| 3.08 | 0.73  | 1.16  | 1.18 | 1.78 | 1.3   | 0.88 | 1.43  | 1.38 | 2.02 | 0.51  |
| 1.14 | 0.8   | 0.72  | 0.95 | 4.1  | 0.67  | 1.52 | 1.01  | 1.09 | 1.38 | 1.17  |
| 1.03 | 4.35  | 0.92  | 1.5  | 4.97 | 4.62  | 0.86 | 1.33  | 0.87 | 0.84 | 1.42  |
| 0.95 | 1.27  | 1.01  | 1.09 | 2.33 | 2.13  | 0.61 | 0.75  | 0.68 | 0.88 | 2.05  |
| 1.01 | 0.73  | 1.35  | 0.98 | 0.6  | 0.91  | 1.39 | 1.09  | 1.54 | 0.68 | 2.17  |
| 1.15 | 0.83  | 0.59  | 1.27 | 1.04 | 1.16  | 1.53 | 3.78  | 1.3  | 1    | 1.07  |

|      |      |      |       |      |      |      |        |      |      |       |
|------|------|------|-------|------|------|------|--------|------|------|-------|
| 0.95 | 1.25 | 1.17 | 0.98  | 0.81 | 1.06 | 0.72 | 0.14   | 0.58 | 0.87 | 0.77  |
| 1.03 | 1.51 | 1.71 | 0.78  | 1.08 | 1.63 | 1.81 | 2.08   | 1.02 | 0.97 | 17.34 |
| 1.18 | 0.98 | 1.22 | 0.98  | 1.68 | 2.5  | 0.74 | 251.75 | 1.07 | 1.04 | 0.68  |
| 0.95 | 0.99 | 1.09 | 1.13  | 1.41 | 1.13 | 1.47 | 2.83   | 1.48 | 1.1  | 1.09  |
| 0.87 | 0.89 | 1.15 | 0.9   | 0.94 | 0.87 | 0.99 | 1.56   | 0.98 | 0.83 | 1.42  |
| 0.97 | 1.38 | 1.38 | 0.74  | 1.07 | 2.39 | 1.69 | 0.82   | 0.39 | 0.9  | 1.04  |
| 1.53 | 1.06 | 0.67 | 1.73  | 0.34 | 2.88 | 1.12 | 0.67   | 1.36 | 1.46 | 0.46  |
| 2.43 | 1.63 | 1.28 | 0.87  | 1.55 | 2.23 | 0.94 | 0.66   | 1.14 | 1.15 | 1.46  |
| 0.67 | 1.36 | 0.79 | 0.88  | 1.33 | 2.58 | 0.75 | 1.63   | 0.46 | 1.13 | 0.73  |
| 1.85 | 0.78 | 1.69 | 1.26  | 1.05 | 3.82 | 1.27 | 1.52   | 0.89 | 0.66 | 2.47  |
| 3.01 | 0.37 | 3.76 | 2.14  | 0.71 | 0.81 | 1.56 | 10.38  | 1.06 | 1.69 | 6.16  |
| 0.77 | 1.03 | 0.96 | 1.26  | 1.14 | 1.47 | 1.36 | 1.06   | 1.9  | 0.89 | 5.38  |
| 1.12 | 0.98 | 0.84 | 1.11  | 1.14 | 1.08 | 1.34 | 1.41   | 1.3  | 0.73 | 1     |
| 0.69 | 1.11 | 0.65 | 1.18  | 2.69 | 1.39 | 1.24 | 0.74   | 0.68 | 1.03 | 1.46  |
| 0.81 | 1.88 | 1.45 | 2     | 0.93 | 0.12 | 0.91 | 2.67   | 1.44 | 0.82 | 0.5   |
| 0.21 | 2.17 | 0.94 | 52.59 | 2.52 | 0.22 | 0.3  | 2.37   | 0.71 | 0.14 | 0.06  |
| 0.92 | 0.6  | 0.5  | 1.07  | 2.22 | 1.14 | 1.04 | 0.9    | 0.99 | 1.15 | 2.34  |
| 0.64 | 0.84 | 1    | 2.06  | 0.98 | 0.41 | 0.89 | 0.1    | 0.42 | 1.15 | 0.27  |
| 1    | 0.85 | 0.89 | 1.52  | 0.74 | 1.05 | 0.79 | 1.63   | 1.29 | 1.29 | 1.87  |
| 1.69 | 1.88 | 1.42 | 5.36  | 1.34 | 1.58 | 2.04 | 1.19   | 2.58 | 2.56 | 2.43  |
| 1.22 | 1.08 | 0.4  | 0.88  | 1.62 | 1.94 | 1.71 | 279    | 0.79 | 0.64 | 1.24  |
| 1.71 | 1.24 | 2.42 | 0.78  | 1.35 | 0.8  | 0.94 | 4.57   | 1.77 | 1.09 | 1.05  |
| 0.85 | 1.6  | 1.01 | 0.86  | 1.12 | 0.81 | 0.39 | 0.53   | 1.21 | 1.44 | 0.88  |
| 1.09 | 1.52 | 1.56 | 1.26  | 0.94 | 0.88 | 0.73 | 0.85   | 0.75 | 1.09 | 1.38  |
| 1.34 | 1.14 | 1.24 | 1.55  | 0.79 | 1.01 | 1.17 | 1.12   | 0.95 | 0.92 | 2.16  |
| 0.79 | 0.9  | 1.23 | 1.15  | 1.55 | 1.96 | 0.67 | 1.36   | 1.4  | 0.99 | 2.94  |
| 0.99 | 1.17 | 1.3  | 0.84  | 1.22 | 1.53 | 1.1  | 1.04   | 1.23 | 1.13 | 2.29  |
| 1.03 | 1.34 | 0.77 | 2.29  | 0.93 | 1.08 | 1.51 | 0.51   | 0.95 | 1.06 | 0.59  |
| 0.58 | 0.89 | 1.18 | 1.2   | 0.99 | 1.7  | 0.98 | 1.49   | 0.76 | 0.93 | 0.85  |
| 1    | 1.07 | 1.11 | 1.02  | 1.32 | 1.18 | 1.05 | 0.94   | 1.47 | 0.88 | 0.72  |
| 1.25 | 1.25 | 1.41 | 0.9   | 1.48 | 1.32 | 1.28 | 0.78   | 1.09 | 1.46 | 2.78  |
| 1.09 | 1.85 | 0.91 | 0.82  | 0.41 | 0.73 | 0.79 | 2.92   | 1.01 | 0.76 | 1.4   |
| 1.19 | 0.91 | 0.65 | 1.65  | 2.25 | 1.19 | 1.37 | 2      | 1.01 | 0.92 | 0.44  |

|      |      |      |      |      |      |      |       |      |      |       |
|------|------|------|------|------|------|------|-------|------|------|-------|
| 0.6  | 0.69 | 1.19 | 0.8  | 0.75 | 1.06 | 1    | 1.34  | 0.7  | 1.07 | 1.91  |
| 0.82 | 1.23 | 1.53 | 0.63 | 1    | 1.15 | 1.17 | 1.67  | 0.99 | 0.91 | 1.12  |
| 0.86 | 1.26 | 1.74 | 0.99 | 1.15 | 8.78 | 1.18 | 0.98  | 0.77 | 0.88 | 6.19  |
| 0.46 | 1.5  | 1.35 | 1.11 | 1.18 | 3.77 | 1.3  | 1.31  | 0.73 | 0.99 | 1.02  |
| 1.43 | 0.9  | 1.17 | 0.73 | 0.85 | 2.58 | 0.86 | 1.47  | 1.84 | 1.27 | 0.66  |
| 0.53 | 1.74 | 0.73 | 0.6  | 3.58 | 1.78 | 0.65 | 0.85  | 1.65 | 0.39 | 2.48  |
| 1.15 | 1.2  | 0.76 | 1.16 | 1.89 | 0.94 | 0.81 | 1.73  | 2.22 | 0.87 | 1.48  |
| 0.95 | 1.04 | 1.22 | 1.26 | 1.02 | 1.58 | 0.87 | 4.3   | 0.69 | 1.07 | 1.06  |
| 0.8  | 0.73 | 0.72 | 1.23 | 0.64 | 1.94 | 0.86 | 0.73  | 1.72 | 0.95 | 1.4   |
| 1.37 | 0.79 | 0.99 | 1.19 | 1.71 | 1.06 | 0.97 | 0.67  | 1.38 | 1.29 | 0.89  |
| 1.08 | 1.17 | 0.99 | 1.2  | 0.88 | 0.93 | 1.06 | 3.03  | 1.43 | 1.33 | 2.57  |
| 1.43 | 1.04 | 1.28 | 0.91 | 0.89 | 0.85 | 1.31 | 0.98  | 1.4  | 1.07 | 1.4   |
| 0.73 | 1.18 | 1.13 | 0.91 | 1.41 | 1.42 | 1.78 | 1.5   | 0.55 | 0.82 | 1.85  |
| 1.26 | 14.7 | 2.51 | 0.98 | 0.68 | 1.07 | 0.57 | 0.52  | 0.7  | 0.81 | 1.13  |
| 1.25 | 0.9  | 0.77 | 1.11 | 1.04 | 1.22 | 0.99 | 1.09  | 1.3  | 1.11 | 1.02  |
| 0.99 | 1.06 | 1.15 | 3.63 | 1.31 | 1.19 | 1.79 | 13.72 | 3.06 | 1.12 | 1.04  |
| 0.69 | 0.94 | 0.95 | 0.56 | 0.83 | 1.27 | 1.24 | 0.7   | 1.59 | 1.11 | 0.77  |
| 1.08 | 1.12 | 1.03 | 1.29 | 2.39 | 1.03 | 1.76 | 3.63  | 1.18 | 1.08 | 0.81  |
| 0.97 | 0.85 | 0.89 | 1.48 | 4.17 | 2.73 | 1.13 | 1.39  | 1.31 | 0.78 | 0.46  |
| 0.8  | 1.4  | 1.24 | 0.96 | 0.66 | 1.3  | 1.47 | 0.07  | 0.87 | 1.12 | 1.09  |
| 0.67 | 0.9  | 1.09 | 1.34 | 0.73 | 0.8  | 1.03 | 1.2   | 0.7  | 1.06 | 3.33  |
| 0.99 | 0.96 | 0.84 | 1.03 | 1    | 1.37 | 1.18 | 0.25  | 1.32 | 1.01 | 0.66  |
| 1.21 | 0.95 | 0.76 | 0.76 | 1.05 | 1.41 | 1.13 | 1.04  | 0.97 | 0.88 | 0.67  |
| 1.98 | 0.82 | 0.41 | 0.67 | 0.52 | 3.45 | 2.95 | 0.85  | 1.73 | 1.28 | 1.28  |
| 0.84 | 0.99 | 0.9  | 1.2  | 0.48 | 0.85 | 1.7  | 7.96  | 0.93 | 1.25 | 1.63  |
| 0.96 | 0.8  | 0.88 | 1.39 | 0.88 | 1.52 | 0.54 | 0.92  | 0.85 | 1.13 | 1.36  |
| 1.05 | 1.13 | 0.25 | 0.99 | 1.14 | 1.15 | 1.01 | 0.97  | 0.96 | 0.89 | 0.11  |
| 1.52 | 0.57 | 1.09 | 0.87 | 1.19 | 0.88 | 1.5  | 2.79  | 0.76 | 1.56 | 1.1   |
| 0.62 | 0.93 | 1.68 | 1.12 | 0.58 | 0.98 | 0.51 | 1.24  | 1.2  | 0.78 | 0.94  |
| 0.9  | 0.94 | 0.91 | 0.86 | 0.98 | 2.08 | 1.12 | 1     | 0.82 | 1.1  | 1.89  |
| 0.71 | 1.11 | 0.92 | 0.2  | 1.24 | 1.75 | 1.12 | 1.61  | 1.08 | 1.03 | 0.82  |
| 1.03 | 1.51 | 1.71 | 0.78 | 1.08 | 1.63 | 1.81 | 2.08  | 1.02 | 0.97 | 17.34 |
| 0.96 | 0.9  | 1.09 | 1.15 | 3.55 | 1.92 | 0.89 | 0.93  | 0.8  | 1.07 | 0.82  |

|      |      |       |      |      |      |      |      |      |      |      |
|------|------|-------|------|------|------|------|------|------|------|------|
| 0.99 | 1    | 0.81  | 1.32 | 0.72 | 1.78 | 0.98 | 3.07 | 1.27 | 0.94 | 0.8  |
| 1.05 | 0.92 | 0.7   | 1.01 | 1.75 | 2.28 | 0.95 | 0.96 | 1.81 | 1    | 2.03 |
| 0.95 | 1.13 | 1.22  | 1.25 | 0.78 | 2.85 | 1.23 | 0.52 | 2.55 | 1.39 | 1.11 |
| 1.04 | 1.01 | 0.76  | 8.57 | 3    | 1.1  | 1.23 | 1.77 | 1.08 | 1.05 | 0.73 |
| 0.91 | 1.04 | 0.78  | 0.94 | 0.53 | 1.42 | 0.67 | 6.35 | 1.74 | 1.02 | 1.35 |
| 0.78 | 0.92 | 1.27  | 1.05 | 0.93 | 0.28 | 1.04 | 1.31 | 0.93 | 1.08 | 0.21 |
| 0.84 | 0.9  | 0.82  | 0.94 | 0.96 | 1.32 | 1.2  | 0.92 | 1.09 | 0.96 | 0.6  |
| 1.41 | 0.75 | 0.44  | 1.18 | 0.67 | 0.92 | 1.28 | 3.52 | 1.4  | 1.13 | 1.58 |
| 1.18 | 1.01 | 1.76  | 0.62 | 1.02 | 1.61 | 1.47 | 2.27 | 0.96 | 0.58 | 1.23 |
| 1.06 | 1.28 | 1.2   | 1.05 | 1.89 | 4.52 | 1.38 | 1.5  | 1.12 | 0.97 | 0.65 |
| 0.68 | 1.1  | 0.83  | 0.59 | 1.21 | 0.5  | 1.05 | 0.51 | 0.66 | 0.89 | 1    |
| 3.09 | 1.26 | 1.12  | 1.09 | 1.52 | 0.61 | 0.8  | 1.28 | 0.73 | 1.13 | 2.57 |
| 1.38 | 1.05 | 1.02  | 1.15 | 1.46 | 0.99 | 1.72 | 2.18 | 1.02 | 1.37 | 1.06 |
| 0.84 | 0.89 | 0.6   | 1.08 | 1.73 | 0.44 | 1.53 | 2.19 | 1.18 | 0.97 | 0.76 |
| 1.38 | 0.84 | 0.31  | 2.65 | 1.3  | 1.83 | 0.45 | 1.87 | 0.44 | 0.6  | 0.94 |
| 1.11 | 1.05 | 1.2   | 0.28 | 0.68 | 1.11 | 1.07 | 0.8  | 1.01 | 0.97 | 1.62 |
| 0.99 | 1.1  | 1.22  | 0.84 | 0.87 | 1.52 | 0.89 | 1.06 | 1.81 | 1.14 | 1.19 |
| 1.08 | 1.19 | 10.89 | 2.47 | 1.29 | 2.34 | 1.03 | 7.66 | 0.97 | 0.92 | 1.08 |
| 0.93 | 0.83 | 0.91  | 0.87 | 1.01 | 0.88 | 0.8  | 2.43 | 1.15 | 1.03 | 1.44 |
| 0.81 | 1.07 | 1.07  | 1.02 | 0.57 | 1.45 | 0.85 | 1.15 | 0.96 | 1.43 | 0.91 |
| 1.04 | 1.12 | 1.82  | 1.15 | 1.31 | 0.9  | 1.46 | 0.95 | 1.34 | 0.85 | 1.97 |
| 1.8  | 0.66 | 1.08  | 1.23 | 1.19 | 2.31 | 0.46 | 0.96 | 0.95 | 1.05 | 2.03 |
| 1.34 | 1.35 | 1.18  | 3.56 | 0.86 | 1.1  | 1.02 | 0.86 | 1.02 | 0.92 | 1.49 |
| 0.84 | 0.92 | 2.58  | 1.37 | 0.69 | 3.05 | 1.37 | 0.34 | 1.05 | 1.04 | 1.1  |
| 1.01 | 2.54 | 0.76  | 1.32 | 1.04 | 0.34 | 1.32 | 1.81 | 0.91 | 0.77 | 2.37 |
| 1.1  | 1.42 | 0.9   | 0.82 | 1.19 | 1.07 | 1.06 | 1.1  | 1.78 | 1.1  | 1.11 |
| 1.37 | 1.28 | 1.25  | 0.83 | 3.06 | 1.21 | 0.88 | 1.98 | 0.72 | 0.7  | 1    |
| 0.75 | 1.06 | 0.97  | 1.13 | 0.94 | 1.48 | 1.25 | 0.99 | 0.95 | 0.91 | 0.73 |
| 1.07 | 1.03 | 0.66  | 1.2  | 0.81 | 1.17 | 1.05 | 1.67 | 1.24 | 0.93 | 0.95 |
| 1.21 | 0.98 | 1.4   | 0.83 | 2    | 0.53 | 0.97 | 0.52 | 1.08 | 0.78 | 1    |
| 0.93 | 1.14 | 1.53  | 2.19 | 0.78 | 2.31 | 0.85 | 1.09 | 0.96 | 0.93 | 2.15 |
| 0.92 | 1.01 | 1.04  | 1.03 | 1.66 | 1.44 | 0.8  | 1    | 1.44 | 0.93 | 1    |
| 0.99 | 1.12 | 0.95  | 3.17 | 1.06 | 3.15 | 0.8  | 0.84 | 1.07 | 1.06 | 1.05 |

|      |      |      |      |      |      |      |        |      |      |      |
|------|------|------|------|------|------|------|--------|------|------|------|
| 0.65 | 1.86 | 1.62 | 1.31 | 1.15 | 2.07 | 0.69 | 1.65   | 0.92 | 1.02 | 1.13 |
| 1.04 | 1.31 | 1.09 | 1.12 | 0.74 | 1.3  | 0.85 | 1.73   | 0.9  | 0.93 | 1.16 |
| 1.07 | 1    | 0.93 | 1.04 | 1.04 | 1.08 | 0.93 | 0.84   | 1.08 | 1.01 | 0.94 |
| 1.02 | 0.53 | 1.03 | 0.5  | 1.07 | 2    | 1.34 | 0.55   | 0.91 | 1.03 | 0.73 |
| 0.73 | 1.13 | 0.71 | 0.75 | 1.3  | 3.52 | 0.68 | 1.04   | 0.85 | 0.42 | 1.28 |
| 0.93 | 1.08 | 0.99 | 0.95 | 1.19 | 0.84 | 1.2  | 1.46   | 0.97 | 0.96 | 1.05 |
| 0.66 | 1.55 | 0.76 | 4.07 | 0.66 | 5.61 | 0.66 | 0.57   | 0.76 | 0.8  | 1.34 |
| 0.92 | 0.81 | 1.05 | 0.77 | 0.87 | 0.85 | 1.4  | 2.47   | 1.34 | 1.2  | 1.44 |
| 0.9  | 0.91 | 1.28 | 1.62 | 1.45 | 0.89 | 1.18 | 0.53   | 1.28 | 1.12 | 0.82 |
| 0.58 | 1.38 | 1.03 | 2.85 | 0.62 | 2.79 | 0.6  | 2.12   | 0.68 | 0.75 | 1.14 |
| 1.04 | 1.09 | 0.52 | 0.93 | 1.18 | 0.38 | 1.18 | 0.81   | 0.84 | 0.9  | 0.86 |
| 1.05 | 1.8  | 1.37 | 1.27 | 0.9  | 0.67 | 0.52 | 2.12   | 0.9  | 1.09 | 0.7  |
| 0.72 | 0.9  | 0.66 | 0.85 | 0.87 | 1.55 | 0.84 | 1.02   | 1.05 | 0.93 | 1.32 |
| 1.15 | 0.86 | 0.76 | 4.53 | 0.92 | 1.24 | 0.93 | 5.69   | 1.08 | 0.82 | 1.1  |
| 1.11 | 0.82 | 0.94 | 3.14 | 3.13 | 1.29 | 1.12 | 2.01   | 0.94 | 1    | 1    |
| 1.37 | 0.99 | 0.51 | 1.18 | 1.35 | 1.83 | 0.71 | 0.93   | 0.81 | 1.29 | 1    |
| 1.06 | 0.96 | 1.03 | 5    | 0.96 | 1.15 | 1.14 | 1.75   | 1.17 | 0.97 | 1.49 |
| 0.9  | 0.91 | 0.82 | 1.01 | 1.89 | 2.74 | 1.17 | 1.13   | 0.81 | 0.78 | 1.74 |
| 0.61 | 0.57 | 1.29 | 1.38 | 0.83 | 0.65 | 0.93 | 0.92   | 0.84 | 1.35 | 0.87 |
| 0.83 | 0.78 | 1.08 | 1.48 | 0.77 | 3.71 | 0.8  | 1.08   | 0.55 | 0.69 | 2.25 |
| 1.25 | 1.02 | 1.11 | 0.9  | 1.13 | 1.58 | 2.1  | 0.9    | 1.11 | 0.94 | 1.25 |
| 4.17 | 2.17 | 0.52 | 0.94 | 3    | 0.89 | 1.09 | 709.31 | 1.71 | 1.96 | 0.81 |
| 1.13 | 1.08 | 1.22 | 1.3  | 0.91 | 0.8  | 0.89 | 6.58   | 1.43 | 0.99 | 0.83 |
| 0.52 | 1.18 | 1.13 | 1.58 | 1    | 1.96 | 0.98 | 1.43   | 0.62 | 1.22 | 1.22 |
| 1.18 | 0.98 | 0.72 | 1.04 | 0.98 | 0.48 | 0.87 | 2.31   | 0.81 | 0.93 | 4.16 |
| 0.99 | 0.54 | 0.72 | 0.84 | 0.21 | 0.22 | 1.75 | 0.22   | 0.94 | 0.7  | 0.87 |
| 1.06 | 1    | 1.12 | 1.39 | 1.11 | 1.01 | 1    | 1.04   | 0.97 | 0.98 | 0.6  |
| 0.93 | 1.16 | 1.85 | 2.72 | 1.06 | 0.78 | 1.14 | 0.68   | 1.1  | 1.04 | 1.4  |
| 1.03 | 1.04 | 0.9  | 3.84 | 0.97 | 1.51 | 0.97 | 0.83   | 1.09 | 1.13 | 1.27 |
| 0.67 | 1.18 | 1.07 | 0.97 | 0.92 | 0.95 | 1.02 | 1.17   | 1.06 | 1.01 | 0.83 |
| 1.18 | 1.51 | 1.54 | 1.14 | 0.86 | 2.22 | 0.89 | 1.16   | 1.6  | 1.43 | 1.11 |
| 0.83 | 1.02 | 0.53 | 0.9  | 1.07 | 0.86 | 0.88 | 1.08   | 0.99 | 0.83 | 0.38 |
| 1.44 | 0.95 | 0.96 | 0.66 | 1.1  | 0.97 | 1.23 | 5.57   | 1.6  | 1.23 | 0.96 |



|      |      |      |      |      |      |      |      |      |      |      |
|------|------|------|------|------|------|------|------|------|------|------|
| 2.36 | 2.12 | 0.6  | 0.95 | 1.53 | 0.85 | 1.13 | 0.11 | 1.27 | 0.85 | 1.88 |
| 0.97 | 0.85 | 2.03 | 1.44 | 0.52 | 2.29 | 1.4  | 1.4  | 0.87 | 0.75 | 2.33 |
| 1.07 | 0.95 | 1.76 | 0.79 | 0.98 | 1.39 | 0.85 | 1.05 | 0.9  | 1    | 1.54 |
| 0.65 | 0.84 | 1.1  | 0.74 | 0.54 | 0.41 | 0.63 | 1.33 | 0.75 | 1.09 | 0.87 |
| 1.04 | 1.13 | 6.79 | 2.21 | 0.73 | 4.51 | 1.04 | 1.83 | 1.14 | 1.27 | 1.1  |
| 0.92 | 0.85 | 0.91 | 1.08 | 1.08 | 1.5  | 1.04 | 2.28 | 0.74 | 1.12 | 2.19 |
| 1.09 | 0.93 | 0.64 | 0.78 | 0.48 | 0.93 | 0.56 | 1.1  | 1.22 | 1.48 | 0.56 |
| 1.19 | 1.06 | 0.76 | 0.29 | 0.85 | 0.17 | 0.63 | 0.49 | 1.04 | 0.88 | 0.32 |
| 0.45 | 1.32 | 1.58 | 0.79 | 1.46 | 1.22 | 0.82 | 1.64 | 0.77 | 1.42 | 1.16 |
| 0.98 | 0.73 | 0.81 | 1.4  | 1.23 | 1.13 | 1.16 | 0.56 | 0.88 | 0.8  | 1.37 |
| 0.81 | 0.81 | 0.77 | 1.33 | 1.13 | 1.44 | 0.32 | 1.13 | 0.58 | 1    | 0.59 |
| 1.08 | 0.97 | 1.12 | 0.62 | 0.77 | 0.89 | 0.91 | 0.39 | 1.12 | 1.06 | 0.8  |
| 0.81 | 0.86 | 1.1  | 0.8  | 3.55 | 0.36 | 0.83 | 1.07 | 1.46 | 0.71 | 1    |
| 0.97 | 0.92 | 0.94 | 0.17 | 1.11 | 0.85 | 1.11 | 5.92 | 0.93 | 1.05 | 3.28 |
| 1.27 | 0.75 | 0.58 | 0.92 | 1.2  | 0.65 | 1    | 1.22 | 0.72 | 0.85 | 0.94 |
| 0.95 | 0.88 | 1.39 | 1.01 | 0.56 | 1.59 | 0.9  | 1.69 | 0.75 | 0.9  | 2.08 |
| 0.81 | 0.87 | 0.97 | 0.82 | 0.82 | 0.7  | 1.47 | 0.3  | 1.24 | 0.93 | 1    |
| 0.93 | 1.09 | 0.72 | 9.36 | 0.78 | 1.04 | 0.7  | 0.55 | 0.84 | 0.94 | 0.52 |
| 0.52 | 0.92 | 0.66 | 1.3  | 1.21 | 2.11 | 1.06 | 0.3  | 1.83 | 1.23 | 1.88 |
| 0.82 | 0.41 | 0.43 | 0.5  | 1.07 | 0.91 | 0.4  | 0.03 | 4.06 | 1.08 | 1.35 |
| 2.32 | 0.96 | 1    | 0.9  | 0.83 | 0.77 | 1.07 | 1.16 | 1.37 | 1.2  | 0.73 |
| 0.59 | 1.45 | 0.98 | 4.58 | 0.64 | 3.48 | 0.6  | 1.27 | 0.84 | 0.78 | 1.07 |
| 0.56 | 1.31 | 2.47 | 0.99 | 0.37 | 2.4  | 0.56 | 0.81 | 1.03 | 0.98 | 0.89 |
| 0.75 | 1.27 | 1.49 | 1.11 | 0.35 | 1.6  | 0.53 | 0    | 0.35 | 0.65 | 1.24 |
| 0.97 | 1.11 | 0.61 | 0.99 | 1.23 | 1.4  | 1.1  | 1.04 | 1.38 | 0.75 | 1.36 |
| 1.19 | 1.26 | 1.27 | 1.39 | 1.15 | 3.79 | 1.04 | 0.99 | 1.61 | 1.16 | 1.53 |
| 0.8  | 0.63 | 2.51 | 0.63 | 0.36 | 0.71 | 1.18 | 0.86 | 0.54 | 0.83 | 0.77 |
| 1.27 | 0.99 | 3.31 | 1.14 | 1.34 | 0.7  | 0.49 | 0.2  | 1.37 | 1.38 | 0.4  |
| 0.52 | 1.47 | 1.65 | 1.73 | 2.01 | 0.82 | 0.7  | 0.85 | 1.65 | 0.97 | 0.96 |
| 0.11 | 1.83 | 1.67 | 3.36 | 0.26 | 3.51 | 3    | 1.13 | 1.24 | 0.35 | 1.75 |
| 1.24 | 1.19 | 0.81 | 2.14 | 0.87 | 3.33 | 0.71 | 2    | 0.89 | 0.9  | 0.5  |
| 0.75 | 1.48 | 1.25 | 2.41 | 1.68 | 1.2  | 1.1  | 0.93 | 3.64 | 0.64 | 0.72 |
| 1.32 | 1.41 | 1.22 | 1.58 | 1.19 | 1.17 | 1.81 | 2.11 | 3.66 | 0.73 | 5.38 |

|      |      |       |      |      |      |      |       |      |      |      |
|------|------|-------|------|------|------|------|-------|------|------|------|
| 1.18 | 1.16 | 1.21  | 0.88 | 0.88 | 1    | 1    | 4.12  | 0.92 | 1.05 | 0.96 |
| 1.15 | 1.17 | 1.08  | 0.55 | 1.21 | 0.96 | 0.79 | 0.75  | 0.94 | 0.91 | 1.38 |
| 0.74 | 0.52 | 18.77 | 8.79 | 0.73 | 1.53 | 0.96 | 2.87  | 0.43 | 1.06 | 0.65 |
| 0.94 | 0.85 | 5.07  | 0.7  | 0.92 | 2.93 | 0.96 | 0.23  | 0.71 | 1.18 | 6.22 |
| 0.84 | 0.78 | 0.76  | 1.01 | 0.84 | 1.24 | 0.97 | 56.41 | 1.34 | 1.08 | 1.43 |
| 0.99 | 1.27 | 1.28  | 0.73 | 1.05 | 1.04 | 1.07 | 2.31  | 0.81 | 1.18 | 1.49 |
| 0.87 | 1.1  | 1.47  | 0.91 | 1.14 | 1.3  | 1.11 | 0.89  | 1.13 | 1.11 | 1.14 |
| 1.04 | 1.06 | 1.47  | 1.04 | 0.8  | 1.73 | 1.32 | 2.26  | 1.16 | 1.28 | 2.08 |
| 1.12 | 1.42 | 0.61  | 1.06 | 1.33 | 1.38 | 1.38 | 1.11  | 1.83 | 1.09 | 1.34 |
| 0.89 | 1.07 | 0.75  | 1.45 | 1.19 | 0.74 | 0.9  | 1.06  | 1    | 0.81 | 0.76 |
| 1.03 | 1.04 | 1.02  | 0.98 | 1.14 | 0.62 | 1.05 | 2.73  | 0.62 | 1    | 0.9  |
| 0.3  | 0.44 | 0.97  | 0.28 | 2.33 | 1.88 | 3.33 | 0.29  | 5.63 | 7.4  | 4.13 |
| 1.42 | 1.46 | 1.21  | 1.07 | 0.29 | 1.06 | 0.87 | 0.87  | 1.55 | 0.89 | 0.84 |
| 1.67 | 1.14 | 1.31  | 1.02 | 0.76 | 0.23 | 0.76 | 26.12 | 2.34 | 1.25 | 1.38 |

| 209341_s_at | 205225_at | 221334_s_at | 203628_at | 204849_at | 201124_at | 201576_s_at | 201289_at | 213844_at | 213139_at | 209239_at |
|-------------|-----------|-------------|-----------|-----------|-----------|-------------|-----------|-----------|-----------|-----------|
| 1.02        | 5.35      | 3.92        | 0.95      | 0.87      | 0.88      | 0.93        | 0.74      | 0.4       | 0.6       | 0.94      |
| 1.16        | 0.79      | 0.99        | 0.77      | 1.15      | 0.89      | 0.93        | 0.74      | 0.97      | 0.48      | 1.35      |
| 1.85        | 0.96      | 1.64        | 1.18      | 0.85      | 0.91      | 1.2         | 1.31      | 1.99      | 2.23      | 1.09      |
| 1.14        | 0.83      | 1.96        | 0.94      | 1.05      | 2.09      | 1.11        | 1.49      | 1.46      | 4.27      | 0.93      |
| 1.51        | 1.12      | 2.61        | 0.76      | 0.86      | 1.51      | 0.91        | 0.8       | 0.73      | 0.63      | 1.05      |
| 0.71        | 10.33     | 2.61        | 6.09      | 1.12      | 1.9       | 1.73        | 2.75      | 1.79      | 2.82      | 1.2       |
| 1.34        | 0.22      | 11.5        | 0.99      | 1.11      | 1.72      | 0.79        | 0.79      | 0.67      | 1.12      | 0.76      |
| 0.95        | 2.62      | 0.87        | 0.78      | 0.85      | 0.59      | 1.53        | 4.42      | 1.47      | 0.67      | 1.15      |
| 1           | 0.48      | 1.37        | 0.91      | 0.4       | 1.22      | 1.29        | 0.82      | 1.39      | 0.45      | 1.24      |
| 0.75        | 1.31      | 0.16        | 0.62      | 0.34      | 0.24      | 0.81        | 3.22      | 0.66      | 3.08      | 1.01      |
| 1.27        | 1.64      | 0.72        | 1.19      | 1         | 1.28      | 0.99        | 1.8       | 2.8       | 1.35      | 0.99      |
| 1.1         | 2.84      | 1.37        | 0.82      | 1         | 0.74      | 0.87        | 0.95      | 0.91      | 0.54      | 0.81      |
| 1.16        | 1.29      | 1.62        | 0.87      | 0.83      | 1.21      | 0.82        | 0.95      | 1.34      | 0.59      | 0.91      |
| 0.26        | 7.93      | 17.6        | 17.58     | 0.04      | 0.82      | 0.21        | 5.92      | 27.85     | 3.74      | 1.48      |
| 1.47        | 3.07      | 0.7         | 1.4       | 1.21      | 1.16      | 1.96        | 1.42      | 1.59      | 1.71      | 1.5       |
| 1.21        | 6.17      | 2.12        | 0.59      | 0.75      | 1.3       | 0.93        | 0.46      | 0.96      | 5.13      | 0.91      |
| 1.25        | 2.15      | 6.37        | 0.91      | 1.05      | 0.99      | 0.81        | 0.89      | 1.17      | 0.79      | 1.12      |
| 1.05        | 1.24      | 3.33        | 5.25      | 0.85      | 1.8       | 0.96        | 0.49      | 1.15      | 1.47      | 0.97      |
| 1.32        | 10.5      | 1.38        | 2.3       | 1.27      | 1.16      | 1.09        | 0.29      | 1.1       | 0.79      | 1.11      |
| 1.39        | 2.7       | 6.63        | 0.52      | 0.78      | 0.93      | 1.01        | 4.78      | 1.91      | 0.41      | 1.96      |
| 0.49        | 0.78      | 2.26        | 4.07      | 0.44      | 2.64      | 0.81        | 7.77      | 1.33      | 3.75      | 0.6       |
| 0.93        | 12.38     | 9           | 2.67      | 0.83      | 2.52      | 0.89        | 0.52      | 0.54      | 1.43      | 1.33      |
| 1.07        | 1.94      | 0.55        | 0.95      | 0.99      | 1         | 1.06        | 0.9       | 0.77      | 1.05      | 0.89      |
| 1.21        | 0.22      | 3.13        | 0.56      | 1.41      | 1.57      | 1.06        | 2.69      | 1.24      | 0.3       | 0.47      |
| 1.79        | 0.48      | 0.85        | 0.12      | 1.05      | 1.4       | 0.73        | 15.27     | 0.11      | 24.58     | 1.92      |
| 0.85        | 1.56      | 1.34        | 1.09      | 1.39      | 0.77      | 1.03        | 1.19      | 2.14      | 0.53      | 1.07      |
| 1.14        | 0.87      | 0.5         | 1.2       | 0.95      | 0.91      | 0.54        | 2.52      | 0.82      | 0.82      | 0.85      |
| 0.97        | 8.45      | 3.45        | 3.96      | 0.78      | 3.48      | 1.4         | 0.59      | 3.68      | 2.22      | 1.91      |
| 0.5         | 3.59      | 1.47        | 0.26      | 1.32      | 1.29      | 0.51        | 0.03      | 0.5       | 3.69      | 1.02      |
| 0.83        | 3.33      | 0.59        | 1.13      | 0.89      | 0.92      | 0.99        | 1.88      | 0.94      | 1.6       | 0.9       |

|      |      |      |      |      |       |      |      |       |       |      |
|------|------|------|------|------|-------|------|------|-------|-------|------|
| 0.69 | 0.62 | 0.92 | 0.61 | 0.74 | 0.77  | 0.7  | 1.61 | 0.34  | 1.79  | 0.85 |
| 3.19 | 2.42 | 1.84 | 8.87 | 4.2  | 1.05  | 3.97 | 6.69 | 23.15 | 9.91  | 1.03 |
| 1.26 | 1.55 | 1.29 | 1.1  | 1.12 | 1.01  | 0.99 | 1.17 | 1.55  | 2.37  | 1.1  |
| 0.76 | 0.76 | 1.44 | 0.54 | 1.43 | 1.58  | 0.95 | 0.48 | 0.51  | 0.39  | 0.9  |
| 2.42 | 7.31 | 0.24 | 2.3  | 0.35 | 1.92  | 1.15 | 6.03 | 2.03  | 0.35  | 0.74 |
| 0.78 | 1.59 | 2.44 | 0.24 | 0.79 | 1.15  | 0.58 | 7.47 | 1.24  | 0.83  | 1.26 |
| 0.93 | 0.82 | 2.04 | 0.66 | 0.91 | 0.68  | 0.54 | 0.03 | 3.87  | 1.32  | 1.72 |
| 0.78 | 1.17 | 2.16 | 0.4  | 0.8  | 1.41  | 0.98 | 1.06 | 0.94  | 0.9   | 0.85 |
| 0.89 | 0.68 | 1.42 | 1.09 | 1.31 | 1.93  | 1.15 | 0.9  | 0.67  | 0.83  | 0.69 |
| 1.88 | 0.13 | 1.57 | 0.62 | 1.79 | 1.87  | 0.66 | 1.44 | 0.5   | 31.56 | 0.92 |
| 1.12 | 1.25 | 0.8  | 1.2  | 0.81 | 0.65  | 0.94 | 0.87 | 0.85  | 0.63  | 0.77 |
| 0.95 | 1.56 | 2.8  | 0.97 | 0.9  | 15.67 | 1.12 | 1.03 | 0.31  | 1.14  | 0.92 |
| 1.41 | 0.77 | 1.51 | 0.84 | 0.73 | 0.9   | 1.2  | 1.79 | 0.76  | 0.61  | 1.23 |
| 1.49 | 0.98 | 3.83 | 0.66 | 0.2  | 1.97  | 0.85 | 0.69 | 0.59  | 1.13  | 1.77 |
| 1.22 | 1    | 1.39 | 0.77 | 0.72 | 0.98  | 1.12 | 1.67 | 0.78  | 0.69  | 1.22 |
| 1.59 | 2.13 | 2.47 | 1.07 | 1.37 | 1.14  | 1.12 | 3.18 | 1.05  | 4.09  | 1.09 |
| 1.14 | 1.13 | 0.5  | 1.1  | 1.16 | 1.25  | 1.06 | 1.22 | 1.14  | 1.06  | 0.71 |
| 1.1  | 0.37 | 2.15 | 0.48 | 0.63 | 0.85  | 0.94 | 2.75 | 0.79  | 2.72  | 1.1  |
| 1.06 | 4.38 | 3.46 | 1.13 | 1.11 | 0.98  | 0.9  | 1.04 | 1.05  | 1.13  | 0.99 |
| 0.89 | 9.33 | 1.82 | 0.65 | 0.67 | 1.87  | 0.98 | 1.08 | 0.54  | 1.79  | 1.13 |
| 0.81 | 0.98 | 2.25 | 1.23 | 1.02 | 1.15  | 0.94 | 1.08 | 1.12  | 0.97  | 0.67 |
| 1.06 | 1.02 | 0.61 | 0.96 | 1.14 | 0.8   | 0.8  | 0.99 | 1.37  | 0.68  | 1.01 |
| 0.7  | 1.84 | 0.96 | 0.96 | 1.41 | 0.72  | 1.08 | 0.93 | 2.78  | 1.86  | 1.02 |
| 1.13 | 3.13 | 1.46 | 1.17 | 0.91 | 0.86  | 3.08 | 1.14 | 2.83  | 7.72  | 1.07 |
| 0.66 | 1.51 | 0.96 | 0.44 | 1.05 | 0.46  | 1.32 | 0.61 | 0.19  | 0.88  | 1.06 |
| 1.16 | 0.61 | 0.22 | 0.65 | 1.06 | 0.8   | 1.11 | 0.79 | 1.42  | 0.52  | 1.36 |
| 1.15 | 5.33 | 2.37 | 0.46 | 0.32 | 0.64  | 0.84 | 7.6  | 0.43  | 0.46  | 1.05 |
| 2.16 | 1    | 1.43 | 1.51 | 1.01 | 1.79  | 1.08 | 4.66 | 1.46  | 0.01  | 0.65 |
| 1.43 | 1.31 | 0.88 | 1.42 | 1.13 | 1.73  | 1.23 | 0.73 | 0.85  | 0.83  | 0.85 |
| 1.22 | 0.81 | 0.76 | 0.7  | 0.55 | 0.63  | 1.02 | 1.61 | 1.21  | 0.45  | 1.6  |
| 0.92 | 7.08 | 0.45 | 1.04 | 0.79 | 0.92  | 1    | 0.89 | 1.67  | 1.67  | 1.06 |
| 1.61 | 0.37 | 0.53 | 2.23 | 1.37 | 1.53  | 1.6  | 1    | 0.82  | 2.36  | 0.7  |
| 1.02 | 2.94 | 2.51 | 0.95 | 1.13 | 10.63 | 1.12 | 3.74 | 1.23  | 2.03  | 0.81 |

|      |       |      |       |       |      |      |      |       |       |      |
|------|-------|------|-------|-------|------|------|------|-------|-------|------|
| 1.04 | 15.88 | 0.88 | 1.08  | 1.55  | 0.82 | 1.09 | 1.18 | 1.03  | 24.09 | 0.78 |
| 0.99 | 0.58  | 0.8  | 1.65  | 0.92  | 1.33 | 0.91 | 1.22 | 0.8   | 0.91  | 0.85 |
| 1    | 1.03  | 1.34 | 7.94  | 1.14  | 0.45 | 1.04 | 1.08 | 1.26  | 3.25  | 1.88 |
| 0.88 | 1.16  | 1.86 | 2.39  | 1.37  | 1.94 | 0.92 | 1.71 | 1.7   | 9.22  | 0.97 |
| 1.21 | 2.03  | 1.17 | 0.95  | 0.86  | 1    | 1.03 | 1.19 | 1     | 1.19  | 1.1  |
| 1.65 | 0.64  | 1.87 | 1.36  | 2.45  | 1.17 | 1.31 | 0.17 | 2.14  | 1.13  | 1.16 |
| 0.6  | 0.58  | 2.55 | 0.17  | 1.02  | 1.42 | 0.91 | 1.1  | 2.23  | 0.12  | 0.93 |
| 1.26 | 0.92  | 0.6  | 1.03  | 1.13  | 1.37 | 1.3  | 0.81 | 0.88  | 2.54  | 1.23 |
| 6.85 | 1.11  | 1.01 | 0.72  | 1.59  | 0.59 | 0.82 | 1.4  | 0.73  | 0.99  | 1.11 |
| 1.61 | 1.2   | 1.53 | 1.21  | 1.09  | 0.84 | 1.32 | 6.59 | 1.16  | 0.86  | 1.13 |
| 0.5  | 0.88  | 2.99 | 1.21  | 0.76  | 1.23 | 0.98 | 2.81 | 12.19 | 2.33  | 0.69 |
| 1.07 | 2.5   | 1.62 | 1     | 0.77  | 0.99 | 1.04 | 0.65 | 1.15  | 5.46  | 1.22 |
| 1.35 | 16    | 1.77 | 1.42  | 0.75  | 1.08 | 0.97 | 1.69 | 0.84  | 3.56  | 1.38 |
| 0.99 | 1.12  | 1.6  | 0.68  | 0.63  | 0.78 | 1.6  | 1.19 | 1.53  | 0.42  | 0.92 |
| 0.87 | 1     | 0.97 | 0.7   | 0.97  | 0.56 | 0.87 | 1.78 | 1.32  | 0.5   | 1.66 |
| 9.99 | 0.05  | 0.07 | 7.48  | 11.64 | 0.87 | 8.4  | 3.73 | 0.1   | 42.98 | 0.42 |
| 1.44 | 1.04  | 1.77 | 0.24  | 1.63  | 0.67 | 1.4  | 2.44 | 1.84  | 1     | 1.45 |
| 1.29 | 0.82  | 0.03 | 0.28  | 0.83  | 0.68 | 1.04 | 0.55 | 1.55  | 1.36  | 0.26 |
| 1.21 | 0.82  | 2.58 | 0.94  | 0.83  | 1.5  | 1.04 | 1.1  | 1.11  | 1.27  | 0.92 |
| 1.04 | 0.99  | 10.9 | 15.91 | 5.35  | 2.63 | 1.04 | 1.2  | 3.04  | 5.05  | 0.91 |
| 1.25 | 7.41  | 0.77 | 6.22  | 0.98  | 2.25 | 1.91 | 1.14 | 3.15  | 0.51  | 1.21 |
| 1.2  | 1.73  | 1.1  | 0.9   | 1.18  | 1.18 | 0.99 | 0.69 | 1.19  | 1.03  | 1.02 |
| 0.93 | 0.24  | 9.75 | 0.89  | 1.06  | 2.41 | 0.83 | 1.11 | 0.66  | 0.87  | 0.71 |
| 0.8  | 0.93  | 0.73 | 1.37  | 1.66  | 1.07 | 1.09 | 0.92 | 1.16  | 0.54  | 1.23 |
| 1.17 | 1.26  | 0.91 | 1.22  | 1.32  | 1.72 | 1.08 | 0.92 | 4.49  | 0.73  | 0.82 |
| 0.9  | 0.52  | 5.33 | 0.66  | 0.93  | 1.05 | 1.06 | 0.94 | 1.23  | 0.82  | 0.76 |
| 0.99 | 3.87  | 2.6  | 0.87  | 0.87  | 1.06 | 1.05 | 1.22 | 1.01  | 0.77  | 1.07 |
| 1    | 0.86  | 0.99 | 2.05  | 0.98  | 2.08 | 1.15 | 2.44 | 0.12  | 1.13  | 1.06 |
| 0.79 | 0.9   | 4.22 | 0.81  | 0.86  | 1.15 | 1.02 | 1.15 | 0.62  | 0.34  | 1.23 |
| 0.89 | 3.59  | 2.07 | 0.77  | 1.03  | 1.05 | 1.04 | 3.75 | 0.82  | 1.36  | 1.07 |
| 1.07 | 4.61  | 0.5  | 1.28  | 0.95  | 0.77 | 1.07 | 3.23 | 1.21  | 1.13  | 1.01 |
| 0.73 | 3.67  | 2.62 | 0.48  | 0.52  | 1.16 | 0.87 | 0.99 | 0.55  | 1.31  | 0.82 |
| 1.39 | 2.6   | 0.94 | 0.28  | 1.06  | 2.96 | 0.97 | 5.49 | 0.91  | 2.88  | 1.93 |

|      |      |      |      |      |      |      |      |      |       |      |
|------|------|------|------|------|------|------|------|------|-------|------|
| 1.31 | 1.39 | 1.25 | 2.59 | 1.03 | 1.31 | 0.99 | 1.45 | 2.45 | 0.66  | 1.31 |
| 0.83 | 0.47 | 1.39 | 7.25 | 1.05 | 2.56 | 0.99 | 2.12 | 1.04 | 1.22  | 0.86 |
| 0.75 | 0.77 | 3.64 | 1.39 | 1.1  | 0.95 | 0.92 | 2.08 | 1.27 | 2.66  | 0.9  |
| 4.71 | 0.94 | 0.77 | 0.85 | 1.36 | 1.38 | 0.8  | 3.28 | 0.78 | 1.83  | 1.05 |
| 1.72 | 1.31 | 1.77 | 2.45 | 2.68 | 1.35 | 1.29 | 0.15 | 1.16 | 1.75  | 1.48 |
| 0.5  | 0.41 | 0.69 | 0.6  | 1.05 | 0.91 | 1.34 | 0.59 | 0.45 | 3.24  | 0.93 |
| 1.47 | 2.38 | 2.57 | 0.69 | 0.95 | 0.88 | 0.88 | 1.34 | 0.79 | 1.45  | 1.44 |
| 0.94 | 0.66 | 1.24 | 1.19 | 1.25 | 0.79 | 1.03 | 1.72 | 1.31 | 1.16  | 0.67 |
| 0.57 | 0.65 | 3.35 | 0.86 | 1.14 | 1.06 | 1.05 | 3.57 | 0.94 | 1.29  | 0.95 |
| 1.01 | 2.38 | 0.93 | 1.75 | 1.05 | 0.89 | 1.29 | 3.09 | 4.29 | 4.37  | 1.29 |
| 0.91 | 1.54 | 4.3  | 1.08 | 0.86 | 0.79 | 1.15 | 1.06 | 0.99 | 0.68  | 0.96 |
| 1.14 | 1.23 | 5.83 | 0.85 | 0.93 | 1.04 | 1.1  | 0.93 | 1.07 | 18.48 | 1.09 |
| 0.73 | 1    | 1.19 | 0.54 | 0.79 | 0.39 | 0.79 | 0.96 | 1.02 | 0.96  | 1.48 |
| 0.87 | 0.72 | 1.16 | 0.52 | 1.32 | 1.39 | 0.96 | 1.02 | 0.74 | 0.68  | 1    |
| 1.26 | 1.67 | 1.18 | 1.25 | 1.18 | 3.04 | 1.23 | 0.97 | 0.58 | 1.81  | 1.02 |
| 1.24 | 1.46 | 2.01 | 0.99 | 1.17 | 2.76 | 0.92 | 1.57 | 4.46 | 2.83  | 1.03 |
| 0.92 | 1.16 | 0.74 | 2.48 | 1.15 | 1.58 | 0.93 | 0.56 | 0.86 | 2.35  | 1.08 |
| 1.19 | 1.02 | 1.42 | 3.23 | 1.33 | 1.87 | 0.96 | 1.6  | 2.37 | 9.33  | 1.08 |
| 1.2  | 5.51 | 0.98 | 0.93 | 1.23 | 1    | 1.2  | 1.13 | 0.95 | 0.53  | 2.32 |
| 0.7  | 1.35 | 1.73 | 0.66 | 1.19 | 1.61 | 1.08 | 0.95 | 1.02 | 1.32  | 0.77 |
| 0.98 | 0.55 | 0.42 | 0.88 | 0.83 | 0.83 | 0.83 | 1.07 | 0.93 | 1.26  | 1.33 |
| 0.71 | 0.26 | 2.87 | 1.15 | 1.15 | 0.78 | 1.12 | 1.23 | 1.05 | 0.74  | 1.14 |
| 1.1  | 1.11 | 1.26 | 0.92 | 1.12 | 1.02 | 1.08 | 1.35 | 0.99 | 0.79  | 1.08 |
| 1.86 | 0.85 | 6.42 | 0.36 | 0.89 | 1.44 | 0.94 | 8.69 | 0.91 | 0.39  | 1    |
| 0.88 | 0.91 | 0.78 | 0.44 | 0.78 | 0.67 | 0.92 | 4.66 | 0.84 | 7.96  | 0.87 |
| 1.08 | 4.75 | 0.72 | 0.42 | 1.35 | 0.96 | 0.84 | 1.77 | 0.7  | 1.92  | 1.28 |
| 1.29 | 0.97 | 0.59 | 0.89 | 1    | 1.31 | 0.97 | 1.05 | 0.9  | 1.21  | 1.02 |
| 1.33 | 0.89 | 0.57 | 1.86 | 1.42 | 2.98 | 1.03 | 0.21 | 0.88 | 1     | 1.01 |
| 0.79 | 1.65 | 0.42 | 0.52 | 0.76 | 1.45 | 0.78 | 2.31 | 0.81 | 0.68  | 1.14 |
| 0.82 | 1.46 | 0.78 | 0.83 | 0.91 | 0.97 | 0.93 | 6.54 | 0.67 | 1.9   | 1.02 |
| 0.84 | 0.84 | 4.11 | 0.84 | 0.98 | 2.1  | 0.97 | 3.02 | 0.92 | 0.65  | 0.88 |
| 0.99 | 0.58 | 0.8  | 1.65 | 0.92 | 1.33 | 0.91 | 1.22 | 0.8  | 0.91  | 0.85 |
| 1.09 | 1.33 | 0.28 | 0.61 | 1.01 | 0.64 | 1.05 | 1.04 | 0.74 | 0.87  | 1.65 |

|      |       |      |      |      |      |      |      |      |      |      |
|------|-------|------|------|------|------|------|------|------|------|------|
| 0.89 | 3.97  | 0.47 | 0.61 | 1.24 | 0.72 | 1.21 | 1.28 | 0.46 | 2.46 | 1.37 |
| 0.82 | 1.05  | 1.11 | 1.14 | 0.93 | 0.65 | 1    | 2.37 | 1.12 | 2.9  | 1.26 |
| 1.09 | 1.92  | 1.39 | 0.84 | 0.9  | 0.99 | 1.13 | 0.97 | 0.63 | 2.18 | 0.84 |
| 0.91 | 1.02  | 1.38 | 0.76 | 1.26 | 0.86 | 0.99 | 1.88 | 1.5  | 1.16 | 1.31 |
| 0.98 | 4.74  | 2.67 | 0.94 | 0.71 | 1.07 | 0.86 | 1.38 | 0.81 | 0.9  | 0.87 |
| 0.9  | 4     | 0.33 | 0.67 | 0.99 | 0.82 | 0.95 | 1.03 | 1.17 | 1    | 1    |
| 1    | 15.75 | 1.36 | 0.93 | 0.99 | 1.03 | 0.95 | 0.92 | 0.82 | 0.67 | 1.14 |
| 0.92 | 4.44  | 2.83 | 1.02 | 1.11 | 1.12 | 1.24 | 1.09 | 1.05 | 1.4  | 0.83 |
| 1.23 | 4.13  | 1.05 | 0.63 | 0.48 | 1.23 | 0.76 | 2.86 | 1.96 | 1.15 | 1.27 |
| 1.06 | 1.47  | 0.54 | 5.78 | 1.04 | 1.42 | 0.89 | 0.67 | 1.11 | 0.17 | 1.93 |
| 1.14 | 2.64  | 0.52 | 0.79 | 1.67 | 2.15 | 1    | 0.74 | 1.23 | 0.05 | 1.14 |
| 1.06 | 0.66  | 2.85 | 0.68 | 1.11 | 1.07 | 1.07 | 1.01 | 1.13 | 1.65 | 1.18 |
| 1.07 | 1.29  | 1.52 | 2.8  | 1.53 | 2.7  | 0.95 | 1.84 | 1.58 | 9.81 | 1.2  |
| 1.09 | 1.81  | 0.96 | 0.88 | 0.86 | 1.46 | 1.03 | 0.4  | 1.65 | 0.43 | 0.81 |
| 1.38 | 0.62  | 1.37 | 0.54 | 0.95 | 0.77 | 1.42 | 2.02 | 0.94 | 4.55 | 0.59 |
| 1.1  | 1.55  | 0.62 | 0.7  | 1.3  | 1.08 | 1.18 | 1.13 | 1.05 | 4.35 | 1.14 |
| 0.91 | 0.51  | 0.67 | 1.16 | 0.99 | 1.08 | 1.01 | 0.8  | 0.85 | 0.72 | 0.87 |
| 0.9  | 1.32  | 1.06 | 3.26 | 1    | 0.79 | 0.82 | 1.69 | 2.16 | 0.91 | 1.24 |
| 0.96 | 2.92  | 1.9  | 0.81 | 1.25 | 0.84 | 0.96 | 1.17 | 0.94 | 0.85 | 0.96 |
| 0.84 | 0.66  | 1.03 | 0.8  | 0.83 | 1.33 | 0.88 | 1.31 | 2.12 | 1.2  | 0.9  |
| 1.04 | 2.63  | 1.24 | 1.02 | 1.08 | 0.81 | 0.91 | 0.91 | 1.1  | 0.53 | 1.06 |
| 1.21 | 1.65  | 2.51 | 0.71 | 1.23 | 1.74 | 0.89 | 1.11 | 0.86 | 1.33 | 0.73 |
| 1.06 | 1.05  | 4.28 | 1.12 | 1.09 | 2.9  | 0.8  | 4.75 | 4.21 | 2.49 | 0.94 |
| 0.94 | 0.85  | 2.39 | 0.93 | 0.82 | 0.94 | 0.99 | 0.7  | 1.44 | 1.04 | 0.81 |
| 1.38 | 0.72  | 0.98 | 0.63 | 1.21 | 0.96 | 0.86 | 1.18 | 0.98 | 0.99 | 0.92 |
| 1.15 | 3.32  | 0.97 | 0.61 | 0.83 | 1.08 | 0.95 | 1.06 | 0.62 | 0.58 | 0.93 |
| 1.29 | 0.98  | 1.95 | 2.28 | 1.06 | 0.93 | 1.18 | 0.6  | 1.4  | 0.74 | 1.17 |
| 0.82 | 0.88  | 1.28 | 2.59 | 0.88 | 0.96 | 0.83 | 0.99 | 1.26 | 1.45 | 1.24 |
| 1.07 | 0.96  | 1.79 | 0.8  | 0.84 | 1.17 | 1.15 | 0.94 | 0.79 | 1.1  | 1    |
| 1.19 | 0.5   | 1.11 | 1.02 | 0.93 | 1.06 | 0.79 | 0.91 | 0.89 | 0.67 | 1.42 |
| 0.81 | 1.14  | 4.5  | 0.94 | 1.04 | 2.78 | 0.76 | 4.44 | 0.81 | 2.76 | 0.74 |
| 1.01 | 2.62  | 1.35 | 8.45 | 0.9  | 1.14 | 1.01 | 2.11 | 0.87 | 6.27 | 0.94 |
| 1.1  | 2.72  | 0.82 | 1.03 | 0.98 | 1.69 | 1    | 1.7  | 0.97 | 1.28 | 1.03 |

|      |      |      |      |      |      |      |      |      |       |      |
|------|------|------|------|------|------|------|------|------|-------|------|
| 6.69 | 1.44 | 1.2  | 0.71 | 1.83 | 0.65 | 0.97 | 3.54 | 0.84 | 0.77  | 0.72 |
| 0.82 | 0.9  | 3.45 | 1    | 1.15 | 2.37 | 0.86 | 4.74 | 0.81 | 2.1   | 0.83 |
| 1.01 | 0.94 | 1.03 | 0.94 | 0.98 | 1.03 | 0.98 | 1.23 | 0.93 | 0.89  | 1.04 |
| 1.19 | 1.04 | 1.46 | 0.9  | 1.43 | 1.23 | 0.96 | 3.39 | 1    | 0.9   | 0.94 |
| 0.51 | 0.24 | 2.28 | 1.11 | 1.21 | 1.12 | 0.83 | 0.91 | 0.88 | 2.33  | 1.06 |
| 0.99 | 1.52 | 1.08 | 0.89 | 0.95 | 0.94 | 0.93 | 0.87 | 0.9  | 1.18  | 0.95 |
| 0.7  | 0.72 | 1.2  | 0.55 | 0.76 | 1.16 | 0.69 | 2.07 | 0.24 | 2.62  | 0.82 |
| 0.93 | 0.73 | 0.67 | 1.03 | 1    | 0.64 | 1.2  | 1.01 | 1.11 | 1.02  | 0.96 |
| 0.94 | 3.48 | 2.44 | 0.83 | 1.05 | 0.93 | 0.94 | 1.42 | 1.11 | 2.01  | 1.18 |
| 0.68 | 0.51 | 0.66 | 0.91 | 0.76 | 0.62 | 0.67 | 2.6  | 0.36 | 3.52  | 0.84 |
| 0.73 | 2.1  | 5    | 0.55 | 1.35 | 0.54 | 0.85 | 0.92 | 0.61 | 2.3   | 1.74 |
| 0.83 | 1.26 | 1.21 | 2.45 | 0.83 | 0.35 | 0.77 | 1.43 | 0.94 | 0.81  | 0.93 |
| 0.92 | 2.67 | 1.7  | 0.75 | 0.91 | 0.98 | 0.8  | 1.36 | 0.82 | 1.95  | 0.8  |
| 0.91 | 0.08 | 0.51 | 0.81 | 1.19 | 1.07 | 1.13 | 2.21 | 1.73 | 3.18  | 1.07 |
| 0.92 | 0.96 | 0.86 | 0.61 | 1.4  | 0.79 | 1.07 | 2.25 | 1.57 | 0.86  | 1.31 |
| 1.06 | 0.97 | 0.5  | 0.65 | 0.73 | 0.79 | 1.19 | 1.58 | 1.35 | 0.96  | 1.37 |
| 1.19 | 4.34 | 1.56 | 0.55 | 0.95 | 4.44 | 0.97 | 1.99 | 1.9  | 1.71  | 1.13 |
| 0.78 | 2.91 | 2.24 | 0.97 | 1.02 | 0.87 | 1    | 0.98 | 2.55 | 0.67  | 1.09 |
| 1.21 | 0.73 | 1.52 | 0.32 | 1.38 | 2.82 | 1.01 | 0.79 | 1.01 | 1.38  | 0.98 |
| 1.12 | 1.54 | 0.65 | 0.56 | 1.27 | 1.08 | 0.83 | 1.07 | 1.69 | 1.02  | 1.17 |
| 1    | 1.1  | 1.86 | 0.87 | 1.05 | 1.74 | 0.89 | 0.78 | 1.2  | 0.99  | 0.81 |
| 0.57 | 1.71 | 1.03 | 0.62 | 0.66 | 1.06 | 0.63 | 0.05 | 2.37 | 0.05  | 1.46 |
| 0.96 | 0.97 | 0.68 | 1.29 | 1.24 | 0.5  | 1    | 7.14 | 0.56 | 3.21  | 1.05 |
| 3.2  | 0.91 | 1.81 | 0.65 | 1.84 | 0.6  | 0.88 | 4.25 | 1.07 | 0.88  | 0.89 |
| 1.13 | 0.97 | 0.72 | 1.02 | 0.95 | 1.79 | 1.21 | 1.06 | 1.13 | 0.94  | 1.15 |
| 1.07 | 1.13 | 1.87 | 2.09 | 0.99 | 0.71 | 0.91 | 1.75 | 0.06 | 34.58 | 0.65 |
| 0.87 | 1.62 | 2.79 | 0.96 | 1.07 | 1.25 | 1.26 | 0.95 | 0.93 | 1.33  | 1.42 |
| 0.95 | 1.07 | 0.56 | 0.93 | 1.03 | 0.98 | 1.07 | 0.89 | 1.16 | 2.91  | 0.97 |
| 1.12 | 1.59 | 0.83 | 0.46 | 1.09 | 2.78 | 1.03 | 1.3  | 1.03 | 1.25  | 0.9  |
| 0.84 | 1.44 | 3.98 | 1.08 | 1.14 | 0.8  | 0.99 | 1.27 | 0.83 | 3.69  | 0.97 |
| 1.16 | 1.54 | 0.55 | 1.08 | 0.91 | 0.89 | 1.02 | 1    | 1.68 | 5.28  | 1.19 |
| 0.84 | 0.93 | 5    | 0.97 | 0.81 | 0.85 | 0.87 | 1.33 | 0.87 | 0.97  | 1.04 |
| 1    | 1.43 | 1.25 | 1.46 | 0.89 | 0.55 | 1.03 | 0.55 | 1.88 | 1.78  | 0.82 |



|      |      |      |      |      |       |      |      |      |      |      |
|------|------|------|------|------|-------|------|------|------|------|------|
| 1.18 | 1    | 1.21 | 1.46 | 1.05 | 1.37  | 1.06 | 0.68 | 1.18 | 1.32 | 1.38 |
| 0.94 | 1.25 | 1.17 | 0.49 | 1.07 | 0.96  | 0.97 | 0.94 | 1.42 | 0.31 | 1.61 |
| 0.83 | 2.5  | 0.77 | 0.77 | 0.85 | 0.91  | 1.15 | 0.93 | 0.7  | 1.42 | 0.92 |
| 0.62 | 0.19 | 1.11 | 0.64 | 0.87 | 0.98  | 0.75 | 1.05 | 0.13 | 0.89 | 0.88 |
| 0.93 | 2.41 | 1.37 | 2.58 | 0.73 | 1.92  | 0.69 | 1.3  | 3    | 1.29 | 1.13 |
| 0.94 | 1.97 | 0.77 | 1.02 | 1.08 | 1.02  | 0.92 | 1.05 | 3.43 | 1.15 | 0.94 |
| 0.99 | 1.45 | 1.07 | 0.32 | 1.03 | 0.91  | 1.02 | 5.9  | 0.51 | 0.88 | 0.85 |
| 0.8  | 1.12 | 4.43 | 0.55 | 0.96 | 1.15  | 1.16 | 0.74 | 1.08 | 1.1  | 1.06 |
| 3.39 | 1.34 | 1.91 | 0.88 | 2    | 0.61  | 0.7  | 2.61 | 0.42 | 1.8  | 1.06 |
| 0.94 | 7    | 4.76 | 0.76 | 0.71 | 2.01  | 1.03 | 0.84 | 1.66 | 0.77 | 1    |
| 0.77 | 0.33 | 6.33 | 0.69 | 0.95 | 0.81  | 1.21 | 0.89 | 0.92 | 0.79 | 1.17 |
| 0.83 | 2.69 | 3.21 | 0.91 | 1.04 | 1.21  | 1.31 | 0.42 | 0.93 | 0.79 | 0.59 |
| 0.76 | 1.19 | 3.5  | 1.02 | 0.75 | 0.6   | 1.08 | 1.54 | 1.21 | 1.55 | 1.25 |
| 0.96 | 0.5  | 3.33 | 0.79 | 1.08 | 3.42  | 0.95 | 0.51 | 1.03 | 1.78 | 1.12 |
| 0.91 | 5.17 | 2.64 | 1.11 | 0.69 | 1.01  | 1.13 | 1.22 | 1.5  | 0.99 | 1.38 |
| 0.67 | 1.59 | 1.18 | 1.03 | 0.71 | 1     | 1.19 | 0.66 | 1.13 | 0.94 | 0.73 |
| 0.74 | 0.75 | 0.59 | 0.85 | 0.95 | 0.85  | 0.85 | 1.03 | 2.17 | 1.27 | 0.85 |
| 0.84 | 3.4  | 1.15 | 1.24 | 0.88 | 1.26  | 0.92 | 2.94 | 0.53 | 0.33 | 0.85 |
| 2.21 | 1.05 | 1.29 | 2.33 | 1.09 | 2.4   | 0.97 | 2.77 | 9.83 | 2.77 | 0.97 |
| 0.76 | 0.79 | 0.81 | 0.82 | 1.17 | 0.74  | 0.78 | 8.69 | 2.97 | 1.08 | 0.99 |
| 1.33 | 6.9  | 1.48 | 1    | 1.08 | 1.28  | 0.9  | 1.38 | 2.9  | 3.85 | 1.02 |
| 0.68 | 0.52 | 0.65 | 0.79 | 0.74 | 0.5   | 0.69 | 1.88 | 0.4  | 2.24 | 0.86 |
| 0.93 | 0.63 | 1.64 | 0.53 | 1.26 | 11.48 | 0.89 | 5.14 | 0.54 | 0.26 | 1.13 |
| 0.84 | 1.07 | 1.21 | 1.2  | 1.13 | 1.21  | 0.8  | 1.73 | 0.23 | 2.03 | 1.17 |
| 1.24 | 0.78 | 1.23 | 1.16 | 1.12 | 0.77  | 1.07 | 0.85 | 1.03 | 0.98 | 0.97 |
| 1.33 | 0.73 | 1.08 | 0.53 | 0.99 | 0.78  | 0.68 | 1.28 | 0.83 | 1.86 | 0.86 |
| 0.82 | 0.64 | 0.65 | 0.81 | 0.71 | 0.44  | 0.96 | 1.22 | 2.16 | 5.62 | 1.03 |
| 1.14 | 0.79 | 0.43 | 0.31 | 1.28 | 1.86  | 1.32 | 1.24 | 1.15 | 0.53 | 1.56 |
| 0.75 | 1.47 | 2.4  | 1.19 | 0.71 | 0.77  | 1.34 | 3.46 | 0.91 | 1.26 | 1.18 |
| 1.99 | 0.37 | 1.12 | 5.73 | 2.45 | 0.69  | 1.21 | 0.43 | 1.6  | 3.93 | 0.77 |
| 1.27 | 9.33 | 1.18 | 0.74 | 0.84 | 1.18  | 1.13 | 2.73 | 0.82 | 1.4  | 0.84 |
| 0.94 | 0.88 | 1.2  | 0.87 | 0.91 | 1.84  | 0.88 | 1.11 | 1.21 | 2.48 | 0.8  |
| 1.4  | 5.79 | 0.64 | 5.22 | 1.14 | 1.07  | 0.99 | 1.96 | 2.13 | 0.65 | 1.51 |

|      |       |      |      |      |      |      |       |       |       |      |
|------|-------|------|------|------|------|------|-------|-------|-------|------|
| 1.07 | 19.75 | 1.08 | 1.05 | 0.85 | 1.02 | 0.89 | 0.91  | 0.75  | 1.11  | 0.94 |
| 1.06 | 1.26  | 0.45 | 0.69 | 0.88 | 0.97 | 0.97 | 1.02  | 1.26  | 1.01  | 0.99 |
| 2.45 | 0.91  | 7.14 | 2.09 | 1.51 | 0.94 | 0.47 | 0.87  | 0.59  | 1.75  | 0.69 |
| 0.59 | 3.17  | 2.98 | 0.81 | 0.66 | 1.52 | 1.25 | 0.91  | 0.51  | 0.64  | 1.19 |
| 0.73 | 1.53  | 1.68 | 0.71 | 0.86 | 0.94 | 1.05 | 1.2   | 1.61  | 0.91  | 0.83 |
| 1.28 | 0.86  | 1.06 | 0.7  | 1.1  | 1.92 | 0.98 | 0.77  | 0.69  | 3.73  | 1.08 |
| 1.25 | 3.72  | 2.17 | 1.54 | 0.88 | 0.86 | 0.99 | 1.79  | 0.96  | 1.69  | 0.96 |
| 1.07 | 1.61  | 1.99 | 0.97 | 0.88 | 0.66 | 0.84 | 0.56  | 1.08  | 0.45  | 0.97 |
| 1.24 | 1.1   | 0.88 | 2.3  | 1.63 | 1.23 | 1.16 | 0.63  | 1.06  | 2.24  | 0.86 |
| 1.08 | 1     | 1.26 | 1.63 | 0.88 | 1.7  | 1.18 | 1.54  | 0.89  | 0.97  | 1.72 |
| 1.25 | 5.22  | 3.37 | 1.14 | 1.02 | 1.48 | 0.94 | 0.92  | 0.34  | 0.39  | 1.05 |
| 1.69 | 0.05  | 7.24 | 2.82 | 0.45 | 0.08 | 0.04 | 76.03 | 10.97 | 25.94 | 1.79 |
| 1.35 | 2.28  | 0.78 | 0.74 | 0.96 | 0.57 | 0.9  | 1.74  | 1.2   | 1.22  | 1.22 |
| 1.16 | 0.42  | 1.58 | 2.66 | 0.77 | 1.7  | 1.26 | 1.71  | 1.67  | 0.32  | 1.13 |

| 208815_x_at | 203451_at | 205215_at | 202670_at | 205932_s_at | 217555_at | 218902_at | 204772_s_at | 209341_s_at | 204020_at | 208986_at |
|-------------|-----------|-----------|-----------|-------------|-----------|-----------|-------------|-------------|-----------|-----------|
| 0.96        | 1.04      | 1.39      | 1.07      | 1.23        | 1.35      | 1.27      | 0.94        | 1.02        | 0.89      | 0.85      |
| 1           | 1.1       | 1.47      | 1.02      | 1.14        | 1.04      | 1.02      | 0.83        | 1.16        | 1.12      | 1.02      |
| 1.39        | 0.78      | 3.06      | 0.93      | 0.6         | 0.68      | 1.77      | 1.41        | 1.85        | 1.58      | 2.54      |
| 1.15        | 1.31      | 1.81      | 1.06      | 1.2         | 2.15      | 1.36      | 1.01        | 1.14        | 0.8       | 0.96      |
| 0.92        | 0.7       | 0.9       | 1.24      | 1.09        | 0.93      | 1.27      | 0.97        | 1.51        | 0.97      | 0.86      |
| 1.08        | 1.53      | 1.54      | 1.02      | 5.53        | 1.7       | 0.91      | 1.07        | 0.71        | 0.98      | 0.93      |
| 1.08        | 1.04      | 1.68      | 0.89      | 1.34        | 1.05      | 0.34      | 1.13        | 1.34        | 1.24      | 1.33      |
| 1.14        | 1.05      | 0.91      | 1.39      | 1.01        | 1.06      | 1.05      | 1.26        | 0.95        | 0.99      | 0.92      |
| 1.16        | 1.07      | 0.82      | 1.32      | 1.51        | 1.13      | 0.77      | 1.02        | 1           | 1.11      | 0.98      |
| 0.9         | 1.26      | 0.96      | 0.98      | 3.52        | 1.17      | 1.23      | 1.11        | 0.75        | 0.77      | 0.64      |
| 0.99        | 0.66      | 1.29      | 0.98      | 1.03        | 0.83      | 1.3       | 2.39        | 1.27        | 1.05      | 0.98      |
| 1.18        | 0.99      | 1.05      | 1.24      | 0.85        | 1         | 0.9       | 1.13        | 1.1         | 0.88      | 1.01      |
| 1.21        | 1.46      | 1.16      | 0.92      | 1.09        | 1.55      | 0.96      | 0.99        | 1.16        | 1.07      | 1.29      |
| 0.93        | 2.07      | 0.81      | 0.63      | 0.01        | 46.45     | 0.65      | 0.36        | 0.26        | 2.66      | 6         |
| 0.99        | 0.9       | 0.59      | 1.3       | 1.54        | 0.75      | 0.72      | 1.51        | 1.47        | 1.37      | 1.18      |
| 0.89        | 1.35      | 1.36      | 0.8       | 1.51        | 2.9       | 0.87      | 0.86        | 1.21        | 1         | 1.77      |
| 1.16        | 1.4       | 0.96      | 1.19      | 1.24        | 1.7       | 1.15      | 1.18        | 1.25        | 1.09      | 0.85      |
| 0.86        | 1.98      | 1.44      | 1.33      | 6           | 0.92      | 1.52      | 0.7         | 1.05        | 1.22      | 1.38      |
| 1.11        | 1.37      | 1.25      | 0.94      | 0.7         | 1.39      | 6.36      | 1.3         | 1.32        | 1.12      | 1.15      |
| 1.88        | 2.45      | 6.52      | 0.46      | 0.64        | 11.8      | 0.57      | 1.17        | 1.39        | 0.84      | 0.66      |
| 1.1         | 1.96      | 2.98      | 0.63      | 6.53        | 0.84      | 1.06      | 0.43        | 0.49        | 1.49      | 0.83      |
| 0.73        | 1.99      | 2.03      | 1.94      | 0.95        | 1.77      | 1.18      | 0.74        | 0.93        | 0.89      | 0.73      |
| 0.83        | 0.88      | 1.6       | 0.83      | 1.28        | 0.87      | 0.75      | 1.11        | 1.07        | 0.9       | 1.15      |
| 0.9         | 0.59      | 1.1       | 0.54      | 0.71        | 0.53      | 0.28      | 0.69        | 1.21        | 0.78      | 0.99      |
| 1.42        | 0.51      | 1.03      | 0.55      | 0.14        | 0.38      | 0.52      | 0.23        | 1.79        | 1.04      | 0.91      |
| 0.95        | 0.72      | 0.85      | 0.95      | 0.92        | 0.76      | 1.86      | 0.52        | 0.85        | 0.47      | 0.71      |
| 1.19        | 1.66      | 1.35      | 1.01      | 0.82        | 1.62      | 0.88      | 0.84        | 1.14        | 0.71      | 0.84      |
| 0.88        | 0.91      | 1.53      | 1.05      | 0.84        | 1.1       | 0.59      | 0.96        | 0.97        | 0.74      | 0.78      |
| 0.57        | 1.1       | 1.06      | 0.95      | 2.74        | 1.41      | 1.47      | 1.21        | 0.5         | 1.01      | 1.03      |
| 0.95        | 1.05      | 1.19      | 1.11      | 1.19        | 0.93      | 1.27      | 1.02        | 0.83        | 1.14      | 0.83      |

|      |      |      |      |      |      |      |      |      |      |      |
|------|------|------|------|------|------|------|------|------|------|------|
| 1.65 | 1.29 | 0.8  | 1.29 | 3.69 | 0.39 | 0.62 | 0.87 | 0.69 | 1    | 0.94 |
| 1.3  | 2.79 | 1.02 | 1.66 | 8.14 | 1.82 | 0.83 | 2.68 | 3.19 | 2.51 | 1.66 |
| 0.95 | 1.58 | 1.71 | 1.01 | 1.18 | 1.11 | 1.12 | 1.18 | 1.26 | 1.11 | 1.07 |
| 1.19 | 0.7  | 1.58 | 0.96 | 0.72 | 1.18 | 0.4  | 0.9  | 0.76 | 0.56 | 0.79 |
| 1.43 | 1.82 | 0.23 | 0.94 | 0.73 | 1.16 | 0.47 | 6.48 | 2.42 | 1.88 | 1.42 |
| 0.86 | 3.9  | 3.18 | 1.06 | 3.14 | 0.82 | 5.39 | 0.88 | 0.78 | 0.58 | 1.21 |
| 2.11 | 2.09 | 1.46 | 1.42 | 1.98 | 4.28 | 2.09 | 1.14 | 0.93 | 0.57 | 0.62 |
| 1.01 | 0.76 | 0.9  | 0.85 | 1.29 | 1.19 | 1    | 0.8  | 0.78 | 0.77 | 0.95 |
| 1.08 | 0.42 | 1.4  | 0.89 | 3.54 | 1.51 | 0.71 | 0.45 | 0.89 | 1.88 | 1.25 |
| 0.82 | 1.49 | 1.15 | 0.95 | 2.54 | 0.66 | 0.4  | 1.14 | 1.88 | 1    | 1.14 |
| 1    | 1.23 | 1.46 | 1.01 | 1.34 | 1.27 | 0.99 | 1.55 | 1.12 | 1.03 | 0.95 |
| 1.08 | 1.19 | 1.01 | 1.18 | 1    | 4.65 | 1.66 | 1.35 | 0.95 | 0.89 | 0.9  |
| 1.1  | 1.15 | 1.18 | 1    | 1.91 | 0.58 | 0.76 | 1.08 | 1.41 | 1.08 | 1.36 |
| 1.03 | 0.77 | 0.29 | 0.52 | 1.61 | 0.66 | 1.64 | 0.55 | 1.49 | 1.39 | 1.43 |
| 1.1  | 1.11 | 1.03 | 0.96 | 1.42 | 0.64 | 0.86 | 1.29 | 1.22 | 0.97 | 1.29 |
| 1.11 | 0.82 | 1.21 | 1.19 | 1.13 | 2.23 | 1.06 | 0.97 | 1.59 | 1.06 | 1.29 |
| 0.97 | 1.02 | 1.09 | 1.02 | 0.88 | 1.78 | 0.86 | 1.09 | 1.14 | 1.09 | 1.11 |
| 0.92 | 0.76 | 0.91 | 1    | 0.85 | 1.18 | 0.85 | 0.91 | 1.1  | 0.64 | 1.21 |
| 1    | 1.01 | 0.72 | 0.95 | 0.94 | 1.02 | 1.2  | 1.09 | 1.06 | 1    | 1.05 |
| 0.99 | 1.61 | 0.72 | 1.53 | 1.41 | 0.8  | 1.29 | 0.69 | 0.89 | 1.2  | 1.3  |
| 0.98 | 0.87 | 0.79 | 0.74 | 0.95 | 1.07 | 0.69 | 0.88 | 0.81 | 0.97 | 1.07 |
| 1.69 | 1.29 | 0.82 | 1.04 | 0.78 | 0.81 | 0.86 | 0.98 | 1.06 | 1.24 | 0.82 |
| 1    | 0.82 | 1.32 | 0.91 | 0.55 | 0.46 | 0.82 | 0.79 | 0.7  | 0.8  | 1.06 |
| 0.78 | 1.3  | 1.13 | 0.94 | 2.01 | 1.14 | 1.02 | 0.93 | 1.13 | 1.25 | 1.09 |
| 1.4  | 0.92 | 1.02 | 1.41 | 2.46 | 0.68 | 1.67 | 0.73 | 0.66 | 0.79 | 0.57 |
| 1.36 | 0.73 | 2.09 | 1.23 | 1.35 | 2.76 | 1.01 | 1.49 | 1.16 | 0.85 | 0.94 |
| 0.84 | 0.92 | 0.58 | 2.39 | 4.78 | 0.86 | 1.08 | 0.42 | 1.15 | 0.7  | 0.31 |
| 0.95 | 1.24 | 1.05 | 0.78 | 0.59 | 1.73 | 0.88 | 1.04 | 2.16 | 1    | 1.23 |
| 0.84 | 0.9  | 0.98 | 1    | 1.21 | 0.85 | 1.52 | 0.96 | 1.43 | 0.91 | 1.02 |
| 1.21 | 1.39 | 1.15 | 1.02 | 2.16 | 0.68 | 0.86 | 1.2  | 1.22 | 0.99 | 1.25 |
| 0.81 | 1.03 | 0.96 | 1.23 | 3.18 | 2    | 0.61 | 0.73 | 0.92 | 1.49 | 0.91 |
| 0.7  | 2.11 | 1.03 | 0.72 | 0.63 | 1.39 | 1.39 | 1.21 | 1.61 | 1.32 | 0.93 |
| 0.89 | 1.28 | 1.01 | 0.92 | 2.35 | 0.76 | 1.53 | 0.87 | 1.02 | 0.94 | 0.95 |

|      |      |      |      |       |      |      |       |      |      |      |
|------|------|------|------|-------|------|------|-------|------|------|------|
| 0.86 | 1.17 | 0.91 | 1.08 | 0.65  | 1.62 | 0.72 | 0.71  | 1.04 | 1.09 | 0.99 |
| 1.12 | 1.63 | 0.82 | 0.95 | 7.72  | 1.05 | 1.81 | 1.22  | 0.99 | 1.09 | 1.92 |
| 0.97 | 0.9  | 0.9  | 1.32 | 1.49  | 0.96 | 0.74 | 0.79  | 1    | 1.21 | 1.27 |
| 0.99 | 0.91 | 1.94 | 1.13 | 1.17  | 1.94 | 1.47 | 1.01  | 0.88 | 1.29 | 1.18 |
| 0.97 | 1.34 | 0.99 | 1.06 | 0.66  | 0.7  | 0.99 | 1.12  | 1.21 | 1.27 | 1.08 |
| 0.88 | 0.58 | 2.58 | 0.64 | 1.13  | 2.07 | 1.69 | 1.01  | 1.65 | 2.5  | 0.65 |
| 1.2  | 1.07 | 0.45 | 0.87 | 1.07  | 1.15 | 1.12 | 1.5   | 0.6  | 1.69 | 0.43 |
| 0.84 | 1.17 | 1.12 | 1.1  | 0.65  | 0.65 | 0.94 | 0.94  | 1.26 | 0.92 | 0.77 |
| 1.05 | 1.53 | 9.29 | 1.47 | 1.18  | 1.26 | 0.75 | 1.47  | 6.85 | 0.79 | 0.43 |
| 1.31 | 1.16 | 2.07 | 0.82 | 1.09  | 1.2  | 1.27 | 1.11  | 1.61 | 1.3  | 1.56 |
| 0.94 | 1.9  | 0.58 | 1.53 | 2.29  | 1.33 | 1.56 | 0.85  | 0.5  | 1.55 | 1.21 |
| 1.12 | 0.76 | 1.68 | 1.13 | 1.24  | 1.76 | 1.36 | 1.01  | 1.07 | 1.01 | 0.84 |
| 0.91 | 0.97 | 1.34 | 1.16 | 1.32  | 0.62 | 1.34 | 0.97  | 1.35 | 0.84 | 1.03 |
| 0.95 | 1.23 | 0.9  | 0.72 | 0.98  | 0.94 | 1.24 | 0.78  | 0.99 | 1.39 | 0.73 |
| 1.32 | 1.31 | 1.22 | 1.06 | 0.74  | 0.92 | 0.91 | 1.06  | 0.87 | 0.83 | 1    |
| 1.99 | 0.33 | 5.16 | 5.66 | 8.98  | 0.28 | 0.3  | 24.74 | 9.99 | 0.03 | 0.08 |
| 0.89 | 0.78 | 1.83 | 0.76 | 1.02  | 1.43 | 1.04 | 0.88  | 1.44 | 1.44 | 0.68 |
| 1.13 | 1.3  | 1.21 | 1.05 | 1.73  | 0.8  | 0.89 | 0.97  | 1.29 | 0.87 | 1.87 |
| 0.97 | 1.27 | 1.05 | 1.02 | 0.9   | 0.97 | 0.79 | 0.74  | 1.21 | 1.17 | 1.22 |
| 1.04 | 1.43 | 3.26 | 1.13 | 6.68  | 1.58 | 2.04 | 1.44  | 1.04 | 0.82 | 1.01 |
| 0.71 | 3.48 | 0.67 | 2.05 | 10.51 | 0.28 | 1.71 | 0.59  | 1.25 | 0.48 | 0.97 |
| 0.9  | 0.72 | 1.1  | 1    | 1.73  | 1.07 | 0.94 | 1.11  | 1.2  | 1.12 | 0.94 |
| 1.17 | 1.27 | 1.29 | 0.88 | 0.98  | 1.13 | 0.39 | 1.16  | 0.93 | 1.14 | 1.16 |
| 0.68 | 1.07 | 0.86 | 1.62 | 2.26  | 0.98 | 0.73 | 1.91  | 0.8  | 2.14 | 1.04 |
| 0.9  | 1.1  | 1.03 | 1.11 | 0.78  | 1.6  | 1.17 | 0.87  | 1.17 | 1.82 | 1    |
| 1.02 | 0.69 | 1.29 | 1.1  | 1.09  | 0.95 | 0.67 | 0.85  | 0.9  | 0.94 | 0.95 |
| 0.9  | 0.92 | 0.9  | 1.13 | 1.08  | 0.95 | 1.1  | 0.83  | 0.99 | 0.71 | 0.74 |
| 1.14 | 0.95 | 1    | 1.05 | 1.73  | 1.1  | 1.51 | 1.07  | 1    | 1.01 | 1.07 |
| 1.07 | 1.04 | 1.27 | 0.89 | 1.13  | 1.24 | 0.98 | 0.94  | 0.79 | 1.12 | 1.02 |
| 0.93 | 1.12 | 1.02 | 0.95 | 0.95  | 0.79 | 1.05 | 1.06  | 0.89 | 0.94 | 0.95 |
| 0.9  | 1.1  | 1.17 | 1.17 | 1.18  | 1.08 | 1.28 | 1.12  | 1.07 | 0.94 | 1.01 |
| 0.99 | 0.76 | 0.88 | 1.77 | 1.31  | 1.13 | 0.79 | 1     | 0.73 | 0.96 | 0.84 |
| 1.04 | 1.02 | 1.02 | 1.02 | 0.99  | 0.7  | 1.37 | 0.82  | 1.39 | 1.03 | 1.13 |

|      |      |      |      |      |      |      |      |      |      |      |
|------|------|------|------|------|------|------|------|------|------|------|
| 1.2  | 1.18 | 1.41 | 0.97 | 1.6  | 2.04 | 1    | 0.82 | 1.31 | 1.16 | 0.88 |
| 1.18 | 1.16 | 1    | 1.01 | 0.85 | 0.68 | 1.17 | 0.8  | 0.83 | 0.96 | 1.26 |
| 0.81 | 1.05 | 1.22 | 1.16 | 1.23 | 0.55 | 1.18 | 0.95 | 0.75 | 1.21 | 1.01 |
| 0.86 | 2.25 | 1.33 | 1.03 | 0.52 | 1.62 | 1.3  | 1.37 | 4.71 | 0.67 | 1.01 |
| 1.11 | 0.41 | 2.07 | 1    | 1.05 | 2.28 | 0.86 | 1.03 | 1.72 | 1.49 | 1.04 |
| 1.54 | 1.24 | 1.78 | 0.62 | 0.71 | 0.3  | 0.65 | 0.74 | 0.5  | 0.68 | 0.89 |
| 1.05 | 1.26 | 1.22 | 1.27 | 1.64 | 0.94 | 0.81 | 1.07 | 1.47 | 0.94 | 0.93 |
| 1.31 | 1.05 | 1.35 | 0.96 | 1.15 | 0.95 | 0.87 | 0.86 | 0.94 | 0.85 | 1.21 |
| 1.56 | 1.18 | 1.34 | 0.97 | 1.83 | 1.44 | 0.86 | 0.94 | 0.57 | 0.64 | 1.33 |
| 1.19 | 1.24 | 1.51 | 1.01 | 1.24 | 0.79 | 0.97 | 0.99 | 1.01 | 1.11 | 0.93 |
| 1.28 | 0.8  | 1.71 | 1.25 | 1.22 | 1.92 | 1.06 | 1.02 | 0.91 | 0.87 | 0.98 |
| 0.99 | 1.28 | 1.24 | 1.14 | 0.94 | 2.07 | 1.31 | 0.87 | 1.14 | 1.1  | 1.19 |
| 1.32 | 0.67 | 1.28 | 1.39 | 1.46 | 1.26 | 1.78 | 1.39 | 0.73 | 0.93 | 0.75 |
| 1.25 | 0.83 | 1.03 | 1.26 | 0.78 | 0.93 | 0.57 | 1    | 0.87 | 0.92 | 0.98 |
| 0.96 | 1.15 | 0.76 | 0.94 | 1.26 | 1.05 | 0.99 | 1.05 | 1.26 | 1.06 | 1.25 |
| 1    | 2.37 | 1.54 | 1.07 | 3.23 | 1.26 | 1.79 | 0.99 | 1.24 | 1.22 | 1.15 |
| 0.92 | 0.94 | 0.71 | 1.07 | 0.8  | 0.9  | 1.24 | 0.76 | 0.92 | 1.05 | 0.98 |
| 1.15 | 1.08 | 1.43 | 1.29 | 1.25 | 1.18 | 1.76 | 1.21 | 1.19 | 1.11 | 1.06 |
| 1.08 | 1.1  | 0.94 | 1.07 | 0.97 | 0.62 | 1.13 | 0.95 | 1.2  | 0.78 | 0.71 |
| 0.89 | 0.93 | 1    | 1.24 | 1.08 | 1.71 | 1.47 | 1.6  | 0.7  | 1.19 | 0.84 |
| 1.02 | 1.53 | 0.97 | 0.84 | 1.68 | 1.39 | 1.03 | 1.03 | 0.98 | 1.66 | 1.19 |
| 1.02 | 1.03 | 1.32 | 1.16 | 1.28 | 0.91 | 1.18 | 1.07 | 0.71 | 1.18 | 1.02 |
| 0.93 | 0.99 | 0.46 | 0.91 | 0.92 | 1.65 | 1.13 | 0.94 | 1.1  | 0.97 | 1.12 |
| 0.76 | 1.17 | 0.62 | 0.79 | 0.58 | 0.99 | 2.95 | 1.05 | 1.86 | 1.63 | 1.25 |
| 1.15 | 0.76 | 0.47 | 0.71 | 0.8  | 1.25 | 1.7  | 1.05 | 0.88 | 0.95 | 1.14 |
| 1.25 | 0.46 | 0.57 | 1.12 | 0.87 | 1.24 | 0.54 | 0.91 | 1.08 | 0.47 | 0.97 |
| 0.93 | 0.87 | 1.16 | 0.93 | 0.82 | 1    | 1.01 | 0.92 | 1.29 | 0.91 | 1.07 |
| 0.6  | 0.81 | 0.76 | 0.85 | 1.23 | 1.99 | 1.5  | 0.86 | 1.33 | 0.88 | 1.49 |
| 1.3  | 0.81 | 0.93 | 1.7  | 1.42 | 0.6  | 0.51 | 0.89 | 0.79 | 0.82 | 0.76 |
| 1.04 | 0.76 | 1.22 | 0.86 | 1.2  | 1.39 | 1.12 | 1.03 | 0.82 | 0.93 | 0.97 |
| 0.79 | 0.91 | 0.76 | 0.97 | 4.24 | 0.77 | 1.12 | 0.78 | 0.84 | 0.92 | 0.67 |
| 1.12 | 1.63 | 0.82 | 0.95 | 7.72 | 1.05 | 1.81 | 1.22 | 0.99 | 1.09 | 1.92 |
| 1.02 | 1.35 | 1    | 1.19 | 1.12 | 1.41 | 0.89 | 1.27 | 1.09 | 1.1  | 1.14 |

|      |      |      |      |      |      |      |      |      |      |      |
|------|------|------|------|------|------|------|------|------|------|------|
| 0.99 | 1.01 | 0.75 | 1.6  | 1.58 | 1.71 | 0.98 | 1.45 | 0.89 | 1.3  | 1.18 |
| 1.03 | 1.05 | 1.02 | 0.97 | 0.99 | 1.08 | 0.95 | 1.19 | 0.82 | 0.81 | 1.1  |
| 1.2  | 1.06 | 1.04 | 0.94 | 1.73 | 0.34 | 1.23 | 0.66 | 1.09 | 1.04 | 0.99 |
| 1.14 | 0.81 | 1.33 | 0.94 | 1.04 | 1.12 | 1.23 | 1    | 0.91 | 1    | 1.13 |
| 1.04 | 1.03 | 0.83 | 1.01 | 0.67 | 1.84 | 0.67 | 0.91 | 0.98 | 1.08 | 0.99 |
| 1.03 | 1.01 | 0.68 | 1.11 | 0.98 | 1.27 | 1.04 | 1.08 | 0.9  | 0.98 | 1    |
| 1.08 | 0.84 | 0.82 | 0.99 | 1.02 | 0.73 | 1.2  | 0.93 | 1    | 0.92 | 1.03 |
| 0.83 | 1.04 | 1.02 | 0.85 | 0.83 | 0.8  | 1.28 | 0.67 | 0.92 | 1.06 | 1.27 |
| 1.01 | 0.77 | 0.93 | 2.45 | 0.98 | 1.73 | 1.47 | 0.91 | 1.23 | 1.32 | 2.7  |
| 0.97 | 0.93 | 0.84 | 1.1  | 0.84 | 0.7  | 1.38 | 0.79 | 1.06 | 0.99 | 1.07 |
| 1.08 | 0.89 | 1.52 | 0.83 | 0.53 | 1.47 | 1.05 | 1.36 | 1.14 | 0.88 | 1.21 |
| 0.97 | 1.19 | 0.99 | 1.52 | 1.02 | 1.95 | 0.8  | 0.82 | 1.06 | 1    | 1.18 |
| 1.05 | 0.98 | 1.27 | 1.18 | 1.89 | 1.18 | 1.72 | 1.2  | 1.07 | 1.2  | 1.21 |
| 0.94 | 1.24 | 1.15 | 0.73 | 0.79 | 2.21 | 1.53 | 0.92 | 1.09 | 1.28 | 0.95 |
| 0.64 | 0.97 | 0.74 | 0.82 | 3.43 | 0.44 | 0.45 | 0.65 | 1.38 | 1.46 | 1.36 |
| 1    | 1.37 | 0.87 | 1    | 1.08 | 1.56 | 1.07 | 0.93 | 1.1  | 0.98 | 0.98 |
| 0.96 | 1.4  | 0.69 | 0.96 | 1.1  | 1.07 | 0.89 | 1    | 0.91 | 1.03 | 0.96 |
| 1.29 | 1.4  | 1.23 | 0.97 | 2.1  | 1.1  | 1.03 | 0.85 | 0.9  | 1.02 | 1.04 |
| 1    | 0.9  | 1.29 | 1.03 | 0.91 | 1.07 | 0.8  | 0.92 | 0.96 | 0.83 | 0.83 |
| 0.87 | 1.52 | 0.97 | 1.22 | 0.7  | 0.97 | 0.85 | 1.02 | 0.84 | 1.19 | 1.02 |
| 1.1  | 1.1  | 1.86 | 1.17 | 0.65 | 1.07 | 1.46 | 1.1  | 1.04 | 1.13 | 1.01 |
| 1.49 | 0.84 | 1.51 | 1.08 | 2.18 | 0.94 | 0.46 | 0.7  | 1.21 | 1.16 | 1.58 |
| 1.05 | 1.12 | 1.06 | 1.01 | 6.42 | 0.92 | 1.02 | 1.19 | 1.06 | 1.03 | 1.25 |
| 0.88 | 0.86 | 1.38 | 0.83 | 0.99 | 1.65 | 1.37 | 1.16 | 0.94 | 1.08 | 1.25 |
| 1.13 | 0.88 | 0.93 | 1.1  | 1.09 | 0.94 | 1.32 | 0.84 | 1.38 | 1.12 | 0.98 |
| 0.68 | 1.16 | 1.26 | 0.89 | 0.9  | 1.05 | 1.06 | 0.77 | 1.15 | 1.18 | 0.75 |
| 1.12 | 0.68 | 1.36 | 0.96 | 0.94 | 0.91 | 0.88 | 0.95 | 1.29 | 0.91 | 0.76 |
| 1.22 | 1.33 | 1.48 | 0.98 | 1.16 | 1.23 | 1.25 | 1.12 | 0.82 | 0.99 | 0.9  |
| 0.96 | 0.92 | 1.64 | 1.01 | 1.12 | 0.66 | 1.05 | 0.86 | 1.07 | 1.08 | 1.12 |
| 0.93 | 0.86 | 0.84 | 0.77 | 0.85 | 1.57 | 0.97 | 0.93 | 1.19 | 1.03 | 0.7  |
| 1.13 | 1.03 | 1.06 | 0.9  | 9.13 | 1.11 | 0.85 | 1.28 | 0.81 | 0.7  | 1.01 |
| 1.01 | 0.96 | 1.02 | 1    | 1.2  | 1.23 | 0.8  | 1.06 | 1.01 | 0.85 | 0.96 |
| 1.01 | 0.9  | 1.13 | 1.09 | 1.12 | 1.05 | 0.8  | 1.05 | 1.1  | 1.02 | 0.92 |

|      |      |      |      |      |      |      |      |      |      |      |
|------|------|------|------|------|------|------|------|------|------|------|
| 1.33 | 0.95 | 3.08 | 2.38 | 0.92 | 0.87 | 0.69 | 1.27 | 6.69 | 0.66 | 0.6  |
| 1.08 | 1.18 | 1.27 | 1.18 | 3.32 | 0.97 | 0.85 | 1.25 | 0.82 | 1.01 | 1.15 |
| 1.08 | 1.08 | 0.82 | 0.96 | 1.01 | 1.01 | 0.93 | 1.16 | 1.01 | 1.03 | 0.91 |
| 0.97 | 0.64 | 0.97 | 1.06 | 0.67 | 1.11 | 1.34 | 0.93 | 1.19 | 1.18 | 1.1  |
| 1.49 | 1.53 | 2.87 | 0.52 | 1.11 | 0.28 | 0.68 | 1.04 | 0.51 | 0.61 | 1.2  |
| 0.98 | 1.23 | 0.95 | 0.71 | 1.05 | 1.31 | 1.2  | 1.21 | 0.99 | 0.88 | 1.01 |
| 1.62 | 1.37 | 0.83 | 1.3  | 5.23 | 0.28 | 0.66 | 0.88 | 0.7  | 1.02 | 0.92 |
| 1.01 | 0.86 | 0.69 | 1    | 1.07 | 1.11 | 1.4  | 0.85 | 0.93 | 1.01 | 1.19 |
| 0.92 | 1.3  | 0.92 | 1.09 | 1.32 | 0.99 | 1.18 | 1.15 | 0.94 | 1.03 | 1.1  |
| 1.62 | 1.65 | 0.77 | 1.04 | 3    | 0.59 | 0.6  | 0.87 | 0.68 | 1.02 | 0.99 |
| 1.33 | 1.37 | 0.9  | 1.09 | 1.58 | 1.52 | 1.18 | 0.97 | 0.73 | 1    | 1.38 |
| 1.28 | 1.32 | 1.25 | 1.17 | 0.87 | 0.98 | 0.52 | 1.34 | 0.83 | 0.93 | 0.92 |
| 1.31 | 0.72 | 0.88 | 0.95 | 0.91 | 0.57 | 0.84 | 0.99 | 0.92 | 0.81 | 0.99 |
| 0.95 | 0.8  | 1.17 | 0.95 | 2.86 | 0.56 | 0.93 | 0.9  | 0.91 | 0.97 | 1.01 |
| 1.05 | 0.77 | 1.2  | 0.91 | 1.02 | 0.97 | 1.12 | 1.01 | 0.92 | 1.06 | 1.25 |
| 0.98 | 1.05 | 0.93 | 1.11 | 0.76 | 0.87 | 0.71 | 1    | 1.06 | 1.05 | 1.13 |
| 1.16 | 1.19 | 1.54 | 0.98 | 1.18 | 1.44 | 1.14 | 0.99 | 1.19 | 1.03 | 0.93 |
| 0.9  | 0.95 | 0.78 | 1.07 | 0.64 | 0.51 | 1.17 | 0.92 | 0.78 | 0.93 | 0.92 |
| 1.15 | 0.71 | 0.99 | 0.92 | 3.68 | 2.09 | 0.93 | 1.27 | 1.21 | 1.3  | 1.36 |
| 1.08 | 0.82 | 1.72 | 1.1  | 1.32 | 2    | 0.8  | 1.18 | 1.12 | 1.31 | 1.45 |
| 0.94 | 0.95 | 1.11 | 0.94 | 0.93 | 1.69 | 2.1  | 1.12 | 1    | 0.78 | 0.59 |
| 1.45 | 1.02 | 1.12 | 1.03 | 1.94 | 1.78 | 1.09 | 1.44 | 0.57 | 1.99 | 0.89 |
| 1.05 | 1.01 | 0.95 | 1.11 | 2.21 | 1.09 | 0.89 | 1    | 0.96 | 0.99 | 0.97 |
| 1.18 | 1.36 | 1.61 | 1.26 | 0.95 | 1.09 | 0.98 | 1.22 | 3.2  | 1.18 | 0.86 |
| 0.8  | 1.05 | 1.22 | 1.01 | 3.03 | 1.48 | 0.87 | 0.83 | 1.13 | 0.91 | 0.97 |
| 0.83 | 0.81 | 0.72 | 1.89 | 0.08 | 1.23 | 1.75 | 1.43 | 1.07 | 1.61 | 1.25 |
| 0.98 | 0.94 | 1.19 | 1.1  | 1.16 | 0.71 | 1    | 1.23 | 0.87 | 1.19 | 0.95 |
| 1.07 | 1.07 | 0.96 | 1.04 | 1.09 | 1.2  | 1.14 | 1.05 | 0.95 | 0.84 | 1.13 |
| 0.99 | 1.03 | 0.8  | 0.95 | 0.98 | 1.03 | 0.97 | 0.93 | 1.12 | 1.01 | 1    |
| 0.86 | 1.08 | 0.73 | 1.05 | 0.97 | 1.19 | 1.02 | 0.83 | 0.84 | 1.1  | 1.03 |
| 0.82 | 0.95 | 1.41 | 1.5  | 0.85 | 0.6  | 0.89 | 0.87 | 1.16 | 1.03 | 0.74 |
| 1    | 0.99 | 0.53 | 0.91 | 0.8  | 0.89 | 0.88 | 0.73 | 0.84 | 0.95 | 1.13 |
| 0.98 | 0.75 | 0.53 | 0.87 | 2.32 | 3.42 | 1.23 | 0.98 | 1    | 0.85 | 0.91 |



|      |      |      |      |      |      |      |      |      |      |      |
|------|------|------|------|------|------|------|------|------|------|------|
| 1.13 | 2.37 | 1.25 | 0.97 | 1.39 | 1.18 | 1.13 | 0.8  | 1.18 | 0.86 | 0.92 |
| 1.06 | 0.91 | 0.71 | 1.01 | 0.83 | 0.6  | 1.4  | 0.88 | 0.94 | 0.79 | 1.02 |
| 1.31 | 0.98 | 1.33 | 1.07 | 1.02 | 0.87 | 0.85 | 0.94 | 0.83 | 1.08 | 1.07 |
| 0.98 | 0.59 | 1.05 | 0.66 | 0.5  | 0.76 | 0.63 | 1.28 | 0.62 | 1.73 | 0.77 |
| 1.42 | 0.9  | 1.37 | 0.91 | 2.06 | 0.86 | 1.04 | 0.9  | 0.93 | 1.13 | 1.17 |
| 1.13 | 0.78 | 1.05 | 1.05 | 5.33 | 1.52 | 1.04 | 1.28 | 0.94 | 1.08 | 1.06 |
| 0.79 | 0.76 | 0.72 | 0.91 | 0.91 | 0.99 | 0.56 | 0.96 | 0.99 | 0.66 | 0.94 |
| 1.13 | 1.12 | 0.91 | 1.11 | 1.37 | 0.78 | 0.63 | 0.79 | 0.8  | 1.25 | 1.05 |
| 0.93 | 1.12 | 2.67 | 1.21 | 1.2  | 1.31 | 0.82 | 1.3  | 3.39 | 0.71 | 0.67 |
| 1.05 | 2.52 | 1.71 | 0.85 | 1.11 | 1.02 | 1.16 | 1.27 | 0.94 | 1.1  | 0.87 |
| 0.92 | 0.76 | 1.12 | 1.08 | 0.84 | 0.53 | 0.32 | 0.79 | 0.77 | 0.87 | 1.01 |
| 0.98 | 0.84 | 1.39 | 0.89 | 0.8  | 1.07 | 0.91 | 1.05 | 0.83 | 1    | 1.09 |
| 0.92 | 0.91 | 0.62 | 1.09 | 1.48 | 0.87 | 0.83 | 0.85 | 0.76 | 0.91 | 0.97 |
| 0.87 | 0.93 | 0.82 | 1.06 | 3.11 | 0.83 | 1.11 | 0.74 | 0.96 | 0.93 | 0.71 |
| 0.98 | 0.92 | 1.42 | 1.07 | 2.14 | 0.65 | 1    | 0.94 | 0.91 | 1.25 | 1.16 |
| 1.2  | 1    | 1.04 | 1.03 | 1.35 | 1.05 | 0.9  | 0.9  | 0.67 | 1.18 | 1.7  |
| 0.82 | 1.13 | 0.95 | 1.01 | 1.4  | 1.26 | 1.47 | 1.06 | 0.74 | 0.92 | 1.07 |
| 0.85 | 1.02 | 1.11 | 0.86 | 5.3  | 0.87 | 0.7  | 0.83 | 0.84 | 0.99 | 1.62 |
| 0.77 | 0.69 | 1.09 | 0.78 | 0.68 | 0.63 | 1.06 | 0.96 | 2.21 | 0.73 | 0.6  |
| 0.48 | 0.34 | 0.32 | 0.75 | 2.07 | 2.26 | 0.4  | 1.35 | 0.76 | 1.35 | 0.99 |
| 1.05 | 0.65 | 0.93 | 0.91 | 0.98 | 0.78 | 1.07 | 0.9  | 1.33 | 0.91 | 0.85 |
| 1.65 | 1.43 | 0.77 | 1.16 | 2.58 | 0.54 | 0.6  | 0.87 | 0.68 | 1    | 0.98 |
| 2.08 | 0.95 | 1.31 | 1.3  | 2.31 | 1.52 | 0.56 | 1.07 | 0.93 | 1.07 | 0.54 |
| 0.8  | 0.63 | 0.8  | 1.56 | 1.56 | 1.1  | 0.53 | 0.67 | 0.84 | 1.19 | 0.8  |
| 0.99 | 0.95 | 0.89 | 0.78 | 0.87 | 0.9  | 1.1  | 1.02 | 1.24 | 0.8  | 1.07 |
| 0.87 | 1.1  | 0.79 | 1.23 | 1.53 | 1.09 | 1.04 | 0.99 | 1.33 | 0.83 | 0.96 |
| 0.89 | 0.85 | 1.2  | 1.46 | 1.59 | 0.7  | 1.18 | 1.29 | 0.82 | 0.9  | 1.03 |
| 1.06 | 1.76 | 0.91 | 0.81 | 0.66 | 1.12 | 0.49 | 0.81 | 1.14 | 0.88 | 1    |
| 1.01 | 1.9  | 0.84 | 1.31 | 1.43 | 1.11 | 0.7  | 1.03 | 0.75 | 0.72 | 0.53 |
| 0.81 | 1.28 | 0.39 | 0.31 | 2.53 | 0.8  | 3    | 0.49 | 1.99 | 1.02 | 0.56 |
| 0.84 | 1.38 | 1.59 | 1.08 | 0.74 | 2.67 | 0.71 | 1.01 | 1.27 | 0.98 | 1.71 |
| 0.84 | 0.99 | 2.05 | 2.36 | 0.97 | 1.77 | 1.1  | 1.15 | 0.94 | 1.64 | 1.25 |
| 1.17 | 2.79 | 1.18 | 1.9  | 5.32 | 0.47 | 1.81 | 0.95 | 1.4  | 0.81 | 1.54 |

|      |      |      |      |       |      |      |      |      |      |      |
|------|------|------|------|-------|------|------|------|------|------|------|
| 1.11 | 0.87 | 0.77 | 0.84 | 1.22  | 9.25 | 1    | 0.8  | 1.07 | 1.04 | 0.99 |
| 1.16 | 1.54 | 1.11 | 0.93 | 1.06  | 1.29 | 0.79 | 1.1  | 1.06 | 1.23 | 0.91 |
| 1.91 | 0.96 | 1.04 | 1.02 | 1.23  | 4.73 | 0.96 | 1.97 | 2.45 | 1.72 | 5.42 |
| 0.98 | 0.72 | 1.6  | 0.61 | 1.03  | 0.9  | 0.96 | 0.95 | 0.59 | 0.61 | 1.86 |
| 1.01 | 0.87 | 0.73 | 0.98 | 4.08  | 0.75 | 0.97 | 0.6  | 0.73 | 0.77 | 0.86 |
| 1.08 | 0.93 | 1.34 | 1    | 1.6   | 0.97 | 1.07 | 1.25 | 1.28 | 1.13 | 0.99 |
| 1.08 | 1.21 | 1.13 | 1.05 | 1.18  | 0.83 | 1.11 | 1    | 1.25 | 1.19 | 1.03 |
| 1.05 | 1.09 | 1.26 | 0.91 | 0.87  | 1.33 | 1.32 | 0.98 | 1.07 | 1    | 0.78 |
| 1.04 | 0.82 | 1.02 | 0.81 | 0.72  | 0.64 | 1.38 | 1.14 | 1.24 | 0.99 | 1.24 |
| 0.97 | 0.83 | 0.84 | 1.41 | 0.64  | 2.13 | 0.9  | 1.06 | 1.08 | 0.86 | 0.98 |
| 0.8  | 0.89 | 0.98 | 1.06 | 0.94  | 0.83 | 1.05 | 0.94 | 1.25 | 1.14 | 1.2  |
| 7.23 | 0.1  | 8.12 | 8.19 | 35.96 | 0.39 | 3.33 | 3.23 | 1.69 | 23.3 | 6.88 |
| 0.88 | 1.21 | 0.77 | 0.89 | 1.64  | 0.91 | 0.87 | 1.16 | 1.35 | 1.16 | 1.04 |
| 1    | 0.75 | 1.35 | 0.73 | 1.02  | 1.74 | 0.76 | 0.85 | 1.16 | 0.95 | 1.09 |

| 218902_at | 209205_s_at | 201244_s_at | 206283_s_at | 202387_at | 212248_at | 201432_at | 213342_at | 218902_at | 218902_at | 209214_s_at |
|-----------|-------------|-------------|-------------|-----------|-----------|-----------|-----------|-----------|-----------|-------------|
| 1.27      | 0.48        | 0.97        | 0.67        | 1.16      | 0.84      | 1.13      | 1.02      | 1.27      | 1.27      | 0.96        |
| 1.02      | 0.86        | 1.01        | 0.68        | 0.89      | 0.86      | 1.11      | 2.17      | 1.02      | 1.02      | 1.17        |
| 1.77      | 0.76        | 1.05        | 1.16        | 1.12      | 2.16      | 1.05      | 2.24      | 1.77      | 1.77      | 0.93        |
| 1.36      | 1.05        | 0.95        | 1.58        | 1.33      | 1.02      | 1.16      | 1.37      | 1.36      | 1.36      | 0.97        |
| 1.27      | 0.97        | 0.92        | 1.37        | 0.97      | 1.07      | 0.81      | 1.07      | 1.27      | 1.27      | 0.97        |
| 0.91      | 1.76        | 1.14        | 1.09        | 0.88      | 0.79      | 1.81      | 3.76      | 0.91      | 0.91      | 1.22        |
| 0.34      | 0.86        | 0.77        | 0.9         | 1.32      | 1.39      | 1.05      | 1.04      | 0.34      | 0.34      | 0.93        |
| 1.05      | 1.04        | 1.09        | 0.72        | 1.12      | 1.05      | 1.03      | 3.5       | 1.05      | 1.05      | 1.11        |
| 0.77      | 0.71        | 1.09        | 2.13        | 0.68      | 1.28      | 0.81      | 1.01      | 0.77      | 0.77      | 0.91        |
| 1.23      | 0.42        | 1.24        | 0.93        | 1.45      | 0.26      | 0.55      | 1.04      | 1.23      | 1.23      | 1.53        |
| 1.3       | 0.57        | 0.82        | 1.35        | 1.63      | 1.17      | 1.04      | 0.63      | 1.3       | 1.3       | 0.88        |
| 0.9       | 1.01        | 0.94        | 1.05        | 1.02      | 1.04      | 1.3       | 1.22      | 0.9       | 0.9       | 1.11        |
| 0.96      | 1.17        | 1.24        | 0.59        | 0.88      | 1.17      | 1.21      | 0.91      | 0.96      | 0.96      | 0.91        |
| 0.65      | 3.23        | 0.04        | 10.38       | 2.27      | 0         | 0.16      | 0.47      | 0.65      | 0.65      | 3.69        |
| 0.72      | 0.52        | 1.75        | 1.19        | 1.21      | 1.09      | 1.54      | 1.04      | 0.72      | 0.72      | 1.51        |
| 0.87      | 2.06        | 1.21        | 1.11        | 0.88      | 1.1       | 1.22      | 1.26      | 0.87      | 0.87      | 0.8         |
| 1.15      | 0.87        | 1.09        | 5.35        | 0.86      | 1.07      | 1.11      | 0.94      | 1.15      | 1.15      | 1.32        |
| 1.52      | 0.97        | 1.13        | 1.27        | 1.03      | 0.87      | 0.83      | 1.36      | 1.52      | 1.52      | 0.95        |
| 6.36      | 1.04        | 0.72        | 0.75        | 0.79      | 0.94      | 1         | 2.72      | 6.36      | 6.36      | 0.9         |
| 0.57      | 0.97        | 0.68        | 1.7         | 0.82      | 0.81      | 0.78      | 0.93      | 0.57      | 0.57      | 0.93        |
| 1.06      | 0.46        | 1.4         | 1.93        | 0.88      | 1.56      | 1.12      | 0.88      | 1.06      | 1.06      | 1.29        |
| 1.18      | 0.28        | 0.98        | 10.17       | 1.29      | 0.41      | 1.01      | 0.53      | 1.18      | 1.18      | 0.57        |
| 0.75      | 0.7         | 0.98        | 1.6         | 1.06      | 1.05      | 1.43      | 0.87      | 0.75      | 0.75      | 0.86        |
| 0.28      | 0.77        | 0.96        | 1.12        | 1.23      | 1.17      | 1.26      | 0.78      | 0.28      | 0.28      | 0.98        |
| 0.52      | 0.54        | 0.51        | 0.33        | 0.56      | 1.06      | 1.56      | 1.35      | 0.52      | 0.52      | 0.79        |
| 1.86      | 0.68        | 0.99        | 0.68        | 1.28      | 0.76      | 0.76      | 1.07      | 1.86      | 1.86      | 1.07        |
| 0.88      | 1.16        | 0.78        | 0.36        | 0.91      | 0.69      | 1.58      | 0.87      | 0.88      | 0.88      | 1.08        |
| 0.59      | 1.33        | 0.91        | 2           | 1.37      | 0.57      | 1.34      | 0.67      | 0.59      | 0.59      | 0.81        |
| 1.47      | 0.69        | 1.44        | 2.23        | 1.43      | 0.46      | 3.64      | 0.51      | 1.47      | 1.47      | 1.13        |
| 1.27      | 0.86        | 1.18        | 1.35        | 1.34      | 0.99      | 0.83      | 1.32      | 1.27      | 1.27      | 0.91        |

|      |      |      |      |      |       |       |      |      |      |      |
|------|------|------|------|------|-------|-------|------|------|------|------|
| 0.62 | 0.44 | 0.89 | 1.21 | 0.99 | 1.01  | 0.47  | 5.19 | 0.62 | 0.62 | 1.07 |
| 0.83 | 1.67 | 3.08 | 0.62 | 6.99 | 12.02 | 11.35 | 1.16 | 0.83 | 0.83 | 1.94 |
| 1.12 | 0.97 | 1.1  | 0.95 | 0.93 | 1.36  | 1     | 0.96 | 1.12 | 1.12 | 0.99 |
| 0.4  | 0.99 | 0.76 | 2.61 | 0.67 | 0.7   | 0.74  | 0.78 | 0.4  | 0.4  | 2.96 |
| 0.47 | 1.18 | 6.1  | 0.87 | 1.19 | 0.4   | 0.32  | 40.4 | 0.47 | 0.47 | 1.69 |
| 5.39 | 1    | 0.73 | 1.94 | 1.01 | 0.66  | 0.54  | 1.2  | 5.39 | 5.39 | 2.28 |
| 2.09 | 2.6  | 0.47 | 3.8  | 3.11 | 1.26  | 0.43  | 0.57 | 2.09 | 2.09 | 0.96 |
| 1    | 0.79 | 0.95 | 1.06 | 1.43 | 0.87  | 0.93  | 0.88 | 1    | 1    | 0.41 |
| 0.71 | 0.65 | 0.88 | 3.74 | 0.8  | 1.55  | 1.89  | 0.63 | 0.71 | 0.71 | 1.13 |
| 0.4  | 0.65 | 0.97 | 1.15 | 0.46 | 0.59  | 1.8   | 1.02 | 0.4  | 0.4  | 0.67 |
| 0.99 | 1.03 | 1.21 | 0.97 | 0.72 | 1.46  | 0.8   | 1.08 | 0.99 | 0.99 | 0.86 |
| 1.66 | 1.18 | 1.08 | 0.61 | 1.13 | 1     | 1.04  | 0.9  | 1.66 | 1.66 | 1.07 |
| 0.76 | 1.97 | 1.3  | 1.09 | 1.79 | 1.66  | 0.81  | 1.36 | 0.76 | 0.76 | 0.88 |
| 1.64 | 1.06 | 1.09 | 0.92 | 0.94 | 1     | 1.23  | 1.62 | 1.64 | 1.64 | 0.83 |
| 0.86 | 1.46 | 1.29 | 0.86 | 1.53 | 1.43  | 0.93  | 1.24 | 0.86 | 0.86 | 0.91 |
| 1.06 | 1.23 | 0.99 | 1.28 | 1.16 | 1     | 1.3   | 1.29 | 1.06 | 1.06 | 1.06 |
| 0.86 | 0.94 | 1.02 | 0.23 | 1.2  | 1.12  | 1.05  | 0.84 | 0.86 | 0.86 | 1.04 |
| 0.85 | 1.21 | 1.05 | 0.77 | 1.73 | 1.04  | 0.8   | 1.23 | 0.85 | 0.85 | 0.87 |
| 1.2  | 0.92 | 0.99 | 1.12 | 0.99 | 0.93  | 0.96  | 0.95 | 1.2  | 1.2  | 1    |
| 1.29 | 0.69 | 0.97 | 1.34 | 1.66 | 1.45  | 0.72  | 0.83 | 1.29 | 1.29 | 1.27 |
| 0.69 | 0.95 | 0.92 | 0.04 | 0.63 | 1.04  | 1.34  | 0.81 | 0.69 | 0.69 | 0.97 |
| 0.86 | 0.75 | 0.89 | 1.61 | 1.13 | 0.99  | 1.01  | 0.73 | 0.86 | 0.86 | 0.95 |
| 0.82 | 0.68 | 0.9  | 1.14 | 1    | 0.69  | 1.06  | 1.18 | 0.82 | 0.82 | 0.95 |
| 1.02 | 1.54 | 1.09 | 0.9  | 1.23 | 1.33  | 1.73  | 2.26 | 1.02 | 1.02 | 0.96 |
| 1.67 | 0.99 | 0.76 | 1.87 | 0.62 | 1.37  | 0.77  | 1.23 | 1.67 | 1.67 | 1    |
| 1.01 | 0.88 | 1.03 | 12.5 | 1.46 | 0.78  | 0.92  | 1.26 | 1.01 | 1.01 | 1.53 |
| 1.08 | 0.39 | 0.86 | 0.68 | 0.7  | 0.36  | 0.63  | 1.54 | 1.08 | 1.08 | 1.12 |
| 0.88 | 1.19 | 1.07 | 2.52 | 1.01 | 0.6   | 0.75  | 1.18 | 0.88 | 0.88 | 0.73 |
| 1.52 | 0.88 | 0.96 | 1.06 | 0.58 | 1.08  | 1.27  | 0.95 | 1.52 | 1.52 | 0.89 |
| 0.86 | 1.62 | 1.49 | 1.73 | 2.33 | 1.28  | 0.78  | 1.5  | 0.86 | 0.86 | 0.93 |
| 0.61 | 0.68 | 0.84 | 1.03 | 1.15 | 1.1   | 2.85  | 1.09 | 0.61 | 0.61 | 0.84 |
| 1.39 | 0.95 | 1.04 | 0.65 | 0.88 | 1.76  | 0.93  | 0.98 | 1.39 | 1.39 | 1.07 |
| 1.53 | 0.82 | 0.95 | 1.32 | 0.94 | 0.78  | 1.33  | 1.27 | 1.53 | 1.53 | 0.84 |

|      |      |      |       |      |       |        |       |      |      |      |
|------|------|------|-------|------|-------|--------|-------|------|------|------|
| 0.72 | 2.82 | 0.99 | 8.44  | 0.86 | 1.33  | 1.66   | 0.98  | 0.72 | 0.72 | 1.02 |
| 1.81 | 3.07 | 1.15 | 2.81  | 1.46 | 1.23  | 0.81   | 0.78  | 1.81 | 1.81 | 1.1  |
| 0.74 | 1.26 | 0.98 | 1.96  | 0.96 | 0.79  | 1.03   | 0.98  | 0.74 | 0.74 | 0.92 |
| 1.47 | 1.13 | 1.12 | 1.19  | 0.88 | 1.38  | 1.1    | 1.13  | 1.47 | 1.47 | 1.18 |
| 0.99 | 1.15 | 0.92 | 10.21 | 1.04 | 1.4   | 0.85   | 0.9   | 0.99 | 0.99 | 1.01 |
| 1.69 | 2.13 | 1.14 | 1.3   | 1.34 | 0.84  | 1.59   | 0.74  | 1.69 | 1.69 | 1.08 |
| 1.12 | 1.81 | 1.14 | 0.88  | 1.07 | 1.29  | 2.16   | 1.73  | 1.12 | 1.12 | 0.76 |
| 0.94 | 0.9  | 1.51 | 0.91  | 0.92 | 0.85  | 1.69   | 0.87  | 0.94 | 0.94 | 1.1  |
| 0.75 | 0.96 | 0.9  | 1.47  | 1.13 | 1.16  | 0.88   | 0.88  | 0.75 | 0.75 | 1.09 |
| 1.27 | 0.71 | 0.73 | 0.97  | 1.19 | 1.41  | 1.21   | 1.26  | 1.27 | 1.27 | 1.08 |
| 1.56 | 1.34 | 0.76 | 3.06  | 1.2  | 0.93  | 1.79   | 2.14  | 1.56 | 1.56 | 1.15 |
| 1.36 | 0.71 | 0.96 | 1.44  | 0.76 | 1.42  | 0.69   | 1.26  | 1.36 | 1.36 | 0.9  |
| 1.34 | 1.01 | 0.9  | 0.93  | 0.99 | 0.88  | 0.97   | 1.11  | 1.34 | 1.34 | 0.9  |
| 1.24 | 0.51 | 1.36 | 0.79  | 0.84 | 1.68  | 0.88   | 1.18  | 1.24 | 1.24 | 0.91 |
| 0.91 | 0.81 | 1.24 | 0.7   | 1.1  | 1.4   | 1.01   | 2     | 0.91 | 0.91 | 1.04 |
| 0.3  | 3.1  | 4.3  | 0.14  | 7.09 | 61.72 | 147.17 | 52.59 | 0.3  | 0.3  | 0.2  |
| 1.04 | 1.14 | 1.23 | 2.29  | 0.98 | 1.19  | 1.41   | 1.07  | 1.04 | 1.04 | 0.87 |
| 0.89 | 1.26 | 0.81 | 5     | 2.15 | 1.46  | 0.82   | 2.06  | 0.89 | 0.89 | 1.08 |
| 0.79 | 1.7  | 0.83 | 1.18  | 0.77 | 1.12  | 0.91   | 1.52  | 0.79 | 0.79 | 1.14 |
| 2.04 | 0.82 | 0.99 | 0.9   | 1.35 | 0.93  | 0.85   | 5.36  | 2.04 | 2.04 | 1.03 |
| 1.71 | 0.59 | 0.89 | 1.11  | 7.74 | 0.54  | 0.83   | 0.88  | 1.71 | 1.71 | 0.77 |
| 0.94 | 0.91 | 1.17 | 0.92  | 0.94 | 0.95  | 1.28   | 0.78  | 0.94 | 0.94 | 1.08 |
| 0.39 | 0.95 | 0.85 | 0.5   | 0.9  | 1.16  | 0.74   | 0.86  | 0.39 | 0.39 | 0.93 |
| 0.73 | 0.81 | 0.9  | 1.03  | 1.3  | 1.18  | 0.83   | 1.26  | 0.73 | 0.73 | 0.87 |
| 1.17 | 0.66 | 1.25 | 1.43  | 0.69 | 1.19  | 1.5    | 1.55  | 1.17 | 1.17 | 0.79 |
| 0.67 | 0.91 | 0.88 | 0.82  | 1    | 0.9   | 1.22   | 1.15  | 0.67 | 0.67 | 0.95 |
| 1.1  | 0.94 | 1.02 | 1.48  | 1.19 | 0.67  | 0.92   | 0.84  | 1.1  | 1.1  | 1.06 |
| 1.51 | 0.87 | 1.05 | 0.82  | 1.24 | 0.95  | 0.95   | 2.29  | 1.51 | 1.51 | 1.03 |
| 0.98 | 0.89 | 0.97 | 0.86  | 0.88 | 1.02  | 1.05   | 1.2   | 0.98 | 0.98 | 1.03 |
| 1.05 | 1.08 | 1.03 | 1.03  | 0.96 | 1.02  | 0.96   | 1.02  | 1.05 | 1.05 | 0.99 |
| 1.28 | 1.18 | 1.18 | 0.98  | 1.28 | 1.14  | 0.88   | 0.9   | 1.28 | 1.28 | 1.17 |
| 0.79 | 0.4  | 1.25 | 0.77  | 1.25 | 1.01  | 0.74   | 0.82  | 0.79 | 0.79 | 0.75 |
| 1.37 | 1.07 | 1.03 | 0.65  | 0.79 | 1.04  | 0.91   | 1.65  | 1.37 | 1.37 | 1.12 |

|      |      |      |      |      |      |      |      |      |      |      |
|------|------|------|------|------|------|------|------|------|------|------|
| 1    | 0.81 | 1.11 | 2.01 | 1.34 | 1.62 | 0.69 | 0.8  | 1    | 1    | 0.97 |
| 1.17 | 0.88 | 0.9  | 1.17 | 0.99 | 1.01 | 1.03 | 0.63 | 1.17 | 1.17 | 1.13 |
| 1.18 | 1.07 | 1.21 | 4.84 | 1.3  | 0.83 | 1.19 | 0.99 | 1.18 | 1.18 | 1.06 |
| 1.3  | 0.66 | 0.84 | 0.5  | 1.19 | 0.75 | 0.98 | 1.11 | 1.3  | 1.3  | 1.03 |
| 0.86 | 1.24 | 1.05 | 0.82 | 1.45 | 1.27 | 1.17 | 0.73 | 0.86 | 0.86 | 1.24 |
| 0.65 | 0.58 | 1.24 | 3.03 | 1.16 | 1.72 | 0.48 | 0.6  | 0.65 | 0.65 | 1.19 |
| 0.81 | 1.02 | 1.03 | 1.27 | 2.4  | 0.8  | 0.9  | 1.16 | 0.81 | 0.81 | 0.98 |
| 0.87 | 0.77 | 1.05 | 0.87 | 1.14 | 1.66 | 1.32 | 1.26 | 0.87 | 0.87 | 0.97 |
| 0.86 | 0.84 | 1.08 | 2.58 | 0.67 | 0.74 | 1.23 | 1.23 | 0.86 | 0.86 | 1.19 |
| 0.97 | 0.76 | 1.01 | 0.82 | 0.78 | 1.24 | 0.97 | 1.19 | 0.97 | 0.97 | 0.96 |
| 1.06 | 0.66 | 1.12 | 0.98 | 0.91 | 1.21 | 1.02 | 1.2  | 1.06 | 1.06 | 1.24 |
| 1.31 | 1.11 | 1.01 | 1.18 | 0.93 | 1.21 | 1.17 | 0.91 | 1.31 | 1.31 | 1.08 |
| 1.78 | 1.17 | 0.97 | 0.79 | 1.33 | 1.01 | 0.88 | 0.91 | 1.78 | 1.78 | 1.16 |
| 0.57 | 1.05 | 0.91 | 1.34 | 0.79 | 0.95 | 0.8  | 0.98 | 0.57 | 0.57 | 1.78 |
| 0.99 | 0.25 | 1.04 | 0.99 | 0.97 | 1.2  | 0.98 | 1.11 | 0.99 | 0.99 | 0.98 |
| 1.79 | 1.08 | 0.97 | 4.62 | 1.22 | 0.89 | 0.84 | 3.63 | 1.79 | 1.79 | 1.11 |
| 1.24 | 0.35 | 0.97 | 0.79 | 0.96 | 1.18 | 1.08 | 0.56 | 1.24 | 1.24 | 0.96 |
| 1.76 | 1.25 | 1.1  | 1.08 | 0.92 | 1.38 | 1.05 | 1.29 | 1.76 | 1.76 | 1.06 |
| 1.13 | 0.98 | 0.98 | 3.47 | 0.9  | 0.64 | 1.02 | 1.48 | 1.13 | 1.13 | 0.86 |
| 1.47 | 0.97 | 1.02 | 1.11 | 1.6  | 0.86 | 0.92 | 0.96 | 1.47 | 1.47 | 1.3  |
| 1.03 | 0.6  | 1.24 | 0.59 | 1.19 | 1.19 | 0.78 | 1.34 | 1.03 | 1.03 | 1.4  |
| 1.18 | 1.14 | 1.01 | 0.49 | 0.88 | 1.04 | 0.95 | 1.03 | 1.18 | 1.18 | 1.1  |
| 1.13 | 1.17 | 0.97 | 1.23 | 0.86 | 1    | 1.07 | 0.76 | 1.13 | 1.13 | 1.09 |
| 2.95 | 1.95 | 1.15 | 1.18 | 0.81 | 1.04 | 1.23 | 0.67 | 2.95 | 2.95 | 0.89 |
| 1.7  | 0.7  | 0.83 | 1.14 | 0.92 | 0.8  | 1.13 | 1.2  | 1.7  | 1.7  | 1.27 |
| 0.54 | 0.67 | 0.92 | 1.32 | 1.14 | 1.22 | 1    | 1.39 | 0.54 | 0.54 | 1.04 |
| 1.01 | 0.92 | 0.98 | 0.96 | 1.14 | 1.14 | 0.73 | 0.99 | 1.01 | 1.01 | 1.04 |
| 1.5  | 1.65 | 0.89 | 1.98 | 0.43 | 0.71 | 1.13 | 0.87 | 1.5  | 1.5  | 0.87 |
| 0.51 | 0.89 | 0.89 | 3.5  | 0.48 | 0.79 | 1.11 | 1.12 | 0.51 | 0.51 | 1.09 |
| 1.12 | 0.83 | 0.93 | 3.91 | 1.05 | 0.97 | 0.91 | 0.86 | 1.12 | 1.12 | 1.02 |
| 1.12 | 0.92 | 0.84 | 7.61 | 0.91 | 0.88 | 0.98 | 0.2  | 1.12 | 1.12 | 0.83 |
| 1.81 | 3.07 | 1.15 | 2.81 | 1.46 | 1.23 | 0.81 | 0.78 | 1.81 | 1.81 | 1.1  |
| 0.89 | 1.03 | 1.06 | 0.92 | 1.14 | 1.36 | 0.81 | 1.15 | 0.89 | 0.89 | 1.05 |

|      |      |      |      |      |      |      |      |      |      |      |
|------|------|------|------|------|------|------|------|------|------|------|
| 0.98 | 0.47 | 1.21 | 0.7  | 0.91 | 1.2  | 1.47 | 1.32 | 0.98 | 0.98 | 1    |
| 0.95 | 0.77 | 0.96 | 9.19 | 0.56 | 0.89 | 1.05 | 1.01 | 0.95 | 0.95 | 1.02 |
| 1.23 | 1.02 | 0.97 | 0.52 | 1.09 | 1.03 | 0.91 | 1.25 | 1.23 | 1.23 | 0.86 |
| 1.23 | 1.06 | 1.01 | 0.98 | 1.05 | 1.02 | 1.02 | 8.57 | 1.23 | 1.23 | 0.96 |
| 0.67 | 1.04 | 0.97 | 0.91 | 1.13 | 0.89 | 1.1  | 0.94 | 0.67 | 0.67 | 0.98 |
| 1.04 | 1.34 | 1.05 | 3    | 1.21 | 1.02 | 1.03 | 1.05 | 1.04 | 1.04 | 1.07 |
| 1.2  | 0.6  | 1.02 | 1.09 | 0.97 | 1.11 | 0.9  | 0.94 | 1.2  | 1.2  | 1.16 |
| 1.28 | 0.98 | 0.89 | 1.19 | 0.78 | 1.01 | 0.83 | 1.18 | 1.28 | 1.28 | 0.98 |
| 1.47 | 0.96 | 0.62 | 1.23 | 1.3  | 0.83 | 0.56 | 0.62 | 1.47 | 1.47 | 1.02 |
| 1.38 | 1.03 | 0.95 | 0.82 | 1.03 | 0.95 | 1.05 | 1.05 | 1.38 | 1.38 | 1.05 |
| 1.05 | 1.02 | 0.92 | 0.78 | 1.06 | 1.01 | 0.92 | 0.59 | 1.05 | 1.05 | 1.11 |
| 0.8  | 1.22 | 1.09 | 2.6  | 1.04 | 0.94 | 0.95 | 1.09 | 0.8  | 0.8  | 1.22 |
| 1.72 | 1.05 | 1.17 | 0.94 | 1.05 | 1.58 | 1.34 | 1.15 | 1.72 | 1.72 | 1.08 |
| 1.53 | 0.88 | 0.91 | 1.3  | 1.16 | 0.96 | 0.92 | 1.08 | 1.53 | 1.53 | 0.84 |
| 0.45 | 8.73 | 1.06 | 2.19 | 0.98 | 1.14 | 0.58 | 2.65 | 0.45 | 0.45 | 0.69 |
| 1.07 | 1.15 | 1.06 | 0.95 | 0.95 | 0.91 | 1.23 | 0.28 | 1.07 | 1.07 | 1.01 |
| 0.89 | 0.93 | 0.94 | 1.21 | 1.55 | 0.87 | 0.96 | 0.84 | 0.89 | 0.89 | 0.97 |
| 1.03 | 0.5  | 1.09 | 1.3  | 1.75 | 0.65 | 0.73 | 2.47 | 1.03 | 1.03 | 1.32 |
| 0.8  | 0.77 | 1.03 | 1.44 | 0.84 | 1.06 | 1.02 | 0.87 | 0.8  | 0.8  | 1.01 |
| 0.85 | 1.32 | 0.73 | 1.09 | 0.76 | 0.77 | 0.45 | 1.02 | 0.85 | 0.85 | 1.05 |
| 1.46 | 1.7  | 1.15 | 1.7  | 0.81 | 1.03 | 1.27 | 1.15 | 1.46 | 1.46 | 0.9  |
| 0.46 | 1.22 | 1.12 | 2.91 | 0.99 | 1.16 | 0.5  | 1.23 | 0.46 | 0.46 | 0.89 |
| 1.02 | 0.93 | 0.99 | 1.34 | 1.09 | 0.85 | 1.24 | 3.56 | 1.02 | 1.02 | 1.17 |
| 1.37 | 1.15 | 0.98 | 1.71 | 1.77 | 0.99 | 1.36 | 1.37 | 1.37 | 1.37 | 0.74 |
| 1.32 | 1.42 | 0.98 | 0.88 | 0.97 | 0.97 | 0.88 | 1.32 | 1.32 | 1.32 | 0.94 |
| 1.06 | 0.8  | 0.78 | 2.83 | 1.33 | 0.78 | 0.74 | 0.82 | 1.06 | 1.06 | 0.96 |
| 0.88 | 1.18 | 1.62 | 0.65 | 1.19 | 0.71 | 1.16 | 0.83 | 0.88 | 0.88 | 0.8  |
| 1.25 | 0.96 | 1.1  | 0.92 | 1.29 | 0.97 | 0.9  | 1.13 | 1.25 | 1.25 | 1.09 |
| 1.05 | 1.27 | 1.02 | 0.75 | 0.83 | 0.92 | 1.01 | 1.2  | 1.05 | 1.05 | 0.94 |
| 0.97 | 0.7  | 0.85 | 1.38 | 0.85 | 0.72 | 1.08 | 0.83 | 0.97 | 0.97 | 1.03 |
| 0.85 | 1.13 | 1.07 | 1.44 | 0.91 | 0.82 | 0.88 | 2.19 | 0.85 | 0.85 | 1.13 |
| 0.8  | 0.98 | 1.04 | 0.7  | 0.97 | 0.93 | 0.96 | 1.03 | 0.8  | 0.8  | 0.97 |
| 0.8  | 1.08 | 0.96 | 1.38 | 1.03 | 0.99 | 1.06 | 3.17 | 0.8  | 0.8  | 1.09 |

|      |      |      |       |      |      |      |      |      |      |      |
|------|------|------|-------|------|------|------|------|------|------|------|
| 0.69 | 0.67 | 0.9  | 1.28  | 1.07 | 1.07 | 1.12 | 1.31 | 0.69 | 0.69 | 1.15 |
| 0.85 | 1.09 | 1.08 | 1.56  | 0.98 | 0.96 | 0.91 | 1.12 | 0.85 | 0.85 | 1.02 |
| 0.93 | 0.98 | 1.02 | 2.36  | 1.11 | 1.21 | 0.98 | 1.04 | 0.93 | 0.93 | 1.03 |
| 1.34 | 1.03 | 1.12 | 1.73  | 0.67 | 1.05 | 1.25 | 0.5  | 1.34 | 1.34 | 0.86 |
| 0.68 | 2.34 | 0.81 | 0.38  | 1.16 | 0.65 | 0.85 | 0.75 | 0.68 | 0.68 | 0.92 |
| 1.2  | 0.99 | 0.85 | 0.92  | 0.81 | 1.01 | 0.97 | 0.95 | 1.2  | 1.2  | 1.18 |
| 0.66 | 0.45 | 0.89 | 1.46  | 0.95 | 1    | 0.43 | 4.07 | 0.66 | 0.66 | 1.02 |
| 1.4  | 0.81 | 1.09 | 23.41 | 1.1  | 1.09 | 1.08 | 0.77 | 1.4  | 1.4  | 0.98 |
| 1.18 | 1.81 | 1    | 0.95  | 1.06 | 0.87 | 0.93 | 1.62 | 1.18 | 1.18 | 0.99 |
| 0.6  | 0.46 | 0.89 | 1.64  | 1.1  | 1.03 | 0.49 | 2.85 | 0.6  | 0.6  | 1.02 |
| 1.18 | 1.07 | 1.05 | 1.4   | 0.65 | 0.77 | 1.06 | 0.93 | 1.18 | 1.18 | 1.12 |
| 0.52 | 0.75 | 1.18 | 1.76  | 1.3  | 0.62 | 0.81 | 1.27 | 0.52 | 0.52 | 1    |
| 0.84 | 0.62 | 0.84 | 0.92  | 0.88 | 0.94 | 0.84 | 0.85 | 0.84 | 0.84 | 1.05 |
| 0.93 | 0.63 | 0.94 | 0.95  | 0.97 | 0.97 | 0.99 | 4.53 | 0.93 | 0.93 | 0.88 |
| 1.12 | 0.96 | 1.1  | 1.19  | 0.94 | 0.99 | 0.94 | 3.14 | 1.12 | 1.12 | 1    |
| 0.71 | 1.02 | 1.03 | 0.67  | 0.9  | 0.88 | 1.46 | 1.18 | 0.71 | 0.71 | 1.12 |
| 1.14 | 0.89 | 1.09 | 1.32  | 1.15 | 0.87 | 0.91 | 5    | 1.14 | 1.14 | 1.06 |
| 1.17 | 0.97 | 0.94 | 2.53  | 0.83 | 0.97 | 0.91 | 1.01 | 1.17 | 1.17 | 1.04 |
| 0.93 | 0.82 | 0.71 | 1.18  | 0.58 | 1.35 | 0.76 | 1.38 | 0.93 | 0.93 | 0.96 |
| 0.8  | 1.51 | 1.14 | 1.09  | 0.78 | 1.7  | 1.16 | 1.48 | 0.8  | 0.8  | 0.99 |
| 2.1  | 1.02 | 1.06 | 3.93  | 1.25 | 0.76 | 1.01 | 0.9  | 2.1  | 2.1  | 1.44 |
| 1.09 | 0.37 | 1.23 | 1.3   | 1.34 | 0.6  | 1.34 | 0.94 | 1.09 | 1.09 | 1.2  |
| 0.89 | 0.63 | 1.08 | 0.85  | 1.02 | 0.92 | 1.08 | 1.3  | 0.89 | 0.89 | 0.89 |
| 0.98 | 1.45 | 0.91 | 1.21  | 1.01 | 1.43 | 1.07 | 1.58 | 0.98 | 0.98 | 1.21 |
| 0.87 | 1.15 | 1.03 | 1.63  | 0.94 | 1.01 | 0.93 | 1.04 | 0.87 | 0.87 | 0.97 |
| 1.75 | 3.2  | 1    | 1.19  | 1    | 1.81 | 2.26 | 0.84 | 1.75 | 1.75 | 0.82 |
| 1    | 1.03 | 1.06 | 2.07  | 1.05 | 1.09 | 0.94 | 1.39 | 1    | 1    | 1.1  |
| 1.14 | 0.95 | 0.94 | 2.17  | 1.19 | 0.97 | 1.09 | 2.72 | 1.14 | 1.14 | 0.99 |
| 0.97 | 0.85 | 1.07 | 0.94  | 1.04 | 1.08 | 0.94 | 3.84 | 0.97 | 0.97 | 1.09 |
| 1.02 | 0.9  | 0.91 | 1.01  | 1.07 | 1.23 | 1.15 | 0.97 | 1.02 | 1.02 | 0.99 |
| 0.89 | 1.14 | 1.25 | 0.67  | 3.03 | 0.99 | 1.43 | 1.14 | 0.89 | 0.89 | 0.94 |
| 0.88 | 0.94 | 0.98 | 0.31  | 0.86 | 0.96 | 0.8  | 0.9  | 0.88 | 0.88 | 0.95 |
| 1.23 | 0.74 | 1.02 | 3.33  | 2.61 | 0.91 | 0.97 | 0.66 | 1.23 | 1.23 | 0.87 |



|      |      |      |       |      |      |      |      |      |      |      |
|------|------|------|-------|------|------|------|------|------|------|------|
| 1.13 | 0.74 | 1.06 | 4.75  | 1.22 | 0.75 | 0.95 | 0.95 | 1.13 | 1.13 | 0.98 |
| 1.4  | 1.39 | 0.91 | 0.91  | 1.17 | 1.41 | 0.97 | 1.44 | 1.4  | 1.4  | 1.23 |
| 0.85 | 0.92 | 0.91 | 2.28  | 0.94 | 1.33 | 0.79 | 0.79 | 0.85 | 0.85 | 1.43 |
| 0.63 | 1.12 | 0.74 | 0.59  | 0.55 | 1.46 | 0.87 | 0.74 | 0.63 | 0.63 | 1.1  |
| 1.04 | 0.72 | 1.2  | 1.48  | 1.59 | 0.62 | 0.75 | 2.21 | 1.04 | 1.04 | 1.26 |
| 1.04 | 0.66 | 0.97 | 2.8   | 0.88 | 1.04 | 1.12 | 1.08 | 1.04 | 1.04 | 1.07 |
| 0.56 | 0.71 | 0.96 | 0.63  | 0.9  | 1.07 | 0.94 | 0.78 | 0.56 | 0.56 | 0.98 |
| 0.63 | 1.03 | 0.98 | 1.12  | 1.18 | 1.15 | 0.96 | 0.29 | 0.63 | 0.63 | 1.01 |
| 0.82 | 1.05 | 1.01 | 0.93  | 1.19 | 0.94 | 0.61 | 0.79 | 0.82 | 0.82 | 1    |
| 1.16 | 0.99 | 1.01 | 3.71  | 0.52 | 1.47 | 1.34 | 1.4  | 1.16 | 1.16 | 0.85 |
| 0.32 | 0.74 | 0.96 | 0.68  | 0.98 | 0.96 | 1.04 | 1.33 | 0.32 | 0.32 | 1.02 |
| 0.91 | 1.03 | 0.94 | 1.93  | 1.12 | 1.24 | 0.92 | 0.62 | 0.91 | 0.91 | 0.96 |
| 0.83 | 0.76 | 0.97 | 1.19  | 1.4  | 0.81 | 0.8  | 0.8  | 0.83 | 0.83 | 0.86 |
| 1.11 | 0.93 | 1.04 | 11.93 | 0.89 | 0.89 | 0.97 | 0.17 | 1.11 | 1.11 | 0.91 |
| 1    | 1.18 | 0.93 | 1.36  | 1    | 1.05 | 1.43 | 0.92 | 1    | 1    | 0.85 |
| 0.9  | 1.56 | 0.74 | 0.8   | 0.97 | 1.23 | 0.98 | 1.01 | 0.9  | 0.9  | 0.82 |
| 1.47 | 1.38 | 0.95 | 1.34  | 0.83 | 1.01 | 0.95 | 0.82 | 1.47 | 1.47 | 0.87 |
| 0.7  | 0.31 | 0.83 | 0.8   | 1.22 | 0.96 | 1    | 9.36 | 0.7  | 0.7  | 0.98 |
| 1.06 | 0.86 | 0.6  | 1.96  | 1.09 | 0.7  | 0.74 | 1.3  | 1.06 | 1.06 | 0.76 |
| 0.4  | 1.21 | 0.66 | 1.04  | 3.67 | 1.24 | 1.15 | 0.5  | 0.4  | 0.4  | 0.91 |
| 1.07 | 0.6  | 0.94 | 1.81  | 1.49 | 1.06 | 1.27 | 0.9  | 1.07 | 1.07 | 0.85 |
| 0.6  | 0.45 | 0.88 | 1.3   | 1.07 | 1.03 | 0.5  | 4.58 | 0.6  | 0.6  | 1.07 |
| 0.56 | 1.06 | 0.71 | 1.8   | 0.68 | 1.08 | 0.64 | 0.99 | 0.56 | 0.56 | 1.88 |
| 0.53 | 1.07 | 0.95 | 2.25  | 0.36 | 0.87 | 0.84 | 1.11 | 0.53 | 0.53 | 0.81 |
| 1.1  | 1.15 | 1.05 | 0.99  | 1.19 | 1.14 | 1.02 | 0.99 | 1.1  | 1.1  | 0.96 |
| 1.04 | 1.1  | 0.77 | 0.7   | 1.77 | 0.4  | 1.02 | 1.39 | 1.04 | 1.04 | 1.18 |
| 1.18 | 2.39 | 1.24 | 0.48  | 1.04 | 1.15 | 0.8  | 0.63 | 1.18 | 1.18 | 1.1  |
| 0.49 | 2    | 1.18 | 0.55  | 0.69 | 1.06 | 1.99 | 1.14 | 0.49 | 0.49 | 1.25 |
| 0.7  | 0.7  | 1.05 | 0.72  | 1.03 | 0.67 | 1.05 | 1.73 | 0.7  | 0.7  | 0.93 |
| 3    | 0.58 | 1.01 | 1.37  | 0.87 | 0.58 | 0.44 | 3.36 | 3    | 3    | 0.7  |
| 0.71 | 0.92 | 1.22 | 1.05  | 0.76 | 1.03 | 0.97 | 2.14 | 0.71 | 0.71 | 0.98 |
| 1.1  | 0.83 | 1.2  | 2.91  | 0.57 | 0.85 | 0.77 | 2.41 | 1.1  | 1.1  | 1.14 |
| 1.81 | 0.42 | 1.53 | 1.5   | 3.95 | 0.63 | 0.73 | 1.58 | 1.81 | 1.81 | 1.38 |

|      |      |      |      |      |      |      |      |      |      |      |
|------|------|------|------|------|------|------|------|------|------|------|
| 1    | 0.95 | 0.87 | 1.11 | 1.01 | 1.2  | 0.96 | 0.88 | 1    | 1    | 0.94 |
| 0.79 | 1.35 | 0.83 | 4.64 | 1.2  | 1.41 | 1.12 | 0.55 | 0.79 | 0.79 | 1.11 |
| 0.96 | 1.21 | 0.78 | 1.77 | 0.26 | 3.59 | 1.23 | 8.79 | 0.96 | 0.96 | 3.18 |
| 0.96 | 0.65 | 2    | 0.91 | 1.61 | 0.86 | 0.55 | 0.7  | 0.96 | 0.96 | 1.19 |
| 0.97 | 0.49 | 0.92 | 1.34 | 0.83 | 0.94 | 0.71 | 1.01 | 0.97 | 0.97 | 0.86 |
| 1.07 | 0.57 | 0.99 | 0.99 | 1.13 | 0.97 | 1    | 0.73 | 1.07 | 1.07 | 0.89 |
| 1.11 | 1.06 | 1.01 | 1.88 | 0.79 | 0.94 | 1    | 0.91 | 1.11 | 1.11 | 1.06 |
| 1.32 | 1.07 | 1.06 | 0.96 | 1.64 | 0.89 | 0.93 | 1.04 | 1.32 | 1.32 | 1.1  |
| 1.38 | 0.99 | 1.08 | 1.04 | 1.53 | 1.15 | 0.74 | 1.06 | 1.38 | 1.38 | 0.97 |
| 0.9  | 1.59 | 0.98 | 1.08 | 0.83 | 1.04 | 1.07 | 1.45 | 0.9  | 0.9  | 0.76 |
| 1.05 | 1.09 | 1.03 | 1.12 | 0.78 | 1.04 | 0.92 | 0.98 | 1.05 | 1.05 | 0.83 |
| 3.33 | 1.99 | 11.6 | 0.63 | 0.11 | 7.66 | 6.17 | 0.28 | 3.33 | 3.33 | 0.31 |
| 0.87 | 1.49 | 1.13 | 1.02 | 1.44 | 0.96 | 0.79 | 1.07 | 0.87 | 0.87 | 1.14 |
| 0.76 | 0.59 | 0.86 | 0.73 | 0.91 | 1.17 | 0.88 | 1.02 | 0.76 | 0.76 | 0.92 |

| 209341_s_at | 200639_s_at | 207545_s_at | 201533_at | 205192_at | 204726_at | 204372_s_at | 203497_at | 216268_s_at | 206929_s_at | 209341_s_at |
|-------------|-------------|-------------|-----------|-----------|-----------|-------------|-----------|-------------|-------------|-------------|
| 1.02        | 1           | 0.95        | 0.96      | 0.95      | 3.75      | 1.01        | 0.92      | 1.13        | 1.02        | 1.02        |
| 1.16        | 1.16        | 1.8         | 1.3       | 0.75      | 0.93      | 1.05        | 0.97      | 0.78        | 0.9         | 1.16        |
| 1.85        | 0.84        | 1.16        | 0.89      | 0.77      | 0.27      | 0.98        | 1.56      | 2.11        | 1.18        | 1.85        |
| 1.14        | 0.93        | 1.59        | 1         | 2.03      | 2.86      | 1.04        | 1.14      | 1.39        | 0.72        | 1.14        |
| 1.51        | 1.17        | 1.09        | 0.96      | 0.88      | 4.6       | 0.87        | 1.05      | 1.42        | 0.65        | 1.51        |
| 0.71        | 1           | 1.21        | 1.29      | 0.77      | 2.19      | 0.93        | 1.02      | 2.41        | 2.64        | 0.71        |
| 1.34        | 0.83        | 1.17        | 0.84      | 1.39      | 2.38      | 1.41        | 1.3       | 0.68        | 1.21        | 1.34        |
| 0.95        | 0.89        | 0.63        | 0.99      | 1.03      | 3.5       | 0.9         | 0.88      | 0.74        | 0.67        | 0.95        |
| 1           | 0.95        | 1.04        | 0.98      | 0.85      | 0.49      | 0.87        | 1.09      | 0.44        | 0.7         | 1           |
| 0.75        | 1.13        | 1.13        | 1.05      | 1.57      | 8.25      | 0.89        | 0.97      | 0.77        | 0.74        | 0.75        |
| 1.27        | 0.88        | 1           | 1.02      | 1.44      | 0.14      | 0.96        | 1.1       | 1.65        | 1.06        | 1.27        |
| 1.1         | 0.99        | 0.95        | 0.95      | 1.3       | 1.67      | 1.15        | 0.88      | 0.96        | 0.96        | 1.1         |
| 1.16        | 1.16        | 1.08        | 0.95      | 1.27      | 0.52      | 1.22        | 0.89      | 1.26        | 1.13        | 1.16        |
| 0.26        | 0.54        | 0.16        | 15.7      | 2.46      | 26.35     | 0.06        | 0.43      | 5.98        | 2.04        | 0.26        |
| 1.47        | 1.13        | 1.15        | 0.75      | 1.41      | 1.63      | 0.56        | 0.35      | 1.29        | 0.44        | 1.47        |
| 1.21        | 0.94        | 1.26        | 1.18      | 1.26      | 0.76      | 0.86        | 0.83      | 0.52        | 0.57        | 1.21        |
| 1.25        | 1.14        | 1.33        | 0.95      | 1.37      | 0.67      | 1.12        | 0.89      | 0.71        | 1.14        | 1.25        |
| 1.05        | 1.12        | 1.06        | 1.15      | 0.85      | 1.63      | 1.04        | 1.23      | 0.81        | 1.2         | 1.05        |
| 1.32        | 0.89        | 1.38        | 1.15      | 0.31      | 1.75      | 0.85        | 0.95      | 7.3         | 0.79        | 1.32        |
| 1.39        | 1.01        | 2.17        | 0.68      | 0.2       | 5.45      | 0.61        | 1         | 1.45        | 0.68        | 1.39        |
| 0.49        | 1.01        | 0.4         | 3.6       | 1.11      | 2.67      | 0.94        | 0.91      | 0.48        | 1.55        | 0.49        |
| 0.93        | 0.82        | 0.58        | 0.82      | 2.13      | 27.12     | 0.78        | 0.46      | 1.13        | 1.04        | 0.93        |
| 1.07        | 0.96        | 0.74        | 1         | 0.9       | 1.11      | 0.91        | 0.82      | 0.98        | 0.81        | 1.07        |
| 1.21        | 0.9         | 1.97        | 0.64      | 1.55      | 0.5       | 1.06        | 0.98      | 0.72        | 1.27        | 1.21        |
| 1.79        | 1.43        | 1.15        | 0.74      | 5.08      | 19.52     | 0.55        | 0.59      | 0.03        | 0.81        | 1.79        |
| 0.85        | 0.74        | 1.39        | 1.03      | 1.79      | 2.2       | 1.23        | 0.72      | 1.32        | 1.53        | 0.85        |
| 1.14        | 1.16        | 0.39        | 0.85      | 1.07      | 1.88      | 1.02        | 0.86      | 0.28        | 1.33        | 1.14        |
| 0.97        | 1.78        | 1.18        | 0.38      | 1.17      | 0.57      | 0.71        | 0.7       | 0.43        | 0.7         | 0.97        |
| 0.5         | 0.75        | 0.77        | 1         | 1.57      | 0.27      | 1.34        | 1         | 3.37        | 0.91        | 0.5         |
| 0.83        | 0.92        | 0.98        | 1.06      | 1.12      | 0.75      | 0.95        | 1.09      | 2.11        | 1.01        | 0.83        |

|      |      |      |      |      |      |      |      |        |      |      |
|------|------|------|------|------|------|------|------|--------|------|------|
| 0.69 | 1.09 | 0.71 | 0.98 | 0.88 | 1.22 | 1.13 | 1.18 | 1.49   | 1.09 | 0.69 |
| 3.19 | 3.68 | 1.15 | 1.31 | 1.48 | 8.17 | 7.18 | 0.94 | 0.09   | 2.75 | 3.19 |
| 1.26 | 0.98 | 0.99 | 1.12 | 1.35 | 2.83 | 1.01 | 1.29 | 1.32   | 1.02 | 1.26 |
| 0.76 | 0.64 | 0.6  | 1.14 | 0.39 | 0.48 | 1.1  | 0.59 | 0.53   | 0.92 | 0.76 |
| 2.42 | 0.96 | 3.2  | 2.17 | 1.15 | 0.93 | 0.07 | 6.02 | 5      | 0.96 | 2.42 |
| 0.78 | 0.8  | 1.23 | 1.14 | 0.76 | 1.05 | 1.45 | 0.69 | 1      | 4.58 | 0.78 |
| 0.93 | 1.16 | 0.46 | 0.97 | 1.31 | 0.02 | 0.81 | 0.76 | 0.86   | 0.44 | 0.93 |
| 0.78 | 1.12 | 0.83 | 1.03 | 0.89 | 0.97 | 0.95 | 0.89 | 1.14   | 0.67 | 0.78 |
| 0.89 | 1.02 | 0.93 | 1.13 | 1.21 | 0.74 | 0.91 | 0.99 | 1.33   | 0.56 | 0.89 |
| 1.88 | 1.08 | 1.25 | 0.91 | 1.43 | 1.5  | 0.83 | 1.36 | 3.11   | 1.12 | 1.88 |
| 1.12 | 1.12 | 0.96 | 0.9  | 1.04 | 3.5  | 1.08 | 1.1  | 0.6    | 1.3  | 1.12 |
| 0.95 | 1.07 | 0.87 | 0.97 | 0.88 | 0.56 | 0.98 | 0.98 | 0.67   | 1.07 | 0.95 |
| 1.41 | 0.92 | 4.99 | 1.06 | 0.59 | 1.32 | 0.48 | 0.87 | 0.91   | 0.4  | 1.41 |
| 1.49 | 1.17 | 1.75 | 1.04 | 1.42 | 1.41 | 0.68 | 0.92 | 3.44   | 0.21 | 1.49 |
| 1.22 | 0.91 | 3.31 | 1.13 | 0.76 | 1.26 | 0.48 | 0.89 | 1.03   | 0.45 | 1.22 |
| 1.59 | 1.37 | 1.58 | 1.28 | 0.95 | 2.57 | 0.97 | 1.19 | 1.32   | 1.2  | 1.59 |
| 1.14 | 0.94 | 1.28 | 0.94 | 1.81 | 0    | 1.02 | 0.93 | 1.07   | 0.92 | 1.14 |
| 1.1  | 0.97 | 1.09 | 1    | 1.47 | 3.11 | 1.09 | 0.99 | 0.86   | 1.05 | 1.1  |
| 1.06 | 0.94 | 1.04 | 0.95 | 1.03 | 4.5  | 1.01 | 1.01 | 1.07   | 1.06 | 1.06 |
| 0.89 | 1.02 | 2.14 | 0.83 | 0.81 | 1.33 | 1.42 | 1    | 0.53   | 1.45 | 0.89 |
| 0.81 | 1.07 | 0.92 | 0.93 | 1.45 | 1    | 1.1  | 0.9  | 0.57   | 1.05 | 0.81 |
| 1.06 | 0.83 | 0.75 | 0.94 | 1.53 | 0.75 | 1.02 | 1.08 | 0.86   | 1.09 | 1.06 |
| 0.7  | 0.99 | 1.07 | 1.08 | 1.04 | 6.34 | 1.11 | 0.98 | 0.83   | 0.66 | 0.7  |
| 1.13 | 1.19 | 1.05 | 0.93 | 1.11 | 0.75 | 1.04 | 1.05 | 1.2    | 1.43 | 1.13 |
| 0.66 | 1.06 | 1.93 | 1.03 | 0.52 | 1.42 | 0.99 | 1.44 | 1.84   | 0.69 | 0.66 |
| 1.16 | 0.55 | 0.58 | 1.16 | 1.15 | 0.59 | 1.42 | 1.03 | 0.82   | 1.21 | 1.16 |
| 1.15 | 0.76 | 2.69 | 0.71 | 1.04 | 1.56 | 0.93 | 0.79 | 4.86   | 1.07 | 1.15 |
| 2.16 | 0.56 | 0.85 | 0.59 | 1.38 | Inf  | 1.42 | 1.75 | 5.96   | 2.39 | 2.16 |
| 1.43 | 1.02 | 1.08 | 1.08 | 1.09 | 1    | 0.91 | 0.91 | 0.94   | 0.81 | 1.43 |
| 1.22 | 0.82 | 4.6  | 1.13 | 0.87 | 1.07 | 0.52 | 0.98 | 0.69   | 0.32 | 1.22 |
| 0.92 | 1.22 | 1.07 | 1.28 | 0.68 | 5.55 | 1.04 | 0.96 | 1.2    | 1.81 | 0.92 |
| 1.61 | 0.88 | 0.91 | 1.62 | 1.54 | 24   | 1.07 | 1.17 | 1.93   | 1.52 | 1.61 |
| 1.02 | 0.89 | 0.94 | 1.03 | 1.3  | 1.87 | 0.91 | 0.86 | 103.29 | 0.89 | 1.02 |

|      |       |      |      |      |       |       |      |      |       |      |
|------|-------|------|------|------|-------|-------|------|------|-------|------|
| 1.04 | 1.35  | 1.2  | 0.93 | 0.58 | 0.62  | 1.14  | 1.01 | 0.6  | 1.27  | 1.04 |
| 0.99 | 1.05  | 0.98 | 1.4  | 1.02 | 1.51  | 1.25  | 1.17 | 3.07 | 0.96  | 0.99 |
| 1    | 1.13  | 1.02 | 1.01 | 1.07 | 0.79  | 1.12  | 0.86 | 0.98 | 1.03  | 1    |
| 0.88 | 1.05  | 1.34 | 1.3  | 1.48 | 10.47 | 1.24  | 1.05 | 1.56 | 1.18  | 0.88 |
| 1.21 | 0.84  | 1.11 | 1.03 | 0.98 | 1.32  | 1.01  | 1.4  | 1.2  | 1.02  | 1.21 |
| 1.65 | 0.83  | 1.7  | 0.95 | 0.39 | 4.69  | 0.95  | 0.96 | 1.28 | 1.1   | 1.65 |
| 0.6  | 1.04  | 0.95 | 1.59 | 1.36 | 1.28  | 1.28  | 1.55 | 0.26 | 0.62  | 0.6  |
| 1.26 | 0.95  | 0.9  | 1.07 | 1.14 | 0.93  | 0.99  | 0.85 | 0.89 | 1.59  | 1.26 |
| 6.85 | 0.96  | 1.05 | 0.99 | 0.46 | 3.01  | 1.07  | 0.52 | 1.72 | 0.17  | 6.85 |
| 1.61 | 1.12  | 1.37 | 1.26 | 0.89 | 1.75  | 1.13  | 1.49 | 4.02 | 0.84  | 1.61 |
| 0.5  | 1.1   | 0.91 | 0.76 | 1.06 | 2.48  | 1.36  | 0.76 | 0.89 | 1.86  | 0.5  |
| 1.07 | 1.06  | 1.1  | 0.68 | 1.9  | 2     | 1.02  | 1.14 | 3.04 | 1.14  | 1.07 |
| 1.35 | 1.05  | 0.98 | 1.2  | 1.3  | 0.6   | 0.79  | 1.03 | 1.09 | 1.09  | 1.35 |
| 0.99 | 1     | 2.07 | 1.41 | 0.68 | 2.62  | 1     | 1.39 | 2.64 | 1.3   | 0.99 |
| 0.87 | 0.91  | 0.75 | 1.17 | 1.44 | 0.33  | 1.06  | 1.11 | 1.13 | 0.97  | 0.87 |
| 9.99 | 36.43 | 1.17 | 0.33 | 0.71 | 1.28  | 46.84 | 4.95 | 3.08 | 0.58  | 9.99 |
| 1.44 | 1.11  | 1.33 | 0.81 | 0.99 | 3.37  | 1.04  | 1.05 | 0.73 | 0.83  | 1.44 |
| 1.29 | 1.25  | 0.88 | 3.21 | 0.42 | 0.31  | 1.64  | 0.73 | 3.8  | 0.48  | 1.29 |
| 1.21 | 1.32  | 1.89 | 1.19 | 1.29 | 1.76  | 1.36  | 1.03 | 1.16 | 1.38  | 1.21 |
| 1.04 | 0.91  | 1.16 | 1.26 | 2.58 | 2.75  | 2.04  | 1.89 | 0.75 | 12.44 | 1.04 |
| 1.25 | 1.45  | 1.96 | 2.81 | 0.79 | 2.25  | 2.09  | 0.84 | 1.25 | 3.37  | 1.25 |
| 1.2  | 1.11  | 0.72 | 0.83 | 1.77 | 1.07  | 0.95  | 0.97 | 1.22 | 0.83  | 1.2  |
| 0.93 | 1.08  | 1.12 | 1.04 | 1.21 | 1.56  | 1.09  | 1.16 | 0.72 | 1.09  | 0.93 |
| 0.8  | 1.06  | 0.69 | 1    | 0.75 | 0.97  | 1.23  | 0.71 | 0.82 | 1.44  | 0.8  |
| 1.17 | 1.05  | 1.06 | 1.01 | 0.95 | 1.27  | 0.91  | 0.87 | 0.8  | 0.99  | 1.17 |
| 0.9  | 0.99  | 0.92 | 0.91 | 1.4  | 0.5   | 0.68  | 0.79 | 0.69 | 0.93  | 0.9  |
| 0.99 | 0.84  | 0.78 | 1    | 1.23 | NA    | 1.02  | 0.84 | 0.93 | 1.05  | 0.99 |
| 1    | 0.97  | 1.12 | 1.12 | 0.95 | 8.53  | 1.01  | 1    | 0.86 | 1.19  | 1    |
| 0.79 | 1.08  | 1.29 | 1.09 | 0.76 | 7.12  | 1.12  | 1.04 | 1.54 | 0.96  | 0.79 |
| 0.89 | 0.96  | 0.94 | 0.84 | 1.47 | 2.11  | 1.1   | 1.08 | 0.85 | 0.81  | 0.89 |
| 1.07 | 0.97  | 1.23 | 1.01 | 1.09 | 2.22  | 1.04  | 1.12 | 1.29 | 0.96  | 1.07 |
| 0.73 | 1.14  | 0.74 | 0.99 | 1.01 | 1.45  | 0.6   | 0.86 | 0.46 | 0.81  | 0.73 |
| 1.39 | 1.15  | 1.64 | 1.23 | 1.01 | 2.25  | 1.01  | 1.14 | 4.81 | 1.53  | 1.39 |

|      |      |      |      |      |      |      |      |      |      |      |
|------|------|------|------|------|------|------|------|------|------|------|
| 1.31 | 1.08 | 0.71 | 0.95 | 0.7  | 1.6  | 1.1  | 1.43 | 0.79 | 0.8  | 1.31 |
| 0.83 | 1.05 | 1.03 | 0.94 | 0.99 | 0.85 | 1.01 | 0.96 | 1.02 | 0.76 | 0.83 |
| 0.75 | 0.58 | 0.72 | 0.65 | 0.77 | 0.88 | 1.17 | 1.03 | 0.73 | 1.3  | 0.75 |
| 4.71 | 0.83 | 0.93 | 0.7  | 0.73 | 3.25 | 1.61 | 0.7  | 1.42 | 0.81 | 4.71 |
| 1.72 | 1.56 | 1.4  | 1.18 | 1.84 | 0.81 | 0.87 | 0.99 | 1.41 | 1    | 1.72 |
| 0.5  | 1.07 | 0.16 | 0.68 | 1.65 | 4.42 | 0.69 | 0.34 | 0.43 | 4.74 | 0.5  |
| 1.47 | 0.97 | 1.25 | 0.84 | 2.22 | 1.23 | 0.79 | 1.15 | 1.12 | 0.91 | 1.47 |
| 0.94 | 1.07 | 1.33 | 1.08 | 0.69 | 5.42 | 1.23 | 0.67 | 0.69 | 1.04 | 0.94 |
| 0.57 | 0.99 | 0.84 | 0.85 | 1.72 | 2.52 | 0.9  | 0.9  | 4.05 | 0.76 | 0.57 |
| 1.01 | 1.3  | 1.38 | 0.98 | 1.38 | 4.38 | 1.22 | 0.81 | 0.71 | 1.35 | 1.01 |
| 0.91 | 1.03 | 1.05 | 1.05 | 1.43 | 3.99 | 1.08 | 1.08 | 0.91 | 1.32 | 0.91 |
| 1.14 | 0.95 | 0.9  | 1.05 | 1.4  | 3.61 | 0.98 | 0.95 | 0.76 | 0.93 | 1.14 |
| 0.73 | 1.17 | 0.87 | 0.87 | 0.55 | 0.96 | 1.14 | 1.17 | 2.05 | 0.88 | 0.73 |
| 0.87 | 0.81 | 0.91 | 1.4  | 0.7  | 0.69 | 1.08 | 0.83 | 0.87 | 1.1  | 0.87 |
| 1.26 | 1.28 | 1.26 | 1.31 | 1.3  | 1.58 | 1.08 | 1.12 | 2.8  | 1.06 | 1.26 |
| 1.24 | 1    | 1.09 | 1.68 | 3.06 | 2.33 | 1.06 | 1.12 | 0.69 | 0.85 | 1.24 |
| 0.92 | 0.99 | 0.89 | 0.89 | 1.59 | 0.3  | 1    | 0.99 | 4.69 | 0.12 | 0.92 |
| 1.19 | 1.09 | 1.22 | 1.13 | 1.18 | 9.16 | 1.25 | 1.09 | 1.66 | 1.16 | 1.19 |
| 1.2  | 0.86 | 0.87 | 0.98 | 1.31 | 1.3  | 0.94 | 0.83 | 0.69 | 0.57 | 1.2  |
| 0.7  | 1.03 | 1.77 | 1.12 | 0.87 | 1    | 1.11 | 1.04 | 0.99 | 0.57 | 0.7  |
| 0.98 | 1.07 | 1.79 | 1.37 | 0.7  | 1.77 | 1.37 | 1.66 | 1.34 | 0.95 | 0.98 |
| 0.71 | 0.94 | 0.88 | 1    | 1.32 | 3.49 | 0.97 | 1.06 | 1.46 | 0.79 | 0.71 |
| 1.1  | 0.97 | 1.2  | 1.38 | 0.97 | 1.19 | 1.18 | 1.15 | 0.74 | 0.86 | 1.1  |
| 1.86 | 0.85 | 1.47 | 1.37 | 1.73 | 3.12 | 1.81 | 2.16 | 0.4  | 1.36 | 1.86 |
| 0.88 | 1.23 | 0.5  | 0.9  | 0.93 | 4.27 | 0.94 | 0.68 | 1.02 | 2.27 | 0.88 |
| 1.08 | 1.19 | 1.46 | 0.9  | 0.85 | 3.25 | 0.83 | 0.86 | 1.12 | 0.49 | 1.08 |
| 1.29 | 0.93 | 0.97 | 1.09 | 0.96 | 0.17 | 1.02 | 0.93 | 2.32 | 0.92 | 1.29 |
| 1.33 | 0.67 | 1.11 | 0.95 | 0.76 | 1.46 | 0.85 | 1.04 | 2.3  | 1.17 | 1.33 |
| 0.79 | 0.87 | 0.97 | 1.03 | 1.2  | 0.73 | 1.45 | 0.66 | 0.49 | 0.96 | 0.79 |
| 0.82 | 1.01 | 1.22 | 1.2  | 0.82 | 0.93 | 1.09 | 0.94 | 2.58 | 1.03 | 0.82 |
| 0.84 | 1.05 | 1    | 0.77 | 1.08 | 2.75 | 1    | 0.98 | 3.81 | 0.8  | 0.84 |
| 0.99 | 1.05 | 0.98 | 1.4  | 1.02 | 1.51 | 1.25 | 1.17 | 3.07 | 0.96 | 0.99 |
| 1.09 | 0.89 | 1.55 | 0.99 | 0.8  | 2    | 0.94 | 1.11 | 1.25 | 0.85 | 1.09 |

|      |      |      |      |      |      |      |      |      |      |      |
|------|------|------|------|------|------|------|------|------|------|------|
| 0.89 | 1.09 | 1.05 | 1.05 | 1.27 | 0.25 | 0.96 | 0.92 | 0.51 | 0.78 | 0.89 |
| 0.82 | 0.77 | 1.09 | 1.05 | 1.81 | 3.37 | 0.86 | 1.18 | 1.02 | 1.22 | 0.82 |
| 1.09 | 0.72 | 1.09 | 1.08 | 2.55 | 1.08 | 0.86 | 0.93 | 0.94 | 1.08 | 1.09 |
| 0.91 | 1.1  | 0.89 | 0.85 | 1.08 | 2.92 | 0.88 | 1.14 | 0.99 | 0.79 | 0.91 |
| 0.98 | 0.92 | 0.72 | 0.83 | 1.74 | 1.08 | 0.89 | 0.9  | 1.37 | 1.06 | 0.98 |
| 0.9  | 0.87 | 0.91 | 0.89 | 0.93 | 1.15 | 1.08 | 0.94 | 0.95 | 1.16 | 0.9  |
| 1    | 0.85 | 1.13 | 1.07 | 1.09 | 1.11 | 1.04 | 1.07 | 0.93 | 0.87 | 1    |
| 0.92 | 1.24 | 1.5  | 0.76 | 1.4  | 1.58 | 1.92 | 1.05 | 1.06 | 0.72 | 0.92 |
| 1.23 | 0.84 | 1.57 | 0.77 | 0.96 | 0.87 | 1.24 | 1.27 | 0.38 | 1.06 | 1.23 |
| 1.06 | 1.38 | 1.08 | 1.24 | 1.12 | 0.25 | 1.38 | 0.95 | 1.88 | 0.99 | 1.06 |
| 1.14 | 1.03 | 1    | 1.01 | 0.66 | 0.53 | 1.05 | 0.94 | 0.3  | 0.94 | 1.14 |
| 1.06 | 1.17 | 0.85 | 1.11 | 0.73 | 0.71 | 0.99 | 1.12 | 1.37 | 1.17 | 1.06 |
| 1.07 | 1.01 | 1.23 | 1.14 | 1.02 | 8.5  | 1.19 | 1    | 1.63 | 1.24 | 1.07 |
| 1.09 | 0.71 | 1.32 | 0.89 | 1.18 | 3.33 | 0.81 | 0.99 | 0.86 | 0.96 | 1.09 |
| 1.38 | 1.33 | 1.51 | 2.37 | 0.44 | 1.56 | 1.52 | 0.77 | 2.11 | 1.21 | 1.38 |
| 1.1  | 1.22 | 1.3  | 0.89 | 1.01 | 1.62 | 1.03 | 0.91 | 0.88 | 1.27 | 1.1  |
| 0.91 | 0.89 | 1.27 | 1.14 | 1.81 | 1.36 | 0.95 | 0.97 | 0.98 | 1.06 | 0.91 |
| 0.9  | 1.12 | 0.75 | 0.86 | 0.97 | 1.8  | 1.36 | 1.29 | 2.5  | 1.45 | 0.9  |
| 0.96 | 1.24 | 0.93 | 0.94 | 1.15 | 5.33 | 1.02 | 0.93 | 0.68 | 1.05 | 0.96 |
| 0.84 | 0.9  | 0.87 | 1    | 0.96 | 2.56 | 0.96 | 0.69 | 0.78 | 0.82 | 0.84 |
| 1.04 | 1.03 | 0.93 | 1.17 | 1.34 | 6    | 1    | 1.37 | 0.95 | 1.13 | 1.04 |
| 1.21 | 1.38 | 0.97 | 0.89 | 0.95 | 0.12 | 1.31 | 0.91 | 1.29 | 0.58 | 1.21 |
| 1.06 | 1.02 | 1.11 | 0.97 | 1.02 | 4.8  | 0.99 | 1.18 | 1.15 | 0.94 | 1.06 |
| 0.94 | 0.76 | 0.91 | 1.38 | 1.05 | 0.69 | 0.85 | 1    | 1.01 | 0.98 | 0.94 |
| 1.38 | 1.14 | 0.72 | 0.91 | 0.91 | 0.98 | 0.73 | 0.82 | 0.68 | 0.82 | 1.38 |
| 1.15 | 0.61 | 0.97 | 1.05 | 1.78 | 0.88 | 1.14 | 1.07 | 0.71 | 1.38 | 1.15 |
| 1.29 | 1.15 | 1.32 | 0.78 | 0.72 | 0.53 | 1.24 | 1.29 | 0.59 | 0.46 | 1.29 |
| 0.82 | 1.09 | 1.13 | 1.04 | 0.95 | 0.61 | 0.88 | 1.29 | 0.87 | 1.09 | 0.82 |
| 1.07 | 0.94 | 1.23 | 1.04 | 1.24 | Inf  | 0.97 | 1    | 0.97 | 1.09 | 1.07 |
| 1.19 | 1.06 | 1.11 | 0.95 | 1.08 | 0    | 0.88 | 1.08 | 0.88 | 0.81 | 1.19 |
| 0.81 | 0.98 | 1.17 | 1.01 | 0.96 | 6.8  | 1.31 | 1.34 | 0.75 | 1.05 | 0.81 |
| 1.01 | 1.05 | 1.02 | 0.97 | 1.44 | 1.19 | 1.03 | 0.91 | 1.07 | 1.01 | 1.01 |
| 1.1  | 1.05 | 1.09 | 0.97 | 1.07 | 1.07 | 1.03 | 0.93 | 0.87 | 0.91 | 1.1  |

|      |      |      |      |      |      |      |      |       |      |      |
|------|------|------|------|------|------|------|------|-------|------|------|
| 6.69 | 1.05 | 0.49 | 1.19 | 0.92 | 0.48 | 1.47 | 0.48 | 1.73  | 0.56 | 6.69 |
| 0.82 | 1.05 | 1.08 | 0.91 | 0.9  | 2.86 | 1.13 | 1.17 | 1.33  | 1    | 0.82 |
| 1.01 | 0.92 | 0.98 | 0.92 | 1.08 | 0.88 | 1.09 | 1.01 | 0.84  | 0.94 | 1.01 |
| 1.19 | 1.48 | 1.52 | 1.3  | 0.91 | 2.85 | 0.86 | 1.07 | 0.92  | 0.64 | 1.19 |
| 0.51 | 0.89 | 0.42 | 0.82 | 0.85 | 6.83 | 1.02 | 0.99 | 0.68  | 0.77 | 0.51 |
| 0.99 | 0.95 | 0.99 | 1.18 | 0.97 | 1.19 | 0.99 | 0.95 | 1.07  | 0.98 | 0.99 |
| 0.7  | 1.02 | 0.67 | 0.97 | 0.76 | 0.89 | 1.1  | 1.16 | 1.44  | 1.05 | 0.7  |
| 0.93 | 0.87 | 0.72 | 0.94 | 1.34 | 1.17 | 0.94 | 1.02 | 0.74  | 0.86 | 0.93 |
| 0.94 | 1.15 | 0.89 | 1.2  | 1.28 | 0.67 | 1.11 | 1.06 | 1.04  | 0.96 | 0.94 |
| 0.68 | 1.11 | 0.57 | 1.12 | 0.68 | 3.56 | 1.18 | 1.32 | 1.22  | 1.22 | 0.68 |
| 0.73 | 1.06 | 0.84 | 1.01 | 0.84 | 2.5  | 1.34 | 1.05 | 1.61  | 1.07 | 0.73 |
| 0.83 | 1.27 | 2    | 1.1  | 0.9  | 2.07 | 1.75 | 1.28 | 0.52  | 0.76 | 0.83 |
| 0.92 | 0.98 | 0.78 | 0.96 | 1.05 | Inf  | 0.92 | 0.96 | 1.54  | 0.83 | 0.92 |
| 0.91 | 1.01 | 0.98 | 0.92 | 1.08 | 2.83 | 0.93 | 0.87 | 0.44  | 1.18 | 0.91 |
| 0.92 | 0.9  | 0.99 | 0.82 | 0.94 | 1.11 | 0.92 | 1.15 | 0.95  | 0.84 | 0.92 |
| 1.06 | 0.94 | 0.87 | 1.16 | 0.81 | 1.37 | 0.93 | 0.92 | 0.87  | 3.77 | 1.06 |
| 1.19 | 1.07 | 1.04 | 0.87 | 1.17 | 2.55 | 0.96 | 0.98 | 1.4   | 1.26 | 1.19 |
| 0.78 | 0.95 | 0.95 | 0.98 | 0.81 | 2.64 | 0.95 | 0.99 | 0.98  | 0.88 | 0.78 |
| 1.21 | 0.8  | 0.86 | 0.99 | 0.84 | 1.71 | 0.92 | 1.11 | 1.34  | 0.61 | 1.21 |
| 1.12 | 0.82 | 0.94 | 0.96 | 0.55 | 1.36 | 0.73 | 1.13 | 1.25  | 0.84 | 1.12 |
| 1    | 1.12 | 1.02 | 1.32 | 1.11 | 7.67 | 1.26 | 0.88 | 0.97  | 1.11 | 1    |
| 0.57 | 0.71 | 0.5  | 2.54 | 1.71 | 0.13 | 0.8  | 0.82 | 4.82  | 0.73 | 0.57 |
| 0.96 | 0.95 | 1.06 | 0.87 | 1.43 | 0.92 | 0.93 | 1    | 0.81  | 0.7  | 0.96 |
| 3.2  | 0.87 | 0.63 | 0.98 | 0.62 | 1.08 | 1.1  | 0.66 | 1.98  | 0.41 | 3.2  |
| 1.13 | 0.95 | 0.92 | 1.07 | 0.81 | 1.12 | 0.8  | 0.88 | 1     | 0.83 | 1.13 |
| 1.07 | 0.86 | 0.77 | 0.47 | 0.94 | 1.83 | 0.9  | 1.17 | 63.43 | 1.25 | 1.07 |
| 0.87 | 1.1  | 1.38 | 1.03 | 0.97 | 1    | 1.08 | 1.28 | 1.24  | 0.96 | 0.87 |
| 0.95 | 1.07 | 0.9  | 0.95 | 1.1  | 2.65 | 1    | 0.95 | 1.16  | 0.75 | 0.95 |
| 1.12 | 0.93 | 1.08 | 0.99 | 1.09 | Inf  | 1.12 | 1.05 | 0.84  | 1.48 | 1.12 |
| 0.84 | 1.05 | 0.79 | 1.06 | 1.06 | 0.35 | 0.96 | 1.05 | 3.7   | 1.2  | 0.84 |
| 1.16 | 0.75 | 1.23 | 0.82 | 1.6  | 0.71 | 0.88 | 0.86 | 0.77  | 0.91 | 1.16 |
| 0.84 | 1.08 | 0.76 | 0.99 | 0.99 | 1    | 1.01 | 0.89 | 1.09  | 0.84 | 0.84 |
| 1    | 0.93 | 0.67 | 1.05 | 1.6  | 0.88 | 1.01 | 1.32 | 0.53  | 0.94 | 1    |



|      |      |      |      |      |      |      |      |      |      |      |
|------|------|------|------|------|------|------|------|------|------|------|
| 1.18 | 0.99 | 1.53 | 1.07 | 1.27 | 3.5  | 1.08 | 0.94 | 1.45 | 0.98 | 1.18 |
| 0.94 | 0.81 | 0.97 | 1.02 | 0.87 | 0.5  | 0.93 | 1.51 | 0.8  | 1.24 | 0.94 |
| 0.83 | 1.25 | 0.94 | 0.94 | 0.9  | 0.8  | 1.06 | 1.07 | 1.2  | 0.76 | 0.83 |
| 0.62 | 0.85 | 0.77 | 1.55 | 0.75 | 1.12 | 0.86 | 1.65 | 1.12 | 0.64 | 0.62 |
| 0.93 | 0.91 | 0.9  | 1    | 1.14 | 1.91 | 1.14 | 1.14 | 1.1  | 1.33 | 0.93 |
| 0.94 | 0.99 | 1.07 | 1.08 | 0.74 | 0.7  | 1.01 | 0.97 | 0.89 | 0.77 | 0.94 |
| 0.99 | 1.27 | 1.41 | 1.52 | 1.22 | 1.8  | 0.7  | 0.56 | 0.56 | 0.59 | 0.99 |
| 0.8  | 0.99 | 1.28 | 1.05 | 1.04 | 2.85 | 0.99 | 1.08 | 0.26 | 0.56 | 0.8  |
| 3.39 | 1.06 | 0.47 | 0.9  | 0.77 | 0.46 | 0.97 | 0.55 | 1.04 | 0.68 | 3.39 |
| 0.94 | 1.29 | 1.49 | 1.13 | 0.88 | 1.34 | 0.73 | 1.09 | 0.57 | 0.75 | 0.94 |
| 0.77 | 1.03 | 1.07 | 0.99 | 0.58 | 1    | 0.84 | 0.92 | 0.92 | 0.84 | 0.77 |
| 0.83 | 1.05 | 1.26 | 0.99 | 1.12 | 2    | 1.01 | 1.11 | 0.67 | 0.85 | 0.83 |
| 0.76 | 1.16 | 0.84 | 1.15 | 1.46 | 2    | 1.2  | 0.9  | 1.07 | 0.9  | 0.76 |
| 0.96 | 1.06 | 1.34 | 0.8  | 0.93 | 1.58 | 1.03 | 0.92 | 2.08 | 0.94 | 0.96 |
| 0.91 | 1.08 | 1.03 | 1.23 | 0.72 | 9.69 | 0.8  | 0.79 | 1.1  | 0.89 | 0.91 |
| 0.67 | 0.83 | 0.63 | 0.96 | 0.75 | 0.42 | 1.01 | 1.17 | 2.29 | 0.91 | 0.67 |
| 0.74 | 1.06 | 0.95 | 0.96 | 1.24 | 0.46 | 1.34 | 1.04 | 1.26 | 0.95 | 0.74 |
| 0.84 | 0.97 | 0.93 | 1.07 | 0.84 | 3.7  | 0.95 | 0.9  | 0.52 | 1.15 | 0.84 |
| 2.21 | 0.62 | 0.82 | 1.2  | 1.83 | 12   | 0.87 | 1.25 | 0.73 | 2.12 | 2.21 |
| 0.76 | 0.67 | 0.71 | 0.96 | 4.06 | 0.52 | 0.59 | 0.98 | 0.14 | 1.9  | 0.76 |
| 1.33 | 0.75 | 0.78 | 0.88 | 1.37 | 2.93 | 1.28 | 0.72 | 1.77 | 1.26 | 1.33 |
| 0.68 | 1.14 | 0.66 | 1.05 | 0.84 | 2.56 | 1.17 | 1.26 | 1.38 | 1.18 | 0.68 |
| 0.93 | 0.49 | 1    | 0.95 | 1.03 | 0.47 | 1.33 | 1.22 | 0.64 | 0.64 | 0.93 |
| 0.84 | 1.02 | 1    | 0.83 | 0.35 | 0.37 | 0.78 | 0.66 | 6.33 | 0.76 | 0.84 |
| 1.24 | 1.07 | 1.03 | 0.95 | 1.38 | 2.25 | 0.92 | 1.01 | 0.75 | 1.04 | 1.24 |
| 1.33 | 0.93 | 0.89 | 1.09 | 1.61 | 5.67 | 1.19 | 0.74 | 0.92 | 1.3  | 1.33 |
| 0.82 | 0.95 | 1.06 | 0.86 | 0.54 | 0.71 | 1.28 | 1.34 | 2.33 | 1.44 | 0.82 |
| 1.14 | 0.82 | 1.47 | 0.72 | 1.37 | 2.81 | 1    | 0.96 | 0.92 | 2.23 | 1.14 |
| 0.75 | 1.05 | 1.46 | 1.75 | 1.65 | 0.54 | 0.8  | 0.78 | 1.15 | 0.83 | 0.75 |
| 1.99 | 0.85 | 0.22 | 1.02 | 1.24 | 2.22 | 0.5  | 0.56 | 2.11 | 0.19 | 1.99 |
| 1.27 | 0.74 | 1    | 1.1  | 0.89 | 1.5  | 0.97 | 0.93 | 1.34 | 1.42 | 1.27 |
| 0.94 | 1.33 | 2.35 | 1.34 | 3.64 | 1.01 | 0.8  | 0.97 | 2.76 | 1.52 | 0.94 |
| 1.4  | 1.06 | 1.95 | 2.26 | 3.66 | 2.5  | 2.34 | 1.15 | 2.71 | 1.81 | 1.4  |

|      |      |      |       |      |      |       |      |       |      |      |
|------|------|------|-------|------|------|-------|------|-------|------|------|
| 1.07 | 1.05 | 0.85 | 0.87  | 0.92 | 1.39 | 0.96  | 0.9  | 0.83  | 1.15 | 1.07 |
| 1.06 | 1.1  | 0.92 | 0.93  | 0.94 | 0.94 | 0.94  | 1.01 | 0.72  | 0.88 | 1.06 |
| 2.45 | 6.31 | 5.96 | 3.93  | 0.43 | 0.92 | 5.63  | 2.47 | 123.5 | 0.82 | 2.45 |
| 0.59 | 0.75 | 0.59 | 1.2   | 0.71 | 0.97 | 1.23  | 1.04 | 0.61  | 0.66 | 0.59 |
| 0.73 | 1.07 | 0.89 | 0.74  | 1.34 | 1.6  | 0.85  | 0.76 | 0.96  | 0.8  | 0.73 |
| 1.28 | 1.1  | 0.99 | 1.12  | 0.81 | 1.04 | 1.14  | 1.09 | 0.83  | 1.02 | 1.28 |
| 1.25 | 1.03 | 1.1  | 1.07  | 1.13 | 1.42 | 1.01  | 0.97 | 1.37  | 1.17 | 1.25 |
| 1.07 | 0.96 | 1.15 | 0.84  | 1.16 | 0.31 | 1.11  | 1.01 | 0.67  | 0.79 | 1.07 |
| 1.24 | 0.92 | 0.89 | 0.77  | 1.83 | 7.91 | 0.94  | 1.15 | 1.06  | 1.09 | 1.24 |
| 1.08 | 0.79 | 1.18 | 1.27  | 1    | 5.2  | 1.15  | 1.02 | 1.11  | 0.95 | 1.08 |
| 1.25 | 1.07 | 1.12 | 0.97  | 0.62 | 2.82 | 1.03  | 1.01 | 0.51  | 0.94 | 1.25 |
| 1.69 | 79.4 | 3.52 | 15.01 | 5.63 | 0.44 | 67.85 | 1.37 | 0.68  | 2.03 | 1.69 |
| 1.35 | 1    | 1.23 | 0.84  | 1.55 | 0.81 | 1.01  | 0.99 | 0.75  | 0.76 | 1.35 |
| 1.16 | 0.84 | 0.46 | 0.92  | 2.34 | 0.75 | 0.79  | 1    | 1.14  | 1.08 | 1.16 |

| 218902_at | 213330_s_at | 201131_s_at | 207451_at | 203035_s_at | 209360_s_at | 212748_at | 204020_at | 218902_at | 201029_s_at | 213342_at |
|-----------|-------------|-------------|-----------|-------------|-------------|-----------|-----------|-----------|-------------|-----------|
| 1.27      | 1           | 0.94        | 0.56      | 1.14        | 0.89        | 1.17      | 0.89      | 1.27      | 0.99        | 1.02      |
| 1.02      | 1.12        | 0.87        | 0.71      | 0.92        | 0.51        | 1.05      | 1.12      | 1.02      | 1.24        | 2.17      |
| 1.77      | 0.97        | 4.13        | 0.72      | 0.91        | 1.03        | 1.36      | 1.58      | 1.77      | 1.23        | 2.24      |
| 1.36      | 1.06        | 1.06        | 4.05      | 0.97        | 1.19        | 1.15      | 0.8       | 1.36      | 0.95        | 1.37      |
| 1.27      | 0.84        | 0.32        | 0.87      | 0.9         | 1.29        | 0.8       | 0.97      | 1.27      | 0.99        | 1.07      |
| 0.91      | 1.05        | 2.39        | 6.29      | 0.91        | 0.8         | 0.84      | 0.98      | 0.91      | 1.13        | 3.76      |
| 0.34      | 0.88        | 0.25        | 0.7       | 1           | 0.63        | 0.83      | 1.24      | 0.34      | 1.88        | 1.04      |
| 1.05      | 1.21        | 2.16        | 0.56      | 1.05        | 0.87        | 1.04      | 0.99      | 1.05      | 0.78        | 3.5       |
| 0.77      | 1.02        | 0.7         | 0.53      | 0.86        | 0.72        | 1.04      | 1.11      | 0.77      | 0.93        | 1.01      |
| 1.23      | 1.45        | 0.5         | 1.24      | 0.71        | 0.68        | 1.06      | 0.77      | 1.23      | 1.06        | 1.04      |
| 1.3       | 0.86        | 1.85        | 0.81      | 1.06        | 1.09        | 1.11      | 1.05      | 1.3       | 1.03        | 0.63      |
| 0.9       | 1.49        | 1.88        | 3         | 0.98        | 0.82        | 1.08      | 0.88      | 0.9       | 1.06        | 1.22      |
| 0.96      | 1.37        | 1.8         | 0.86      | 0.76        | 0.77        | 1.24      | 1.07      | 0.96      | 1.6         | 0.91      |
| 0.65      | 0.22        | 0.05        | 1.7       | 0.08        | 0.71        | 2.94      | 2.66      | 0.65      | 0.09        | 0.47      |
| 0.72      | 2.07        | 0.82        | 2.82      | 1           | 1.26        | 1.5       | 1.37      | 0.72      | 1.12        | 1.04      |
| 0.87      | 1.11        | 1.46        | 1.09      | 1.33        | 0.8         | 1.44      | 1         | 0.87      | 1.78        | 1.26      |
| 1.15      | 1.28        | 1.69        | 0.75      | 1.24        | 0.88        | 1.04      | 1.09      | 1.15      | 0.91        | 0.94      |
| 1.52      | 1.11        | 0.95        | 4.38      | 1.14        | 1.39        | 1.47      | 1.22      | 1.52      | 1.53        | 1.36      |
| 6.36      | 0.81        | 7           | 2.33      | 1.62        | 1.2         | 0.97      | 1.12      | 6.36      | 1.36        | 2.72      |
| 0.57      | 0.95        | 0.71        | 24.53     | 0.85        | 8.37        | 3.37      | 0.84      | 0.57      | 0.82        | 0.93      |
| 1.06      | 0.92        | 5.79        | 1.17      | 1.41        | 0.8         | 0.9       | 1.49      | 1.06      | 1.39        | 0.88      |
| 1.18      | 0.71        | 1.07        | 2.92      | 2.3         | 1.45        | 2.21      | 0.89      | 1.18      | 2.13        | 0.53      |
| 0.75      | 0.88        | 20.64       | 3.07      | 0.87        | 1.1         | 1.16      | 0.9       | 0.75      | 1.06        | 0.87      |
| 0.28      | 1.07        | 0           | 1.2       | 1.53        | 1.03        | 0.94      | 0.78      | 0.28      | 1.01        | 0.78      |
| 0.52      | 1.14        | 0.06        | 0.6       | 2.37        | 1.89        | 0.68      | 1.04      | 0.52      | 0.67        | 1.35      |
| 1.86      | 1.05        | 1.05        | 1.56      | 0.93        | 0.94        | 0.99      | 0.47      | 1.86      | 0.71        | 1.07      |
| 0.88      | 0.91        | 4.08        | 2.18      | 1.26        | 0.9         | 1.08      | 0.71      | 0.88      | 0.52        | 0.87      |
| 0.59      | 0.93        | 0.38        | 1.98      | 1.54        | 1.03        | 2.15      | 0.74      | 0.59      | 0.77        | 0.67      |
| 1.47      | 2.03        | 63.41       | 0.95      | 1.47        | 0.4         | 1.03      | 1.01      | 1.47      | 1.25        | 0.51      |
| 1.27      | 0.92        | 1.24        | 4.22      | 1.2         | 1.03        | 1.29      | 1.14      | 1.27      | 0.99        | 1.32      |

|      |      |       |      |      |      |      |      |      |      |      |
|------|------|-------|------|------|------|------|------|------|------|------|
| 0.62 | 1.75 | 0.49  | 0.76 | 0.81 | 0.79 | 0.63 | 1    | 0.62 | 0.56 | 5.19 |
| 0.83 | 2.7  | 0.18  | 2.66 | 1.98 | 0.53 | 1.96 | 2.51 | 0.83 | 3.69 | 1.16 |
| 1.12 | 0.99 | 1.04  | 1.62 | 1.01 | 1    | 1.15 | 1.11 | 1.12 | 1.02 | 0.96 |
| 0.4  | 1.2  | 0.26  | 3.17 | 0.93 | 0.31 | 0.41 | 0.56 | 0.4  | 1.03 | 0.78 |
| 0.47 | 0.43 | 4     | 0.9  | 0.38 | 0.71 | 5.07 | 1.88 | 0.47 | 2.13 | 40.4 |
| 5.39 | 0.69 | 0.66  | 3.03 | 0.64 | 2.58 | 1.08 | 0.58 | 5.39 | 0.52 | 1.2  |
| 2.09 | 1.17 | 11.14 | 0.52 | 0.6  | 0.32 | 0.77 | 0.57 | 2.09 | 0.5  | 0.57 |
| 1    | 0.9  | 2.5   | 0.33 | 1.08 | 1.05 | 1.06 | 0.77 | 1    | 0.97 | 0.88 |
| 0.71 | 0.94 | 0.98  | 0.76 | 0.96 | 0.82 | 0.6  | 1.88 | 0.71 | 1.65 | 0.63 |
| 0.4  | 0.89 | 0.12  | 0.42 | 0.84 | 2.14 | 2.32 | 1    | 0.4  | 0.89 | 1.02 |
| 0.99 | 1.25 | 1.83  | 0.81 | 1.23 | 2.8  | 0.78 | 1.03 | 0.99 | 1.01 | 1.08 |
| 1.66 | 0.93 | 0.35  | 3.1  | 1.02 | 0.78 | 0.76 | 0.89 | 1.66 | 1.01 | 0.9  |
| 0.76 | 0.98 | 1.35  | 0.43 | 0.91 | 1.59 | 1.62 | 1.08 | 0.76 | 0.82 | 1.36 |
| 1.64 | 0.96 | 2.6   | 1.89 | 1.21 | 2.86 | 1.06 | 1.39 | 1.64 | 2.25 | 1.62 |
| 0.86 | 1.06 | 1.32  | 0.43 | 0.76 | 1.53 | 1.34 | 0.97 | 0.86 | 0.81 | 1.24 |
| 1.06 | 1.07 | 9.73  | 0.59 | 0.96 | 2.83 | 1.28 | 1.06 | 1.06 | 0.78 | 1.29 |
| 0.86 | 1.01 | 1.06  | 1.55 | 0.99 | 1.08 | 1.04 | 1.09 | 0.86 | 1.22 | 0.84 |
| 0.85 | 0.82 | 0.49  | 0.95 | 0.88 | 1.36 | 1.31 | 0.64 | 0.85 | 0.87 | 1.23 |
| 1.2  | 0.99 | 0.79  | 2.15 | 1.04 | 1.05 | 0.99 | 1    | 1.2  | 0.93 | 0.95 |
| 1.29 | 1.23 | 0.17  | 0.85 | 1.09 | 0.77 | 0.71 | 1.2  | 1.29 | 1.5  | 0.83 |
| 0.69 | 1.08 | 0.87  | 0.94 | 0.9  | 0.74 | 0.95 | 0.97 | 0.69 | 0.97 | 0.81 |
| 0.86 | 0.91 | 0.98  | 2.14 | 0.77 | 1.21 | 1.15 | 1.24 | 0.86 | 0.83 | 0.73 |
| 0.82 | 0.87 | 1.68  | 1.03 | 0.74 | 1.09 | 1.33 | 0.8  | 0.82 | 0.91 | 1.18 |
| 1.02 | 0.88 | 1.08  | 1.76 | 0.93 | 4.23 | 1.32 | 1.25 | 1.02 | 1.84 | 2.26 |
| 1.67 | 1.4  | 4.12  | 1    | 1.02 | 0.58 | 0.73 | 0.79 | 1.67 | 0.83 | 1.23 |
| 1.01 | 1.4  | 0.2   | 0.49 | 0.99 | 0.57 | 0.81 | 0.85 | 1.01 | 1.01 | 1.26 |
| 1.08 | 1.91 | 4.83  | 2.98 | 0.91 | 1.32 | 1.29 | 0.7  | 1.08 | 1.36 | 1.54 |
| 0.88 | 0.67 | 1.43  | 1.72 | 0.99 | 2.78 | 1.41 | 1    | 0.88 | 0.71 | 1.18 |
| 1.52 | 0.76 | 1.01  | 1.26 | 1.35 | 1.1  | 1.07 | 0.91 | 1.52 | 1.23 | 0.95 |
| 0.86 | 1.03 | 1.33  | 0.52 | 0.78 | 0.91 | 1.27 | 0.99 | 0.86 | 0.59 | 1.5  |
| 0.61 | 0.68 | 0.75  | 2.18 | 1.01 | 3.68 | 0.99 | 1.49 | 0.61 | 6.39 | 1.09 |
| 1.39 | 0.61 | 1.09  | 1.04 | 1.05 | 1.32 | 1.47 | 1.32 | 1.39 | 1.18 | 0.98 |
| 1.53 | 0.87 | 3.78  | 1.28 | 1.45 | 2.64 | 1.63 | 0.94 | 1.53 | 1.12 | 1.27 |

|      |      |        |      |       |       |      |      |      |      |       |
|------|------|--------|------|-------|-------|------|------|------|------|-------|
| 0.72 | 1.14 | 0.14   | 0.69 | 1.26  | 1.05  | 1.04 | 1.09 | 0.72 | 1.81 | 0.98  |
| 1.81 | 1.19 | 2.08   | 1.85 | 1.08  | 0.94  | 1.14 | 1.09 | 1.81 | 0.96 | 0.78  |
| 0.74 | 1.11 | 251.75 | 0.73 | 1.09  | 0.89  | 1.11 | 1.21 | 0.74 | 1.18 | 0.98  |
| 1.47 | 0.97 | 2.83   | 1.24 | 1.19  | 2.76  | 1.28 | 1.29 | 1.47 | 1.14 | 1.13  |
| 0.99 | 0.85 | 1.56   | 1.94 | 0.84  | 1.17  | 0.97 | 1.27 | 0.99 | 0.9  | 0.9   |
| 1.69 | 0.92 | 0.82   | 0.61 | 0.94  | 0.9   | 0.53 | 2.5  | 1.69 | 1.36 | 0.74  |
| 1.12 | 1.2  | 0.67   | 4.14 | 0.59  | 0.65  | 1.17 | 1.69 | 1.12 | 0.76 | 1.73  |
| 0.94 | 1.64 | 0.66   | 4.24 | 1.02  | 0.92  | 1.73 | 0.92 | 0.94 | 1.06 | 0.87  |
| 0.75 | 0.88 | 1.63   | 1.48 | 1.31  | 3.41  | 2.83 | 0.79 | 0.75 | 1.49 | 0.88  |
| 1.27 | 0.81 | 1.52   | 1.54 | 1.15  | 0.92  | 1.24 | 1.3  | 1.27 | 1.03 | 1.26  |
| 1.56 | 1.15 | 10.38  | 2.38 | 1.24  | 0.91  | 0.99 | 1.55 | 1.56 | 0.82 | 2.14  |
| 1.36 | 1.58 | 1.06   | 1.37 | 0.87  | 11.73 | 0.93 | 1.01 | 1.36 | 0.84 | 1.26  |
| 1.34 | 0.72 | 1.41   | 5.25 | 0.95  | 1.23  | 1.08 | 0.84 | 1.34 | 1.21 | 1.11  |
| 1.24 | 1.02 | 0.74   | 5.36 | 1.26  | 1.45  | 1.2  | 1.39 | 1.24 | 0.51 | 1.18  |
| 0.91 | 1.75 | 2.67   | 1.33 | 1.09  | 1.03  | 1.37 | 0.83 | 0.91 | 1.16 | 2     |
| 0.3  | 0.49 | 2.37   | 0.22 | 14.79 | 2.12  | 2.87 | 0.03 | 0.3  | 9.65 | 52.59 |
| 1.04 | 0.95 | 0.9    | 1.62 | 1.46  | 1.45  | 2.09 | 1.44 | 1.04 | 0.67 | 1.07  |
| 0.89 | 0.64 | 0.1    | 0.27 | 0.62  | 1.2   | 1.11 | 0.87 | 0.89 | 0.82 | 2.06  |
| 0.79 | 1.11 | 1.63   | 4.4  | 0.95  | 0.78  | 0.78 | 1.17 | 0.79 | 0.87 | 1.52  |
| 2.04 | 1.42 | 1.19   | 2.36 | 1.22  | 0.65  | 2.38 | 0.82 | 2.04 | 0.93 | 5.36  |
| 1.71 | 0.42 | 279    | 0.47 | 1.45  | 8.44  | 2.29 | 0.48 | 1.71 | 2.97 | 0.88  |
| 0.94 | 1.38 | 4.57   | 1.01 | 1.08  | 6.51  | 1.09 | 1.12 | 0.94 | 1.02 | 0.78  |
| 0.39 | 1.37 | 0.53   | 2    | 0.97  | 0.57  | 1.06 | 1.14 | 0.39 | 1.62 | 0.86  |
| 0.73 | 0.43 | 0.85   | 0.52 | 2.16  | 0.46  | 0.89 | 2.14 | 0.73 | 1.04 | 1.26  |
| 1.17 | 0.95 | 1.12   | 1.28 | 0.94  | 1.02  | 0.88 | 1.82 | 1.17 | 1.3  | 1.55  |
| 0.67 | 0.94 | 1.36   | 1.38 | 1     | 1     | 0.76 | 0.94 | 0.67 | 1.08 | 1.15  |
| 1.1  | 1.39 | 1.04   | 1.24 | 0.98  | 0.78  | 1.05 | 0.71 | 1.1  | 1.19 | 0.84  |
| 1.51 | 1.17 | 0.51   | 0.66 | 0.98  | 0.84  | 0.99 | 1.01 | 1.51 | 1.19 | 2.29  |
| 0.98 | 1.32 | 1.49   | 1.58 | 1.13  | 0.93  | 1.08 | 1.12 | 0.98 | 1.19 | 1.2   |
| 1.05 | 0.99 | 0.94   | 0.99 | 0.89  | 1     | 1.23 | 0.94 | 1.05 | 0.8  | 1.02  |
| 1.28 | 1.03 | 0.78   | 2.7  | 0.86  | 1.38  | 1.19 | 0.94 | 1.28 | 1.02 | 0.9   |
| 0.79 | 0.95 | 2.92   | 3.25 | 1.03  | 2.6   | 1.04 | 0.96 | 0.79 | 0.95 | 0.82  |
| 1.37 | 0.87 | 2      | 3    | 1.34  | 0.79  | 1.19 | 1.03 | 1.37 | 1.31 | 1.65  |

|      |      |       |      |      |      |      |      |      |      |      |
|------|------|-------|------|------|------|------|------|------|------|------|
| 1    | 1.65 | 1.34  | 1.96 | 1.3  | 1.03 | 1.07 | 1.16 | 1    | 0.64 | 0.8  |
| 1.17 | 1.07 | 1.67  | 1.39 | 1.04 | 0.74 | 1.15 | 0.96 | 1.17 | 0.82 | 0.63 |
| 1.18 | 1.04 | 0.98  | 0.71 | 1.17 | 1.1  | 0.96 | 1.21 | 1.18 | 0.92 | 0.99 |
| 1.3  | 1.1  | 1.31  | 3.85 | 0.65 | 3.53 | 2.84 | 0.67 | 1.3  | 0.84 | 1.11 |
| 0.86 | 0.86 | 1.47  | 0.63 | 1.02 | 1.28 | 0.85 | 1.49 | 0.86 | 1.18 | 0.73 |
| 0.65 | 2    | 0.85  | 0.95 | 0.85 | 0.34 | 0.98 | 0.68 | 0.65 | 0.55 | 0.6  |
| 0.81 | 0.9  | 1.73  | 3.04 | 0.97 | 0.86 | 1.42 | 0.94 | 0.81 | 0.74 | 1.16 |
| 0.87 | 0.75 | 4.3   | 1.07 | 1.62 | 1.23 | 0.92 | 0.85 | 0.87 | 0.77 | 1.26 |
| 0.86 | 1.08 | 0.73  | 0.95 | 1.01 | 0.79 | 1.26 | 0.64 | 0.86 | 1.16 | 1.23 |
| 0.97 | 1.06 | 0.67  | 2.75 | 1.06 | 1.04 | 1.25 | 1.11 | 0.97 | 0.88 | 1.19 |
| 1.06 | 1.64 | 3.03  | 3.41 | 1.28 | 1.18 | 1.77 | 0.87 | 1.06 | 1.06 | 1.2  |
| 1.31 | 0.82 | 0.98  | 1.35 | 1.26 | 1.25 | 1.15 | 1.1  | 1.31 | 1.09 | 0.91 |
| 1.78 | 1.68 | 1.5   | 1.46 | 0.83 | 0.71 | 1    | 0.93 | 1.78 | 0.78 | 0.91 |
| 0.57 | 1.44 | 0.52  | 1.36 | 1.16 | 0.53 | 0.67 | 0.92 | 0.57 | 0.97 | 0.98 |
| 0.99 | 0.88 | 1.09  | 1.31 | 0.96 | 0.55 | 1.21 | 1.06 | 0.99 | 1    | 1.11 |
| 1.79 | 1.26 | 13.72 | 2.62 | 1.15 | 1.3  | 1.02 | 1.22 | 1.79 | 1.18 | 3.63 |
| 1.24 | 0.85 | 0.7   | 0.73 | 0.81 | 1.1  | 1    | 1.05 | 1.24 | 0.85 | 0.56 |
| 1.76 | 1.12 | 3.63  | 1.41 | 1.12 | 3.21 | 1.22 | 1.11 | 1.76 | 1.32 | 1.29 |
| 1.13 | 0.75 | 1.39  | 2.74 | 1.59 | 0.85 | 1.43 | 0.78 | 1.13 | 1.35 | 1.48 |
| 1.47 | 1.9  | 0.07  | 1.82 | 0.9  | 1.06 | 1.01 | 1.19 | 1.47 | 1.09 | 0.96 |
| 1.03 | 1.36 | 1.2   | 0.64 | 0.84 | 0.84 | 0.79 | 1.66 | 1.03 | 1.41 | 1.34 |
| 1.18 | 1.26 | 0.25  | 1.96 | 0.73 | 1.13 | 1.04 | 1.18 | 1.18 | 1    | 1.03 |
| 1.13 | 0.81 | 1.04  | 1.3  | 1.2  | 1.39 | 1.03 | 0.97 | 1.13 | 1.11 | 0.76 |
| 2.95 | 0.49 | 0.85  | 0.58 | 0.61 | 0.87 | 1.58 | 1.63 | 2.95 | 0.44 | 0.67 |
| 1.7  | 1.18 | 7.96  | 3.3  | 0.6  | 1.04 | 1.17 | 0.95 | 1.7  | 0.81 | 1.2  |
| 0.54 | 0.73 | 0.92  | 1.76 | 1    | 1.49 | 1.05 | 0.47 | 0.54 | 0.93 | 1.39 |
| 1.01 | 1.21 | 0.97  | 0.82 | 0.86 | 1.2  | 0.81 | 0.91 | 1.01 | 0.93 | 0.99 |
| 1.5  | 0.59 | 2.79  | 0.85 | 1.07 | 0.85 | 1    | 0.88 | 1.5  | 1.82 | 0.87 |
| 0.51 | 0.92 | 1.24  | 0.24 | 1.03 | 1.07 | 0.96 | 0.82 | 0.51 | 1.01 | 1.12 |
| 1.12 | 0.96 | 1     | 1.63 | 1.13 | 0.92 | 1.06 | 0.93 | 1.12 | 0.99 | 0.86 |
| 1.12 | 0.96 | 1.61  | 1.46 | 0.98 | 0.95 | 1.23 | 0.92 | 1.12 | 0.66 | 0.2  |
| 1.81 | 1.19 | 2.08  | 1.85 | 1.08 | 0.94 | 1.14 | 1.09 | 1.81 | 0.96 | 0.78 |
| 0.89 | 0.96 | 0.93  | 1.3  | 0.94 | 0.81 | 0.77 | 1.1  | 0.89 | 0.9  | 1.15 |

|      |      |      |      |      |       |      |      |      |      |      |
|------|------|------|------|------|-------|------|------|------|------|------|
| 0.98 | 1.75 | 3.07 | 1.56 | 1.54 | 0.36  | 0.95 | 1.3  | 0.98 | 0.86 | 1.32 |
| 0.95 | 1.1  | 0.96 | 1.3  | 1.12 | 0.84  | 1.34 | 0.81 | 0.95 | 1.21 | 1.01 |
| 1.23 | 0.85 | 0.52 | 1.09 | 1.19 | 0.7   | 0.88 | 1.04 | 1.23 | 1.02 | 1.25 |
| 1.23 | 1.15 | 1.77 | 0.98 | 1.02 | 3.24  | 1.1  | 1    | 1.23 | 0.56 | 8.57 |
| 0.67 | 0.89 | 6.35 | 1.58 | 0.89 | 0.82  | 0.86 | 1.08 | 0.67 | 0.98 | 0.94 |
| 1.04 | 1.17 | 1.31 | 2.4  | 1.15 | 1.01  | 0.97 | 0.98 | 1.04 | 0.96 | 1.05 |
| 1.2  | 1.14 | 0.92 | 1.92 | 0.96 | 0.86  | 1    | 0.92 | 1.2  | 0.96 | 0.94 |
| 1.28 | 0.94 | 3.52 | 1.12 | 1.04 | 0.8   | 1.01 | 1.06 | 1.28 | 0.84 | 1.18 |
| 1.47 | 0.89 | 2.27 | 1.12 | 1.26 | 1.33  | 0.66 | 1.32 | 1.47 | 0.98 | 0.62 |
| 1.38 | 1.25 | 1.5  | 1.29 | 1    | 0.84  | 1.14 | 0.99 | 1.38 | 1.34 | 1.05 |
| 1.05 | 1.2  | 0.51 | 3.33 | 1.02 | 0.47  | 1.05 | 0.88 | 1.05 | 0.94 | 0.59 |
| 0.8  | 1.05 | 1.28 | 1.12 | 1.14 | 0.92  | 0.71 | 1    | 0.8  | 0.9  | 1.09 |
| 1.72 | 1.04 | 2.18 | 1.04 | 1.3  | 2.59  | 1.04 | 1.2  | 1.72 | 1.22 | 1.15 |
| 1.53 | 0.71 | 2.19 | 0.91 | 1.04 | 0.67  | 0.94 | 1.28 | 1.53 | 0.94 | 1.08 |
| 0.45 | 0.27 | 1.87 | 0.79 | 1.14 | 1.03  | 0.57 | 1.46 | 0.45 | 1.79 | 2.65 |
| 1.07 | 1.08 | 0.8  | 1.13 | 1.11 | 1     | 1.03 | 0.98 | 1.07 | 1.34 | 0.28 |
| 0.89 | 0.99 | 1.06 | 1.46 | 0.85 | 1.58  | 0.84 | 1.03 | 0.89 | 1    | 0.84 |
| 1.03 | 1.4  | 7.66 | 3.14 | 1.46 | 0.72  | 0.87 | 1.02 | 1.03 | 0.76 | 2.47 |
| 0.8  | 1.04 | 2.43 | 2.29 | 1.05 | 0.74  | 0.95 | 0.83 | 0.8  | 1.03 | 0.87 |
| 0.85 | 0.89 | 1.15 | 1.27 | 0.84 | 0.97  | 1.2  | 1.19 | 0.85 | 1.16 | 1.02 |
| 1.46 | 1.24 | 0.95 | 0.51 | 1.85 | 1.35  | 1.07 | 1.13 | 1.46 | 0.87 | 1.15 |
| 0.46 | 0.65 | 0.96 | 1.09 | 0.93 | 1.23  | 0.8  | 1.16 | 0.46 | 1.07 | 1.23 |
| 1.02 | 0.98 | 0.86 | 1.76 | 0.92 | 1.16  | 1.13 | 1.03 | 1.02 | 1.14 | 3.56 |
| 1.37 | 0.63 | 0.34 | 1.97 | 0.86 | 0.27  | 1.06 | 1.08 | 1.37 | 0.9  | 1.37 |
| 1.32 | 0.86 | 1.81 | 1.67 | 1.41 | 0.93  | 1.28 | 1.12 | 1.32 | 1.02 | 1.32 |
| 1.06 | 0.91 | 1.1  | 0.89 | 0.88 | 0.78  | 0.87 | 1.18 | 1.06 | 1.25 | 0.82 |
| 0.88 | 0.88 | 1.98 | 3.51 | 0.87 | 0.66  | 1.01 | 0.91 | 0.88 | 1.09 | 0.83 |
| 1.25 | 0.92 | 0.99 | 2.47 | 1.09 | 1.37  | 1.03 | 0.99 | 1.25 | 0.9  | 1.13 |
| 1.05 | 0.63 | 1.67 | 1.01 | 1.08 | 3.08  | 1.23 | 1.08 | 1.05 | 1.04 | 1.2  |
| 0.97 | 0.93 | 0.52 | 1.53 | 0.87 | 1.12  | 0.85 | 1.03 | 0.97 | 0.99 | 0.83 |
| 0.85 | 1.12 | 1.09 | 3.63 | 0.87 | 0.98  | 0.83 | 0.7  | 0.85 | 0.93 | 2.19 |
| 0.8  | 1.03 | 1    | 0.99 | 0.98 | 13.94 | 1.08 | 0.85 | 0.8  | 1.08 | 1.03 |
| 0.8  | 1.07 | 0.84 | 0.79 | 1.06 | 0.98  | 1.09 | 1.02 | 0.8  | 1.02 | 3.17 |

|      |      |        |      |      |      |      |      |      |      |      |
|------|------|--------|------|------|------|------|------|------|------|------|
| 0.69 | 0.85 | 1.65   | 0.69 | 0.93 | 3.9  | 2.45 | 0.66 | 0.69 | 1.4  | 1.31 |
| 0.85 | 1.15 | 1.73   | 0.83 | 1.03 | 1.05 | 1.13 | 1.01 | 0.85 | 0.99 | 1.12 |
| 0.93 | 1.13 | 0.84   | 1.36 | 0.98 | 0.97 | 1.02 | 1.03 | 0.93 | 0.85 | 1.04 |
| 1.34 | 0.43 | 0.55   | 0.53 | 0.67 | 1    | 0.92 | 1.18 | 1.34 | 0.64 | 0.5  |
| 0.68 | 1.31 | 1.04   | 6    | 1.44 | 0.78 | 1.26 | 0.61 | 0.68 | 0.44 | 0.75 |
| 1.2  | 0.89 | 1.46   | 2.12 | 1.02 | 1.01 | 1.03 | 0.88 | 1.2  | 1.06 | 0.95 |
| 0.66 | 1.64 | 0.57   | 0.84 | 0.86 | 0.78 | 0.65 | 1.02 | 0.66 | 0.55 | 4.07 |
| 1.4  | 1.09 | 2.47   | 0.72 | 0.81 | 1.22 | 0.78 | 1.01 | 1.4  | 0.94 | 0.77 |
| 1.18 | 0.92 | 0.53   | 0.66 | 1.29 | 0.66 | 1.22 | 1.03 | 1.18 | 1.29 | 1.62 |
| 0.6  | 1.62 | 2.12   | 0.74 | 0.77 | 1.02 | 0.61 | 1.02 | 0.6  | 0.57 | 2.85 |
| 1.18 | 1.94 | 0.81   | 1.23 | 1.62 | 1.33 | 0.81 | 1    | 1.18 | 0.88 | 0.93 |
| 0.52 | 0.89 | 2.12   | 3.4  | 0.94 | 0.85 | 1.17 | 0.93 | 0.52 | 1.63 | 1.27 |
| 0.84 | 0.88 | 1.02   | 0.82 | 0.96 | 1    | 0.88 | 0.81 | 0.84 | 0.69 | 0.85 |
| 0.93 | 0.93 | 5.69   | 1.35 | 1.54 | 0.82 | 0.98 | 0.97 | 0.93 | 0.95 | 4.53 |
| 1.12 | 1.2  | 2.01   | 2.7  | 0.9  | 2.1  | 1.18 | 1.06 | 1.12 | 0.66 | 3.14 |
| 0.71 | 1.14 | 0.93   | 0.75 | 0.86 | 0.5  | 0.98 | 1.05 | 0.71 | 1.12 | 1.18 |
| 1.14 | 1.23 | 1.75   | 2.06 | 1.29 | 1.19 | 1.09 | 1.03 | 1.14 | 0.89 | 5    |
| 1.17 | 0.93 | 1.13   | 1.59 | 0.72 | 0.91 | 0.8  | 0.93 | 1.17 | 0.89 | 1.01 |
| 0.93 | 1.13 | 0.92   | 1.22 | 0.63 | 2.32 | 0.71 | 1.3  | 0.93 | 1.4  | 1.38 |
| 0.8  | 0.73 | 1.08   | 0.3  | 1.29 | 0.89 | 0.94 | 1.31 | 0.8  | 1.08 | 1.48 |
| 2.1  | 1.33 | 0.9    | 3    | 1.01 | 0.73 | 2.46 | 0.78 | 2.1  | 1.12 | 0.9  |
| 1.09 | 7.28 | 709.31 | 0.52 | 0.79 | 0.16 | 1.05 | 1.99 | 1.09 | 2.5  | 0.94 |
| 0.89 | 1.13 | 6.58   | 0.84 | 1.43 | 0.75 | 1.24 | 0.99 | 0.89 | 0.98 | 1.3  |
| 0.98 | 1.14 | 1.43   | 1.88 | 0.8  | 4.07 | 1.73 | 1.18 | 0.98 | 1.19 | 1.58 |
| 0.87 | 0.8  | 2.31   | 0.79 | 1.03 | 1.35 | 0.84 | 0.91 | 0.87 | 0.94 | 1.04 |
| 1.75 | 0.67 | 0.22   | 3.04 | 0.74 | 8.09 | 1.01 | 1.61 | 1.75 | 1.44 | 0.84 |
| 1    | 0.91 | 1.04   | 1.18 | 1.04 | 1.46 | 1.13 | 1.19 | 1    | 1.08 | 1.39 |
| 1.14 | 1.02 | 0.68   | 1.37 | 1.02 | 1.02 | 1.04 | 0.84 | 1.14 | 1.1  | 2.72 |
| 0.97 | 1.06 | 0.83   | 2.85 | 1.03 | 1.03 | 0.99 | 1.01 | 0.97 | 0.95 | 3.84 |
| 1.02 | 0.91 | 1.17   | 0.22 | 0.98 | 1.1  | 1.07 | 1.1  | 1.02 | 1    | 0.97 |
| 0.89 | 1.55 | 1.16   | 1.68 | 1.08 | 1.12 | 0.71 | 1.03 | 0.89 | 1.11 | 1.14 |
| 0.88 | 1.05 | 1.08   | 0.8  | 0.94 | 0.88 | 0.9  | 0.95 | 0.88 | 0.96 | 0.9  |
| 1.23 | 0.88 | 5.57   | 5.97 | 0.67 | 1.03 | 0.88 | 0.85 | 1.23 | 1.14 | 0.66 |



|      |      |      |      |      |      |      |      |      |      |      |
|------|------|------|------|------|------|------|------|------|------|------|
| 1.13 | 1.06 | 0.11 | 4.22 | 1.17 | 1.09 | 1.84 | 0.86 | 1.13 | 1.26 | 0.95 |
| 1.4  | 1.09 | 1.4  | 0.14 | 0.76 | 1.5  | 0.87 | 0.79 | 1.4  | 1.3  | 1.44 |
| 0.85 | 0.64 | 1.05 | 0.84 | 0.89 | 1.08 | 0.53 | 1.08 | 0.85 | 1.03 | 0.79 |
| 0.63 | 1.47 | 1.33 | 0.92 | 0.86 | 0.73 | 0.8  | 1.73 | 0.63 | 0.85 | 0.74 |
| 1.04 | 1.44 | 1.83 | 2.16 | 1.22 | 0.85 | 1.01 | 1.13 | 1.04 | 0.79 | 2.21 |
| 1.04 | 1.21 | 2.28 | 1.99 | 0.82 | 1.98 | 0.82 | 1.08 | 1.04 | 0.68 | 1.08 |
| 0.56 | 0.74 | 1.1  | 1.51 | 1.04 | 0.97 | 0.7  | 0.66 | 0.56 | 1.15 | 0.78 |
| 0.63 | 1.33 | 0.49 | 2.31 | 0.69 | 0.72 | 1.05 | 1.25 | 0.63 | 0.83 | 0.29 |
| 0.82 | 1.3  | 1.64 | 1.41 | 0.89 | 3.12 | 1.64 | 0.71 | 0.82 | 1.15 | 0.79 |
| 1.16 | 0.89 | 0.56 | 0.86 | 0.91 | 0.85 | 1.39 | 1.1  | 1.16 | 0.45 | 1.4  |
| 0.32 | 0.96 | 1.13 | 1.04 | 0.98 | 0.74 | 0.78 | 0.87 | 0.32 | 1.09 | 1.33 |
| 0.91 | 0.89 | 0.39 | 1.01 | 0.94 | 0.62 | 1.08 | 1    | 0.91 | 1.11 | 0.62 |
| 0.83 | 0.81 | 1.07 | 0.94 | 0.59 | 0.93 | 1.25 | 0.91 | 0.83 | 1.31 | 0.8  |
| 1.11 | 0.93 | 5.92 | 1.33 | 0.98 | 0.86 | 1.4  | 0.93 | 1.11 | 0.65 | 0.17 |
| 1    | 0.97 | 1.22 | 2.39 | 0.93 | 0.97 | 1.13 | 1.25 | 1    | 1.04 | 0.92 |
| 0.9  | 1    | 1.69 | 1.09 | 1.05 | 1.2  | 1.17 | 1.18 | 0.9  | 0.7  | 1.01 |
| 1.47 | 0.86 | 0.3  | 1.07 | 0.84 | 0.74 | 1.16 | 0.92 | 1.47 | 0.97 | 0.82 |
| 0.7  | 1.04 | 0.55 | 1.12 | 1.15 | 1.01 | 0.92 | 0.99 | 0.7  | 0.98 | 9.36 |
| 1.06 | 0.92 | 0.3  | 2.59 | 0.77 | 2.72 | 1.8  | 0.73 | 1.06 | 2.03 | 1.3  |
| 0.4  | 0.55 | 0.03 | 1.58 | 0.41 | 0.9  | 1.1  | 1.35 | 0.4  | 1.47 | 0.5  |
| 1.07 | 0.71 | 1.16 | 0.65 | 0.93 | 1.78 | 1.34 | 0.91 | 1.07 | 1.05 | 0.9  |
| 0.6  | 1.74 | 1.27 | 0.7  | 0.76 | 0.91 | 0.61 | 1    | 0.6  | 0.57 | 4.58 |
| 0.56 | 2.95 | 0.81 | 0.68 | 0.89 | 1.05 | 0.8  | 1.07 | 0.56 | 0.85 | 0.99 |
| 0.53 | 1.15 | 0    | 1.37 | 0.99 | 1.42 | 0.9  | 1.19 | 0.53 | 1.05 | 1.11 |
| 1.1  | 0.81 | 1.04 | 0.54 | 0.79 | 1    | 1.01 | 0.8  | 1.1  | 1.13 | 0.99 |
| 1.04 | 0.92 | 0.99 | 1.29 | 1.49 | 0.83 | 0.93 | 0.83 | 1.04 | 1.87 | 1.39 |
| 1.18 | 1.1  | 0.86 | 0.73 | 0.74 | 0.59 | 0.72 | 0.9  | 1.18 | 1.31 | 0.63 |
| 0.49 | 1.78 | 0.2  | 0.92 | 1.62 | 0.94 | 0.78 | 0.88 | 0.49 | 1.41 | 1.14 |
| 0.7  | 1.16 | 0.85 | 1.19 | 1.8  | 0.79 | 1.18 | 0.72 | 0.7  | 1.1  | 1.73 |
| 3    | 0.23 | 1.13 | 0.22 | 0.74 | 1.66 | 0.91 | 1.02 | 3    | 0.59 | 3.36 |
| 0.71 | 0.96 | 2    | 5    | 1.89 | 1.83 | 1.51 | 0.98 | 0.71 | 0.75 | 2.14 |
| 1.1  | 0.69 | 0.93 | 0.83 | 1.97 | 0.93 | 1.4  | 1.64 | 1.1  | 2.03 | 2.41 |
| 1.81 | 0.68 | 2.11 | 0.25 | 1.66 | 1.13 | 1.74 | 0.81 | 1.81 | 2.51 | 1.58 |

|      |      |       |      |      |      |      |      |      |      |      |
|------|------|-------|------|------|------|------|------|------|------|------|
| 1    | 1.34 | 4.12  | 4.5  | 1.01 | 1.34 | 0.96 | 1.04 | 1    | 1.13 | 0.88 |
| 0.79 | 0.91 | 0.75  | 3.93 | 1.03 | 0.97 | 1.02 | 1.23 | 0.79 | 0.92 | 0.55 |
| 0.96 | 6.75 | 2.87  | 15.4 | 0.51 | 0.94 | 3.28 | 1.72 | 0.96 | 1.28 | 8.79 |
| 0.96 | 0.85 | 0.23  | 1.16 | 0.8  | 1.05 | 1.66 | 0.61 | 0.96 | 0.73 | 0.7  |
| 0.97 | 0.9  | 56.41 | 0.95 | 0.94 | 0.92 | 1.12 | 0.77 | 0.97 | 1.01 | 1.01 |
| 1.07 | 1.09 | 2.31  | 0.95 | 1.16 | 1.1  | 0.88 | 1.13 | 1.07 | 1.08 | 0.73 |
| 1.11 | 1.23 | 0.89  | 1.16 | 0.99 | 1.1  | 1.06 | 1.19 | 1.11 | 0.98 | 0.91 |
| 1.32 | 1.08 | 2.26  | 1.84 | 0.91 | 0.95 | 0.59 | 1    | 1.32 | 0.77 | 1.04 |
| 1.38 | 0.92 | 1.11  | 4.62 | 0.72 | 1.03 | 1.17 | 0.99 | 1.38 | 1.64 | 1.06 |
| 0.9  | 1.01 | 1.06  | 1.51 | 1.62 | 0.66 | 0.97 | 0.86 | 0.9  | 0.93 | 1.45 |
| 1.05 | 0.97 | 2.73  | 0.97 | 1.04 | 1.52 | 1.31 | 1.14 | 1.05 | 1.11 | 0.98 |
| 3.33 | 1.14 | 0.29  | 0.2  | 0.09 | 0.51 | 0.63 | 23.3 | 3.33 | 0.62 | 0.28 |
| 0.87 | 0.93 | 0.87  | 1.35 | 1.15 | 0.97 | 1.61 | 1.16 | 0.87 | 0.54 | 1.07 |
| 0.76 | 0.82 | 26.12 | 1.35 | 1.07 | 0.69 | 1.09 | 0.95 | 0.76 | 0.78 | 1.02 |

| 201746_at | 201783_s_at | 203195_s_at | 208370_s_at | 201746_at | 207760_s_at | 207168_s_at | 201131_s_at | 201695_s_at | 202417_at | 209360_s_at |
|-----------|-------------|-------------|-------------|-----------|-------------|-------------|-------------|-------------|-----------|-------------|
| 0.92      | 1.07        | 1.04        | 1.8         | 0.92      | 1.08        | 0.97        | 0.94        | 1.03        | 1.07      | 0.89        |
| 0.88      | 0.94        | 1.14        | 1.06        | 0.88      | 0.73        | 0.92        | 0.87        | 0.69        | 1.29      | 0.51        |
| 0.94      | 1.28        | 0.97        | 1.49        | 0.94      | 0.99        | 0.97        | 4.13        | 1           | 1         | 1.03        |
| 1.02      | 0.95        | 1.45        | 1.16        | 1.02      | 1.06        | 0.93        | 1.06        | 1.07        | 0.89      | 1.19        |
| 0.89      | 0.99        | 1.17        | 0.79        | 0.89      | 0.81        | 1.02        | 0.32        | 1.34        | 0.8       | 1.29        |
| 0.95      | 1.1         | 0.94        | 1.55        | 0.95      | 0.95        | 0.97        | 2.39        | 1.18        | 0.97      | 0.8         |
| 0.14      | 0.64        | 1.12        | 0.47        | 0.14      | 1.02        | 0.96        | 0.25        | 1.49        | 0.71      | 0.63        |
| 1.36      | 1.46        | 1.29        | 1.14        | 1.36      | 1.02        | 0.94        | 2.16        | 1.14        | 1.26      | 0.87        |
| 0.82      | 0.98        | 1.11        | 0.89        | 0.82      | 0.71        | 1.04        | 0.7         | 1.25        | 0.88      | 0.72        |
| 1.42      | 1.53        | 1.06        | 2.52        | 1.42      | 0.76        | 0.85        | 0.5         | 2.37        | 0.77      | 0.68        |
| 0.68      | 1.05        | 0.93        | 0.78        | 0.68      | 1.02        | 1.02        | 1.85        | 1.08        | 1.02      | 1.09        |
| 0.93      | 0.89        | 1.02        | 1.04        | 0.93      | 0.91        | 1.31        | 1.88        | 1.45        | 1.05      | 0.82        |
| 1.26      | 1.13        | 1.17        | 1.31        | 1.26      | 0.85        | 1.13        | 1.8         | 0.82        | 1.26      | 0.77        |
| 0.19      | 0.45        | 0.47        | 0.07        | 0.19      | 0.35        | 0.15        | 0.05        | 0.26        | 0.37      | 0.71        |
| 1.11      | 0.99        | 1.17        | 1.88        | 1.11      | 1.02        | 1.1         | 0.82        | 0.96        | 1.75      | 1.26        |
| 1.33      | 0.94        | 0.77        | 1.25        | 1.33      | 0.99        | 1.01        | 1.46        | 0.87        | 0.93      | 0.8         |
| 0.99      | 1.12        | 1.11        | 0.63        | 0.99      | 1.35        | 1.03        | 1.69        | 1.43        | 1.07      | 0.88        |
| 1.13      | 1.24        | 1.24        | 0.79        | 1.13      | 1.06        | 0.98        | 0.95        | 0.66        | 1.04      | 1.39        |
| 0.1       | 0.61        | 0.75        | 0.86        | 0.1       | 1.53        | 1.31        | 7           | 0.43        | 1.17      | 1.2         |
| 0.96      | 1.2         | 0.55        | 1.29        | 0.96      | 1.13        | 0.62        | 0.71        | 1.19        | 1.07      | 8.37        |
| 1.87      | 1.03        | 1.17        | 0.51        | 1.87      | 1.36        | 0.74        | 5.79        | 1.02        | 1.1       | 0.8         |
| 3.15      | 2.02        | 1.55        | 0.64        | 3.15      | 0.77        | 0.86        | 1.07        | 1.38        | 0.98      | 1.45        |
| 1.32      | 0.94        | 0.71        | 0.99        | 1.32      | 1.04        | 0.95        | 20.64       | 0.9         | 0.9       | 1.1         |
| 0.95      | 0.95        | 1.05        | 0.93        | 0.95      | 1.28        | 0.71        | 0           | 1.27        | 1.72      | 1.03        |
| 0.63      | 1.15        | 1.22        | 1.03        | 0.63      | 2.72        | 0.79        | 0.06        | 0.98        | 0.55      | 1.89        |
| 1.11      | 0.9         | 0.89        | 0.9         | 1.11      | 0.96        | 1.08        | 1.05        | 1.07        | 1.22      | 0.94        |
| 1.93      | 0.7         | 1.12        | 1.31        | 1.93      | 0.78        | 1.05        | 4.08        | 0.56        | 1.2       | 0.9         |
| 6.62      | 2.18        | 1.67        | 2.1         | 6.62      | 0.72        | 0.62        | 0.38        | 2.55        | 0.88      | 1.03        |
| 0.15      | 0.7         | 1.78        | 1.5         | 0.15      | 2.16        | 0.71        | 63.41       | 1.02        | 1.16      | 0.4         |
| 0.73      | 1.31        | 1.1         | 0.82        | 0.73      | 0.88        | 0.82        | 1.24        | 2.2         | 1.27      | 1.03        |

|      |      |      |      |      |      |      |       |       |      |      |
|------|------|------|------|------|------|------|-------|-------|------|------|
| 0.56 | 0.99 | 0.94 | 0.94 | 0.56 | 0.89 | 0.78 | 0.49  | 1.68  | 1.16 | 0.79 |
| 1.38 | 1.54 | 1.12 | 3.63 | 1.38 | 3.92 | 3.49 | 0.18  | 3.13  | 2.89 | 0.53 |
| 1.07 | 0.89 | 1.33 | 1.08 | 1.07 | 0.96 | 1.08 | 1.04  | 1.07  | 1.06 | 1    |
| 1.27 | 0.98 | 0.89 | 1.05 | 1.27 | 0.55 | 1.52 | 0.26  | 2.48  | 0.83 | 0.31 |
| 16   | 2.04 | 0.85 | 0.82 | 16   | 1.32 | 1.38 | 4     | 21    | 0.78 | 0.71 |
| 1.65 | 1.08 | 0.54 | 1.48 | 1.65 | 0.39 | 0.87 | 0.66  | 1.44  | 0.83 | 2.58 |
| 0.57 | 0.69 | 0.66 | 0.96 | 0.57 | 1.3  | 0.89 | 11.14 | 1.83  | 1.01 | 0.32 |
| 0.88 | 0.84 | 0.84 | 0.81 | 0.88 | 0.94 | 1.18 | 2.5   | 0.91  | 1.08 | 1.05 |
| 1.24 | 0.78 | 1.14 | 1.07 | 1.24 | 1.26 | 1.06 | 0.98  | 0.86  | 0.73 | 0.82 |
| 1.01 | 1.55 | 0.79 | 1.71 | 1.01 | 0.99 | 0.65 | 0.12  | 0.35  | 0.8  | 2.14 |
| 2.01 | 1.28 | 1.09 | 1.04 | 2.01 | 1.19 | 0.92 | 1.83  | 0.92  | 0.76 | 2.8  |
| 0.95 | 1.15 | 1.29 | 0.85 | 0.95 | 1.08 | 1.15 | 0.35  | 1.1   | 1.24 | 0.78 |
| 0.26 | 1.62 | 1.06 | 1.5  | 0.26 | 1.21 | 0.99 | 1.35  | 1.49  | 1.01 | 1.59 |
| 2.55 | 1.09 | 0.87 | 1.86 | 2.55 | 1.83 | 0.88 | 2.6   | 0.56  | 0.76 | 2.86 |
| 0.41 | 1.25 | 0.95 | 1.49 | 0.41 | 1    | 1.02 | 1.32  | 1.35  | 1.1  | 1.53 |
| 1.09 | 1.2  | 1.09 | 1.11 | 1.09 | 1.16 | 0.91 | 9.73  | 0.95  | 0.93 | 2.83 |
| 0.97 | 1.01 | 1.02 | 1.05 | 0.97 | 1.14 | 1.06 | 1.06  | 0.96  | 1.02 | 1.08 |
| 0.81 | 1    | 1.13 | 0.78 | 0.81 | 1.41 | 1.05 | 0.49  | 0.8   | 1.07 | 1.36 |
| 0.86 | 1    | 1.04 | 0.98 | 0.86 | 1.06 | 1.05 | 0.79  | 1.02  | 0.93 | 1.05 |
| 0.69 | 1.14 | 0.98 | 1.36 | 0.69 | 0.88 | 0.77 | 0.17  | 1.63  | 0.88 | 0.77 |
| 0.96 | 0.78 | 0.82 | 0.87 | 0.96 | 0.99 | 1.11 | 0.87  | 0.76  | 0.97 | 0.74 |
| 1.05 | 0.88 | 1.22 | 0.53 | 1.05 | 0.91 | 1.19 | 0.98  | 1.69  | 0.94 | 1.21 |
| 1.09 | 0.88 | 1.05 | 1.42 | 1.09 | 1.12 | 0.83 | 1.68  | 1.12  | 1.08 | 1.09 |
| 0.81 | 1.37 | 1.12 | 1.64 | 0.81 | 1.33 | 1.76 | 1.08  | 0.96  | 0.84 | 4.23 |
| 0.35 | 0.81 | 1.08 | 0.64 | 0.35 | 1.53 | 1.1  | 4.12  | 8.76  | 1.24 | 0.58 |
| 1.48 | 1.27 | 1.42 | 0.91 | 1.48 | 0.97 | 1.28 | 0.2   | 12.57 | 1.14 | 0.57 |
| 0.93 | 1.93 | 0.96 | 1.06 | 0.93 | 1.59 | 1.38 | 4.83  | 5.55  | 1.52 | 1.32 |
| 1.99 | 1.04 | 0.83 | 1.35 | 1.99 | 1.38 | 1.19 | 1.43  | 0.8   | 1.34 | 2.78 |
| 0.25 | 1.06 | 1.16 | 0.72 | 0.25 | 1.07 | 0.95 | 1.01  | 0.95  | 0.9  | 1.1  |
| 0.41 | 1.31 | 1.13 | 2.15 | 0.41 | 1.01 | 0.97 | 1.33  | 1.39  | 1.15 | 0.91 |
| 0.73 | 1.04 | 0.84 | 1.37 | 0.73 | 0.73 | 2.74 | 0.75  | 0.62  | 0.69 | 3.68 |
| 0.79 | 0.85 | 1.17 | 1.39 | 0.79 | 0.69 | 0.94 | 1.09  | 0.98  | 0.98 | 1.32 |
| 1.14 | 0.97 | 1.03 | 0.99 | 1.14 | 0.87 | 0.91 | 3.78  | 0.93  | 1    | 2.64 |

|      |      |      |      |      |      |      |        |       |      |       |
|------|------|------|------|------|------|------|--------|-------|------|-------|
| 0.91 | 1.12 | 0.97 | 1.67 | 0.91 | 1    | 1.11 | 0.14   | 0.75  | 1    | 1.05  |
| 1.49 | 1.37 | 1.19 | 1.41 | 1.49 | 1.18 | 0.86 | 2.08   | 2.38  | 1    | 0.94  |
| 0.89 | 1.08 | 0.93 | 1.25 | 0.89 | 1.07 | 0.98 | 251.75 | 1.08  | 0.94 | 0.89  |
| 0.87 | 1.11 | 0.95 | 0.95 | 0.87 | 1.19 | 1    | 2.83   | 1.24  | 1.57 | 2.76  |
| 0.85 | 1    | 0.94 | 1.27 | 0.85 | 1.04 | 0.96 | 1.56   | 1.09  | 0.86 | 1.17  |
| 1.35 | 0.71 | 1.37 | 1.46 | 1.35 | 0.97 | 1.28 | 0.82   | 0.83  | 1.22 | 0.9   |
| 1.65 | 1.16 | 1.27 | 2.9  | 1.65 | 1.55 | 0.85 | 0.67   | 1.22  | 1.35 | 0.65  |
| 0.98 | 1.38 | 1.66 | 0.95 | 0.98 | 1    | 1.05 | 0.66   | 1.43  | 1.35 | 0.92  |
| 0.92 | 1.06 | 1.91 | 2.06 | 0.92 | 1.5  | 0.88 | 1.63   | 2.51  | 1.06 | 3.41  |
| 1.12 | 1    | 1.27 | 1.23 | 1.12 | 0.64 | 0.81 | 1.52   | 1.15  | 0.9  | 0.92  |
| 1.34 | 0.85 | 1.01 | 0.84 | 1.34 | 0.95 | 1.04 | 10.38  | 1.48  | 0.93 | 0.91  |
| 0.9  | 1.11 | 1.1  | 1.07 | 0.9  | 1.07 | 1.08 | 1.06   | 0.93  | 1.06 | 11.73 |
| 1.19 | 1.3  | 1.19 | 1.28 | 1.19 | 1.03 | 0.83 | 1.41   | 1.33  | 0.8  | 1.23  |
| 1.01 | 0.9  | 1.49 | 0.69 | 1.01 | 1.38 | 0.81 | 0.74   | 1.61  | 0.99 | 1.45  |
| 0.42 | 1.02 | 1.03 | 1.1  | 0.42 | 1.04 | 1.31 | 2.67   | 1.34  | 1.38 | 1.03  |
| 4.36 | 1.04 | 2.34 | 8    | 4.36 | 9.01 | 12.5 | 2.37   | 22.14 | 0.05 | 2.12  |
| 1.36 | 1.3  | 1.05 | 9.07 | 1.36 | 1.2  | 1.07 | 0.9    | 0.64  | 1.06 | 1.45  |
| 0.32 | 0.87 | 0.73 | 0.18 | 0.32 | 0.87 | 1.95 | 0.1    | 0.89  | 0.78 | 1.2   |
| 0.9  | 1.04 | 0.95 | 1    | 0.9  | 0.7  | 0.93 | 1.63   | 1.01  | 0.88 | 0.78  |
| 0.9  | 0.88 | 0.99 | 1.43 | 0.9  | 1.22 | 0.99 | 1.19   | 0.98  | 0.81 | 0.65  |
| 0.72 | 2.58 | 0.75 | 2.05 | 0.72 | 3.02 | 0.95 | 279    | 1     | 1.3  | 8.44  |
| 0.91 | 1.1  | 1.26 | 1.22 | 0.91 | 1.32 | 1.11 | 4.57   | 0.95  | 1.09 | 6.51  |
| 0.11 | 0.82 | 1.05 | 0.44 | 0.11 | 0.93 | 1.01 | 0.53   | 1.47  | 0.67 | 0.57  |
| 0.97 | 0.88 | 1.28 | 1.22 | 0.97 | 0.98 | 0.92 | 0.85   | 1.17  | 1.47 | 0.46  |
| 1.37 | 1.19 | 0.87 | 1    | 1.37 | 0.93 | 1.02 | 1.12   | 0.86  | 1.08 | 1.02  |
| 0.91 | 0.97 | 0.85 | 1.28 | 0.91 | 0.74 | 0.97 | 1.36   | 1.07  | 1    | 1     |
| 1.03 | 1.13 | 1.12 | 0.93 | 1.03 | 0.99 | 1.02 | 1.04   | 1.29  | 1.17 | 0.78  |
| 1.09 | 1.31 | 1.13 | 1.37 | 1.09 | 1.38 | 0.99 | 0.51   | 0.96  | 1.22 | 0.84  |
| 1.05 | 1.11 | 0.95 | 0.9  | 1.05 | 1.06 | 0.95 | 1.49   | 1.33  | 0.82 | 0.93  |
| 0.94 | 0.95 | 1    | 0.99 | 0.94 | 1.01 | 1.02 | 0.94   | 0.95  | 1.03 | 1     |
| 1.22 | 1.29 | 1.19 | 0.95 | 1.22 | 1.05 | 1    | 0.78   | 1.05  | 1.21 | 1.38  |
| 0.56 | 1.05 | 0.74 | 3.26 | 0.56 | 0.86 | 0.77 | 2.92   | 0.5   | 0.84 | 2.6   |
| 1.08 | 1.01 | 1.18 | 1.29 | 1.08 | 1.08 | 0.81 | 2      | 0.95  | 0.94 | 0.79  |

|      |      |      |      |      |      |      |       |      |      |      |
|------|------|------|------|------|------|------|-------|------|------|------|
| 0.94 | 1.17 | 1.01 | 0.82 | 0.94 | 0.61 | 0.99 | 1.34  | 0.89 | 1.05 | 1.03 |
| 0.86 | 0.86 | 1.33 | 1.1  | 0.86 | 1.01 | 1.07 | 1.67  | 1.14 | 1.08 | 0.74 |
| 1.42 | 0.98 | 1.22 | 1.27 | 1.42 | 0.92 | 0.89 | 0.98  | 1.09 | 1.23 | 1.1  |
| 0.96 | 0.96 | 1.48 | 2.33 | 0.96 | 1.12 | 0.75 | 1.31  | 2.44 | 1.07 | 3.53 |
| 1    | 0.84 | 1.27 | 1.38 | 1    | 0.62 | 1.55 | 1.47  | 0.83 | 1.38 | 1.28 |
| 0.73 | 0.84 | 0.78 | 0.32 | 0.73 | 1.2  | 0.58 | 0.85  | 2.11 | 1.7  | 0.34 |
| 1.13 | 1.46 | 1.13 | 0.99 | 1.13 | 0.87 | 0.83 | 1.73  | 1.12 | 1.03 | 0.86 |
| 1.12 | 1.03 | 0.75 | 1.63 | 1.12 | 1.08 | 1.13 | 4.3   | 0.61 | 0.97 | 1.23 |
| 0.75 | 1    | 0.98 | 1.15 | 0.75 | 0.8  | 0.68 | 0.73  | 0.84 | 0.78 | 0.79 |
| 1.33 | 1.19 | 1    | 2.67 | 1.33 | 1.48 | 1.08 | 0.67  | 0.91 | 0.74 | 1.04 |
| 1.43 | 0.94 | 1.12 | 0.97 | 1.43 | 0.98 | 1.43 | 3.03  | 1.03 | 1.01 | 1.18 |
| 1.05 | 0.87 | 0.87 | 0.75 | 1.05 | 1.17 | 1.02 | 0.98  | 1.08 | 0.92 | 1.25 |
| 0.79 | 1.05 | 1.27 | 0.89 | 0.79 | 1.21 | 1.08 | 1.5   | 2.18 | 0.71 | 0.71 |
| 1.16 | 1.04 | 1.41 | 1.18 | 1.16 | 0.64 | 1.15 | 0.52  | 2.67 | 1.1  | 0.53 |
| 1.08 | 1.03 | 1.03 | 0.96 | 1.08 | 1.09 | 1    | 1.09  | 0.84 | 0.93 | 0.55 |
| 1.14 | 1.08 | 1.19 | 0.8  | 1.14 | 1.08 | 1.06 | 13.72 | 0.8  | 1.27 | 1.3  |
| 1.26 | 0.89 | 1.03 | 0.93 | 1.26 | 0.93 | 0.94 | 0.7   | 1.27 | 0.89 | 1.1  |
| 0.91 | 1.18 | 1.02 | 0.95 | 0.91 | 1.4  | 1.02 | 3.63  | 1.53 | 2.27 | 3.21 |
| 1.14 | 1.01 | 1.05 | 1    | 1.14 | 1.1  | 0.9  | 1.39  | 0.93 | 1.07 | 0.85 |
| 0.7  | 0.99 | 1.89 | 1.26 | 0.7  | 0.92 | 1.23 | 0.07  | 0.94 | 1.51 | 1.06 |
| 0.7  | 0.95 | 0.92 | 1.11 | 0.7  | 0.86 | 0.99 | 1.2   | 1.28 | 1.16 | 0.84 |
| 1.09 | 0.87 | 0.85 | 0.88 | 1.09 | 0.62 | 0.91 | 0.25  | 1.08 | 0.99 | 1.13 |
| 1.03 | 0.89 | 0.96 | 1.15 | 1.03 | 1.13 | 0.93 | 1.04  | 0.97 | 1.08 | 1.39 |
| 1.63 | 1.14 | 1.42 | 1.24 | 1.63 | 0.81 | 0.95 | 0.85  | 0.4  | 1.35 | 0.87 |
| 1.31 | 0.82 | 1.06 | 1.05 | 1.31 | 0.84 | 1.03 | 7.96  | 1.14 | 1.27 | 1.04 |
| 1.21 | 0.96 | 0.91 | 1.26 | 1.21 | 0.98 | 0.84 | 0.92  | 1.37 | 0.94 | 1.49 |
| 1.03 | 1.13 | 0.69 | 0.98 | 1.03 | 1.07 | 1.12 | 0.97  | 0.91 | 1.12 | 1.2  |
| 1.32 | 0.73 | 1.09 | 1    | 1.32 | 1.46 | 0.87 | 2.79  | 0.8  | 0.68 | 0.85 |
| 0.52 | 0.97 | 1.07 | 0.69 | 0.52 | 1.29 | 1.18 | 1.24  | 1.76 | 1.03 | 1.07 |
| 0.94 | 1.02 | 1    | 1.21 | 0.94 | 1.71 | 0.96 | 1     | 0.93 | 0.89 | 0.92 |
| 5.78 | 1.19 | 0.98 | 0.45 | 5.78 | 0.87 | 1.02 | 1.61  | 1.08 | 0.95 | 0.95 |
| 1.49 | 1.37 | 1.19 | 1.41 | 1.49 | 1.18 | 0.86 | 2.08  | 2.38 | 1    | 0.94 |
| 0.97 | 1.24 | 0.99 | 1.59 | 0.97 | 0.85 | 1    | 0.93  | 1.35 | 1.11 | 0.81 |

|      |      |      |      |      |      |      |      |      |      |       |
|------|------|------|------|------|------|------|------|------|------|-------|
| 1.58 | 0.96 | 0.98 | 1.09 | 1.58 | 0.8  | 1.11 | 3.07 | 1.08 | 1.05 | 0.36  |
| 0.93 | 1.22 | 1.43 | 1.45 | 0.93 | 0.92 | 0.97 | 0.96 | 1.1  | 0.99 | 0.84  |
| 1.09 | 1.04 | 0.83 | 1.28 | 1.09 | 0.84 | 1.2  | 0.52 | 0.75 | 1.28 | 0.7   |
| 1.28 | 0.87 | 0.89 | 1.48 | 1.28 | 0.87 | 0.98 | 1.77 | 1.02 | 0.84 | 3.24  |
| 1.35 | 0.87 | 1.01 | 0.87 | 1.35 | 1.1  | 1.06 | 6.35 | 0.91 | 0.93 | 0.82  |
| 0.75 | 0.88 | 1.06 | 1.15 | 0.75 | 0.85 | 0.99 | 1.31 | 1.01 | 1.14 | 1.01  |
| 0.89 | 0.91 | 0.89 | 1.03 | 0.89 | 1    | 1.02 | 0.92 | 1.22 | 0.93 | 0.86  |
| 0.98 | 0.88 | 0.73 | 0.89 | 0.98 | 0.84 | 1.02 | 3.52 | 0.94 | 0.78 | 0.8   |
| 1.3  | 1.08 | 1.11 | 1.27 | 1.3  | 1.3  | 1.17 | 2.27 | 1.08 | 1.12 | 1.33  |
| 1.24 | 0.96 | 0.86 | 1.48 | 1.24 | 1.1  | 0.86 | 1.5  | 1    | 0.93 | 0.84  |
| 0.96 | 0.97 | 1.31 | 1.1  | 0.96 | 0.73 | 1.13 | 0.51 | 1.56 | 1.09 | 0.47  |
| 1.17 | 0.87 | 0.85 | 1.32 | 1.17 | 0.91 | 1.09 | 1.28 | 1.06 | 0.92 | 0.92  |
| 0.88 | 1.17 | 1.15 | 1.11 | 0.88 | 1.17 | 1.03 | 2.18 | 1.08 | 2.36 | 2.59  |
| 0.88 | 0.9  | 0.84 | 0.79 | 0.88 | 1.22 | 0.9  | 2.19 | 0.79 | 1.13 | 0.67  |
| 0.29 | 1.32 | 0.74 | 0.86 | 0.29 | 1.11 | 0.8  | 1.87 | 0.4  | 0.8  | 1.03  |
| 1.01 | 0.96 | 1.08 | 1.11 | 1.01 | 1.12 | 0.94 | 0.8  | 0.96 | 0.98 | 1     |
| 0.95 | 0.93 | 1.05 | 1.15 | 0.95 | 1.08 | 1.02 | 1.06 | 0.85 | 1.14 | 1.58  |
| 1.12 | 1.28 | 1.31 | 1.42 | 1.12 | 1.32 | 1.22 | 7.66 | 1.87 | 1.18 | 0.72  |
| 3.3  | 1.03 | 0.96 | 0.79 | 3.3  | 1.03 | 1.03 | 2.43 | 1.09 | 1.06 | 0.74  |
| 1.5  | 1.1  | 0.81 | 0.84 | 1.5  | 1.05 | 0.98 | 1.15 | 0.93 | 1.06 | 0.97  |
| 1.02 | 0.97 | 1.1  | 1.26 | 1.02 | 1.14 | 1.01 | 0.95 | 1.44 | 0.73 | 1.35  |
| 1.41 | 1.02 | 0.89 | 0.63 | 1.41 | 1.33 | 1.17 | 0.96 | 0.78 | 0.61 | 1.23  |
| 1.13 | 0.94 | 1.02 | 1.17 | 1.13 | 1.06 | 1.06 | 0.86 | 0.89 | 1.07 | 1.16  |
| 1.01 | 1.03 | 0.9  | 1.01 | 1.01 | 1.18 | 0.81 | 0.34 | 0.73 | 1.19 | 0.27  |
| 1    | 0.91 | 0.91 | 1.1  | 1    | 0.89 | 0.98 | 1.81 | 0.77 | 0.97 | 0.93  |
| 1.09 | 1.1  | 0.78 | 0.92 | 1.09 | 1    | 1.04 | 1.1  | 0.99 | 1.04 | 0.78  |
| 1.31 | 1.21 | 1.53 | 1.43 | 1.31 | 1.16 | 1    | 1.98 | 0.82 | 1.43 | 0.66  |
| 0.9  | 1.14 | 1.21 | 0.87 | 0.9  | 1.08 | 0.88 | 0.99 | 1.33 | 0.98 | 1.37  |
| 1.01 | 0.99 | 0.84 | 1.16 | 1.01 | 1.05 | 1    | 1.67 | 0.99 | 1.03 | 3.08  |
| 0.83 | 0.98 | 0.81 | 0.83 | 0.83 | 1.02 | 1.07 | 0.52 | 0.9  | 0.99 | 1.12  |
| 1.24 | 0.91 | 0.94 | 1.08 | 1.24 | 1.03 | 1.11 | 1.09 | 1.04 | 0.76 | 0.98  |
| 0.95 | 0.99 | 1.09 | 1.42 | 0.95 | 0.91 | 1    | 1    | 1.07 | 0.99 | 13.94 |
| 1.06 | 1.02 | 1.09 | 1.14 | 1.06 | 1.06 | 1.01 | 0.84 | 1.06 | 0.98 | 0.98  |

|      |      |      |      |      |      |      |        |      |      |      |
|------|------|------|------|------|------|------|--------|------|------|------|
| 0.81 | 1.14 | 1.67 | 1.63 | 0.81 | 2.06 | 0.97 | 1.65   | 2.1  | 1.16 | 3.9  |
| 1.22 | 1.02 | 1.08 | 1.24 | 1.22 | 1.08 | 1.04 | 1.73   | 1.09 | 0.77 | 1.05 |
| 0.97 | 0.97 | 0.98 | 0.96 | 0.97 | 1.04 | 0.96 | 0.84   | 1.03 | 1.25 | 0.97 |
| 3.63 | 1.04 | 0.84 | 1.57 | 3.63 | 0.94 | 1.04 | 0.55   | 0.51 | 1.04 | 1    |
| 0.93 | 1.08 | 0.75 | 0.52 | 0.93 | 0.71 | 1.23 | 1.04   | 0.86 | 1.09 | 0.78 |
| 1.62 | 0.99 | 0.96 | 0.9  | 1.62 | 0.96 | 0.96 | 1.46   | 0.99 | 0.94 | 1.01 |
| 0.54 | 1.03 | 0.96 | 1.02 | 0.54 | 0.93 | 0.76 | 0.57   | 1.68 | 1.17 | 0.78 |
| 0.9  | 1.07 | 1.05 | 1.2  | 0.9  | 0.93 | 1.03 | 2.47   | 1.01 | 1    | 1.22 |
| 0.91 | 1.09 | 1    | 0.88 | 0.91 | 1.04 | 1.06 | 0.53   | 1.1  | 1.05 | 0.66 |
| 0.61 | 1.06 | 1.04 | 0.81 | 0.61 | 0.92 | 0.76 | 2.12   | 1.41 | 1.14 | 1.02 |
| 1.3  | 0.93 | 1.39 | 0.84 | 1.3  | 1.41 | 0.96 | 0.81   | 1.13 | 1.21 | 1.33 |
| 1.82 | 0.99 | 1.4  | 1.5  | 1.82 | 1.7  | 0.93 | 2.12   | 0.73 | 1.45 | 0.85 |
| 0.81 | 0.75 | 1.12 | 1.02 | 0.81 | 0.86 | 0.9  | 1.02   | 1.07 | 0.79 | 1    |
| 0.95 | 1.11 | 0.96 | 0.95 | 0.95 | 0.91 | 1.06 | 5.69   | 0.92 | 0.87 | 0.82 |
| 1.4  | 0.96 | 0.85 | 1.36 | 1.4  | 0.94 | 1.05 | 2.01   | 0.94 | 0.91 | 2.1  |
| 1.39 | 1.06 | 0.89 | 1.35 | 1.39 | 0.99 | 0.87 | 0.93   | 1.05 | 1.01 | 0.5  |
| 0.91 | 1.05 | 1.3  | 1.07 | 0.91 | 1.01 | 0.99 | 1.75   | 1.01 | 1.1  | 1.19 |
| 0.97 | 1.01 | 0.86 | 0.77 | 0.97 | 1    | 1    | 1.13   | 1.13 | 0.9  | 0.91 |
| 0.69 | 0.75 | 1.05 | 0.91 | 0.69 | 0.99 | 1.24 | 0.92   | 1.56 | 0.86 | 2.32 |
| 0.88 | 1.03 | 1.12 | 0.84 | 0.88 | 0.79 | 0.9  | 1.08   | 0.73 | 0.94 | 0.89 |
| 0.53 | 1.06 | 1.28 | 0.97 | 0.53 | 0.93 | 1.01 | 0.9    | 1.03 | 1.12 | 0.73 |
| 0.72 | 0.71 | 0.82 | 0.79 | 0.72 | 0.69 | 1.94 | 709.31 | 1.27 | 1.6  | 0.16 |
| 0.89 | 1.08 | 0.99 | 0.96 | 0.89 | 1.11 | 0.95 | 6.58   | 0.93 | 1.09 | 0.75 |
| 0.87 | 1.02 | 3.13 | 1.44 | 0.87 | 0.91 | 1.01 | 1.43   | 1.69 | 1.11 | 4.07 |
| 1.03 | 1.21 | 0.92 | 0.98 | 1.03 | 1.34 | 0.93 | 2.31   | 0.9  | 0.9  | 1.35 |
| 2.78 | 0.54 | 0.48 | 2.5  | 2.78 | 2.64 | 0.82 | 0.22   | 1.04 | 1.36 | 8.09 |
| 1.17 | 1.04 | 0.93 | 1.36 | 1.17 | 0.97 | 0.99 | 1.04   | 1.06 | 1.1  | 1.46 |
| 1.11 | 0.94 | 1.1  | 1.09 | 1.11 | 1.03 | 1.04 | 0.68   | 1.12 | 1.05 | 1.02 |
| 0.95 | 0.89 | 0.99 | 1.07 | 0.95 | 0.93 | 1.01 | 0.83   | 0.94 | 0.92 | 1.03 |
| 1.06 | 0.82 | 1    | 0.98 | 1.06 | 0.93 | 1.06 | 1.17   | 1.2  | 0.81 | 1.1  |
| 0.84 | 0.9  | 1.2  | 1.38 | 0.84 | 0.8  | 1.18 | 1.16   | 0.99 | 1.25 | 1.12 |
| 0.89 | 0.94 | 0.87 | 0.9  | 0.89 | 0.91 | 1.14 | 1.08   | 0.97 | 0.97 | 0.88 |
| 0.86 | 0.86 | 0.78 | 1.58 | 0.86 | 1.31 | 1.08 | 5.57   | 0.69 | 1.03 | 1.03 |



|      |      |      |      |      |      |      |      |      |      |      |
|------|------|------|------|------|------|------|------|------|------|------|
| 0.83 | 1.06 | 0.88 | 1.23 | 0.83 | 2.03 | 0.96 | 0.11 | 0.96 | 1.12 | 1.09 |
| 1.12 | 0.95 | 1.05 | 0.82 | 1.12 | 1.07 | 1.05 | 1.4  | 1.14 | 0.74 | 1.5  |
| 1.06 | 0.75 | 1.02 | 1.02 | 1.06 | 1    | 1.16 | 1.05 | 1.02 | 0.85 | 1.08 |
| 0.66 | 0.75 | 1.06 | 0.88 | 0.66 | 1.05 | 0.74 | 1.33 | 2.21 | 0.93 | 0.73 |
| 0.85 | 1.04 | 1.62 | 1.32 | 0.85 | 1.13 | 1.11 | 1.83 | 1.5  | 0.99 | 0.85 |
| 0.64 | 0.74 | 0.88 | 0.77 | 0.64 | 0.93 | 1.04 | 2.28 | 0.88 | 0.95 | 1.98 |
| 0.83 | 0.87 | 0.95 | 0.86 | 0.83 | 1.29 | 0.85 | 1.1  | 0.76 | 0.94 | 0.97 |
| 1.13 | 1.05 | 0.85 | 1.07 | 1.13 | 0.99 | 0.84 | 0.49 | 1.21 | 1.1  | 0.72 |
| 0.99 | 0.97 | 2.14 | 2.57 | 0.99 | 1.18 | 0.94 | 1.64 | 1.8  | 1.14 | 3.12 |
| 0.98 | 1.26 | 0.79 | 2.53 | 0.98 | 0.68 | 0.86 | 0.56 | 0.83 | 0.94 | 0.85 |
| 1.26 | 1.52 | 0.82 | 0.85 | 1.26 | 0.82 | 0.95 | 1.13 | 1.02 | 0.98 | 0.74 |
| 0.82 | 0.95 | 0.89 | 1.03 | 0.82 | 1.04 | 1.03 | 0.39 | 0.9  | 0.81 | 0.62 |
| 1    | 1.18 | 0.81 | 1.35 | 1    | 1.07 | 1.01 | 1.07 | 0.66 | 1.36 | 0.93 |
| 4.58 | 1.18 | 1.06 | 0.4  | 4.58 | 0.91 | 1.04 | 5.92 | 1.11 | 0.96 | 0.86 |
| 1.06 | 0.69 | 0.83 | 0.9  | 1.06 | 0.89 | 0.92 | 1.22 | 1.1  | 0.92 | 0.97 |
| 0.81 | 0.62 | 1.03 | 0.59 | 0.81 | 1.28 | 1.02 | 1.69 | 1.02 | 1.3  | 1.2  |
| 0.6  | 1.07 | 0.95 | 1.09 | 0.6  | 0.79 | 1.07 | 0.3  | 1.05 | 1.34 | 0.74 |
| 1.14 | 0.94 | 0.81 | 1.17 | 1.14 | 0.95 | 0.92 | 0.55 | 1.05 | 1.13 | 1.01 |
| 1.4  | 1.14 | 0.97 | 1.2  | 1.4  | 0.93 | 0.79 | 0.3  | 0.63 | 1.02 | 2.72 |
| 1.14 | 0.79 | 1.28 | 0.23 | 1.14 | 1.23 | 0.74 | 0.03 | 0.25 | 1.4  | 0.9  |
| 0.75 | 0.91 | 0.91 | 1.07 | 0.75 | 1.15 | 0.91 | 1.16 | 1.22 | 1.14 | 1.78 |
| 0.6  | 1.01 | 0.99 | 0.83 | 0.6  | 0.89 | 0.78 | 1.27 | 1.54 | 1.15 | 0.91 |
| 1.07 | 1.01 | 1.71 | 0.83 | 1.07 | 0.73 | 1.63 | 0.81 | 3.02 | 0.84 | 1.05 |
| 0.59 | 1.35 | 0.91 | 3.08 | 0.59 | 1.02 | 0.96 | 0    | 1.05 | 0.76 | 1.42 |
| 0.89 | 0.96 | 0.93 | 1.15 | 0.89 | 1.18 | 0.99 | 1.04 | 0.81 | 1.15 | 1    |
| 1.11 | 1.05 | 0.78 | 1.32 | 1.11 | 1.04 | 1.1  | 0.99 | 1.09 | 1.14 | 0.83 |
| 1.19 | 1    | 0.9  | 1.04 | 1.19 | 0.56 | 0.93 | 0.86 | 0.8  | 1.46 | 0.59 |
| 1.19 | 1.2  | 0.99 | 1.25 | 1.19 | 1.11 | 0.87 | 0.2  | 0.75 | 1.11 | 0.94 |
| 0.61 | 1.52 | 0.98 | 1.02 | 0.61 | 0.8  | 1.13 | 0.85 | 2.05 | 1.19 | 0.79 |
| 0.5  | 0.47 | 0.42 | 0.79 | 0.5  | 2.61 | 1.16 | 1.13 | 1.62 | 0.14 | 1.66 |
| 1.41 | 0.87 | 1.47 | 0.68 | 1.41 | 0.97 | 0.92 | 2    | 0.87 | 0.73 | 1.83 |
| 0.98 | 0.94 | 1.18 | 0.82 | 0.98 | 0.57 | 0.99 | 0.93 | 0.3  | 0.63 | 0.93 |
| 0.64 | 3.12 | 1.61 | 1.67 | 0.64 | 1.85 | 0.98 | 2.11 | 1.2  | 1.84 | 1.13 |

|      |       |      |      |      |      |      |       |      |      |      |
|------|-------|------|------|------|------|------|-------|------|------|------|
| 0.91 | 1.03  | 0.99 | 1.1  | 0.91 | 0.86 | 0.96 | 4.12  | 0.99 | 0.26 | 1.34 |
| 0.66 | 0.94  | 1.16 | 1.27 | 0.66 | 0.94 | 1.01 | 0.75  | 1.13 | 1.16 | 0.97 |
| 5.4  | 1.34  | 1.06 | 2.16 | 5.4  | 0.52 | 2.13 | 2.87  | 0.8  | 0.71 | 0.94 |
| 0.71 | 0.82  | 0.74 | 1.54 | 0.71 | 0.65 | 0.93 | 0.23  | 0.28 | 1.35 | 1.05 |
| 0.52 | 0.99  | 0.96 | 1.08 | 0.52 | 0.92 | 0.98 | 56.41 | 1.57 | 0.84 | 0.92 |
| 1.08 | 0.98  | 1.23 | 1.03 | 1.08 | 1.72 | 1.07 | 2.31  | 1.08 | 1.08 | 1.1  |
| 0.94 | 1.02  | 1.03 | 1.12 | 0.94 | 1.27 | 1.05 | 0.89  | 1    | 1.03 | 1.1  |
| 1.01 | 1.05  | 0.92 | 0.98 | 1.01 | 0.79 | 1.04 | 2.26  | 0.91 | 1.01 | 0.95 |
| 0.94 | 0.88  | 0.92 | 1.43 | 0.94 | 1.28 | 1.01 | 1.11  | 0.83 | 1.11 | 1.03 |
| 1.2  | 1.08  | 1.11 | 1.01 | 1.2  | 1.4  | 1.03 | 1.06  | 1.65 | 1.15 | 0.66 |
| 1.26 | 1.08  | 1.17 | 1.15 | 1.26 | 1.31 | 1    | 2.73  | 0.99 | 1.04 | 1.52 |
| 6.6  | 13.57 | 5.27 | 6.89 | 6.6  | 1.6  | 0.77 | 0.29  | 3.78 | 0.09 | 0.51 |
| 1.01 | 1.14  | 1.05 | 1.21 | 1.01 | 1.37 | 1.07 | 0.87  | 0.96 | 1.23 | 0.97 |
| 0.52 | 0.87  | 1.21 | 0.66 | 0.52 | 1.05 | 1.18 | 26.12 | 0.33 | 1.17 | 0.69 |

| 211110_s_at | 202092_s_at | 204798_at | 211012_s_at | 202431_s_at | 209054_s_at | 214794_at | 210004_at | 202778_s_at | 204602_at | 209341_s_at |
|-------------|-------------|-----------|-------------|-------------|-------------|-----------|-----------|-------------|-----------|-------------|
| 0.89        | 1.16        | 1.93      | 1.39        | 1.04        | 0.88        | 1.01      | 0.64      | 0.86        | 1.4       | 1.02        |
| 0.76        | 0.97        | 1.54      | 0.76        | 0.41        | 0.71        | 0.81      | 1.17      | 1.01        | 0.91      | 1.16        |
| 1.68        | 1.04        | 1.06      | 0.65        | 1.13        | 0.88        | 0.96      | 1.59      | 4.32        | 1.41      | 1.85        |
| 1.02        | 0.99        | 1.04      | 1.88        | 1.17        | 0.82        | 1.02      | 1.81      | 0.96        | 0.74      | 1.14        |
| 1.54        | 1.21        | 1.16      | 1.41        | 1.22        | 1.7         | 1.2       | 1.14      | 0.69        | 1.08      | 1.51        |
| 1           | 1.23        | 0.7       | 0.81        | 735.49      | 0.84        | 1.35      | 2.05      | 1.2         | 0.57      | 0.71        |
| 1           | 1.48        | 0.07      | 1.25        | 0.85        | 0.75        | 1.82      | 0.44      | 1.06        | 1.61      | 1.34        |
| 0.96        | 1.16        | 0.9       | 0.99        | 1.08        | 0.94        | 1.02      | 0.58      | 0.92        | 1.43      | 0.95        |
| 0.66        | 1.06        | 0.6       | 1.09        | 0.82        | 0.92        | 0.94      | 0.67      | 0.99        | 4.07      | 1           |
| 268.62      | 1.08        | 0.27      | 7.93        | 1.95        | 0.75        | 1.27      | 5.43      | 0.63        | 1.43      | 0.75        |
| 0.87        | 0.81        | 1.17      | 0.45        | 0.89        | 0.96        | 0.93      | 0.5       | 1.23        | 0.68      | 1.27        |
| 0.22        | 1.22        | 1.25      | 0.68        | 0.97        | 1.37        | 1.03      | 0.26      | 0.87        | 0.91      | 1.1         |
| 1.02        | 0.98        | 0.85      | 0.93        | 1.03        | 0.93        | 1.11      | 0.9       | 0.95        | 0.53      | 1.16        |
| 10.4        | 0.24        | 2.15      | 0.35        | 0.15        | 0.48        | 2.33      | 17.12     | 11.05       | 0.06      | 0.26        |
| 0.7         | 1.98        | 0.85      | 0.66        | 1.71        | 1.31        | 1         | 1.74      | 1.06        | 1.11      | 1.47        |
| 1.12        | 0.99        | 1.76      | 0.68        | 0.92        | 0.92        | 0.81      | 1.16      | 1.13        | 0.49      | 1.21        |
| 1.14        | 1.07        | 2.98      | 1.9         | 0.83        | 1.2         | 0.84      | 1.3       | 0.99        | 1.03      | 1.25        |
| 1.52        | 1.17        | 4.28      | 1.29        | 0.74        | 1           | 0.99      | 11.86     | 1.63        | 0.4       | 1.05        |
| 0.82        | 1.06        | 0.53      | 0.15        | 0.22        | 0.84        | 0.71      | 0.54      | 0.72        | 0.25      | 1.32        |
| 1.2         | 0.98        | 1.27      | 3.92        | 0.74        | 0.59        | 1         | 2.35      | 1.15        | 2.69      | 1.39        |
| 1.67        | 2.49        | 1.26      | 2.3         | 0.49        | 0.79        | 0.65      | 2.07      | 1.21        | 0.81      | 0.49        |
| 10.97       | 1.47        | 2.98      | 3.24        | 0.88        | 0.91        | 0.57      | 9.3       | 0.8         | 2.05      | 0.93        |
| 1.5         | 0.84        | 1.57      | 0.94        | 1.41        | 0.85        | 0.85      | 2.97      | 1.01        | 3.05      | 1.07        |
| 1.42        | 0.75        | 1.07      | 1.57        | 0.75        | 0.69        | 0.81      | 0.52      | 0.85        | 1.89      | 1.21        |
| 0.42        | 1.14        | 0.04      | 7.42        | 6.79        | 1.33        | 0.77      | 8.67      | 0.01        | 94.97     | 1.79        |
| 0.87        | 0.97        | 0.44      | 0.95        | 0.76        | 1.26        | 1.67      | 0.56      | 0.64        | 2.77      | 0.85        |
| 1.14        | 1.12        | 10.86     | 1.22        | 0.76        | 1.04        | 0.97      | 0.69      | 1.4         | 1.01      | 1.14        |
| 3.7         | 2.34        | 1.54      | 24.79       | 1.03        | 0.78        | 1.1       | 1.24      | 0.8         | 4.7       | 0.97        |
| 1.32        | 0.83        | 3.77      | 1.81        | 3.43        | 1.41        | 0.81      | 3.74      | 1.72        | 3.61      | 0.5         |
| 1.11        | 0.9         | 0.91      | 1.18        | 3.16        | 0.88        | 0.87      | Inf       | 1.06        | 2.06      | 0.83        |

|      |      |       |      |        |      |       |       |      |       |      |
|------|------|-------|------|--------|------|-------|-------|------|-------|------|
| 2    | 0.98 | 0.75  | 1.05 | 1.37   | 0.92 | 1.53  | 0.29  | 0.93 | 0.77  | 0.69 |
| 3.1  | 0.97 | 1.25  | 0.96 | 4.73   | 1.54 | 10.02 | 89.53 | 1.52 | 0.95  | 3.19 |
| 1.18 | 0.96 | 0.95  | 2    | 0.71   | 0.99 | 0.77  | 1.79  | 1.18 | 0.78  | 1.26 |
| 1.42 | 0.76 | 6.78  | 0.27 | 0.55   | 2.05 | 1.84  | 0.4   | 0.68 | 0.99  | 0.76 |
| 2.38 | 0.49 | 0.86  | 1.67 | 1.69   | 0.09 | 1.15  | 0.56  | 0.3  | 0.38  | 2.42 |
| 5.49 | 0.78 | 1.55  | 0.44 | 1.53   | 1.27 | 0.92  | 23.91 | 0.62 | 11.11 | 0.78 |
| 0.41 | 0.58 | 1.17  | 0.8  | 0.97   | 0.65 | 0.91  | 0.6   | 0.93 | 0.01  | 0.93 |
| 1.35 | 1.1  | 0.8   | 0.5  | 1.17   | 0.91 | 0.99  | 0.92  | 0.72 | 1.04  | 0.78 |
| 2.33 | 1.39 | 0.37  | 1.65 | 0.55   | 1.27 | 0.88  | 0.16  | 0.9  | 0.78  | 0.89 |
| 0.69 | 1.05 | 0.03  | 3.12 | 0.48   | 0.7  | 0.55  | 9.5   | 1.15 | 0.54  | 1.88 |
| 0.42 | 1.11 | 1.11  | 1.44 | 0.71   | 1.16 | 1.36  | 0.47  | 0.87 | 14.66 | 1.12 |
| 3.39 | 1.02 | 0.99  | 0.98 | 0.47   | 0.97 | 1.11  | 0.83  | 1.07 | 0.98  | 0.95 |
| 0.42 | 0.86 | 1.06  | 0.69 | 0.44   | 0.36 | 0.47  | 0.63  | 2.59 | 0.48  | 1.41 |
| 4.21 | 1.13 | 1.51  | 0.75 | 2.84   | 1.19 | 0.8   | 1.84  | 1.78 | 2.66  | 1.49 |
| 0.58 | 0.89 | 0.92  | 0.67 | 0.6    | 0.53 | 0.63  | 0.53  | 2    | 0.52  | 1.22 |
| 0.93 | 0.81 | 1.35  | 1.8  | 1.23   | 1.04 | 1     | 1.39  | 1.22 | 4.94  | 1.59 |
| 1.11 | 1.14 | 1.04  | 0.59 | 0.86   | 1.25 | 0.94  | 1.12  | 0.97 | 1.17  | 1.14 |
| 3.42 | 1.04 | 1.25  | 2.39 | 1.38   | 1.23 | 1.06  | 1.65  | 1.28 | 1.69  | 1.1  |
| 0.68 | 0.84 | 0.85  | 0.78 | 0.9    | 0.96 | 0.95  | 1.01  | 1.04 | 0.87  | 1.06 |
| 2.52 | 0.82 | 2.38  | 1.19 | 6.01   | 1.58 | 1.05  | 0.52  | 0.81 | 0.54  | 0.89 |
| 0.55 | 0.92 | 0.86  | 0.68 | 0.74   | 1.03 | 0.88  | 0.2   | 1.07 | 0.82  | 0.81 |
| 0.96 | 0.93 | 1.71  | 2.01 | 5.45   | 0.98 | 1.63  | 1.64  | 0.85 | 0.56  | 1.06 |
| 1.59 | 0.93 | 1.15  | 0.53 | 1.2    | 0.79 | 0.73  | 12.88 | 1.14 | 1.69  | 0.7  |
| 1.04 | 1.24 | 1.05  | 0.93 | 0.64   | 1.15 | 0.84  | 6.07  | 0.97 | 2.14  | 1.13 |
| 0.7  | 1.03 | 0.79  | 1.24 | 1.96   | 0.82 | 0.95  | 0.08  | 0.95 | 0.33  | 0.66 |
| 0.48 | 0.82 | 23.86 | 1.14 | 0.62   | 1.81 | 1.95  | 0.52  | 0.76 | 0.78  | 1.16 |
| 3.34 | 1.51 | 0.68  | 1.53 | 0.59   | 1.17 | 1.08  | 3.96  | 0.47 | 1.01  | 1.15 |
| 1.82 | 1.31 | 1.75  | 1.63 | 0.5    | 1.25 | 1.39  | 0.97  | 1.98 | 2.22  | 2.16 |
| 0.89 | 1.02 | 0.54  | 0.74 | 0.82   | 0.88 | 0.65  | 2.12  | 1.06 | 0.69  | 1.43 |
| 1.45 | 0.76 | 1.23  | 0.8  | 0.46   | 0.47 | 0.58  | 0.73  | 2.51 | 0.26  | 1.22 |
| 0.92 | 1.45 | 0.8   | 4.06 | 0.67   | 1.15 | 0.61  | 8.8   | 0.79 | 3.22  | 0.92 |
| 1.46 | 0.96 | 1.05  | 1.49 | 1.04   | 0.99 | 0.69  | 2.53  | 1.32 | 1.14  | 1.61 |
| 0.84 | 1.07 | 0.6   | 3.67 | 142.34 | 0.8  | 0.76  | 0.9   | 1.06 | 1.76  | 1.02 |

|       |      |       |      |       |      |      |       |      |       |      |
|-------|------|-------|------|-------|------|------|-------|------|-------|------|
| 1.46  | 1.15 | 2     | 0.84 | 0.91  | 0.93 | 0.8  | 0.59  | 1.26 | 0.44  | 1.04 |
| 0.88  | 1    | 2.41  | 1.38 | 1.85  | 0.9  | 1.57 | 7.21  | 1.34 | 6     | 0.99 |
| 5.07  | 0.99 | 0.96  | 0.97 | 1     | 1.06 | 0.89 | 0.96  | 0.97 | 10.33 | 1    |
| 1.33  | 0.94 | 1.64  | 2.25 | 1.37  | 1.15 | 0.99 | 1.41  | 1.25 | 6.41  | 0.88 |
| 1.49  | 0.94 | 0.88  | 1    | 1.04  | 0.95 | 0.99 | 2.09  | 1.04 | 1.02  | 1.21 |
| 1.41  | 1.7  | 0.99  | 0.59 | 1.04  | 1.09 | 1.15 | 0.62  | 1.61 | 0.21  | 1.65 |
| 2.01  | 2.13 | 0.43  | 0.87 | 1.83  | 1.82 | 0.44 | 2.5   | 0.6  | 0.79  | 0.6  |
| 1.22  | 1.15 | 0.72  | 1.47 | 1.1   | 0.99 | 1.16 | 1.11  | 0.74 | 1.2   | 1.26 |
| 0.97  | 1.5  | 0.73  | 1.17 | 1.08  | 0.72 | 0.96 | 0.64  | 1.13 | 0.54  | 6.85 |
| 0.9   | 0.95 | 1.46  | 1.37 | 0.8   | 1.1  | 1.02 | 0.74  | 1.2  | 1.11  | 1.61 |
| 3.59  | 1.34 | 2.23  | 0.75 | 2.8   | 1.15 | 0.92 | 0.8   | 1.95 | 2.12  | 0.5  |
| 12.2  | 0.89 | 1.47  | 1.77 | 0.74  | 0.8  | 0.88 | 0.34  | 0.75 | 4.32  | 1.07 |
| 1.44  | 0.9  | 0.83  | 1.26 | 1.33  | 0.7  | 1.2  | 1.31  | 1.07 | 2.19  | 1.35 |
| 2.24  | 0.77 | 1.41  | 1.43 | 2     | 0.97 | 0.96 | 1.03  | 1.15 | 1.18  | 0.99 |
| 4.8   | 1.17 | 1.29  | 2.02 | 1     | 0.94 | 1.18 | 0.5   | 0.76 | 0.56  | 0.87 |
| 0.02  | 0.64 | 0.14  | 4.34 | 52.03 | 1.29 | 0.94 | 20.38 | 5.5  | 30.85 | 9.99 |
| 1.8   | 1.09 | 0.33  | 0.38 | 0.53  | 1.09 | 0.99 | 7.18  | 0.84 | 11.04 | 1.44 |
| 0.24  | 0.32 | 2.86  | 0.62 | 0.13  | 0.85 | 0.62 | 0.71  | 2.41 | 5.05  | 1.29 |
| 1.59  | 0.91 | 0.85  | 1.49 | 1.22  | 0.87 | 1.14 | 0.48  | 1.3  | 1.05  | 1.21 |
| 12.73 | 1.1  | 0.8   | 6.78 | 1.02  | 0.86 | 0.88 | 1.43  | 0.91 | 6.42  | 1.04 |
| 1.41  | 1.4  | 0.73  | 6.47 | 0.33  | 0.45 | 1.17 | 1.39  | 0.74 | 1.75  | 1.25 |
| 0.58  | 1.17 | 1.35  | 1.18 | 1.17  | 1.12 | 1.18 | 3.64  | 0.85 | 2.02  | 1.2  |
| 1.02  | 1.53 | 0.21  | 0.98 | 0.87  | 0.85 | 1.48 | 0.31  | 1.03 | 1.57  | 0.93 |
| 2.08  | 1.08 | 39.08 | 0.64 | 0.51  | 3.22 | 1.87 | 3.02  | 0.56 | 0.5   | 0.8  |
| 2.03  | 1.1  | 0.87  | 0.95 | 1.04  | 1.16 | 0.87 | 0.19  | 1.15 | 0.83  | 1.17 |
| 0.94  | 1.17 | 0.65  | 0.81 | 1.07  | 0.89 | 0.81 | 1.32  | 0.78 | 0.97  | 0.9  |
| 0.78  | 0.94 | 0.9   | 1.37 | 1.28  | 0.92 | 0.97 | 2.99  | 0.69 | 0.95  | 0.99 |
| 3.32  | 0.87 | 0.95  | 0.82 | 1.31  | 1.11 | 1.09 | 1.41  | 1.01 | 14.97 | 1    |
| 0.96  | 1.21 | 0.91  | 1.85 | 1.07  | 0.93 | 1.18 | 1.16  | 1.2  | 1.67  | 0.79 |
| 3.24  | 1.02 | 1.2   | 1.36 | 1.03  | 0.87 | 1.27 | 0.84  | 0.9  | 1.43  | 0.89 |
| 0.91  | 1.11 | 0.92  | 1.17 | 0.83  | 0.99 | 1.17 | 3.13  | 1.05 | 0.91  | 1.07 |
| 1.46  | 1.17 | 0.78  | 0.97 | 0.62  | 0.56 | 0.99 | 0.81  | 1.23 | 0.95  | 0.73 |
| 5.3   | 1.12 | 0.95  | 1.22 | 0.77  | 0.79 | 1.05 | 1.51  | 1.42 | 1.67  | 1.39 |

|      |      |      |      |      |      |      |       |       |      |      |
|------|------|------|------|------|------|------|-------|-------|------|------|
| 1.59 | 0.92 | 1.19 | 1.72 | 2.26 | 1.2  | 1.49 | 1.51  | 12.62 | 2.2  | 1.31 |
| 6.06 | 0.88 | 0.82 | 2.25 | 0.92 | 0.96 | 1.1  | 1.79  | 0.76  | 0.57 | 0.83 |
| 2.48 | 1.64 | 1.09 | 0.95 | 1.59 | 1.07 | 0.96 | 0.86  | 0.73  | 1.98 | 0.75 |
| 1.09 | 1.08 | 0.89 | 0.86 | 0.6  | 1.28 | 0.87 | 0.72  | 0.79  | 0.68 | 4.71 |
| 1.13 | 1.67 | 1.67 | 0.84 | 1.17 | 0.67 | 1.26 | 0.45  | 2.02  | 0.21 | 1.72 |
| 2.22 | 1.18 | 0.71 | 1.65 | 0.62 | 0.53 | 1.29 | 1.74  | 0.53  | 6.83 | 0.5  |
| 1.09 | 0.93 | 0.76 | 3.18 | 1.52 | 0.93 | 0.87 | 2.81  | 1.18  | 0.87 | 1.47 |
| 1.74 | 0.62 | 1.27 | 0.95 | 0.71 | 0.98 | 0.76 | 0.81  | 1.31  | 6.71 | 0.94 |
| 0.97 | 0.65 | 0.49 | 0.83 | 1.65 | 0.78 | 1.17 | 0.86  | 1.37  | 0.96 | 0.57 |
| 0.77 | 1    | 0.82 | 1.41 | 1.39 | 0.9  | 1.03 | 19.53 | 1.08  | 1.49 | 1.01 |
| 1.24 | 0.97 | 2.41 | 0.98 | 0.65 | 1.07 | 1.64 | 2.69  | 0.91  | 0.83 | 0.91 |
| 1.3  | 1.12 | 1.99 | 0.54 | 1.26 | 1.16 | 1.06 | 0.9   | 0.94  | 1.14 | 1.14 |
| 0.66 | 0.69 | 1.56 | 1.06 | 1.03 | 1.58 | 1.05 | 0.92  | 1     | 0.98 | 0.73 |
| 1.23 | 0.95 | 5.13 | 1.18 | 0.84 | 1.76 | 1.57 | 0.44  | 0.76  | 0.94 | 0.87 |
| 0.72 | 0.92 | 0.91 | 2.76 | 2.56 | 0.92 | 0.84 | 0.83  | 1.41  | 1.65 | 1.26 |
| 1.26 | 0.82 | 0.96 | 1.73 | 1.01 | 1.06 | 1.18 | 1.68  | 1.35  | 1.71 | 1.24 |
| 1.21 | 0.48 | 1    | 1.06 | 1.32 | 1.1  | 0.9  | 1.7   | 0.98  | 1.02 | 0.92 |
| 1.27 | 0.98 | 1.39 | 1.98 | 1.75 | 1.35 | 1.16 | 1.44  | 1.22  | 5.89 | 1.19 |
| 0.46 | 1.04 | 0.88 | 1.38 | 0.97 | 0.63 | 0.86 | 1.62  | 0.74  | 1.15 | 1.2  |
| 0.69 | 0.78 | 2.12 | 0.36 | 0.81 | 1.33 | 0.99 | 0.71  | 1.2   | 0.79 | 0.7  |
| 0.98 | 0.93 | 0.47 | 0.73 | 0.85 | 1.16 | 1.51 | 1.24  | 0.79  | 1.13 | 0.98 |
| 1.78 | 1.46 | 0.94 | 1.34 | 1.09 | 0.98 | 1.08 | 0.3   | 0.95  | 0.66 | 0.71 |
| 1.37 | 1.15 | 1.34 | 2.63 | 1.21 | 1.29 | 1.13 | 0.93  | 0.92  | 1.21 | 1.1  |
| 1.01 | 0.88 | 0.69 | 0.62 | 1.73 | 1.71 | 1.41 | 8     | 1.43  | 1.1  | 1.86 |
| 1.12 | 0.99 | 1.25 | 1.13 | 0.87 | 1.18 | 0.46 | 1.83  | 1.29  | 0.33 | 0.88 |
| 0.58 | 0.86 | 1.44 | 1.25 | 1.76 | 0.97 | 0.87 | 3.67  | 1.27  | 1.7  | 1.08 |
| 1.71 | 1.04 | 1.02 | 7    | 1.23 | 1.12 | 1.15 | 0.54  | 1.09  | 0.81 | 1.29 |
| 0.68 | 1.02 | 2.5  | 1.57 | 2.06 | 1.19 | 0.68 | 1.3   | 1.22  | 0.6  | 1.33 |
| 0.91 | 1.26 | 1.39 | 1.99 | 1.32 | 2.88 | 1.5  | 13.15 | 0.41  | 0.62 | 0.79 |
| 0.92 | 0.86 | 0.94 | 1.07 | 0.9  | 0.97 | 1.03 | 0.97  | 1.01  | 0.76 | 0.82 |
| 0.68 | 1.04 | 0.82 | 1.04 | 1.04 | 1.06 | 1.16 | 1.05  | 0.9   | 10.5 | 0.84 |
| 0.88 | 1    | 2.41 | 1.38 | 1.85 | 0.9  | 1.57 | 7.21  | 1.34  | 6    | 0.99 |
| 0.82 | 1.41 | 0.7  | 1.07 | 1.59 | 0.96 | 1.14 | 1.38  | 1.01  | 0.79 | 1.09 |

|      |      |      |      |      |      |      |      |      |      |      |
|------|------|------|------|------|------|------|------|------|------|------|
| 0.85 | 1.28 | 1.47 | 1.12 | 1.3  | 0.93 | 1.27 | 0.91 | 1.08 | 0.83 | 0.89 |
| 0.95 | 0.88 | 0.67 | 1.88 | 1.04 | 0.95 | 1.02 | 0.73 | 0.98 | 0.92 | 0.82 |
| 1.03 | 1.35 | 0.75 | 0.94 | 1.12 | 0.77 | 0.77 | 0.43 | 1.28 | 2.13 | 1.09 |
| 2.86 | 1.17 | 0.99 | 0.84 | 1.08 | 0.79 | 0.95 | 0.93 | 0.98 | 0.59 | 0.91 |
| 1.03 | 1.1  | 0.4  | 0.82 | 0.97 | 1.04 | 0.9  | 1.61 | 1.01 | 1.64 | 0.98 |
| 0.43 | 0.96 | 0.52 | 0.78 | 1.1  | 0.97 | 1.13 | 0.95 | 1.15 | 0.64 | 0.9  |
| 0.95 | 0.88 | 0.84 | 1.07 | 1.19 | 0.86 | 0.95 | 0.43 | 1.12 | 0.56 | 1    |
| 1.01 | 0.75 | 0.99 | 0.86 | 0.84 | 1.05 | 0.78 | 1.62 | 1.37 | 0.64 | 0.92 |
| 1.31 | 1.01 | 1.4  | 1.23 | 0.65 | 1.36 | 0.84 | 2.75 | 1.15 | 0.22 | 1.23 |
| 3.27 | 0.97 | 0.87 | 0.97 | 0.84 | 0.91 | 0.94 | 0.88 | 1.13 | 1.26 | 1.06 |
| 0.38 | 1.22 | 0.42 | 2.88 | 1.09 | 1.22 | 1.36 | 0.93 | 0.95 | 1.12 | 1.14 |
| 0.57 | 1.1  | 1.04 | 5.61 | 1.15 | 0.82 | 0.83 | 1.16 | 1.11 | 1.25 | 1.06 |
| 1.05 | 1.03 | 1.5  | 3.17 | 1.6  | 1.22 | 1.07 | 1.03 | 1.31 | 5.8  | 1.07 |
| 1.42 | 0.76 | 0.85 | 3.76 | 0.93 | 0.9  | 0.68 | 1.02 | 1.11 | 2.46 | 1.09 |
| 1    | 0.8  | 1.22 | 0.95 | 0.41 | 0.79 | 0.4  | 1.32 | 1.57 | 0.92 | 1.38 |
| 1.08 | 1.07 | 1.09 | 1.17 | 0.87 | 0.97 | 0.92 | 0.77 | 1.01 | 0.71 | 1.1  |
| 1.03 | 0.88 | 0.83 | 0.7  | 0.92 | 1    | 0.98 | 2.27 | 1.04 | 0.66 | 0.91 |
| 1.48 | 0.68 | 1.33 | 1.19 | 2.9  | 1.19 | 1.84 | 0.91 | 1.05 | 1.94 | 0.9  |
| 1.16 | 1.08 | 0.95 | 0.94 | 1.03 | 0.83 | 0.92 | 0.96 | 0.78 | 1.34 | 0.96 |
| 2.13 | 1.73 | 0.35 | 0.97 | 0.77 | 1.02 | 0.92 | 2.29 | 1.16 | 1.28 | 0.84 |
| 3.33 | 0.78 | 0.24 | 0.94 | 0.49 | 0.84 | 1.21 | 0.99 | 1.59 | 0.51 | 1.04 |
| 1.77 | 0.71 | 0.19 | 4.39 | 0.46 | 0.9  | 0.75 | 0.79 | 1.17 | 1.85 | 1.21 |
| 1.84 | 1.1  | 1.29 | 1.27 | 0.85 | 1.13 | 1    | 1.07 | 0.94 | 1.87 | 1.06 |
| 0.81 | 0.88 | 1.41 | 1.41 | 0.68 | 0.93 | 0.69 | 1.71 | 0.95 | 0.23 | 0.94 |
| 1.01 | 1.21 | 0.53 | 0.99 | 0.94 | 0.61 | 1.84 | 1.04 | 1    | 0.87 | 1.38 |
| 1.99 | 0.95 | 4.45 | 1.07 | 0.89 | 1.1  | 0.68 | 0.86 | 1.12 | 2.22 | 1.15 |
| 0.92 | 0.89 | 0.86 | 1.5  | 0.88 | 0.65 | 1.98 | 0.75 | 1.1  | 0.87 | 1.29 |
| 1.24 | 0.82 | 0.67 | 0.77 | 1.4  | 0.92 | 1.07 | 1.28 | 0.9  | 0.46 | 0.82 |
| 1.25 | 1.1  | 0.87 | 1.66 | 0.67 | 0.77 | 0.85 | 0.87 | 1.07 | 0.91 | 1.07 |
| 2.04 | 1.12 | 0.48 | 1.09 | 0.93 | 0.94 | 0.83 | 0.7  | 0.82 | 0.34 | 1.19 |
| 1.35 | 1    | 0.85 | 0.89 | 0.72 | 0.91 | 1.19 | 1.61 | 0.97 | 2.51 | 0.81 |
| 0.98 | 1    | 0.96 | 1.07 | 1.01 | 0.95 | 1.15 | 1.03 | 0.95 | 1.91 | 1.01 |
| 0.82 | 0.98 | 0.99 | 1.35 | 0.94 | 0.99 | 0.99 | 0.84 | 0.97 | 0.94 | 1.1  |

|      |      |       |      |      |      |      |        |      |       |      |
|------|------|-------|------|------|------|------|--------|------|-------|------|
| 0.6  | 1.06 | 0.97  | 2.43 | 0.81 | 1.05 | 1.35 | 0.33   | 1.21 | 0.6   | 6.69 |
| 2.08 | 0.91 | 1.08  | 0.97 | 0.89 | 1.01 | 1.1  | 1.25   | 0.88 | 2.75  | 0.82 |
| 0.81 | 0.9  | 1.01  | 1.04 | 0.96 | 1.18 | 0.95 | 7.52   | 0.92 | 1     | 1.01 |
| 1.24 | 0.78 | 2.34  | 2.85 | 0.77 | 0.96 | 0.66 | 0.97   | 1.65 | 0.69  | 1.19 |
| 0.6  | 0.91 | 2.98  | 1.27 | 0.68 | 1.48 | 0.96 | 4.39   | 0.83 | 1.68  | 0.51 |
| 1.39 | 1.04 | 0.99  | 1.21 | 0.92 | 0.89 | 1.01 | 0.96   | 0.94 | 0.92  | 0.99 |
| 1.82 | 1.06 | 0.81  | 1.08 | 1.4  | 0.92 | 1.42 | 0.34   | 0.95 | 0.76  | 0.7  |
| 0.61 | 0.97 | 0.94  | 5.91 | 2.13 | 1.18 | 1    | 0.75   | 1.19 | 0.95  | 0.93 |
| 5.77 | 0.98 | 1.8   | 1.84 | 0.71 | 0.96 | 1.01 | 0.96   | 1.1  | 1.2   | 0.94 |
| 1.53 | 1.08 | 0.81  | 1.01 | 1.63 | 0.97 | 1.55 | 0.24   | 1.01 | 1.05  | 0.68 |
| 0.11 | 1.02 | 2.28  | 1.15 | 0.9  | 1.59 | 1.89 | 0.36   | 1.39 | 1.18  | 0.73 |
| 0.67 | 0.8  | 0.91  | 0.68 | 0.93 | 1.09 | 2.48 | 1.54   | 0.99 | 2.1   | 0.83 |
| 0.68 | 1.04 | 0.79  | 0.46 | 0.98 | 1.09 | 0.81 | 0.64   | 1.04 | 0.99  | 0.92 |
| 0.56 | 0.87 | 0.98  | 1.12 | 0.92 | 0.89 | 0.93 | 14.55  | 0.95 | 5.54  | 0.91 |
| 4.2  | 1.12 | 1.07  | 0.87 | 0.97 | 0.89 | 0.96 | 1.02   | 1.04 | 0.59  | 0.92 |
| 1.22 | 1.07 | 0.67  | 0.91 | 1.52 | 0.79 | 1.02 | 2.76   | 1.08 | 0.86  | 1.06 |
| 1.04 | 1.2  | 0.83  | 1.31 | 0.86 | 1.19 | 0.87 | 1.85   | 1.12 | 1.14  | 1.19 |
| 1.03 | 0.88 | 0.92  | 1    | 0.97 | 0.96 | 1.05 | 1.19   | 0.93 | 0.83  | 0.78 |
| 0.71 | 0.85 | 1.37  | 0.75 | 1.24 | 1.35 | 0.55 | 0.7    | 1.12 | 0.58  | 1.21 |
| 1.36 | 1.08 | 1.19  | 0.41 | 0.99 | 1    | 0.92 | 1.52   | 1.49 | 1.23  | 1.12 |
| 1.02 | 0.94 | 1.35  | 0.91 | 1.01 | 1.05 | 1.27 | 3.12   | 0.52 | 0.95  | 1    |
| 0.99 | 1.2  | 5.83  | 2.06 | 1.33 | 1.21 | 1.07 | 269.44 | 1.27 | 0.62  | 0.57 |
| 1.48 | 0.88 | 1.07  | 1.26 | 1.34 | 0.85 | 1.01 | 16.45  | 1    | 2.85  | 0.96 |
| 1.05 | 0.84 | 0.88  | 0.53 | 0.89 | 0.84 | 1.16 | 0.6    | 1.03 | 0.81  | 3.2  |
| 0.48 | 0.97 | 0.81  | 0.98 | 1.27 | 0.96 | 0.82 | 9.75   | 1.01 | 1.01  | 1.13 |
| 1.35 | 0.71 | 1.97  | 1.44 | 0.27 | 1.5  | 0.68 | 1.8    | 0.7  | 56.44 | 1.07 |
| 3.6  | 1.02 | 0.87  | 0.62 | 0.84 | 0.92 | 1.05 | 2.14   | 1.05 | 0.95  | 0.87 |
| 0.96 | 1.06 | 1.04  | 1.3  | 0.93 | 0.99 | 1.08 | 0.77   | 0.92 | 1.02  | 0.95 |
| 3.33 | 0.87 | 0.99  | 1.47 | 0.93 | 0.99 | 1.01 | 1.31   | 1.09 | 0.87  | 1.12 |
| 0.47 | 0.63 | 0.99  | 2.73 | 0.86 | 1.04 | 0.91 | 0.96   | 0.88 | 0.8   | 0.84 |
| 1.47 | 1.16 | 0.96  | 4.76 | 1.49 | 0.91 | 0.89 | 0.94   | 0.75 | 1.14  | 1.16 |
| 0.89 | 0.93 | 0.79  | 1.21 | 0.88 | 1.01 | 0.92 | 3.3    | 0.82 | 1.01  | 0.84 |
| 3.07 | 1.67 | 10.67 | 2.45 | 0.75 | 0.75 | 0.77 | 3.6    | 0.96 | 0.49  | 1    |



|      |      |       |      |       |      |      |      |      |       |      |
|------|------|-------|------|-------|------|------|------|------|-------|------|
| 0.92 | 1.02 | 0.46  | 1.5  | 0.74  | 0.97 | 0.86 | 0.29 | 1.06 | 0.65  | 1.18 |
| 1.61 | 1.35 | 1.35  | 1.57 | 1.34  | 1.23 | 1.1  | 0.78 | 0.74 | 0.49  | 0.94 |
| 1.24 | 0.78 | 0.62  | 2.09 | 0.78  | 0.84 | 0.62 | 0.37 | 0.94 | 1.75  | 0.83 |
| 0.44 | 0.91 | 0.54  | 0.45 | 0.87  | 1.38 | 1.43 | 0.45 | 0.6  | 1.08  | 0.62 |
| 1.26 | 0.73 | 0.98  | 1.06 | 0.93  | 1.33 | 1.35 | 1.07 | 1.06 | 1.2   | 0.93 |
| 0.84 | 1.03 | 0.85  | 0.83 | 0.95  | 1.04 | 0.99 | 2.82 | 1.17 | 2.31  | 0.94 |
| 1.54 | 0.99 | 0.45  | 1.04 | 0.8   | 1.09 | 0.95 | 3.3  | 1.09 | 1.88  | 0.99 |
| 1.99 | 1.37 | 0.77  | 0.32 | 0.78  | 0.94 | 1.28 | 1.2  | 0.92 | 0.39  | 0.8  |
| 0.88 | 0.82 | 0.86  | 1.05 | 0.83  | 1.11 | 1.31 | 0.57 | 1.08 | 1.11  | 3.39 |
| 0.41 | 1.13 | 0.69  | 0.81 | 0.41  | 0.61 | 0.66 | 1.64 | 1.46 | 1.16  | 0.94 |
| 0.78 | 1.23 | 0.93  | 0.73 | 1.1   | 0.81 | 0.91 | 1.53 | 0.82 | 1.07  | 0.77 |
| 3.7  | 1.1  | 1.03  | 0.7  | 0.89  | 0.93 | 0.92 | 0.41 | 1.06 | 0.93  | 0.83 |
| 0.69 | 0.71 | 0.71  | 1.39 | 1.17  | 0.77 | 0.81 | 1.75 | 0.69 | 0.95  | 0.76 |
| 1.53 | 0.94 | 0.81  | 1.28 | 0.75  | 1.02 | 1.04 | 2.43 | 0.97 | 5.92  | 0.96 |
| 0.97 | 1.19 | 0.46  | 1.01 | 0.81  | 0.53 | 0.72 | 1.84 | 0.92 | 2.24  | 0.91 |
| 1.73 | 0.78 | 0.87  | 1.05 | 0.44  | 0.95 | 0.77 | 0.4  | 1.15 | 0.72  | 0.67 |
| 1.52 | 0.99 | 0.79  | 0.88 | 0.98  | 1.22 | 1.06 | 0.56 | 0.83 | 0.92  | 0.74 |
| 1.59 | 0.95 | 0.67  | 3.59 | 0.68  | 0.91 | 1.11 | 1.34 | 1.08 | 4.78  | 0.84 |
| 1.91 | 1.5  | 0.48  | 0.95 | 42.28 | 0.49 | 1.06 | 5.94 | 0.88 | 2.86  | 2.21 |
| 0.91 | 1.46 | 0.42  | 1.73 | 0.35  | 0.6  | 0.91 | 0.14 | 1.12 | 23.97 | 0.76 |
| 1.67 | 0.68 | 1.57  | 1.2  | 1.71  | 0.83 | 1.1  | 1.28 | 0.78 | 1.32  | 1.33 |
| 1.86 | 0.99 | 0.76  | 1.02 | 1.49  | 0.94 | 1.59 | 0.24 | 0.96 | 0.91  | 0.68 |
| 5.75 | 1.79 | 11.22 | 1.14 | 1.32  | 2.06 | 2    | 0.47 | 0.64 | 0.15  | 0.93 |
| 1.23 | 1.29 | 1.18  | 1.1  | 1.93  | 1.09 | 1.04 | 0.61 | 0.73 | 0.77  | 0.84 |
| 0.77 | 1.05 | 0.67  | 0.85 | 0.8   | 0.86 | 0.86 | 1.26 | 1.05 | 0.78  | 1.24 |
| 0.78 | 0.9  | 0.68  | 1.88 | 0.72  | 0.88 | 0.84 | 0.5  | 0.72 | 0.91  | 1.33 |
| 1.4  | 1.05 | 1.23  | 0.96 | 1.1   | 0.91 | 1.12 | 1.33 | 1.04 | 0.66  | 0.82 |
| 0.6  | 1.19 | 0.6   | 1.04 | 0.68  | 1.4  | 0.95 | 3.27 | 1.11 | 1.71  | 1.14 |
| 1.4  | 0.76 | 1.54  | 8.89 | 0.72  | 0.73 | 1.01 | 2.59 | 0.63 | 2.29  | 0.75 |
| 0.42 | 1.35 | 2.9   | 2.67 | 0.27  | 1.32 | 0.48 | 0.35 | 0.73 | 0.4   | 1.99 |
| 2.25 | 0.95 | 1.41  | 0.6  | 0.64  | 1.09 | 0.73 | 1.5  | 1.1  | 0.29  | 1.27 |
| 1.08 | 0.92 | 0.44  | 0.93 | 0.11  | 1.18 | 0.45 | 1.38 | 1.36 | 1.03  | 0.94 |
| 0.88 | 1.16 | 1.41  | 1.51 | 1.44  | 1.07 | 2.46 | 1.11 | 1.07 | 0.21  | 1.4  |

|      |       |      |      |       |      |      |      |       |      |      |
|------|-------|------|------|-------|------|------|------|-------|------|------|
| 0.81 | 0.92  | 0.65 | 1.21 | 0.86  | 1.07 | 1.05 | 0.46 | 0.83  | 0.84 | 1.07 |
| 1.01 | 1.05  | 1.27 | 0.88 | 1.17  | 1.02 | 0.97 | 0.56 | 0.98  | 1.22 | 1.06 |
| 1.68 | 0.83  | 3.26 | 1.11 | 1.02  | 1.03 | 1.52 | 0.29 | 9     | 3.21 | 2.45 |
| 1.11 | 0.6   | 0.62 | 0.67 | 0.45  | 1.3  | 1.2  | 0.67 | 0.82  | 0.99 | 0.59 |
| 2.43 | 1.22  | 1.25 | 0.62 | 0.82  | 0.83 | 0.83 | 4.27 | 1.01  | 1.18 | 0.73 |
| 0.97 | 0.97  | 2.41 | 1.36 | 1.32  | 1    | 1.28 | 0.63 | 1.05  | 0.28 | 1.28 |
| 1.46 | 0.99  | 1.13 | 1.63 | 0.89  | 1.32 | 1    | 3.29 | 0.99  | 2.48 | 1.25 |
| 0.65 | 1.17  | 3.29 | 0.97 | 1.09  | 1.14 | 1.18 | 2.24 | 0.94  | 1.01 | 1.07 |
| 0.75 | 1.2   | 1.26 | 1.36 | 0.78  | 0.88 | 0.86 | 0.84 | 1.18  | 0.6  | 1.24 |
| 2.34 | 0.98  | 0.83 | 0.95 | 0.57  | 0.95 | 0.82 | 6.69 | 1.13  | 0.18 | 1.08 |
| 1.47 | 0.94  | 0.6  | 1.05 | 0.87  | 0.87 | 1.04 | 2.24 | 0.98  | 1.04 | 1.25 |
| 0.06 | 11.77 | 2.33 | 0.06 | 14.57 | 5.25 | 0.33 | 0.5  | 48.59 | 1.28 | 1.69 |
| 1.56 | 1.01  | 1.72 | 1.02 | 0.89  | 1    | 1.04 | 1.84 | 1.09  | 1.8  | 1.35 |
| 0.8  | 0.65  | 2.28 | 0.58 | 0.76  | 1.8  | 1.12 | 1.11 | 1.04  | 0.82 | 1.16 |

| 202123_s_at | 210762_s_at | 207168_s_at | 204178_s_at | 202431_s_at | 209341_s_at | 203617_x_at | 201432_at | 210825_s_at | 204379_s_at | 205207_at |
|-------------|-------------|-------------|-------------|-------------|-------------|-------------|-----------|-------------|-------------|-----------|
| 0.99        | 9.17        | 0.97        | 1.08        | 1.04        | 1.02        | 0.97        | 1.13      | 0.93        | 1.3         | 0.3       |
| 0.95        | 0.75        | 0.92        | 1.26        | 0.41        | 1.16        | 1.01        | 1.11      | 1.17        | 2.74        | 1.16      |
| 0.98        | 4.16        | 0.97        | 0.86        | 1.13        | 1.85        | 1.01        | 1.05      | 0.79        | 0.67        | 1.38      |
| 1.14        | 0.93        | 0.93        | 1.59        | 1.17        | 1.14        | 1.1         | 1.16      | 0.87        | 0.87        | 1.43      |
| 0.99        | 1.02        | 1.02        | 1           | 1.22        | 1.51        | 0.99        | 0.81      | 0.92        | 0.54        | 9.4       |
| 1.01        | 3.79        | 0.97        | 1.82        | 735.49      | 0.71        | 1.46        | 1.81      | 1.03        | 1.21        | 0.93      |
| 1.43        | 3.68        | 0.96        | 1.17        | 0.85        | 1.34        | 1.23        | 1.05      | 1.24        | 0.13        | 8.21      |
| 1.18        | 0.88        | 0.94        | 1.33        | 1.08        | 0.95        | 1.1         | 1.03      | 1.09        | 1.06        | 1.03      |
| 0.79        | 0.88        | 1.04        | 0.75        | 0.82        | 1           | 0.92        | 0.81      | 0.93        | 1.75        | 1.73      |
| 1           | 1.93        | 0.85        | 1.27        | 1.95        | 0.75        | 0.9         | 0.55      | 0.92        | 3.79        | 68.55     |
| 1.47        | 1.25        | 1.02        | 0.86        | 0.89        | 1.27        | 0.79        | 1.04      | 1           | 1.07        | 0.32      |
| 0.95        | 0.98        | 1.31        | 1.41        | 0.97        | 1.1         | 0.94        | 1.3       | 1.38        | 0.56        | 0.42      |
| 0.79        | 0.97        | 1.13        | 1.13        | 1.03        | 1.16        | 0.98        | 1.21      | 1.1         | 1.72        | 0.87      |
| 0.37        | 9.96        | 0.15        | 3.52        | 0.15        | 0.26        | 1.2         | 0.16      | 0.02        | 0.14        | 22.95     |
| 1.41        | 1.6         | 1.1         | 1.23        | 1.71        | 1.47        | 1.5         | 1.54      | 0.83        | 0.81        | 0.38      |
| 1.2         | 0.85        | 1.01        | 1.01        | 0.92        | 1.21        | 0.83        | 1.22      | 0.99        | 1.46        | 0.42      |
| 0.95        | 1.16        | 1.03        | 1.1         | 0.83        | 1.25        | 1.02        | 1.11      | 1.16        | 2.17        | 0.49      |
| 1.13        | 0.56        | 0.98        | 1.01        | 0.74        | 1.05        | 1           | 0.83      | 0.77        | 2.93        | 1.22      |
| 0.99        | 1.57        | 1.31        | 0.97        | 0.22        | 1.32        | 1.2         | 1         | 1.04        | 6.49        | 2.3       |
| 1.08        | 3.4         | 0.62        | 0.82        | 0.74        | 1.39        | 0.72        | 0.78      | 0.56        | 1.12        | 0.62      |
| 0.71        | 1.25        | 0.74        | 1.83        | 0.49        | 0.49        | 1.08        | 1.12      | 1.6         | 1.58        | 0.56      |
| 1.43        | 1.5         | 0.86        | 1.02        | 0.88        | 0.93        | 1.51        | 1.01      | 1.19        | 0.62        | 27.02     |
| 0.9         | 0.73        | 0.95        | 0.89        | 1.41        | 1.07        | 0.91        | 1.43      | 1.03        | 0.38        | 1         |
| 1           | 3.88        | 0.71        | 1.21        | 0.75        | 1.21        | 1.2         | 1.26      | 1.09        | 0.01        | 1.45      |
| 0.41        | 3.04        | 0.79        | 0.82        | 6.79        | 1.79        | 0.83        | 1.56      | 0.78        | 0.03        | 10.3      |
| 1.05        | 2.58        | 1.08        | 1.26        | 0.76        | 0.85        | 1           | 0.76      | 1.08        | 1.58        | 3.47      |
| 1.01        | 2.45        | 1.05        | 0.77        | 0.76        | 1.14        | 0.9         | 1.58      | 0.76        | 0.63        | 0.5       |
| 2.5         | 1.37        | 0.62        | 0.85        | 1.03        | 0.97        | 2.21        | 1.34      | 0.66        | 0.58        | 16.43     |
| 1.65        | 0.15        | 0.71        | 1.04        | 3.43        | 0.5         | 1.97        | 3.64      | 1.62        | 0.04        | 0.39      |
| 1           | 1.45        | 0.82        | 1.01        | 3.16        | 0.83        | 1.02        | 0.83      | 1.04        | 2.25        | 1.78      |

|      |      |      |      |        |      |      |       |      |       |       |
|------|------|------|------|--------|------|------|-------|------|-------|-------|
| 0.84 | 0.89 | 0.78 | 1.21 | 1.37   | 0.69 | 1.22 | 0.47  | 0.89 | 0.8   | 8.62  |
| 2.9  | 2.3  | 3.49 | 6    | 4.73   | 3.19 | 2.78 | 11.35 | 2.9  | 1.88  | 9.55  |
| 1.04 | 1.04 | 1.08 | 1.01 | 0.71   | 1.26 | 0.98 | 1     | 0.91 | 1.03  | 0.83  |
| 0.84 | 1.06 | 1.52 | 1.02 | 0.55   | 0.76 | 1.1  | 0.74  | 1.17 | 0.12  | 1.72  |
| 1.18 | 0.73 | 1.38 | 0.13 | 1.69   | 2.42 | 1.17 | 0.32  | 0.16 | 0.55  | 2.46  |
| 2.32 | 0.61 | 0.87 | 0.71 | 1.53   | 0.78 | 1.2  | 0.54  | 0.93 | 29.75 | 4.34  |
| 0.49 | 0.22 | 0.89 | 1    | 0.97   | 0.93 | 0.9  | 0.43  | 1.44 | 3.89  | 0.1   |
| 0.91 | 0.87 | 1.18 | 0.72 | 1.17   | 0.78 | 0.8  | 0.93  | 1.01 | 1.01  | 1.17  |
| 0.74 | 7.28 | 1.06 | 0.76 | 0.55   | 0.89 | 0.95 | 1.89  | 0.87 | 1.38  | 0.94  |
| 1.84 | 0.28 | 0.65 | 0.53 | 0.48   | 1.88 | 0.93 | 1.8   | 1.53 | 1.38  | 1.77  |
| 0.88 | 1.25 | 0.92 | 1.25 | 0.71   | 1.12 | 1.26 | 0.8   | 1.05 | 1.1   | 0.2   |
| 1.06 | 0.99 | 1.15 | 0.91 | 0.47   | 0.95 | 0.99 | 1.04  | 1.1  | 2.37  | 0.77  |
| 0.91 | 0.77 | 0.99 | 0.44 | 0.44   | 1.41 | 1.03 | 0.81  | 0.84 | 0.26  | 3.01  |
| 0.77 | 0.73 | 0.88 | 0.64 | 2.84   | 1.49 | 0.78 | 1.23  | 0.47 | 0.82  | 0.67  |
| 0.87 | 0.76 | 1.02 | 0.55 | 0.6    | 1.22 | 0.83 | 0.93  | 0.92 | 0.7   | 2.59  |
| 1.04 | 2.77 | 0.91 | 1.02 | 1.23   | 1.59 | 1.14 | 1.3   | 0.93 | 5.33  | 10.83 |
| 0.96 | 1.04 | 1.06 | 1.05 | 0.86   | 1.14 | 0.92 | 1.05  | 1.1  | 2.08  | 0.21  |
| 0.86 | 1.09 | 1.05 | 0.95 | 1.38   | 1.1  | 1.11 | 0.8   | 0.91 | 0.87  | 2.13  |
| 0.99 | 1.01 | 1.05 | 0.92 | 0.9    | 1.06 | 1.21 | 0.96  | 0.94 | 1.02  | 1.16  |
| 1.3  | 1.43 | 0.77 | 1.39 | 6.01   | 0.89 | 0.92 | 0.72  | 1.44 | 5.28  | 4.22  |
| 1.12 | 0.56 | 1.11 | 0.96 | 0.74   | 0.81 | 0.89 | 1.34  | 1.16 | 2.19  | 0.25  |
| 0.99 | 1.04 | 1.19 | 0.96 | 5.45   | 1.06 | 0.81 | 1.01  | 1.13 | 0.86  | 1.29  |
| 0.76 | 0.48 | 0.83 | 0.94 | 1.2    | 0.7  | 1.01 | 1.06  | 1.03 | 0.67  | 0.85  |
| 1.17 | 5.46 | 1.76 | 1.18 | 0.64   | 1.13 | 1.38 | 1.73  | 0.94 | 1.74  | 3.13  |
| 0.9  | 0.42 | 1.1  | 1.17 | 1.96   | 0.66 | 1.07 | 0.77  | 0.87 | 0.59  | 4.27  |
| 1.12 | 0.64 | 1.28 | 1.66 | 0.62   | 1.16 | 2.71 | 0.92  | 1.14 | 2.56  | 0.87  |
| 0.67 | 0.57 | 1.38 | 2.1  | 0.59   | 1.15 | 1.16 | 0.63  | 0.74 | 4.9   | 62.08 |
| 2.34 | 1.44 | 1.19 | 0.61 | 0.5    | 2.16 | 1.04 | 0.75  | 1.17 | 0.66  | 0.85  |
| 1    | 1.21 | 0.95 | 0.79 | 0.82   | 1.43 | 1.04 | 1.27  | 0.9  | 1.62  | 0.89  |
| 0.8  | 0.91 | 0.97 | 0.47 | 0.46   | 1.22 | 0.88 | 0.78  | 0.94 | 0.49  | 5.01  |
| 0.78 | 4.7  | 2.74 | 0.92 | 0.67   | 0.92 | 1.17 | 2.85  | 0.89 | 3.73  | 1.33  |
| 1.24 | 0.76 | 0.94 | 0.85 | 1.04   | 1.61 | 0.91 | 0.93  | 0.5  | 0.07  | 0.97  |
| 1.03 | 1.31 | 0.91 | 0.83 | 142.34 | 1.02 | 1.29 | 1.33  | 1.04 | 1.35  | 1.32  |

|      |      |      |      |       |      |      |        |       |       |      |
|------|------|------|------|-------|------|------|--------|-------|-------|------|
| 1.12 | 0.78 | 1.11 | 0.9  | 0.91  | 1.04 | 0.78 | 1.66   | 0.98  | 1.75  | 1.06 |
| 0.9  | 1.55 | 0.86 | 1.2  | 1.85  | 0.99 | 1.52 | 0.81   | 0.96  | 10.91 | 4.79 |
| 0.93 | 4.62 | 0.98 | 1.03 | 1     | 1    | 1.03 | 1.03   | 1.07  | 5.5   | 2.39 |
| 0.98 | 7.92 | 1    | 1.03 | 1.37  | 0.88 | 0.97 | 1.1    | 1.14  | 4.15  | 1.45 |
| 1.04 | 1.13 | 0.96 | 0.81 | 1.04  | 1.21 | 1.11 | 0.85   | 1.07  | 1.33  | 1.2  |
| 1.04 | 0.64 | 1.28 | 0.9  | 1.04  | 1.65 | 0.62 | 1.59   | 1.18  | 1     | 2.02 |
| 1.84 | 0.67 | 0.85 | 1.41 | 1.83  | 0.6  | 1.67 | 2.16   | 0.52  | 0.79  | 1.21 |
| 0.96 | 0.7  | 1.05 | 1.56 | 1.1   | 1.26 | 1.5  | 1.69   | 0.95  | 2.14  | 1.15 |
| 1.26 | 1.67 | 0.88 | 1.17 | 1.08  | 6.85 | 1.11 | 0.88   | 2.35  | 3.72  | 0.84 |
| 0.61 | 0.55 | 0.81 | 0.76 | 0.8   | 1.61 | 1.44 | 1.21   | 0.98  | 0.51  | 0.74 |
| 6.73 | 1.98 | 1.04 | 1.44 | 2.8   | 0.5  | 1.51 | 1.79   | 2.26  | 0.68  | 2.45 |
| 0.71 | 2.49 | 1.08 | 1.01 | 0.74  | 1.07 | 0.73 | 0.69   | 1.01  | 0.79  | 3    |
| 1.11 | 1.3  | 0.83 | 0.76 | 1.33  | 1.35 | 1.49 | 0.97   | 1.19  | 0.66  | 2.96 |
| 0.63 | 2.14 | 0.81 | 0.73 | 2     | 0.99 | 0.83 | 0.88   | 1.03  | 0.65  | 7.4  |
| 1.04 | 2.93 | 1.31 | 1.25 | 1     | 0.87 | 0.95 | 1.01   | 1.3   | 0.97  | 0.47 |
| 1.47 | 0.22 | 12.5 | 0.74 | 52.03 | 9.99 | 1.24 | 147.17 | 20.36 | 2.44  | 0.27 |
| 0.99 | 0.4  | 1.07 | 0.77 | 0.53  | 1.44 | 1.02 | 1.41   | 0.7   | 4.44  | 1.41 |
| 0.91 | 0.35 | 1.95 | 0.73 | 0.13  | 1.29 | 1.2  | 0.82   | 2.63  | 7.33  | 0.26 |
| 1.11 | 0.98 | 0.93 | 0.95 | 1.22  | 1.21 | 0.92 | 0.91   | 0.87  | 0.78  | 0.91 |
| 0.9  | 0.9  | 0.99 | 1.22 | 1.02  | 1.04 | 2    | 0.85   | 0.88  | 1.77  | 0.87 |
| 1.27 | 1.12 | 0.95 | 0.9  | 0.33  | 1.25 | 1.33 | 0.83   | 1.57  | 1.44  | 7.44 |
| 1.19 | 1.3  | 1.11 | 1.15 | 1.17  | 1.2  | 1.02 | 1.28   | 0.94  | 11.68 | 2.16 |
| 1.13 | 2.13 | 1.01 | 1.12 | 0.87  | 0.93 | 1.28 | 0.74   | 1.04  | 0.13  | 5.29 |
| 1.91 | 0.42 | 0.92 | 3.02 | 0.51  | 0.8  | 0.73 | 0.83   | 0.93  | 22.71 | 0.6  |
| 0.92 | 0.82 | 1.02 | 0.86 | 1.04  | 1.17 | 0.97 | 1.5    | 0.99  | 0.26  | 0.64 |
| 0.93 | 2.07 | 0.97 | 1.02 | 1.07  | 0.9  | 0.67 | 1.22   | 0.89  | 0.87  | 0.9  |
| 1.11 | 1    | 1.02 | 1.28 | 1.28  | 0.99 | 0.99 | 0.92   | 1.07  | 1.26  | 0.8  |
| 1.14 | 3.61 | 0.99 | 1    | 1.31  | 1    | 1.24 | 0.95   | 1.18  | 3.83  | 3.89 |
| 0.86 | 2.14 | 0.95 | 1.07 | 1.07  | 0.79 | 1.3  | 1.05   | 1.08  | 1.28  | 2.03 |
| 1.15 | 0.92 | 1.02 | 1.22 | 1.03  | 0.89 | 1.18 | 0.96   | 0.92  | 1.2   | 1.09 |
| 0.94 | 0.97 | 1    | 1.12 | 0.83  | 1.07 | 0.84 | 0.88   | 0.94  | 1.34  | 0.84 |
| 0.8  | 0.64 | 0.77 | 0.76 | 0.62  | 0.73 | 0.87 | 0.74   | 1.14  | 3.78  | 0.36 |
| 1.02 | 7.25 | 0.81 | 0.9  | 0.77  | 1.39 | 1.09 | 0.91   | 0.8   | 0.98  | 7.33 |

|      |      |      |      |      |      |      |      |      |       |       |
|------|------|------|------|------|------|------|------|------|-------|-------|
| 1.18 | 1.34 | 0.99 | 1.08 | 2.26 | 1.31 | 1.05 | 0.69 | 1.06 | 1.09  | 1.3   |
| 0.99 | 0.31 | 1.07 | 0.95 | 0.92 | 0.83 | 1.11 | 1.03 | 1.06 | 1.27  | 2     |
| 1.09 | 1.51 | 0.89 | 1.08 | 1.59 | 0.75 | 1.47 | 1.19 | 0.94 | 1.12  | 3.26  |
| 1.17 | 0.78 | 0.75 | 1.29 | 0.6  | 4.71 | 1.3  | 0.98 | 1.41 | 1.64  | 1.09  |
| 0.84 | 0.97 | 1.55 | 1.21 | 1.17 | 1.72 | 0.71 | 1.17 | 1.08 | 0.61  | 1.78  |
| 0.47 | 1.57 | 0.58 | 0.71 | 0.62 | 0.5  | 0.63 | 0.48 | 0.78 | 1.2   | 1.98  |
| 1.21 | 1.26 | 0.83 | 0.78 | 1.52 | 1.47 | 0.87 | 0.9  | 0.76 | 0.78  | 5.14  |
| 1.02 | 1.43 | 1.13 | 0.82 | 0.71 | 0.94 | 1.04 | 1.32 | 1.76 | 1.74  | 0.76  |
| 0.95 | 0.84 | 0.68 | 1.03 | 1.65 | 0.57 | 0.93 | 1.23 | 0.64 | 0.94  | 1.52  |
| 1.18 | 1.86 | 1.08 | 0.91 | 1.39 | 1.01 | 1.11 | 0.97 | 0.95 | 0.74  | 1.95  |
| 0.86 | 0.75 | 1.43 | 1.03 | 0.65 | 0.91 | 1.09 | 1.02 | 0.94 | 1.01  | 1.19  |
| 0.93 | 0.97 | 1.02 | 1.22 | 1.26 | 1.14 | 1.2  | 1.17 | 1.02 | 0.82  | 0.8   |
| 0.97 | 0.96 | 1.08 | 1.68 | 1.03 | 0.73 | 0.9  | 0.88 | 1.04 | 1.36  | 8.24  |
| 1.12 | 1.15 | 1.15 | 1.17 | 0.84 | 0.87 | 1.36 | 0.8  | 1.28 | 0.31  | 1.09  |
| 1.09 | 0.69 | 1    | 0.83 | 2.56 | 1.26 | 0.98 | 0.98 | 0.99 | 0.88  | 1.35  |
| 1.29 | 1.33 | 1.06 | 0.98 | 1.01 | 1.24 | 0.97 | 0.84 | 1.09 | 2.95  | 0.99  |
| 0.75 | 0.39 | 0.94 | 1.06 | 1.32 | 0.92 | 0.9  | 1.08 | 1    | 2.77  | 1.8   |
| 1.15 | 8.55 | 1.02 | 1.2  | 1.75 | 1.19 | 0.97 | 1.05 | 1.06 | 3.43  | 2.44  |
| 0.9  | 1.4  | 0.9  | 0.95 | 0.97 | 1.2  | 0.94 | 1.02 | 1.1  | 1.47  | 1.68  |
| 1.1  | 4.53 | 1.23 | 0.98 | 0.81 | 0.7  | 1    | 0.92 | 0.89 | 1.82  | 1.75  |
| 0.82 | 1.14 | 0.99 | 1.59 | 0.85 | 0.98 | 1.09 | 0.78 | 0.77 | 0.66  | 1.15  |
| 1.09 | 0.36 | 0.91 | 0.92 | 1.09 | 0.71 | 1.04 | 0.95 | 0.96 | 0.9   | 2.54  |
| 1.03 | 1.01 | 0.93 | 1.05 | 1.21 | 1.1  | 1    | 1.07 | 1.14 | 2.61  | 0.91  |
| 0.94 | 1    | 0.95 | 0.86 | 1.73 | 1.86 | 0.76 | 1.23 | 0.94 | 1.22  | 1.15  |
| 1.35 | 0.77 | 1.03 | 0.98 | 0.87 | 0.88 | 0.95 | 1.13 | 1.36 | 0.7   | 0.58  |
| 0.75 | 1.54 | 0.84 | 0.78 | 1.76 | 1.08 | 0.92 | 1    | 0.96 | 1.16  | 1.86  |
| 1.02 | 0.76 | 1.12 | 0.95 | 1.23 | 1.29 | 1.18 | 0.73 | 0.93 | 1.02  | 1     |
| 1.28 | 1.36 | 0.87 | 0.61 | 2.06 | 1.33 | 0.76 | 1.13 | 0.82 | 0.94  | 0.83  |
| 0.79 | 2.68 | 1.18 | 1.39 | 1.32 | 0.79 | 0.98 | 1.11 | 0.77 | 0.23  | 0.88  |
| 0.9  | 1.02 | 0.96 | 1.19 | 0.9  | 0.82 | 1.22 | 0.91 | 1.01 | 0.75  | 10.34 |
| 1.08 | 0.26 | 1.02 | 0.93 | 1.04 | 0.84 | 0.9  | 0.98 | 1.08 | 1.24  | 1.23  |
| 0.9  | 1.55 | 0.86 | 1.2  | 1.85 | 0.99 | 1.52 | 0.81 | 0.96 | 10.91 | 4.79  |
| 1.13 | 0.81 | 1    | 1.01 | 1.59 | 1.09 | 0.89 | 0.81 | 0.95 | 0.75  | 8.18  |

|      |       |      |      |      |      |      |      |      |      |       |
|------|-------|------|------|------|------|------|------|------|------|-------|
| 1.15 | 0.24  | 1.11 | 1.02 | 1.3  | 0.89 | 1.22 | 1.47 | 0.97 | 1.15 | 0.39  |
| 1.08 | 1.57  | 0.97 | 1.04 | 1.04 | 0.82 | 0.86 | 1.05 | 0.81 | 0.85 | 2.72  |
| 1.28 | 1.08  | 1.2  | 0.74 | 1.12 | 1.09 | 2.05 | 0.91 | 0.81 | 1.15 | 0.52  |
| 1.06 | 1.21  | 0.98 | 0.95 | 1.08 | 0.91 | 0.92 | 1.02 | 1    | 0.88 | 6.17  |
| 0.93 | 0.81  | 1.06 | 0.78 | 0.97 | 0.98 | 1.08 | 1.1  | 0.91 | 3.72 | 0.45  |
| 0.95 | 0.82  | 0.99 | 1.12 | 1.1  | 0.9  | 0.8  | 1.03 | 0.99 | 1.13 | 0.96  |
| 0.82 | 0.18  | 1.02 | 1    | 1.19 | 1    | 1.51 | 0.9  | 0.95 | 0.95 | 0.71  |
| 1.09 | 0.97  | 1.02 | 0.81 | 0.84 | 0.92 | 1.11 | 0.83 | 0.97 | 0.84 | 1.07  |
| 1.17 | 3.66  | 1.17 | 0.99 | 0.65 | 1.23 | 1.31 | 0.56 | 2.19 | 0.09 | 4.09  |
| 0.95 | 19.75 | 0.86 | 1.05 | 0.84 | 1.06 | 1.58 | 1.05 | 1.06 | 7.02 | 2.01  |
| 0.76 | 0.87  | 1.13 | 1.01 | 1.09 | 1.14 | 1.43 | 0.92 | 1.1  | 0.41 | 1.33  |
| 0.97 | 0.77  | 1.09 | 0.99 | 1.15 | 1.06 | 0.83 | 0.95 | 0.9  | 2.22 | 3.13  |
| 1.3  | 7.45  | 1.03 | 1.21 | 1.6  | 1.07 | 0.98 | 1.34 | 1.08 | 2.78 | 1.97  |
| 0.97 | 0.83  | 0.9  | 0.62 | 0.93 | 1.09 | 1.08 | 0.92 | 0.91 | 1.01 | 0.47  |
| 0.86 | 2.09  | 0.8  | 0.81 | 0.41 | 1.38 | 0.88 | 0.58 | 1.53 | 0.66 | 14.38 |
| 0.97 | 0.76  | 0.94 | 1.13 | 0.87 | 1.1  | 0.94 | 1.23 | 1    | 3.11 | 0.63  |
| 0.91 | 0.97  | 1.02 | 0.94 | 0.92 | 0.91 | 0.84 | 0.96 | 1.21 | 0.72 | 1.29  |
| 1.38 | 5.44  | 1.22 | 1.82 | 2.9  | 0.9  | 1.8  | 0.73 | 1.21 | 1.09 | 2.67  |
| 0.93 | 1.17  | 1.03 | 1.04 | 1.03 | 0.96 | 0.93 | 1.02 | 1.17 | 0.56 | 1.04  |
| 1.08 | 1.16  | 0.98 | 0.91 | 0.77 | 0.84 | 1.07 | 0.45 | 1.13 | 0.94 | 0.26  |
| 0.73 | 0.85  | 1.01 | 0.78 | 0.49 | 1.04 | 1.05 | 1.27 | 0.68 | 0.96 | 1.63  |
| 0.75 | 3.09  | 1.17 | 1.16 | 0.46 | 1.21 | 0.91 | 0.5  | 1.09 | 0.57 | 3.06  |
| 1.01 | 1.42  | 1.06 | 0.91 | 0.85 | 1.06 | 1.13 | 1.24 | 1.1  | 0.82 | 1.31  |
| 0.87 | 1.13  | 0.81 | 0.63 | 0.68 | 0.94 | 0.87 | 1.36 | 1.06 | 1.81 | 0.6   |
| 0.73 | 1.31  | 0.98 | 1.19 | 0.94 | 1.38 | 1.36 | 0.88 | 1.09 | 3.31 | 1.27  |
| 1    | 0.97  | 1.04 | 1.06 | 0.89 | 1.15 | 1.15 | 0.74 | 1.07 | 1.12 | 0.32  |
| 1.12 | 8.54  | 1    | 1.15 | 0.88 | 1.29 | 0.72 | 1.16 | 1.47 | 0.87 | 1.25  |
| 0.86 | 3.08  | 0.88 | 1.25 | 1.4  | 0.82 | 0.93 | 0.9  | 1.03 | 1.16 | 1.68  |
| 0.97 | 0.86  | 1    | 0.83 | 0.67 | 1.07 | 1.04 | 1.01 | 0.89 | 1.06 | 1.15  |
| 0.98 | 0.56  | 1.07 | 0.81 | 0.93 | 1.19 | 1.32 | 1.08 | 0.94 | 1.13 | 1.84  |
| 1.07 | 2.12  | 1.11 | 1.19 | 0.72 | 0.81 | 0.8  | 0.88 | 1.04 | 0.89 | 1.31  |
| 0.93 | 1.86  | 1    | 1.07 | 1.01 | 1.01 | 0.97 | 0.96 | 0.99 | 1.8  | 2.97  |
| 0.98 | 0.75  | 1.01 | 1.07 | 0.94 | 1.1  | 0.96 | 1.06 | 1.17 | 1.33 | 0.78  |

|      |      |      |      |      |      |      |      |      |      |       |
|------|------|------|------|------|------|------|------|------|------|-------|
| 1.49 | 1.46 | 0.97 | 1.58 | 0.81 | 6.69 | 1.09 | 1.12 | 2.47 | 5.19 | 0.71  |
| 1.07 | 1.88 | 1.04 | 1.31 | 0.89 | 0.82 | 0.98 | 0.91 | 1.16 | 1.38 | 1.25  |
| 0.99 | 0.99 | 0.96 | 1.09 | 0.96 | 1.01 | 1.01 | 0.98 | 1.15 | 0.57 | 0.67  |
| 0.52 | 1.1  | 1.04 | 0.74 | 0.77 | 1.19 | 0.85 | 1.25 | 0.94 | 0.9  | 0.94  |
| 1.07 | 1.66 | 1.23 | 2.1  | 0.68 | 0.51 | 0.98 | 0.85 | 1.31 | 1.53 | 1.79  |
| 0.97 | 1.21 | 0.96 | 1.29 | 0.92 | 0.99 | 1    | 0.97 | 0.87 | 0.99 | 1.45  |
| 0.83 | 1.08 | 0.76 | 1.17 | 1.4  | 0.7  | 1.39 | 0.43 | 0.8  | 1.07 | 10.29 |
| 0.92 | 1.1  | 1.03 | 0.96 | 2.13 | 0.93 | 0.84 | 1.08 | 1.03 | 1.2  | 1.08  |
| 1.06 | 0.93 | 1.06 | 1.13 | 0.71 | 0.94 | 1.29 | 0.93 | 0.98 | 1.26 | 0.65  |
| 0.93 | 1.02 | 0.76 | 1.22 | 1.63 | 0.68 | 0.99 | 0.49 | 0.86 | 2.16 | 6.44  |
| 1.21 | 0.93 | 0.96 | 0.78 | 0.9  | 0.73 | 0.85 | 1.06 | 0.87 | 1.62 | 1.73  |
| 1.11 | 0.62 | 0.93 | 1.11 | 0.93 | 0.83 | 1.08 | 0.81 | 1.59 | 0.9  | 1.13  |
| 0.77 | 1.62 | 0.9  | 0.93 | 0.98 | 0.92 | 0.73 | 0.84 | 0.78 | 0.7  | 1.38  |
| 1.02 | 0.99 | 1.06 | 0.98 | 0.92 | 0.91 | 0.83 | 0.99 | 1    | 0.77 | 1.65  |
| 0.97 | 0.7  | 1.05 | 1    | 0.97 | 0.92 | 1.12 | 0.94 | 1.06 | 0.93 | 2.89  |
| 1.06 | 1.37 | 0.87 | 1.14 | 1.52 | 1.06 | 0.92 | 1.46 | 1    | 1.09 | 1.23  |
| 1.06 | 1.17 | 0.99 | 1.44 | 0.86 | 1.19 | 1.4  | 0.91 | 1.02 | 1.59 | 1.04  |
| 0.94 | 0.9  | 1    | 0.98 | 0.97 | 0.78 | 0.76 | 0.91 | 0.91 | 2.04 | 3.19  |
| 1.29 | 1.07 | 1.24 | 0.7  | 1.24 | 1.21 | 0.97 | 0.76 | 0.61 | 0.91 | 0.34  |
| 0.92 | 1.07 | 0.9  | 0.92 | 0.99 | 1.12 | 0.82 | 1.16 | 1.26 | 1.09 | 0.9   |
| 1.32 | 0.52 | 1.01 | 0.97 | 1.01 | 1    | 1.05 | 1.01 | 1.23 | 0.57 | 1.13  |
| 0.97 | 0.34 | 1.94 | 1.26 | 1.33 | 0.57 | 1.37 | 1.34 | 1.14 | 0.13 | 0.22  |
| 1.03 | 0.59 | 0.95 | 1.17 | 1.34 | 0.96 | 0.85 | 1.08 | 1.06 | 0.97 | 1     |
| 1.34 | 1.21 | 1.01 | 1.09 | 0.89 | 3.2  | 1.18 | 1.07 | 1.28 | 5.22 | 0.88  |
| 1.03 | 0.97 | 0.93 | 0.89 | 1.27 | 1.13 | 1.08 | 0.93 | 1.02 | 0.66 | 1.31  |
| 1.45 | 1.74 | 0.82 | 0.59 | 0.27 | 1.07 | 0.83 | 2.26 | 1.05 | 2.29 | 0.18  |
| 1.27 | 1.08 | 0.99 | 1.23 | 0.84 | 0.87 | 1.39 | 0.94 | 1    | 0.88 | 1.41  |
| 0.98 | 1.96 | 1.04 | 1.01 | 0.93 | 0.95 | 0.88 | 1.09 | 1    | 1.86 | 0.77  |
| 0.92 | 1.18 | 1.01 | 1.13 | 0.93 | 1.12 | 1.01 | 0.94 | 1.02 | 2    | 4.94  |
| 0.87 | 0.5  | 1.06 | 0.96 | 0.86 | 0.84 | 0.53 | 1.15 | 1.05 | 0.93 | 0.88  |
| 0.88 | 0.84 | 1.18 | 1.06 | 1.49 | 1.16 | 1.25 | 1.43 | 0.9  | 0.75 | 0.66  |
| 1.18 | 0.7  | 1.14 | 0.83 | 0.88 | 0.84 | 1.23 | 0.8  | 1.05 | 1.19 | 1.2   |
| 1.03 | 0.92 | 1.08 | 1.02 | 0.75 | 1    | 2.43 | 0.97 | 1.17 | 0.9  | 0.25  |



|      |      |      |      |       |      |      |      |      |       |      |
|------|------|------|------|-------|------|------|------|------|-------|------|
| 1.24 | 0.67 | 0.96 | 0.92 | 0.74  | 1.18 | 1.77 | 0.95 | 1.16 | 15.26 | 2.96 |
| 1.11 | 1.1  | 1.05 | 0.91 | 1.34  | 0.94 | 1.1  | 0.97 | 0.96 | 0.66  | 0.34 |
| 1.16 | 6.91 | 1.16 | 1.16 | 0.78  | 0.83 | 0.99 | 0.79 | 0.99 | 0.71  | 1.4  |
| 0.72 | 1.02 | 0.74 | 1.08 | 0.87  | 0.62 | 0.74 | 0.87 | 0.67 | 3.66  | 1.07 |
| 1.34 | 7.53 | 1.11 | 1.63 | 0.93  | 0.93 | 1.44 | 0.75 | 0.78 | 0.87  | 1.08 |
| 0.89 | 2.5  | 1.04 | 0.82 | 0.95  | 0.94 | 0.78 | 1.12 | 1.07 | 1.33  | 2.28 |
| 0.94 | 1.58 | 0.85 | 0.9  | 0.8   | 0.99 | 0.84 | 0.94 | 1.15 | 0.57  | 1.38 |
| 0.91 | 0.3  | 0.84 | 0.94 | 0.78  | 0.8  | 1.01 | 0.96 | 1.18 | 0.61  | 2.08 |
| 1.19 | 1.82 | 0.94 | 1.42 | 0.83  | 3.39 | 1.44 | 0.61 | 1.97 | 3.99  | 0.64 |
| 1.02 | 1.27 | 0.86 | 0.88 | 0.41  | 0.94 | 1.48 | 1.34 | 0.59 | 4.39  | 2    |
| 0.82 | 0.62 | 0.95 | 0.9  | 1.1   | 0.77 | 0.82 | 1.04 | 1.05 | 0.77  | 2.45 |
| 0.55 | 1.03 | 1.03 | 1.09 | 0.89  | 0.83 | 1.06 | 0.92 | 1.11 | 1.16  | 0.45 |
| 0.96 | 0.18 | 1.01 | 0.93 | 1.17  | 0.76 | 0.91 | 0.8  | 0.93 | 0.41  | 1.33 |
| 1.14 | 1.31 | 1.04 | 1.08 | 0.75  | 0.96 | 1.02 | 0.97 | 1.09 | 1.13  | 1.64 |
| 0.9  | 1.4  | 0.92 | 0.76 | 0.81  | 0.91 | 1.01 | 1.43 | 0.87 | 0.77  | 1.28 |
| 1.28 | 1.08 | 1.02 | 1.07 | 0.44  | 0.67 | 0.6  | 0.98 | 0.91 | 4.83  | 0.36 |
| 0.87 | 1.06 | 1.07 | 0.91 | 0.98  | 0.74 | 1.5  | 0.95 | 0.95 | 0.72  | 1    |
| 0.93 | 1.34 | 0.92 | 0.87 | 0.68  | 0.84 | 0.96 | 1    | 1.05 | 1.21  | 2.79 |
| 1.22 | 1.17 | 0.79 | 1.35 | 42.28 | 2.21 | 1.15 | 0.74 | 1.15 | 5.22  | 1.95 |
| 2.17 | 6.91 | 0.74 | 1.21 | 0.35  | 0.76 | 1.15 | 1.15 | 1.87 | 0.24  | 2.45 |
| 1.12 | 1.21 | 0.91 | 0.92 | 1.71  | 1.33 | 1.28 | 1.27 | 0.87 | 0.76  | 1.6  |
| 0.89 | 0.87 | 0.78 | 1.24 | 1.49  | 0.68 | 1.02 | 0.5  | 0.91 | 1.34  | 6.7  |
| 0.91 | 1.1  | 1.63 | 1.28 | 1.32  | 0.93 | 1.15 | 0.64 | 1.08 | 0.08  | 3.01 |
| 1.04 | 2.04 | 0.96 | 0.9  | 1.93  | 0.84 | 1.13 | 0.84 | 0.98 | 1.03  | 1.36 |
| 1.12 | 1.48 | 0.99 | 1.03 | 0.8   | 1.24 | 0.99 | 1.02 | 1.17 | 0.97  | 1.27 |
| 0.94 | 2.54 | 1.1  | 1.05 | 0.72  | 1.33 | 1.19 | 1.02 | 0.85 | 1.49  | 4.44 |
| 0.76 | 1.12 | 0.93 | 1.16 | 1.1   | 0.82 | 1.17 | 0.8  | 1.2  | 0.69  | 0.63 |
| 1.75 | 2.43 | 0.87 | 0.78 | 0.68  | 1.14 | 1.31 | 1.99 | 1.09 | 0.55  | 2.09 |
| 0.79 | 0.68 | 1.13 | 1.6  | 0.72  | 0.75 | 1.24 | 1.05 | 1.27 | 3.21  | 2.11 |
| 0.54 | 0.57 | 1.16 | 0.32 | 0.27  | 1.99 | 0.44 | 0.44 | 1.32 | 14.29 | 5.62 |
| 0.92 | 1.3  | 0.92 | 0.98 | 0.64  | 1.27 | 0.66 | 0.97 | 0.88 | 1.18  | 0.85 |
| 0.92 | 1.32 | 0.99 | 0.81 | 0.11  | 0.94 | 0.95 | 0.77 | 0.78 | 7.74  | 1.19 |
| 1.88 | 2.02 | 0.98 | 2.48 | 1.44  | 1.4  | 2    | 0.73 | 1.57 | 1.82  | 3.68 |

|      |      |      |      |       |      |      |      |      |      |      |
|------|------|------|------|-------|------|------|------|------|------|------|
| 0.83 | 0.78 | 0.96 | 0.76 | 0.86  | 1.07 | 0.98 | 0.96 | 0.93 | 0.79 | 0.68 |
| 0.93 | 1.04 | 1.01 | 0.89 | 1.17  | 1.06 | 1.26 | 1.12 | 0.87 | 1.34 | 1.02 |
| 1.39 | 0.86 | 2.13 | 1.01 | 1.02  | 2.45 | 1.47 | 1.23 | 3.14 | 0.67 | 0.92 |
| 0.97 | 0.31 | 0.93 | 1.19 | 0.45  | 0.59 | 0.84 | 0.55 | 0.75 | 1.74 | 0.13 |
| 0.49 | 1.04 | 0.98 | 0.96 | 0.82  | 0.73 | 0.82 | 0.71 | 0.75 | 1.65 | 0.98 |
| 0.85 | 1.06 | 1.07 | 1.08 | 1.32  | 1.28 | 1.06 | 1    | 1.09 | 1.12 | 1.68 |
| 0.91 | 3.51 | 1.05 | 1.1  | 0.89  | 1.25 | 1.1  | 1    | 0.91 | 1.17 | 1.18 |
| 0.85 | 0.76 | 1.04 | 1.12 | 1.09  | 1.07 | 0.84 | 0.93 | 1.01 | 1.46 | 0.87 |
| 1.2  | 3.35 | 1.01 | 1.05 | 0.78  | 1.24 | 1.58 | 0.74 | 0.93 | 2.02 | 1.56 |
| 1.3  | 1.05 | 1.03 | 0.85 | 0.57  | 1.08 | 1.14 | 1.07 | 0.65 | 2.32 | 0.51 |
| 0.89 | 1.09 | 1    | 0.89 | 0.87  | 1.25 | 1.04 | 0.92 | 1.06 | 2.04 | 1.67 |
| 0.35 | 6.2  | 0.77 | 0.76 | 14.57 | 1.69 | 0.31 | 6.17 | 4.6  | 0.75 | 2.13 |
| 1.14 | 1.38 | 1.07 | 1.21 | 0.89  | 1.35 | 1.12 | 0.79 | 1.45 | 1.43 | 1.53 |
| 1.05 | 2.41 | 1.18 | 0.87 | 0.76  | 1.16 | 1.94 | 0.88 | 1.41 | 1.82 | 0.44 |

| 219041_s_at | 200603_at | 218902_at | 204798_at | 205407_at | 204531_s_at | 209341_s_at | 200608_s_at | 202092_s_at | 202431_s_at | 200670_at |
|-------------|-----------|-----------|-----------|-----------|-------------|-------------|-------------|-------------|-------------|-----------|
| 1.18        | 1.01      | 1.27      | 1.93      | 8.89      | 1           | 1.02        | 0.86        | 1.16        | 1.04        | 1.09      |
| 0.65        | 1.24      | 1.02      | 1.54      | 0.98      | 0.98        | 1.16        | 1           | 0.97        | 0.41        | 1.21      |
| 1.16        | 1.78      | 1.77      | 1.06      | 0.47      | 1.79        | 1.85        | 1.57        | 1.04        | 1.13        | 1.07      |
| 1.06        | 0.93      | 1.36      | 1.04      | 9.11      | 1.01        | 1.14        | 0.76        | 0.99        | 1.17        | 1         |
| 0.65        | 1.19      | 1.27      | 1.16      | 0.72      | 1.22        | 1.51        | 1.21        | 1.21        | 1.22        | 1.13      |
| 0.84        | 1         | 0.91      | 0.7       | 2.54      | 1.04        | 0.71        | 1.14        | 1.23        | 735.49      | 1.23      |
| 1.59        | 0.9       | 0.34      | 0.07      | 3.48      | 0.85        | 1.34        | 0.83        | 1.48        | 0.85        | 1.39      |
| 1.01        | 0.97      | 1.05      | 0.9       | 0.6       | 1.02        | 0.95        | 0.88        | 1.16        | 1.08        | 0.88      |
| 0.62        | 0.9       | 0.77      | 0.6       | 1.1       | 1.03        | 1           | 0.86        | 1.06        | 0.82        | 0.95      |
| 0.57        | 0.71      | 1.23      | 0.27      | 0.58      | 0.69        | 0.75        | 1.2         | 1.08        | 1.95        | 1.44      |
| 1.53        | 0.87      | 1.3       | 1.17      | 1.63      | 1.26        | 1.27        | 0.86        | 0.81        | 0.89        | 0.67      |
| 0.87        | 0.99      | 0.9       | 1.25      | 0.98      | 0.9         | 1.1         | 1.03        | 1.22        | 0.97        | 0.9       |
| 0.98        | 1.09      | 0.96      | 0.85      | 0.52      | 0.91        | 1.16        | 1.14        | 0.98        | 1.03        | 1.42      |
| 0.1         | 0.01      | 0.65      | 2.15      | 0.44      | 0.13        | 0.26        | 0.98        | 0.24        | 0.15        | 0.1       |
| 1.05        | 1.38      | 0.72      | 0.85      | 1.48      | 0.66        | 1.47        | 1.1         | 1.98        | 1.71        | 1.48      |
| 0.76        | 1.18      | 0.87      | 1.76      | 1.13      | 0.72        | 1.21        | 0.86        | 0.99        | 0.92        | 1.3       |
| 0.87        | 0.98      | 1.15      | 2.98      | 1.03      | 1.02        | 1.25        | 0.86        | 1.07        | 0.83        | 0.74      |
| 1.23        | 1.16      | 1.52      | 4.28      | 0.93      | 0.83        | 1.05        | 1.03        | 1.17        | 0.74        | 1.13      |
| 0.65        | 1.24      | 6.36      | 0.53      | 1.35      | 0.91        | 1.32        | 1.16        | 1.06        | 0.22        | 0.72      |
| 0.71        | 0.5       | 0.57      | 1.27      | 10.58     | 0.5         | 1.39        | 0.54        | 0.98        | 0.74        | 1.43      |
| 1.52        | 0.82      | 1.06      | 1.26      | 1.6       | 0.51        | 0.49        | 0.8         | 2.49        | 0.49        | 1.44      |
| 1.04        | 0.81      | 1.18      | 2.98      | 0.82      | 0.53        | 0.93        | 0.56        | 1.47        | 0.88        | 0.95      |
| 0.88        | 0.98      | 0.75      | 1.57      | 1.17      | 0.67        | 1.07        | 0.94        | 0.84        | 1.41        | 0.76      |
| 2.21        | 1.24      | 0.28      | 1.07      | 4.89      | 1.11        | 1.21        | 0.98        | 0.75        | 0.75        | 1.18      |
| 0.35        | 0.78      | 0.52      | 0.04      | 0.09      | 0.41        | 1.79        | 1           | 1.14        | 6.79        | 0.89      |
| 1.26        | 0.94      | 1.86      | 0.44      | 1.54      | 0.55        | 0.85        | 0.83        | 0.97        | 0.76        | 0.9       |
| 0.86        | 1         | 0.88      | 10.86     | 1.03      | 1.19        | 1.14        | 0.76        | 1.12        | 0.76        | 1.01      |
| 0.88        | 0.87      | 0.59      | 1.54      | 0.74      | 0.38        | 0.97        | 0.55        | 2.34        | 1.03        | 1.65      |
| 2           | 1.5       | 1.47      | 3.77      | 0.84      | 1.41        | 0.5         | 0.9         | 0.83        | 3.43        | 0.93      |
| 1.26        | 0.82      | 1.27      | 0.91      | 0.79      | 0.86        | 0.83        | 0.92        | 0.9         | 3.16        | 0.77      |

|      |       |      |       |       |      |      |      |      |        |      |
|------|-------|------|-------|-------|------|------|------|------|--------|------|
| 0.96 | 0.89  | 0.62 | 0.75  | 0.63  | 0.99 | 0.69 | 0.94 | 0.98 | 1.37   | 1.1  |
| 2.24 | 21.99 | 0.83 | 1.25  | 2.21  | 3.42 | 3.19 | 1.65 | 0.97 | 4.73   | 2.09 |
| 1.14 | 1.27  | 1.12 | 0.95  | 1.33  | 1.83 | 1.26 | 1.06 | 0.96 | 0.71   | 0.94 |
| 1.19 | 0.85  | 0.4  | 6.78  | 0.38  | 1.79 | 0.76 | 1.22 | 0.76 | 0.55   | 0.95 |
| 2.52 | 2.8   | 0.47 | 0.86  | 0.03  | 4.46 | 2.42 | 4.16 | 0.49 | 1.69   | 0.81 |
| 1.26 | 1.2   | 5.39 | 1.55  | 0.86  | 0.74 | 0.78 | 0.6  | 0.78 | 1.53   | 0.96 |
| 0.92 | 0.83  | 2.09 | 1.17  | 0.2   | 1.8  | 0.93 | 0.96 | 0.58 | 0.97   | 0.76 |
| 1.22 | 0.99  | 1    | 0.8   | 0.85  | 0.82 | 0.78 | 0.98 | 1.1  | 1.17   | 1    |
| 0.89 | 1.12  | 0.71 | 0.37  | 7.07  | 1.08 | 0.89 | 1.1  | 1.39 | 0.55   | 1.24 |
| 0.8  | 0.71  | 0.4  | 0.03  | 2.47  | 1.07 | 1.88 | 0.71 | 1.05 | 0.48   | 0.48 |
| 0.87 | 0.94  | 0.99 | 1.11  | 1.03  | 0.98 | 1.12 | 0.98 | 1.11 | 0.71   | 0.84 |
| 1.08 | 0.97  | 1.66 | 0.99  | 1.27  | 1.04 | 0.95 | 1.02 | 1.02 | 0.47   | 0.88 |
| 1.78 | 1.23  | 0.76 | 1.06  | 1.57  | 0.14 | 1.41 | 1.13 | 0.86 | 0.44   | 1.9  |
| 1.73 | 1.5   | 1.64 | 1.51  | 0.56  | 1.53 | 1.49 | 0.76 | 1.13 | 2.84   | 1.36 |
| 1.8  | 1.12  | 0.86 | 0.92  | 1.64  | 0.49 | 1.22 | 1.08 | 0.89 | 0.6    | 1.66 |
| 1    | 1.1   | 1.06 | 1.35  | 16.03 | 1.21 | 1.59 | 0.92 | 0.81 | 1.23   | 1.05 |
| 1.02 | 0.96  | 0.86 | 1.04  | 1.58  | 1.18 | 1.14 | 1.05 | 1.14 | 0.86   | 1.09 |
| 1.01 | 0.79  | 0.85 | 1.25  | 4.3   | 1.01 | 1.1  | 1.2  | 1.04 | 1.38   | 1.33 |
| 0.99 | 0.97  | 1.2  | 0.85  | 1.03  | 1.02 | 1.06 | 1.08 | 0.84 | 0.9    | 0.98 |
| 1.17 | 0.85  | 1.29 | 2.38  | 2.71  | 0.83 | 0.89 | 1.06 | 0.82 | 6.01   | 1.97 |
| 0.9  | 1.08  | 0.69 | 0.86  | 0.91  | 1.09 | 0.81 | 1.17 | 0.92 | 0.74   | 0.84 |
| 0.97 | 0.89  | 0.86 | 1.71  | Inf   | 0.87 | 1.06 | 0.95 | 0.93 | 5.45   | 0.88 |
| 0.87 | 0.97  | 0.82 | 1.15  | 1.8   | 0.91 | 0.7  | 1.02 | 0.93 | 1.2    | 0.89 |
| 1.07 | 1.14  | 1.02 | 1.05  | 0.95  | 0.82 | 1.13 | 0.91 | 1.24 | 0.64   | 0.89 |
| 0.79 | 0.91  | 1.67 | 0.79  | 0.11  | 0.92 | 0.66 | 0.97 | 1.03 | 1.96   | 1.01 |
| 1.32 | 0.49  | 1.01 | 23.86 | 0.56  | 5.8  | 1.16 | 1.35 | 0.82 | 0.62   | 0.78 |
| 0.8  | 0.55  | 1.08 | 0.68  | 0.66  | 0.52 | 1.15 | 0.46 | 1.51 | 0.59   | 1.13 |
| 1.13 | 0.65  | 0.88 | 1.75  | 0.83  | 2.25 | 2.16 | 0.95 | 1.31 | 0.5    | 1.45 |
| 0.87 | 1.04  | 1.52 | 0.54  | 0.91  | 0.72 | 1.43 | 0.86 | 1.02 | 0.82   | 1.2  |
| 2.82 | 1.25  | 0.86 | 1.23  | 2.19  | 0.4  | 1.22 | 1.23 | 0.76 | 0.46   | 2.01 |
| 0.72 | 1.09  | 0.61 | 0.8   | 1.05  | 0.93 | 0.92 | 0.86 | 1.45 | 0.67   | 1.08 |
| 0.89 | 0.9   | 1.39 | 1.05  | 1.71  | 1.19 | 1.61 | 1.15 | 0.96 | 1.04   | 1.66 |
| 0.98 | 0.95  | 1.53 | 0.6   | 1.12  | 0.79 | 1.02 | 0.89 | 1.07 | 142.34 | 0.93 |

|       |        |      |       |       |       |      |       |      |       |      |
|-------|--------|------|-------|-------|-------|------|-------|------|-------|------|
| 0.99  | 1.22   | 0.72 | 2     | 1.38  | 0.89  | 1.04 | 1.03  | 1.15 | 0.91  | 0.92 |
| 2.16  | 0.86   | 1.81 | 2.41  | 0.77  | 1.33  | 0.99 | 0.91  | 1    | 1.85  | 1.83 |
| 0.97  | 1.14   | 0.74 | 0.96  | 1.43  | 1.03  | 1    | 1.04  | 0.99 | 1     | 0.84 |
| 1.22  | 1.33   | 1.47 | 1.64  | 7.15  | 1.46  | 0.88 | 1.26  | 0.94 | 1.37  | 1.27 |
| 0.94  | 0.96   | 0.99 | 0.88  | 0.98  | 1.17  | 1.21 | 1     | 0.94 | 1.04  | 1.03 |
| 1.37  | 1.24   | 1.69 | 0.99  | 0.37  | 1.04  | 1.65 | 1.18  | 1.7  | 1.04  | 0.54 |
| 1.36  | 0.53   | 1.12 | 0.43  | 3.12  | 0.93  | 0.6  | 0.71  | 2.13 | 1.83  | 0.34 |
| 0.78  | 0.82   | 0.94 | 0.72  | 1.32  | 0.97  | 1.26 | 0.89  | 1.15 | 1.1   | 0.81 |
| 1.31  | 0.7    | 0.75 | 0.73  | 7.64  | 1.04  | 6.85 | 1.19  | 1.5  | 1.08  | 0.95 |
| 1.01  | 1.15   | 1.27 | 1.46  | 7.76  | 0.72  | 1.61 | 1.39  | 0.95 | 0.8   | 1.64 |
| 0.91  | 0.96   | 1.56 | 2.23  | 9.94  | 2.12  | 0.5  | 0.75  | 1.34 | 2.8   | 0.95 |
| 1.22  | 1      | 1.36 | 1.47  | 0.91  | 1.11  | 1.07 | 0.81  | 0.89 | 0.74  | 0.77 |
| 0.98  | 1.2    | 1.34 | 0.83  | 0.74  | 0.6   | 1.35 | 0.68  | 0.9  | 1.33  | 1.27 |
| 1.42  | 1.26   | 1.24 | 1.41  | 1.15  | 1.27  | 0.99 | 1.13  | 0.77 | 2     | 1.36 |
| 1.19  | 0.98   | 0.91 | 1.29  | 1.43  | 0.93  | 0.87 | 0.97  | 1.17 | 1     | 0.57 |
| 10.69 | 476.22 | 0.3  | 0.14  | 24.89 | 50.09 | 9.99 | 18.84 | 0.64 | 52.03 | 1.97 |
| 0.85  | 1.18   | 1.04 | 0.33  | 4.65  | 0.58  | 1.44 | 0.83  | 1.09 | 0.53  | 0.73 |
| 2.47  | 1.26   | 0.89 | 2.86  | 0.79  | 1     | 1.29 | 1.27  | 0.32 | 0.13  | 0.25 |
| 1.38  | 0.98   | 0.79 | 0.85  | 1.24  | 1.29  | 1.21 | 1.11  | 0.91 | 1.22  | 1.31 |
| 1.1   | 0.98   | 2.04 | 0.8   | 4.47  | 1.12  | 1.04 | 0.93  | 1.1  | 1.02  | 0.66 |
| 1.55  | 0.95   | 1.71 | 0.73  | 1.56  | 0.42  | 1.25 | 0.62  | 1.4  | 0.33  | 1.02 |
| 0.88  | 0.81   | 0.94 | 1.35  | 1.04  | 2.16  | 1.2  | 0.93  | 1.17 | 1.17  | 0.78 |
| 1.99  | 0.89   | 0.39 | 0.21  | 2.42  | 0.73  | 0.93 | 1.08  | 1.53 | 0.87  | 1.26 |
| 0.59  | 0.86   | 0.73 | 39.08 | 0.43  | 2.14  | 0.8  | 1.58  | 1.08 | 0.51  | 1.05 |
| 0.97  | 1.04   | 1.17 | 0.87  | 1.56  | 1.2   | 1.17 | 1.06  | 1.1  | 1.04  | 0.83 |
| 1.06  | 1.09   | 0.67 | 0.65  | 1.01  | 0.8   | 0.9  | 1.02  | 1.17 | 1.07  | 1.04 |
| 1.09  | 0.63   | 1.1  | 0.9   | 0.73  | 0.71  | 0.99 | 0.65  | 0.94 | 1.28  | 1.01 |
| 0.94  | 0.93   | 1.51 | 0.95  | 0.81  | 1.04  | 1    | 0.91  | 0.87 | 1.31  | 0.66 |
| 0.86  | 1.01   | 0.98 | 0.91  | 0.91  | 0.82  | 0.79 | 1     | 1.21 | 1.07  | 0.81 |
| 1.07  | 0.92   | 1.05 | 1.2   | 0.97  | 1.35  | 0.89 | 1.01  | 1.02 | 1.03  | 0.99 |
| 1.06  | 1.05   | 1.28 | 0.92  | 0.69  | 0.88  | 1.07 | 0.95  | 1.11 | 0.83  | 1.12 |
| 1.33  | 1.62   | 0.79 | 0.78  | 0.42  | 0.66  | 0.73 | 1.18  | 1.17 | 0.62  | 1.19 |
| 1.1   | 1.22   | 1.37 | 0.95  | 0.88  | 1.01  | 1.39 | 1.14  | 1.12 | 0.77  | 1.13 |

|      |      |      |      |      |      |      |      |      |      |      |
|------|------|------|------|------|------|------|------|------|------|------|
| 1.08 | 0.86 | 1    | 1.19 | 2.43 | 0.99 | 1.31 | 1.24 | 0.92 | 2.26 | 1.11 |
| 1    | 1.04 | 1.17 | 0.82 | 0.49 | 0.95 | 0.83 | 0.94 | 0.88 | 0.92 | 0.88 |
| 0.77 | 1.09 | 1.18 | 1.09 | 1.62 | 1.12 | 0.75 | 1.09 | 1.64 | 1.59 | 1    |
| 1.18 | 0.78 | 1.3  | 0.89 | 5.38 | 0.65 | 4.71 | 1.21 | 1.08 | 0.6  | 0.75 |
| 1.42 | 1.61 | 0.86 | 1.67 | 0.66 | 0.99 | 1.72 | 1.68 | 1.67 | 1.17 | 0.62 |
| 0.63 | 0.8  | 0.65 | 0.71 | 1.02 | 0.47 | 0.5  | 0.2  | 1.18 | 0.62 | 0.4  |
| 1.75 | 0.86 | 0.81 | 0.76 | 0.54 | 0.8  | 1.47 | 0.89 | 0.93 | 1.52 | 2.08 |
| 1.11 | 2.44 | 0.87 | 1.27 | 1.38 | 0.99 | 0.94 | 1.61 | 0.62 | 0.71 | 0.89 |
| 0.49 | 1.14 | 0.86 | 0.49 | 2.83 | 0.95 | 0.57 | 1    | 0.65 | 1.65 | 0.57 |
| 1.4  | 0.93 | 0.97 | 0.82 | 0.7  | 0.86 | 1.01 | 0.92 | 1    | 1.39 | 1.16 |
| 1.64 | 1    | 1.06 | 2.41 | 0.82 | 0.92 | 0.91 | 1.12 | 0.97 | 0.65 | 0.98 |
| 1.12 | 0.95 | 1.31 | 1.99 | 2.26 | 1.18 | 1.14 | 1.09 | 1.12 | 1.26 | 1.07 |
| 0.93 | 0.98 | 1.78 | 1.56 | 0.81 | 1.32 | 0.73 | 1.09 | 0.69 | 1.03 | 0.98 |
| 1.04 | 0.86 | 0.57 | 5.13 | 0.54 | 1.99 | 0.87 | 1.27 | 0.95 | 0.84 | 1.28 |
| 1.13 | 1.23 | 0.99 | 0.91 | 1.19 | 0.86 | 1.26 | 1.16 | 0.92 | 2.56 | 1.07 |
| 0.95 | 0.94 | 1.79 | 0.96 | 1.22 | 1.09 | 1.24 | 1.27 | 0.82 | 1.01 | 1.03 |
| 1.13 | 1.01 | 1.24 | 1    | 1.05 | 0.76 | 0.92 | 1.03 | 0.48 | 1.32 | 2.07 |
| 1.32 | 1.04 | 1.76 | 1.39 | 4.76 | 1.46 | 1.19 | 1.01 | 0.98 | 1.75 | 1.47 |
| 0.93 | 0.8  | 1.13 | 0.88 | 0.71 | 0.75 | 1.2  | 0.84 | 1.04 | 0.97 | 1.18 |
| 0.82 | 0.91 | 1.47 | 2.12 | 2.39 | 1.38 | 0.7  | 1.92 | 0.78 | 0.81 | 1.62 |
| 1.09 | 1.23 | 1.03 | 0.47 | 1.46 | 1.16 | 0.98 | 1.4  | 0.93 | 0.85 | 1.23 |
| 1.13 | 0.95 | 1.18 | 0.94 | 0.75 | 0.91 | 0.71 | 0.92 | 1.46 | 1.09 | 0.96 |
| 1.13 | 1.26 | 1.13 | 1.34 | 0.42 | 0.81 | 1.1  | 1.1  | 1.15 | 1.21 | 1.17 |
| 1.22 | 0.72 | 2.95 | 0.69 | 0.29 | 1.02 | 1.86 | 1.13 | 0.88 | 1.73 | 1.01 |
| 1.27 | 0.77 | 1.7  | 1.25 | 0.75 | 0.98 | 0.88 | 0.81 | 0.99 | 0.87 | 0.81 |
| 0.92 | 0.81 | 0.54 | 1.44 | 0.96 | 0.95 | 1.08 | 1.08 | 0.86 | 1.76 | 0.6  |
| 1.05 | 1.04 | 1.01 | 1.02 | 2.57 | 0.77 | 1.29 | 0.98 | 1.04 | 1.23 | 0.83 |
| 0.96 | 1.2  | 1.5  | 2.5  | 1.98 | 1.26 | 1.33 | 1.18 | 1.02 | 2.06 | 1.77 |
| 0.61 | 0.7  | 0.51 | 1.39 | 0.72 | 3.85 | 0.79 | 0.89 | 1.26 | 1.32 | 1.37 |
| 0.84 | 1    | 1.12 | 0.94 | 0.92 | 1.11 | 0.82 | 1.09 | 0.86 | 0.9  | 1.03 |
| 0.97 | 0.99 | 1.12 | 0.82 | 0.61 | 0.91 | 0.84 | 1.09 | 1.04 | 1.04 | 0.79 |
| 2.16 | 0.86 | 1.81 | 2.41 | 0.77 | 1.33 | 0.99 | 0.91 | 1    | 1.85 | 1.83 |
| 1.54 | 0.93 | 0.89 | 0.7  | 2.24 | 1.03 | 1.09 | 0.97 | 1.41 | 1.59 | 1.56 |

|      |      |      |      |      |      |      |      |      |      |      |
|------|------|------|------|------|------|------|------|------|------|------|
| 0.75 | 1.24 | 0.98 | 1.47 | 1.1  | 0.79 | 0.89 | 0.93 | 1.28 | 1.3  | 0.56 |
| 1.11 | 0.58 | 0.95 | 0.67 | 6.08 | 0.91 | 0.82 | 0.85 | 0.88 | 1.04 | 1.01 |
| 0.79 | 1.05 | 1.23 | 0.75 | 2.45 | 0.73 | 1.09 | 0.82 | 1.35 | 1.12 | 0.96 |
| 1.13 | 1.03 | 1.23 | 0.99 | 0.97 | 0.94 | 0.91 | 0.93 | 1.17 | 1.08 | 1.04 |
| 1.17 | 1.04 | 0.67 | 0.4  | 0.87 | 0.76 | 0.98 | 0.95 | 1.1  | 0.97 | 0.97 |
| 0.88 | 0.99 | 1.04 | 0.52 | 0.89 | 0.91 | 0.9  | 1.01 | 0.96 | 1.1  | 0.92 |
| 0.98 | 1.22 | 1.2  | 0.84 | 0.89 | 0.85 | 1    | 1.06 | 0.88 | 1.19 | 0.8  |
| 1.07 | 1.08 | 1.28 | 0.99 | 1.33 | 1.07 | 0.92 | 1.13 | 0.75 | 0.84 | 1.11 |
| 1.65 | 0.82 | 1.47 | 1.4  | 0.73 | 1.25 | 1.23 | 0.82 | 1.01 | 0.65 | 1.28 |
| 1.11 | 1.17 | 1.38 | 0.87 | 1    | 0.92 | 1.06 | 1.17 | 0.97 | 0.84 | 0.95 |
| 1.06 | 0.92 | 1.05 | 0.42 | 0.8  | 0.87 | 1.14 | 1.08 | 1.22 | 1.09 | 1.04 |
| 1.04 | 1.03 | 0.8  | 1.04 | 2.38 | 0.95 | 1.06 | 1.08 | 1.1  | 1.15 | 0.96 |
| 1.25 | 1.06 | 1.72 | 1.5  | 5.15 | 1.38 | 1.07 | 1.17 | 1.03 | 1.6  | 1.34 |
| 1.05 | 1.11 | 1.53 | 0.85 | 0.87 | 0.76 | 1.09 | 1.09 | 0.76 | 0.93 | 1.35 |
| 0.85 | 1.36 | 0.45 | 1.22 | 1.74 | 0.61 | 1.38 | 1.38 | 0.8  | 0.41 | 0.67 |
| 1.05 | 1.02 | 1.07 | 1.09 | 1.3  | 0.78 | 1.1  | 0.97 | 1.07 | 0.87 | 1.22 |
| 0.98 | 1.01 | 0.89 | 0.83 | 2.15 | 1.09 | 0.91 | 1.08 | 0.88 | 0.92 | 1.19 |
| 0.91 | 0.96 | 1.03 | 1.33 | 0.79 | 2.08 | 0.9  | 1.06 | 0.68 | 2.9  | 1.45 |
| 1.02 | 0.94 | 0.8  | 0.95 | 0.96 | 0.84 | 0.96 | 0.98 | 1.08 | 1.03 | 1.05 |
| 1.13 | 0.88 | 0.85 | 0.35 | 2.2  | 0.99 | 0.84 | 0.85 | 1.73 | 0.77 | 1.53 |
| 1.08 | 0.92 | 1.46 | 0.24 | 1.58 | 0.87 | 1.04 | 1.14 | 0.78 | 0.49 | 1.18 |
| 1.49 | 0.92 | 0.46 | 0.19 | Inf  | 0.77 | 1.21 | 1.05 | 0.71 | 0.46 | 1.17 |
| 0.95 | 1.17 | 1.02 | 1.29 | 1.16 | 1.05 | 1.06 | 0.96 | 1.1  | 0.85 | 0.78 |
| 1.5  | 1.04 | 1.37 | 1.41 | 0.95 | 2.93 | 0.94 | 0.77 | 0.88 | 0.68 | 1.03 |
| 1.01 | 0.94 | 1.32 | 0.53 | 0.97 | 0.42 | 1.38 | 0.79 | 1.21 | 0.94 | 0.92 |
| 1.78 | 1.31 | 1.06 | 4.45 | 0.66 | 2.64 | 1.15 | 0.92 | 0.95 | 0.89 | 0.86 |
| 1.07 | 0.98 | 0.88 | 0.86 | 0.69 | 0.77 | 1.29 | 1.09 | 0.89 | 0.88 | 1.35 |
| 0.96 | 0.95 | 1.25 | 0.67 | 3.08 | 0.84 | 0.82 | 1.12 | 0.82 | 1.4  | 1.02 |
| 0.94 | 1.05 | 1.05 | 0.87 | 0.96 | 1    | 1.07 | 0.95 | 1.1  | 0.67 | 1.09 |
| 0.79 | 0.72 | 0.97 | 0.48 | 1.05 | 0.7  | 1.19 | 1.1  | 1.12 | 0.93 | 0.84 |
| 0.74 | 1.1  | 0.85 | 0.85 | 0.91 | 1.14 | 0.81 | 1.04 | 1    | 0.72 | 0.77 |
| 0.91 | 0.95 | 0.8  | 0.96 | 0.86 | 1.06 | 1.01 | 0.95 | 1    | 1.01 | 0.96 |
| 0.98 | 1    | 0.8  | 0.99 | 1.06 | 1.06 | 1.1  | 0.96 | 0.98 | 0.94 | 1.05 |

|      |      |      |       |       |      |      |      |      |      |      |
|------|------|------|-------|-------|------|------|------|------|------|------|
| 0.88 | 0.89 | 0.69 | 0.97  | 2.89  | 0.79 | 6.69 | 2.07 | 1.06 | 0.81 | 1.59 |
| 0.8  | 1.18 | 0.85 | 1.08  | 0.99  | 1.08 | 0.82 | 1.07 | 0.91 | 0.89 | 0.84 |
| 1.24 | 0.94 | 0.93 | 1.01  | 0.85  | 1.59 | 1.01 | 1.11 | 0.9  | 0.96 | 0.95 |
| 0.86 | 1.96 | 1.34 | 2.34  | 1.04  | 1.49 | 1.19 | 1.56 | 0.78 | 0.77 | 0.99 |
| 0.86 | 0.75 | 0.68 | 2.98  | 1.69  | 1.15 | 0.51 | 1.25 | 0.91 | 0.68 | 1.19 |
| 0.94 | 0.97 | 1.2  | 0.99  | 0.82  | 1.07 | 0.99 | 0.92 | 1.04 | 0.92 | 1.19 |
| 0.97 | 0.98 | 0.66 | 0.81  | 0.7   | 0.94 | 0.7  | 0.91 | 1.06 | 1.4  | 0.98 |
| 1.2  | 0.99 | 1.4  | 0.94  | 1.29  | 1.27 | 0.93 | 1.01 | 0.97 | 2.13 | 1.03 |
| 1.11 | 1.1  | 1.18 | 1.8   | 0.91  | 1.44 | 0.94 | 1.24 | 0.98 | 0.71 | 0.97 |
| 1    | 0.81 | 0.6  | 0.81  | 0.52  | 1.09 | 0.68 | 0.99 | 1.08 | 1.63 | 1.01 |
| 1.07 | 0.96 | 1.18 | 2.28  | 0.95  | 1.6  | 0.73 | 1.21 | 1.02 | 0.9  | 0.45 |
| 0.61 | 1.02 | 0.52 | 0.91  | 0.65  | 1.46 | 0.83 | 1.38 | 0.8  | 0.93 | 0.96 |
| 0.91 | 0.89 | 0.84 | 0.79  | 0.91  | 1.07 | 0.92 | 1.04 | 1.04 | 0.98 | 0.7  |
| 0.78 | 1.04 | 0.93 | 0.98  | 0.93  | 1.03 | 0.91 | 0.98 | 0.87 | 0.92 | 1.27 |
| 1.14 | 0.97 | 1.12 | 1.07  | 1.07  | 0.98 | 0.92 | 0.94 | 1.12 | 0.97 | 1.04 |
| 1.03 | 1.25 | 0.71 | 0.67  | 0.92  | 1.06 | 1.06 | 1.17 | 1.07 | 1.52 | 1.21 |
| 1.03 | 0.96 | 1.14 | 0.83  | 0.92  | 0.97 | 1.19 | 1.01 | 1.2  | 0.86 | 1.01 |
| 0.96 | 1.03 | 1.17 | 0.92  | 0.91  | 1    | 0.78 | 0.94 | 0.88 | 0.97 | 0.96 |
| 1    | 1.27 | 0.93 | 1.37  | 1.12  | 1.92 | 1.21 | 1.19 | 0.85 | 1.24 | 0.99 |
| 0.62 | 1.2  | 0.8  | 1.19  | 1.18  | 1.17 | 1.12 | 1.14 | 1.08 | 0.99 | 0.6  |
| 0.9  | 0.91 | 2.1  | 1.35  | 1.64  | 0.79 | 1    | 0.93 | 0.94 | 1.01 | 0.79 |
| 1.46 | 0.89 | 1.09 | 5.83  | 0.35  | 2.03 | 0.57 | 0.74 | 1.2  | 1.33 | 1.9  |
| 0.79 | 1.01 | 0.89 | 1.07  | 0.76  | 0.91 | 0.96 | 0.95 | 0.88 | 1.34 | 1.04 |
| 0.85 | 1.08 | 0.98 | 0.88  | 0.52  | 1.28 | 3.2  | 1.54 | 0.84 | 0.89 | 1.12 |
| 0.91 | 0.85 | 0.87 | 0.81  | 0.88  | 1.01 | 1.13 | 0.9  | 0.97 | 1.27 | 1.62 |
| 1.37 | 1.8  | 1.75 | 1.97  | 2.52  | 0.88 | 1.07 | 0.96 | 0.71 | 0.27 | 1.65 |
| 1.4  | 0.92 | 1    | 0.87  | 1.21  | 1    | 0.87 | 1.12 | 1.02 | 0.84 | 1.1  |
| 0.91 | 0.95 | 1.14 | 1.04  | 0.88  | 0.94 | 0.95 | 0.87 | 1.06 | 0.93 | 1.01 |
| 1.03 | 0.96 | 0.97 | 0.99  | 1.01  | 1.16 | 1.12 | 1.13 | 0.87 | 0.93 | 1.11 |
| 1.17 | 0.94 | 1.02 | 0.99  | 0.93  | 0.82 | 0.84 | 0.96 | 0.63 | 0.86 | 0.93 |
| 0.83 | 0.87 | 0.89 | 0.96  | 17.28 | 0.56 | 1.16 | 0.99 | 1.16 | 1.49 | 0.86 |
| 0.86 | 1.1  | 0.88 | 0.79  | 1.58  | 0.9  | 0.84 | 1.05 | 0.93 | 0.88 | 0.91 |
| 1.23 | 1    | 1.23 | 10.67 | 2.91  | 0.6  | 1    | 0.86 | 1.67 | 0.75 | 0.79 |



|      |      |      |       |       |      |      |      |      |       |      |
|------|------|------|-------|-------|------|------|------|------|-------|------|
| 1.16 | 1.02 | 1.13 | 0.46  | 1.18  | 0.63 | 1.18 | 0.98 | 1.02 | 0.74  | 0.88 |
| 1.45 | 1.14 | 1.4  | 1.35  | 0.51  | 1.48 | 0.94 | 1.25 | 1.35 | 1.34  | 1.72 |
| 1.51 | 0.99 | 0.85 | 0.62  | Inf   | 0.71 | 0.83 | 1    | 0.78 | 0.78  | 0.94 |
| 0.65 | 0.99 | 0.63 | 0.54  | 0.98  | 1.75 | 0.62 | 0.85 | 0.91 | 0.87  | 0.94 |
| 0.78 | 0.94 | 1.04 | 0.98  | 1.25  | 2.21 | 0.93 | 1.19 | 0.73 | 0.93  | 1.67 |
| 1.04 | 0.97 | 1.04 | 0.85  | 1.2   | 1.07 | 0.94 | 1.02 | 1.03 | 0.95  | 0.78 |
| 0.93 | 1.22 | 0.56 | 0.45  | 3.79  | 1.09 | 0.99 | 1.14 | 0.99 | 0.8   | 1.2  |
| 1.01 | 0.98 | 0.63 | 0.77  | 0.98  | 0.93 | 0.8  | 0.9  | 1.37 | 0.78  | 1.06 |
| 1.15 | 0.9  | 0.82 | 0.86  | 0.69  | 1.1  | 3.39 | 1.54 | 0.82 | 0.83  | 1.17 |
| 1.18 | 1.51 | 1.16 | 0.69  | 4.19  | 0.75 | 0.94 | 0.93 | 1.13 | 0.41  | 1.06 |
| 1.17 | 1.24 | 0.32 | 0.93  | 0.82  | 0.91 | 0.77 | 1.1  | 1.23 | 1.1   | 1.32 |
| 1.14 | 1.03 | 0.91 | 1.03  | 0.82  | 0.95 | 0.83 | 1.22 | 1.1  | 0.89  | 1.13 |
| 1    | 1.12 | 0.83 | 0.71  | 0.78  | 0.97 | 0.76 | 0.97 | 0.71 | 1.17  | 0.63 |
| 0.91 | 1.13 | 1.11 | 0.81  | 0.84  | 0.99 | 0.96 | 1.27 | 0.94 | 0.75  | 0.92 |
| 0.78 | 1.24 | 1    | 0.46  | 0.84  | 0.54 | 0.91 | 0.91 | 1.19 | 0.81  | 1    |
| 1.17 | 0.82 | 0.9  | 0.87  | 0.38  | 1.36 | 0.67 | 1.21 | 0.78 | 0.44  | 0.92 |
| 0.73 | 0.86 | 1.47 | 0.79  | 0.69  | 0.91 | 0.74 | 0.9  | 0.99 | 0.98  | 1.02 |
| 0.89 | 0.91 | 0.7  | 0.67  | 0.9   | 0.99 | 0.84 | 0.87 | 0.95 | 0.68  | 0.81 |
| 0.79 | 0.77 | 1.06 | 0.48  | 0.88  | 0.71 | 2.21 | 0.65 | 1.5  | 42.28 | 0.66 |
| 2.78 | 1.74 | 0.4  | 0.42  | 24.94 | 0.7  | 0.76 | 1.46 | 1.46 | 0.35  | 0.63 |
| 0.86 | 0.9  | 1.07 | 1.57  | 0.53  | 0.62 | 1.33 | 0.76 | 0.68 | 1.71  | 1.03 |
| 0.98 | 0.81 | 0.6  | 0.76  | 0.54  | 1.07 | 0.68 | 0.97 | 0.99 | 1.49  | 1.11 |
| 1.1  | 0.79 | 0.56 | 11.22 | 0.46  | 4.72 | 0.93 | 0.96 | 1.79 | 1.32  | 2.29 |
| 0.65 | 0.84 | 0.53 | 1.18  | 1.95  | 0.31 | 0.84 | 0.76 | 1.29 | 1.93  | 1.28 |
| 1.09 | 0.96 | 1.1  | 0.67  | 1.54  | 0.77 | 1.24 | 1    | 1.05 | 0.8   | 0.76 |
| 0.96 | 0.97 | 1.04 | 0.68  | 1.04  | 0.76 | 1.33 | 0.72 | 0.9  | 0.72  | 0.92 |
| 0.54 | 1.39 | 1.18 | 1.23  | 0.82  | 0.85 | 0.82 | 1.18 | 1.05 | 1.1   | 0.67 |
| 1.27 | 1.12 | 0.49 | 0.6   | 3.16  | 0.89 | 1.14 | 1.35 | 1.19 | 0.68  | 1.33 |
| 0.69 | 0.93 | 0.7  | 1.54  | 0.63  | 1.22 | 0.75 | 0.82 | 0.76 | 0.72  | 0.81 |
| 4.2  | 0.91 | 3    | 2.9   | 1.44  | 0.41 | 1.99 | 0.46 | 1.35 | 0.27  | 0.74 |
| 0.58 | 0.89 | 0.71 | 1.41  | 1.24  | 0.88 | 1.27 | 0.79 | 0.95 | 0.64  | 0.45 |
| 0.59 | 1.3  | 1.1  | 0.44  | 2.12  | 0.97 | 0.94 | 1.18 | 0.92 | 0.11  | 0.88 |
| 1.06 | 0.88 | 1.81 | 1.41  | 0.41  | 0.93 | 1.4  | 0.75 | 1.16 | 1.44  | 1.03 |

|      |        |      |      |      |      |      |        |       |       |       |
|------|--------|------|------|------|------|------|--------|-------|-------|-------|
| 0.92 | 1.13   | 1    | 0.65 | 0.94 | 0.97 | 1.07 | 1.17   | 0.92  | 0.86  | 0.97  |
| 1.01 | 1.03   | 0.79 | 1.27 | 1.15 | 1.02 | 1.06 | 0.91   | 1.05  | 1.17  | 1.37  |
| 0.99 | 15.8   | 0.96 | 3.26 | 0.08 | 2.61 | 2.45 | 23.95  | 0.83  | 1.02  | 3.32  |
| 2.83 | 1      | 0.96 | 0.62 | 0.56 | 1.68 | 0.59 | 0.98   | 0.6   | 0.45  | 1.03  |
| 1.4  | 0.93   | 0.97 | 1.25 | 2.53 | 1.05 | 0.73 | 1.09   | 1.22  | 0.82  | 1.05  |
| 1.17 | 1.11   | 1.07 | 2.41 | 1.27 | 1.47 | 1.28 | 0.96   | 0.97  | 1.32  | 0.97  |
| 0.88 | 1.22   | 1.11 | 1.13 | 0.84 | 1.19 | 1.25 | 1.07   | 0.99  | 0.89  | 0.91  |
| 1.2  | 0.92   | 1.32 | 3.29 | 0.58 | 1.06 | 1.07 | 1.04   | 1.17  | 1.09  | 1     |
| 0.84 | 1.09   | 1.38 | 1.26 | 2.63 | 0.81 | 1.24 | 1.1    | 1.2   | 0.78  | 0.82  |
| 0.68 | 0.99   | 0.9  | 0.83 | 1.13 | 1.06 | 1.08 | 1.11   | 0.98  | 0.57  | 1.05  |
| 0.97 | 1.01   | 1.05 | 0.6  | 1.53 | 1.32 | 1.25 | 0.92   | 0.94  | 0.87  | 1.43  |
| 0.04 | 114.69 | 3.33 | 2.33 | 6.27 | 4.96 | 1.69 | 181.72 | 11.77 | 14.57 | 44.84 |
| 0.92 | 0.94   | 0.87 | 1.72 | 0.86 | 0.94 | 1.35 | 1.08   | 1.01  | 0.89  | 0.84  |
| 1.7  | 1.17   | 0.76 | 2.28 | 1.3  | 0.86 | 1.16 | 1.13   | 0.65  | 0.76  | 0.75  |

| 209341_s_at | 219195_at | 201746_at | 220070_at | 201984_s_at | 203739_at | 212377_s_at | 204178_s_at | 213342_at | 202431_s_at | 213906_at |
|-------------|-----------|-----------|-----------|-------------|-----------|-------------|-------------|-----------|-------------|-----------|
| 1.02        | 5.28      | 0.92      | 1.09      | 1.36        | 0.98      | 1.04        | 1.08        | 1.02      | 1.04        | 1.16      |
| 1.16        | 1.39      | 0.88      | 0.94      | 1.16        | 0.82      | 0.65        | 1.26        | 2.17      | 0.41        | 0.88      |
| 1.85        | 1         | 0.94      | 1.05      | 1.96        | 1.27      | 0.68        | 0.86        | 2.24      | 1.13        | 6.87      |
| 1.14        | 4.86      | 1.02      | 2.13      | 2.77        | 0.8       | 0.96        | 1.59        | 1.37      | 1.17        | 1.48      |
| 1.51        | 1.92      | 0.89      | 5.09      | 1.11        | 1.07      | 1.33        | 1           | 1.07      | 1.22        | 1.13      |
| 0.71        | 2.15      | 0.95      | 3.33      | 3.33        | 1.5       | 1.15        | 1.82        | 3.76      | 735.49      | 1.05      |
| 1.34        | 0.29      | 0.14      | 1.48      | 0.55        | 1.34      | 1.08        | 1.17        | 1.04      | 0.85        | 2.09      |
| 0.95        | 2.36      | 1.36      | 1.49      | 0.53        | 0.81      | 1.24        | 1.33        | 3.5       | 1.08        | 1.24      |
| 1           | 0.93      | 0.82      | 1.73      | 0.75        | 0.96      | 1.06        | 0.75        | 1.01      | 0.82        | 1.04      |
| 0.75        | 8.72      | 1.42      | 1.25      | 1.39        | 1.24      | 0.61        | 1.27        | 1.04      | 1.95        | 1.61      |
| 1.27        | 1.52      | 0.68      | 0.8       | 0.91        | 0.74      | 0.88        | 0.86        | 0.63      | 0.89        | 1.06      |
| 1.1         | 1.26      | 0.93      | 2.39      | 0.87        | 0.92      | 0.79        | 1.41        | 1.22      | 0.97        | 1.63      |
| 1.16        | 1.5       | 1.26      | 1.83      | 0.78        | 1.23      | 1.08        | 1.13        | 0.91      | 1.03        | 0.93      |
| 0.26        | 30.01     | 0.19      | 1.27      | 0.34        | 0.34      | 0.28        | 3.52        | 0.47      | 0.15        | 4.15      |
| 1.47        | 2.91      | 1.11      | 1.06      | 0.89        | 1.39      | 0.9         | 1.23        | 1.04      | 1.71        | 0.67      |
| 1.21        | 3.93      | 1.33      | 0.96      | 0.48        | 0.73      | 0.79        | 1.01        | 1.26      | 0.92        | 0.99      |
| 1.25        | 0.12      | 0.99      | 0.6       | 1.6         | 0.97      | 0.94        | 1.1         | 0.94      | 0.83        | 2.25      |
| 1.05        | 0.54      | 1.13      | 1.02      | 0.8         | 1.13      | 1.48        | 1.01        | 1.36      | 0.74        | 1.07      |
| 1.32        | 0.67      | 0.1       | 1.15      | 0.48        | 0.98      | 0.96        | 0.97        | 2.72      | 0.22        | 0.64      |
| 1.39        | 1.19      | 0.96      | 0.86      | 1.49        | 0.67      | 1.12        | 0.82        | 0.93      | 0.74        | 0.52      |
| 0.49        | 0.36      | 1.87      | 3.24      | 2.99        | 1.18      | 0.41        | 1.83        | 0.88      | 0.49        | 0.99      |
| 0.93        | 15.33     | 3.15      | 0.62      | 2.25        | 0.6       | 1.14        | 1.02        | 0.53      | 0.88        | 0.84      |
| 1.07        | 5.78      | 1.32      | 0.97      | 0.8         | 1         | 0.99        | 0.89        | 0.87      | 1.41        | 0.77      |
| 1.21        | 0.5       | 0.95      | 1.1       | 0.59        | 1.26      | 1.38        | 1.21        | 0.78      | 0.75        | 1.82      |
| 1.79        | 0.06      | 0.63      | 0.67      | 3.23        | 1.96      | 0.93        | 0.82        | 1.35      | 6.79        | 8.39      |
| 0.85        | 0.19      | 1.11      | 1.23      | 0.94        | 0.79      | 1.3         | 1.26        | 1.07      | 0.76        | 0.99      |
| 1.14        | 0.57      | 1.93      | 1.62      | 1.16        | 0.84      | 0.78        | 0.77        | 0.87      | 0.76        | 0.98      |
| 0.97        | 1.51      | 6.62      | 0.82      | 2.11        | 0.71      | 1.07        | 0.85        | 0.67      | 1.03        | 0.49      |
| 0.5         | 1.08      | 0.15      | 1.25      | 0.8         | 1.88      | 0.45        | 1.04        | 0.51      | 3.43        | 0.46      |
| 0.83        | 0.97      | 0.73      | 0.91      | 0.67        | 0.95      | 1.28        | 1.01        | 1.32      | 3.16        | 1.5       |

|      |       |      |      |       |      |       |      |      |        |      |
|------|-------|------|------|-------|------|-------|------|------|--------|------|
| 0.69 | 5.58  | 0.56 | 0.89 | 2.15  | 0.55 | 0.74  | 1.21 | 5.19 | 1.37   | 0.85 |
| 3.19 | 29.66 | 1.38 | 3.29 | 1.7   | 4.62 | 3.03  | 6    | 1.16 | 4.73   | 0.89 |
| 1.26 | 0.97  | 1.07 | 1.98 | 1.01  | 1.03 | 1.05  | 1.01 | 0.96 | 0.71   | 2.29 |
| 0.76 | 2.16  | 1.27 | 1.38 | 0.52  | 0.46 | 0.59  | 1.02 | 0.78 | 0.55   | 3.25 |
| 2.42 | 1.5   | 16   | 0.99 | 38.56 | 0.18 | 0.5   | 0.13 | 40.4 | 1.69   | 4.12 |
| 0.78 | 0.67  | 1.65 | 1.16 | 1.02  | 0.58 | 0.89  | 0.71 | 1.2  | 1.53   | 0.9  |
| 0.93 | 20.97 | 0.57 | 2.81 | 0.13  | 0.61 | 0.8   | 1    | 0.57 | 0.97   | 0.36 |
| 0.78 | 0.07  | 0.88 | 1.42 | 0.87  | 0.85 | 0.95  | 0.72 | 0.88 | 1.17   | 0.94 |
| 0.89 | 0.83  | 1.24 | 0.71 | 0.46  | 1.16 | 0.83  | 0.76 | 0.63 | 0.55   | 0.66 |
| 1.88 | 0.53  | 1.01 | 1.35 | 2.64  | 1.25 | 1.74  | 0.53 | 1.02 | 0.48   | 3.14 |
| 1.12 | 1.75  | 2.01 | 0.47 | 0.74  | 0.7  | 0.95  | 1.25 | 1.08 | 0.71   | 0.68 |
| 0.95 | 1.59  | 0.95 | 0.99 | 1.32  | 0.96 | 11.25 | 0.91 | 0.9  | 0.47   | 1.19 |
| 1.41 | 0.42  | 0.26 | 0.92 | 0.81  | 1.83 | 1.87  | 0.44 | 1.36 | 0.44   | 0.3  |
| 1.49 | 1.4   | 2.55 | 0.53 | 0.84  | 0.72 | 0.97  | 0.64 | 1.62 | 2.84   | 0.18 |
| 1.22 | 0.56  | 0.41 | 0.85 | 0.72  | 1.59 | 1.55  | 0.55 | 1.24 | 0.6    | 0.68 |
| 1.59 | 21.09 | 1.09 | 0.96 | 1.27  | 1.22 | 0.94  | 1.02 | 1.29 | 1.23   | 4.45 |
| 1.14 | 2.33  | 0.97 | 1.34 | 1.02  | 0.98 | 1.05  | 1.05 | 0.84 | 0.86   | 0.87 |
| 1.1  | 4.56  | 0.81 | 0.67 | 1.13  | 0.73 | 1.02  | 0.95 | 1.23 | 1.38   | 1.61 |
| 1.06 | 1.17  | 0.86 | 1.45 | 0.82  | 1.01 | 1.06  | 0.92 | 0.95 | 0.9    | 1.01 |
| 0.89 | 3.49  | 0.69 | 0.83 | 1.48  | 1.12 | 0.96  | 1.39 | 0.83 | 6.01   | 1.58 |
| 0.81 | 3.5   | 0.96 | 0.84 | 0.8   | 1.04 | 0.82  | 0.96 | 0.81 | 0.74   | 0.52 |
| 1.06 | 0.22  | 1.05 | 1.18 | 1.45  | 0.83 | 0.93  | 0.96 | 0.73 | 5.45   | 1.06 |
| 0.7  | 0.51  | 1.09 | 1.42 | 1.35  | 1.11 | 1.12  | 0.94 | 1.18 | 1.2    | 1.12 |
| 1.13 | 1.47  | 0.81 | 0.78 | 1.55  | 0.98 | 1.17  | 1.18 | 2.26 | 0.64   | 0.86 |
| 0.66 | 1.06  | 0.35 | 0.81 | 1.52  | 1.57 | 1.51  | 1.17 | 1.23 | 1.96   | 0.18 |
| 1.16 | 0.12  | 1.48 | 1.27 | 1.23  | 0.7  | 0.75  | 1.66 | 1.26 | 0.62   | 3.85 |
| 1.15 | 0.2   | 0.93 | 1.6  | 6.59  | 1.76 | 0.64  | 2.1  | 1.54 | 0.59   | 0.75 |
| 2.16 | 2.37  | 1.99 | 1.13 | 1.27  | 1.2  | 0.74  | 0.61 | 1.18 | 0.5    | 0.78 |
| 1.43 | 1.49  | 0.25 | 1.23 | 1.2   | 1.21 | 1.26  | 0.79 | 0.95 | 0.82   | 0.56 |
| 1.22 | 0.27  | 0.41 | 0.94 | 0.69  | 2.05 | 1.65  | 0.47 | 1.5  | 0.46   | 0.3  |
| 0.92 | 0.61  | 0.73 | 1.01 | 0.94  | 1.18 | 0.78  | 0.92 | 1.09 | 0.67   | 0.72 |
| 1.61 | 1.38  | 0.79 | 1.75 | 1.36  | 1.74 | 1.73  | 0.85 | 0.98 | 1.04   | 1.53 |
| 1.02 | 0.81  | 1.14 | 1.04 | 1.49  | 0.9  | 0.71  | 0.83 | 1.27 | 142.34 | 0.65 |

|      |       |      |      |      |       |      |      |       |       |       |
|------|-------|------|------|------|-------|------|------|-------|-------|-------|
| 1.04 | 0.25  | 0.91 | 0.62 | 0.9  | 1.16  | 1.17 | 0.9  | 0.98  | 0.91  | 3.26  |
| 0.99 | 4.71  | 1.49 | 2.72 | 0.58 | 1.14  | 0.73 | 1.2  | 0.78  | 1.85  | 2.96  |
| 1    | 2.8   | 0.89 | 1.22 | 1.29 | 1.25  | 1.61 | 1.03 | 0.98  | 1     | 1.59  |
| 0.88 | 1.42  | 0.87 | 1.41 | 1.22 | 1.06  | 1.27 | 1.03 | 1.13  | 1.37  | 2.46  |
| 1.21 | 4.7   | 0.85 | 0.98 | 1.08 | 0.9   | 1.14 | 0.81 | 0.9   | 1.04  | 1.05  |
| 1.65 | 0.65  | 1.35 | 0.64 | 1.28 | 1.09  | 1.19 | 0.9  | 0.74  | 1.04  | 2.06  |
| 0.6  | 2.83  | 1.65 | 1.84 | 3.19 | 0.9   | 1.95 | 1.41 | 1.73  | 1.83  | 0.23  |
| 1.26 | 0.64  | 0.98 | 1.31 | 1.28 | 0.78  | 0.99 | 1.56 | 0.87  | 1.1   | 1.14  |
| 6.85 | 1.19  | 0.92 | 0.93 | 1.71 | 1.55  | 1.62 | 1.17 | 0.88  | 1.08  | 0.79  |
| 1.61 | 0.52  | 1.12 | 1.23 | 1.26 | 2.02  | 1.3  | 0.76 | 1.26  | 0.8   | 1.08  |
| 0.5  | 5.73  | 1.34 | 1.89 | 1.57 | 1.36  | 0.84 | 1.44 | 2.14  | 2.8   | 2.71  |
| 1.07 | 0.1   | 0.9  | 1.44 | 1.49 | 1.15  | 0.97 | 1.01 | 1.26  | 0.74  | 1.72  |
| 1.35 | 0.97  | 1.19 | 0.74 | 1.15 | 1.21  | 0.99 | 0.76 | 1.11  | 1.33  | 0.57  |
| 0.99 | 1.23  | 1.01 | 1.54 | 0.82 | 1.05  | 1.07 | 0.73 | 1.18  | 2     | 0.77  |
| 0.87 | 0.17  | 0.42 | 1.87 | 0.5  | 0.97  | 1.05 | 1.25 | 2     | 1     | 1.5   |
| 9.99 | 1.4   | 4.36 | 0.16 | 4.6  | 102.5 | 4.79 | 0.74 | 52.59 | 52.03 | 1.1   |
| 1.44 | 1.89  | 1.36 | 0.85 | 1.55 | 2.06  | 1.14 | 0.77 | 1.07  | 0.53  | 0.37  |
| 1.29 | 4.88  | 0.32 | 1    | 0.52 | 1.79  | 1.58 | 0.73 | 2.06  | 0.13  | 1.3   |
| 1.21 | 1.54  | 0.9  | 0.88 | 1.26 | 0.98  | 1.34 | 0.95 | 1.52  | 1.22  | 0.92  |
| 1.04 | 3.51  | 0.9  | 2.93 | 2.74 | 0.87  | 0.87 | 1.22 | 5.36  | 1.02  | 5.14  |
| 1.25 | 2.21  | 0.72 | 2.59 | 2.74 | 0.55  | 1.47 | 0.9  | 0.88  | 0.33  | 0.45  |
| 1.2  | 3.34  | 0.91 | 1.01 | 2.36 | 1.28  | 1.48 | 1.15 | 0.78  | 1.17  | 7.54  |
| 0.93 | 0.17  | 0.11 | 1.55 | 1.13 | 1.37  | 0.95 | 1.12 | 0.86  | 0.87  | 2.05  |
| 0.8  | 1.15  | 0.97 | 0.87 | 0.85 | 0.78  | 0.67 | 3.02 | 1.26  | 0.51  | 17.12 |
| 1.17 | 6.37  | 1.37 | 1.57 | 1.06 | 1.22  | 0.98 | 0.86 | 1.55  | 1.04  | 1.05  |
| 0.9  | 1.4   | 0.91 | 0.88 | 1.21 | 0.88  | 0.84 | 1.02 | 1.15  | 1.07  | 0.64  |
| 0.99 | 0.76  | 1.03 | 0.71 | 1.1  | 0.82  | 0.95 | 1.28 | 0.84  | 1.28  | 0.62  |
| 1    | 16.98 | 1.09 | 1.14 | 1.09 | 0.86  | 1.04 | 1    | 2.29  | 1.31  | 0.79  |
| 0.79 | 1.16  | 1.05 | 0.88 | 2.52 | 0.91  | 1.1  | 1.07 | 1.2   | 1.07  | 0.99  |
| 0.89 | 3.73  | 0.94 | 0.99 | 1.69 | 0.9   | 1.05 | 1.22 | 1.02  | 1.03  | 1.21  |
| 1.07 | 0.8   | 1.22 | 0.83 | 0.64 | 1.09  | 0.99 | 1.12 | 0.9   | 0.83  | 1     |
| 0.73 | 3.11  | 0.56 | 2.66 | 0.81 | 0.57  | 0.68 | 0.76 | 0.82  | 0.62  | 1.06  |
| 1.39 | 7.15  | 1.08 | 1.13 | 0.68 | 1.35  | 1.82 | 0.9  | 1.65  | 0.77  | 0.8   |

|      |       |      |      |      |      |      |      |      |      |      |
|------|-------|------|------|------|------|------|------|------|------|------|
| 1.31 | 2.09  | 0.94 | 1.65 | 0.92 | 0.9  | 0.95 | 1.08 | 0.8  | 2.26 | 1.03 |
| 0.83 | 1.57  | 0.86 | 0.77 | 0.92 | 0.77 | 0.84 | 0.95 | 0.63 | 0.92 | 0.86 |
| 0.75 | 0.99  | 1.42 | 3.92 | 0.75 | 0.68 | 0.84 | 1.08 | 0.99 | 1.59 | 1.53 |
| 4.71 | 1.9   | 0.96 | 0.67 | 1.91 | 0.69 | 1.57 | 1.29 | 1.11 | 0.6  | 0.69 |
| 1.72 | 10.09 | 1    | 1.8  | 1.07 | 0.95 | 1.26 | 1.21 | 0.73 | 1.17 | 1.07 |
| 0.5  | 1.58  | 0.73 | 0.47 | 0.54 | 0.67 | 0.28 | 0.71 | 0.6  | 0.62 | 0.54 |
| 1.47 | 1.53  | 1.13 | 0.87 | 1.55 | 1.45 | 0.98 | 0.78 | 1.16 | 1.52 | 1.08 |
| 0.94 | 0.89  | 1.12 | 1.24 | 0.93 | 1.44 | 1.29 | 0.82 | 1.26 | 0.71 | 1.14 |
| 0.57 | 3.25  | 0.75 | 1.11 | 3.6  | 1.03 | 1.19 | 1.03 | 1.23 | 1.65 | 0.84 |
| 1.01 | 0.81  | 1.33 | 0.73 | 4.06 | 1.22 | 1.08 | 0.91 | 1.19 | 1.39 | 1.14 |
| 0.91 | 0.76  | 1.43 | 1.69 | 1.03 | 0.84 | 0.88 | 1.03 | 1.2  | 0.65 | 0.9  |
| 1.14 | 1.78  | 1.05 | 1.02 | 1.28 | 1.11 | 0.96 | 1.22 | 0.91 | 1.26 | 1.13 |
| 0.73 | 0.9   | 0.79 | 1.14 | 1.35 | 0.95 | 1.08 | 1.68 | 0.91 | 1.03 | 1.33 |
| 0.87 | 1.26  | 1.16 | 1.09 | 0.7  | 0.78 | 0.79 | 1.17 | 0.98 | 0.84 | 2.9  |
| 1.26 | 1.08  | 1.08 | 1.05 | 0.71 | 1.04 | 0.71 | 0.83 | 1.11 | 2.56 | 0.9  |
| 1.24 | 1.14  | 1.14 | 0.94 | 1.2  | 1.06 | 1.12 | 0.98 | 3.63 | 1.01 | 0.79 |
| 0.92 | 1.14  | 1.26 | 1.03 | 1.54 | 1.03 | 1.07 | 1.06 | 0.56 | 1.32 | 0.93 |
| 1.19 | 1.27  | 0.91 | 1.38 | 1.44 | 1.02 | 1.3  | 1.2  | 1.29 | 1.75 | 1.77 |
| 1.2  | 7.4   | 1.14 | 0.76 | 1.51 | 0.83 | 1.32 | 0.95 | 1.48 | 0.97 | 0.56 |
| 0.7  | 3.83  | 0.7  | 1.41 | 1.1  | 0.77 | 1.21 | 0.98 | 0.96 | 0.81 | 2.22 |
| 0.98 | 0.92  | 0.7  | 0.76 | 0.88 | 1.1  | 1.16 | 1.59 | 1.34 | 0.85 | 1.33 |
| 0.71 | 1.58  | 1.09 | 1.41 | 3.3  | 1.08 | 0.91 | 0.92 | 1.03 | 1.09 | 1.06 |
| 1.1  | 0.92  | 1.03 | 1.05 | 1.07 | 0.98 | 1.15 | 1.05 | 0.76 | 1.21 | 1.01 |
| 1.86 | 1.24  | 1.63 | 0.96 | 0.61 | 1.65 | 1.1  | 0.86 | 0.67 | 1.73 | 0.35 |
| 0.88 | 1.7   | 1.31 | 0.35 | 1.2  | 0.5  | 1.02 | 0.98 | 1.2  | 0.87 | 0.59 |
| 1.08 | 2.36  | 1.21 | 0.93 | 1.14 | 1.08 | 1.26 | 0.78 | 1.39 | 1.76 | 1.27 |
| 1.29 | 0.15  | 1.03 | 0.68 | 1.22 | 1.3  | 1.13 | 0.95 | 0.99 | 1.23 | 1.08 |
| 1.33 | 1.93  | 1.32 | 0.64 | 2.46 | 1.58 | 1.03 | 0.61 | 0.87 | 2.06 | 1.11 |
| 0.79 | 0.9   | 0.52 | 0.39 | 0.98 | 0.9  | 1.01 | 1.39 | 1.12 | 1.32 | 2.59 |
| 0.82 | 1.49  | 0.94 | 2.69 | 0.86 | 1.22 | 1.07 | 1.19 | 0.86 | 0.9  | 1.16 |
| 0.84 | 0.72  | 5.78 | 0.91 | 0.98 | 1.31 | 1.11 | 0.93 | 0.2  | 1.04 | 1.14 |
| 0.99 | 4.71  | 1.49 | 2.72 | 0.58 | 1.14 | 0.73 | 1.2  | 0.78 | 1.85 | 2.96 |
| 1.09 | 1.44  | 0.97 | 1.02 | 1.24 | 1.18 | 1.18 | 1.01 | 1.15 | 1.59 | 1.69 |

|      |       |      |      |      |      |      |      |      |      |      |
|------|-------|------|------|------|------|------|------|------|------|------|
| 0.89 | 4.25  | 1.58 | 1.48 | 1.38 | 1.22 | 1.08 | 1.02 | 1.32 | 1.3  | 0.95 |
| 0.82 | 0.98  | 0.93 | 1.04 | 1.66 | 1.2  | 1.32 | 1.04 | 1.01 | 1.04 | 0.7  |
| 1.09 | 1.58  | 1.09 | 0.51 | 0.94 | 0.85 | 0.96 | 0.74 | 1.25 | 1.12 | 0.64 |
| 0.91 | 1.52  | 1.28 | 2.18 | 1.55 | 0.87 | 1.19 | 0.95 | 8.57 | 1.08 | 0.6  |
| 0.98 | 1.25  | 1.35 | 1.04 | 1.06 | 0.96 | 1.06 | 0.78 | 0.94 | 0.97 | 0.76 |
| 0.9  | 2     | 0.75 | 1.08 | 0.98 | 0.99 | 0.9  | 1.12 | 1.05 | 1.1  | 0.9  |
| 1    | 0.98  | 0.89 | 0.51 | 0.86 | 1.09 | 1    | 1    | 0.94 | 1.19 | 0.79 |
| 0.92 | 4.47  | 0.98 | 0.79 | 0.88 | 0.89 | 0.92 | 0.81 | 1.18 | 0.84 | 0.82 |
| 1.23 | 1.46  | 1.3  | 0.5  | 0.63 | 1.23 | 0.74 | 0.99 | 0.62 | 0.65 | 0.6  |
| 1.06 | 21.73 | 1.24 | 1.26 | 0.61 | 1.08 | 1.85 | 1.05 | 1.05 | 0.84 | 1.41 |
| 1.14 | 1.07  | 0.96 | 1.94 | 0.84 | 0.93 | 0.6  | 1.01 | 0.59 | 1.09 | 0.63 |
| 1.06 | 2.07  | 1.17 | 3.43 | 1.25 | 1.54 | 0.89 | 0.99 | 1.09 | 1.15 | 1.12 |
| 1.07 | 1.59  | 0.88 | 1.53 | 1.38 | 1.02 | 1.35 | 1.21 | 1.15 | 1.6  | 1.74 |
| 1.09 | 3.68  | 0.88 | 2.59 | 0.96 | 0.85 | 0.74 | 0.62 | 1.08 | 0.93 | 0.45 |
| 1.38 | 3.14  | 0.29 | 0.97 | 2.04 | 1.67 | 1.45 | 0.81 | 2.65 | 0.41 | 0.51 |
| 1.1  | 0.84  | 1.01 | 0.85 | 0.95 | 0.93 | 1.17 | 1.13 | 0.28 | 0.87 | 1.02 |
| 0.91 | 1.23  | 0.95 | 0.63 | 1.22 | 1.11 | 0.9  | 0.94 | 0.84 | 0.92 | 1.83 |
| 0.9  | 0.48  | 1.12 | 1.03 | 1.13 | 0.87 | 1.03 | 1.82 | 2.47 | 2.9  | 0.62 |
| 0.96 | 0.89  | 3.3  | 1.47 | 0.81 | 0.88 | 1.1  | 1.04 | 0.87 | 1.03 | 0.96 |
| 0.84 | 1.04  | 1.5  | 0.9  | 1.09 | 0.92 | 1.01 | 0.91 | 1.02 | 0.77 | 0.79 |
| 1.04 | 0.75  | 1.02 | 0.92 | 0.82 | 1.38 | 1.18 | 0.78 | 1.15 | 0.49 | 0.85 |
| 1.21 | 1.19  | 1.41 | 1.1  | 1.26 | 0.98 | 1.26 | 1.16 | 1.23 | 0.46 | 1.34 |
| 1.06 | 1.48  | 1.13 | 1.31 | 6.22 | 1.32 | 1.16 | 0.91 | 3.56 | 0.85 | 1.18 |
| 0.94 | 0.72  | 1.01 | 2.15 | 0.91 | 0.76 | 0.64 | 0.63 | 1.37 | 0.68 | 0.77 |
| 1.38 | 0.64  | 1    | 0.98 | 1.34 | 1    | 0.89 | 1.19 | 1.32 | 0.94 | 0.46 |
| 1.15 | 2.14  | 1.09 | 0.96 | 0.6  | 0.85 | 0.77 | 1.06 | 0.82 | 0.89 | 0.58 |
| 1.29 | 2.35  | 1.31 | 0.74 | 1    | 0.94 | 1.03 | 1.15 | 0.83 | 0.88 | 1.11 |
| 0.82 | 1.21  | 0.9  | 2.39 | 1.03 | 0.76 | 0.92 | 1.25 | 1.13 | 1.4  | 0.66 |
| 1.07 | 0.95  | 1.01 | 0.58 | 1.04 | 1.19 | 1.06 | 0.83 | 1.2  | 0.67 | 1.09 |
| 1.19 | 3     | 0.83 | 0.77 | 0.8  | 0.86 | 1.02 | 0.81 | 0.83 | 0.93 | 0.76 |
| 0.81 | 3.78  | 1.24 | 1.41 | 4.74 | 1    | 0.8  | 1.19 | 2.19 | 0.72 | 1.27 |
| 1.01 | 0.99  | 0.95 | 1.01 | 1.15 | 1.03 | 1.09 | 1.07 | 1.03 | 1.01 | 1.18 |
| 1.1  | 2.66  | 1.06 | 1.47 | 0.7  | 1.04 | 0.95 | 1.07 | 3.17 | 0.94 | 0.98 |

|      |       |      |       |      |      |      |      |      |      |      |
|------|-------|------|-------|------|------|------|------|------|------|------|
| 6.69 | 0.88  | 0.81 | 0.33  | 1.06 | 1.33 | 1.5  | 1.58 | 1.31 | 0.81 | 1.03 |
| 0.82 | 1.81  | 1.22 | 0.87  | 4.74 | 0.91 | 0.92 | 1.31 | 1.12 | 0.89 | 1.22 |
| 1.01 | 0.89  | 0.97 | 1.04  | 1.01 | 0.88 | 1.08 | 1.09 | 1.04 | 0.96 | 1.31 |
| 1.19 | 1.97  | 3.63 | 0.88  | 1.27 | 1.49 | 1.27 | 0.74 | 0.5  | 0.77 | 1.12 |
| 0.51 | 1.54  | 0.93 | 14.76 | 0.34 | 0.89 | 1.34 | 2.1  | 0.75 | 0.68 | 6.09 |
| 0.99 | 2.25  | 1.62 | 0.96  | 1.15 | 1    | 0.97 | 1.29 | 0.95 | 0.92 | 1.02 |
| 0.7  | 5.46  | 0.54 | 0.88  | 1.09 | 0.51 | 0.74 | 1.17 | 4.07 | 1.4  | 0.77 |
| 0.93 | 1.03  | 0.9  | 0.84  | 0.79 | 1.24 | 0.53 | 0.96 | 0.77 | 2.13 | 1    |
| 0.94 | 4.35  | 0.91 | 1.26  | 2.65 | 1.02 | 1.02 | 1.13 | 1.62 | 0.71 | 2.52 |
| 0.68 | 1.28  | 0.61 | 0.86  | 3.62 | 0.5  | 0.79 | 1.22 | 2.85 | 1.63 | 0.75 |
| 0.73 | 0.99  | 1.3  | 0.62  | 1.63 | 0.67 | 1.18 | 0.78 | 0.93 | 0.9  | 2.9  |
| 0.83 | 0.85  | 1.82 | 4.19  | 0.88 | 0.62 | 0.99 | 1.11 | 1.27 | 0.93 | 1.6  |
| 0.92 | 0.48  | 0.81 | 0.82  | 1.26 | 1.14 | 0.88 | 0.93 | 0.85 | 0.98 | 1.35 |
| 0.91 | 2.75  | 0.95 | 3.18  | 0.77 | 1.01 | 1.05 | 0.98 | 4.53 | 0.92 | 0.83 |
| 0.92 | 1.88  | 1.4  | 4.41  | 1.33 | 0.86 | 1.19 | 1    | 3.14 | 0.97 | 0.6  |
| 1.06 | 1.44  | 1.39 | 0.89  | 1.06 | 1.07 | 0.95 | 1.14 | 1.18 | 1.52 | 0.77 |
| 1.19 | 3.02  | 0.91 | 1.44  | 1.42 | 0.88 | 0.99 | 1.44 | 5    | 0.86 | 1.46 |
| 0.78 | 0.87  | 0.97 | 1.1   | 0.89 | 0.87 | 0.98 | 0.98 | 1.01 | 0.97 | 0.84 |
| 1.21 | 2.61  | 0.69 | 2.7   | 1.14 | 1.48 | 0.86 | 0.7  | 1.38 | 1.24 | 1.38 |
| 1.12 | 0.69  | 0.88 | 9.21  | 1.48 | 1.32 | 1.29 | 0.92 | 1.48 | 0.99 | 2.78 |
| 1    | 1.3   | 0.53 | 1.4   | 1.07 | 0.95 | 0.94 | 0.97 | 0.9  | 1.01 | 0.68 |
| 0.57 | 0.62  | 0.72 | 0.85  | 0.58 | 0.72 | 0.29 | 1.26 | 0.94 | 1.33 | 0.31 |
| 0.96 | 1.21  | 0.89 | 1.48  | 0.92 | 1.02 | 1.11 | 1.17 | 1.3  | 1.34 | 0.8  |
| 3.2  | 0.51  | 0.87 | 0.27  | 1.34 | 1.06 | 1.35 | 1.09 | 1.58 | 0.89 | 0.85 |
| 1.13 | 0.92  | 1.03 | 0.73  | 1.26 | 1    | 1.13 | 0.89 | 1.04 | 1.27 | 0.75 |
| 1.07 | 26.67 | 2.78 | 1.28  | 2.13 | 0.24 | 1.88 | 0.59 | 0.84 | 0.27 | 6.67 |
| 0.87 | 0.83  | 1.17 | 1.64  | 1.28 | 1.13 | 1.18 | 1.23 | 1.39 | 0.84 | 1.29 |
| 0.95 | 1.15  | 1.11 | 0.69  | 2.97 | 0.93 | 1.21 | 1.01 | 2.72 | 0.93 | 0.95 |
| 1.12 | 6.75  | 0.95 | 1.32  | 3.81 | 0.97 | 0.96 | 1.13 | 3.84 | 0.93 | 1.05 |
| 0.84 | 0.94  | 1.06 | 0.65  | 1.22 | 1.11 | 0.96 | 0.96 | 0.97 | 0.86 | 0.85 |
| 1.16 | 7.19  | 0.84 | 1.21  | 0.65 | 0.62 | 0.78 | 1.06 | 1.14 | 1.49 | 1.17 |
| 0.84 | 2     | 0.89 | 1.27  | 0.89 | 0.89 | 1.06 | 0.83 | 0.9  | 0.88 | 1.12 |
| 1    | 0.83  | 0.86 | 1.17  | 1.05 | 0.93 | 1.18 | 1.02 | 0.66 | 0.75 | 1.78 |



|      |      |      |      |      |      |      |      |      |       |      |
|------|------|------|------|------|------|------|------|------|-------|------|
| 1.18 | 1.19 | 0.83 | 1.48 | 0.92 | 1.02 | 1.1  | 0.92 | 0.95 | 0.74  | 0.8  |
| 0.94 | 0.33 | 1.12 | 0.83 | 1.18 | 1.02 | 1.02 | 0.91 | 1.44 | 1.34  | 1.19 |
| 0.83 | 0.48 | 1.06 | 1.02 | 0.82 | 0.57 | 1.21 | 1.16 | 0.79 | 0.78  | 1.57 |
| 0.62 | 0.55 | 0.66 | 0.83 | 0.65 | 0.82 | 0.87 | 1.08 | 0.74 | 0.87  | 0.97 |
| 0.93 | 2.78 | 0.85 | 0.94 | 0.65 | 0.77 | 0.82 | 1.63 | 2.21 | 0.93  | 0.74 |
| 0.94 | 4.25 | 0.64 | 0.94 | 0.71 | 0.99 | 1.23 | 0.82 | 1.08 | 0.95  | 1.09 |
| 0.99 | 0.28 | 0.83 | 0.48 | 1.04 | 1.36 | 1.16 | 0.9  | 0.78 | 0.8   | 1.69 |
| 0.8  | 2.23 | 1.13 | 1.31 | 1.98 | 0.89 | 1.13 | 0.94 | 0.29 | 0.78  | 1.07 |
| 3.39 | 1.19 | 0.99 | 0.4  | 1.04 | 1.27 | 1.09 | 1.42 | 0.79 | 0.83  | 0.78 |
| 0.94 | 1.83 | 0.98 | 0.82 | 1.13 | 1.29 | 1.32 | 0.88 | 1.4  | 0.41  | 0.89 |
| 0.77 | 0.93 | 1.26 | 0.61 | 0.97 | 0.94 | 0.9  | 0.9  | 1.33 | 1.1   | 0.76 |
| 0.83 | 0.5  | 0.82 | 2.5  | 1.15 | 1.13 | 0.98 | 1.09 | 0.62 | 0.89  | 0.64 |
| 0.76 | 1.04 | 1    | 1.47 | 1.17 | 0.58 | 1.14 | 0.93 | 0.8  | 1.17  | 1.27 |
| 0.96 | 0.66 | 4.58 | 0.71 | 1.33 | 1.44 | 1.06 | 1.08 | 0.17 | 0.75  | 1.22 |
| 0.91 | 1.85 | 1.06 | 1.55 | 0.89 | 0.89 | 0.94 | 0.76 | 0.92 | 0.81  | 0.8  |
| 0.67 | 3.31 | 0.81 | 1    | 0.83 | 0.77 | 1.03 | 1.07 | 1.01 | 0.44  | 0.43 |
| 0.74 | 1.48 | 0.6  | 0.99 | 0.78 | 0.97 | 1    | 0.91 | 0.82 | 0.98  | 1.04 |
| 0.84 | 0.62 | 1.14 | 0.77 | 1.17 | 0.92 | 1.15 | 0.87 | 9.36 | 0.68  | 0.82 |
| 2.21 | 0.61 | 1.4  | 2.18 | 0.66 | 0.57 | 1.28 | 1.35 | 1.3  | 42.28 | 0.36 |
| 0.76 | 2.04 | 1.14 | 1.55 | 0.44 | 0.39 | 0.75 | 1.21 | 0.5  | 0.35  | 1.81 |
| 1.33 | 1.5  | 0.75 | 0.6  | 0.9  | 0.94 | 0.94 | 0.92 | 0.9  | 1.71  | 0.91 |
| 0.68 | 3.48 | 0.6  | 0.88 | 3.42 | 0.54 | 0.77 | 1.24 | 4.58 | 1.49  | 0.85 |
| 0.93 | 0.18 | 1.07 | 0.96 | 0.47 | 0.87 | 0.7  | 1.28 | 0.99 | 1.32  | 7.21 |
| 0.84 | 1.16 | 0.59 | 0.49 | 0.36 | 0.93 | 1.92 | 0.9  | 1.11 | 1.93  | 3.1  |
| 1.24 | 1.94 | 0.89 | 1.11 | 1.14 | 1.01 | 1.15 | 1.03 | 0.99 | 0.8   | 0.84 |
| 1.33 | 3.48 | 1.11 | 1.05 | 0.95 | 0.81 | 0.85 | 1.05 | 1.39 | 0.72  | 0.8  |
| 0.82 | 0.87 | 1.19 | 1.09 | 0.98 | 1.53 | 0.61 | 1.16 | 0.63 | 1.1   | 2.34 |
| 1.14 | 3.1  | 1.19 | 0.95 | 0.96 | 1.08 | 1.1  | 0.78 | 1.14 | 0.68  | 1.54 |
| 0.75 | 1.03 | 0.61 | 0.8  | 0.72 | 1.05 | 1.36 | 1.6  | 1.73 | 0.72  | 0.76 |
| 1.99 | 0.27 | 0.5  | 0.62 | 1.78 | 0.99 | 0.9  | 0.32 | 3.36 | 0.27  | 1.79 |
| 1.27 | 0.69 | 1.41 | 1.16 | 1.85 | 1.02 | 0.7  | 0.98 | 2.14 | 0.64  | 1.64 |
| 0.94 | 1.06 | 0.98 | 1.04 | 2.11 | 4.2  | 0.8  | 0.81 | 2.41 | 0.11  | 1.76 |
| 1.4  | 2.52 | 0.64 | 2.13 | 0.45 | 0.62 | 1.27 | 2.48 | 1.58 | 1.44  | 0.76 |

|      |      |      |      |      |       |      |      |      |       |       |
|------|------|------|------|------|-------|------|------|------|-------|-------|
| 1.07 | 1.09 | 0.91 | 1.14 | 1.03 | 0.72  | 0.78 | 0.76 | 0.88 | 0.86  | 1.11  |
| 1.06 | 0.81 | 0.66 | 1.66 | 1.07 | 0.77  | 0.99 | 0.89 | 0.55 | 1.17  | 0.97  |
| 2.45 | 2.3  | 5.4  | 2.32 | 1.17 | 9.51  | 2.45 | 1.01 | 8.79 | 1.02  | 11.74 |
| 0.59 | 4.54 | 0.71 | 0.81 | 0.85 | 0.9   | 1.15 | 1.19 | 0.7  | 0.45  | 0.56  |
| 0.73 | 3.14 | 0.52 | 1.09 | 1.26 | 0.97  | 1.07 | 0.96 | 1.01 | 0.82  | 0.71  |
| 1.28 | 1.12 | 1.08 | 1.2  | 0.89 | 0.73  | 1.32 | 1.08 | 0.73 | 1.32  | 1.01  |
| 1.25 | 3.31 | 0.94 | 0.81 | 1.3  | 1.2   | 0.9  | 1.1  | 0.91 | 0.89  | 1.86  |
| 1.07 | 0.44 | 1.01 | 2.12 | 1.13 | 0.98  | 0.84 | 1.12 | 1.04 | 1.09  | 0.93  |
| 1.24 | 2.89 | 0.94 | 1.3  | 2.04 | 1.04  | 1.16 | 1.05 | 1.06 | 0.78  | 0.97  |
| 1.08 | 0.23 | 1.2  | 0.98 | 1.1  | 1.75  | 1.6  | 0.85 | 1.45 | 0.57  | 0.98  |
| 1.25 | 0.64 | 1.26 | 1.05 | 0.84 | 1.04  | 1.1  | 0.89 | 0.98 | 0.87  | 1.31  |
| 1.69 | 0.08 | 6.6  | 0.23 | 0.4  | 27.04 | 3.35 | 0.76 | 0.28 | 14.57 | 15.54 |
| 1.35 | 1.83 | 1.01 | 1.82 | 0.9  | 1.09  | 1.13 | 1.21 | 1.07 | 0.89  | 1.3   |
| 1.16 | 0.33 | 0.52 | 1.1  | 1.56 | 0.72  | 1.34 | 0.87 | 1.02 | 0.76  | 1.48  |

| 204346_s_at | 209341_s_at | 201502_s_at | 209341_s_at | 202431_s_at | 203132_at | 207163_s_at | 205407_at | 202431_s_at | 205932_s_at | 200639_s_at |
|-------------|-------------|-------------|-------------|-------------|-----------|-------------|-----------|-------------|-------------|-------------|
| 1.13        | 1.02        | 1.09        | 1.02        | 1.04        | 0.96      | 1.01        | 8.89      | 1.04        | 1.23        | 1           |
| 0.86        | 1.16        | 2.23        | 1.16        | 0.41        | 1.21      | 1.01        | 0.98      | 0.41        | 1.14        | 1.16        |
| 0.82        | 1.85        | 0.67        | 1.85        | 1.13        | 3.28      | 0.99        | 0.47      | 1.13        | 0.6         | 0.84        |
| 1.58        | 1.14        | 1.11        | 1.14        | 1.17        | 0.88      | 1.02        | 9.11      | 1.17        | 1.2         | 0.93        |
| 1.08        | 1.51        | 2.56        | 1.51        | 1.22        | 1         | 1           | 0.72      | 1.22        | 1.09        | 1.17        |
| 1.01        | 0.71        | 0.98        | 0.71        | 735.49      | 0.82      | 1.33        | 2.54      | 735.49      | 5.53        | 1           |
| 1.03        | 1.34        | 1.29        | 1.34        | 0.85        | 1.21      | 1.22        | 3.48      | 0.85        | 1.34        | 0.83        |
| 0.95        | 0.95        | 1.6         | 0.95        | 1.08        | 0.93      | 0.82        | 0.6       | 1.08        | 1.01        | 0.89        |
| 1.07        | 1           | 1.32        | 1           | 0.82        | 1.04      | 0.97        | 1.1       | 0.82        | 1.51        | 0.95        |
| 4.08        | 0.75        | 2.58        | 0.75        | 1.95        | 0.53      | 1.02        | 0.58      | 1.95        | 3.52        | 1.13        |
| 0.84        | 1.27        | 1.16        | 1.27        | 0.89        | 1.11      | 1.12        | 1.63      | 0.89        | 1.03        | 0.88        |
| 1.06        | 1.1         | 0.58        | 1.1         | 0.97        | 1         | 1.04        | 0.98      | 0.97        | 0.85        | 0.99        |
| 1.29        | 1.16        | 0.85        | 1.16        | 1.03        | 1.03      | 1.42        | 0.52      | 1.03        | 1.09        | 1.16        |
| 0.49        | 0.26        | 0.43        | 0.26        | 0.15        | 0.1       | 0.16        | 0.44      | 0.15        | 0.01        | 0.54        |
| 1.07        | 1.47        | 1.02        | 1.47        | 1.71        | 1.06      | 1.59        | 1.48      | 1.71        | 1.54        | 1.13        |
| 1.36        | 1.21        | 1.15        | 1.21        | 0.92        | 0.87      | 1.08        | 1.13      | 0.92        | 1.51        | 0.94        |
| 1.13        | 1.25        | 0.7         | 1.25        | 0.83        | 1.16      | 1.29        | 1.03      | 0.83        | 1.24        | 1.14        |
| 0.86        | 1.05        | 2.03        | 1.05        | 0.74        | 0.91      | 0.95        | 0.93      | 0.74        | 6           | 1.12        |
| 1.11        | 1.32        | 1.4         | 1.32        | 0.22        | 0.67      | 1.32        | 1.35      | 0.22        | 0.7         | 0.89        |
| 0.78        | 1.39        | 0.54        | 1.39        | 0.74        | 1.69      | 0.85        | 10.58     | 0.74        | 0.64        | 1.01        |
| 2.35        | 0.49        | 1.22        | 0.49        | 0.49        | 0.39      | 0.8         | 1.6       | 0.49        | 6.53        | 1.01        |
| 1.03        | 0.93        | 3.45        | 0.93        | 0.88        | 0.46      | 2.29        | 0.82      | 0.88        | 0.95        | 0.82        |
| 0.62        | 1.07        | 1.18        | 1.07        | 1.41        | 0.76      | 0.83        | 1.17      | 1.41        | 1.28        | 0.96        |
| 1.1         | 1.21        | 0.35        | 1.21        | 0.75        | 0.83      | 1.69        | 4.89      | 0.75        | 0.71        | 0.9         |
| 2.39        | 1.79        | 2.23        | 1.79        | 6.79        | 0.54      | 0.83        | 0.09      | 6.79        | 0.14        | 1.43        |
| 0.79        | 0.85        | 0.78        | 0.85        | 0.76        | 0.44      | 1.05        | 1.54      | 0.76        | 0.92        | 0.74        |
| 0.79        | 1.14        | 0.42        | 1.14        | 0.76        | 0.7       | 1.09        | 1.03      | 0.76        | 0.82        | 1.16        |
| 0.81        | 0.97        | 4.18        | 0.97        | 1.03        | 0.53      | 3.35        | 0.74      | 1.03        | 0.84        | 1.78        |
| 0.48        | 0.5         | 0.54        | 0.5         | 3.43        | 6.56      | 1.92        | 0.84      | 3.43        | 2.74        | 0.75        |
| 1.18        | 0.83        | 1.47        | 0.83        | 3.16        | 0.85      | 0.85        | 0.79      | 3.16        | 1.19        | 0.92        |

|       |      |      |      |        |       |      |       |        |      |      |
|-------|------|------|------|--------|-------|------|-------|--------|------|------|
| 0.92  | 0.69 | 0.66 | 0.69 | 1.37   | 0.8   | 0.96 | 0.63  | 1.37   | 3.69 | 1.09 |
| 5.76  | 3.19 | 0.93 | 3.19 | 4.73   | 10.55 | 4.92 | 2.21  | 4.73   | 8.14 | 3.68 |
| 0.94  | 1.26 | 0.84 | 1.26 | 0.71   | 1.18  | 1.02 | 1.33  | 0.71   | 1.18 | 0.98 |
| 1.39  | 0.76 | 0.35 | 0.76 | 0.55   | 1.34  | 1.49 | 0.38  | 0.55   | 0.72 | 0.64 |
| 0.73  | 2.42 | 2.61 | 2.42 | 1.69   | 1.64  | 1.34 | 0.03  | 1.69   | 0.73 | 0.96 |
| 4.76  | 0.78 | 0.81 | 0.78 | 1.53   | 1.08  | 1.44 | 0.86  | 1.53   | 3.14 | 0.8  |
| 0.68  | 0.93 | 2.35 | 0.93 | 0.97   | 0.86  | 0.49 | 0.2   | 0.97   | 1.98 | 1.16 |
| 0.94  | 0.78 | 0.71 | 0.78 | 1.17   | 0.74  | 0.98 | 0.85  | 1.17   | 1.29 | 1.12 |
| 0.67  | 0.89 | 3.57 | 0.89 | 0.55   | 0.9   | 1.29 | 7.07  | 0.55   | 3.54 | 1.02 |
| 0.69  | 1.88 | 1.29 | 1.88 | 0.48   | 1.07  | 0.91 | 2.47  | 0.48   | 2.54 | 1.08 |
| 1.62  | 1.12 | 0.91 | 1.12 | 0.71   | 1.42  | 1.48 | 1.03  | 0.71   | 1.34 | 1.12 |
| 0.92  | 0.95 | 1.24 | 0.95 | 0.47   | 0.85  | 0.91 | 1.27  | 0.47   | 1    | 1.07 |
| 2.16  | 1.41 | 3.43 | 1.41 | 0.44   | 1.17  | 0.52 | 1.57  | 0.44   | 1.91 | 0.92 |
| 24.61 | 1.49 | 0.54 | 1.49 | 2.84   | 6.84  | 0.73 | 0.56  | 2.84   | 1.61 | 1.17 |
| 1.76  | 1.22 | 2.85 | 1.22 | 0.6    | 1.05  | 0.55 | 1.64  | 0.6    | 1.42 | 0.91 |
| 1.05  | 1.59 | 2.51 | 1.59 | 1.23   | 1.04  | 1.14 | 16.03 | 1.23   | 1.13 | 1.37 |
| 1.2   | 1.14 | 7.24 | 1.14 | 0.86   | 1     | 1.01 | 1.58  | 0.86   | 0.88 | 0.94 |
| 1.28  | 1.1  | 1.45 | 1.1  | 1.38   | 0.97  | 0.86 | 4.3   | 1.38   | 0.85 | 0.97 |
| 0.85  | 1.06 | 0.94 | 1.06 | 0.9    | 1.16  | 0.85 | 1.03  | 0.9    | 0.94 | 0.94 |
| 1.1   | 0.89 | 0.6  | 0.89 | 6.01   | 0.77  | 0.93 | 2.71  | 6.01   | 1.41 | 1.02 |
| 1.09  | 0.81 | 5.73 | 0.81 | 0.74   | 0.94  | 1.11 | 0.91  | 0.74   | 0.95 | 1.07 |
| 1.09  | 1.06 | 0.72 | 1.06 | 5.45   | 0.87  | 0.93 | Inf   | 5.45   | 0.78 | 0.83 |
| 0.73  | 0.7  | 0.85 | 0.7  | 1.2    | 1.08  | 0.82 | 1.8   | 1.2    | 0.55 | 0.99 |
| 1.25  | 1.13 | 1.21 | 1.13 | 0.64   | 1.03  | 1.46 | 0.95  | 0.64   | 2.01 | 1.19 |
| 1.05  | 0.66 | 1.24 | 0.66 | 1.96   | 0.93  | 0.69 | 0.11  | 1.96   | 2.46 | 1.06 |
| 1.75  | 1.16 | 1.54 | 1.16 | 0.62   | 1.02  | 1.46 | 0.56  | 0.62   | 1.35 | 0.55 |
| 1.13  | 1.15 | 6.08 | 1.15 | 0.59   | 0.38  | 1.56 | 0.66  | 0.59   | 4.78 | 0.76 |
| 0.77  | 2.16 | 1.78 | 2.16 | 0.5    | 1.38  | 0.82 | 0.83  | 0.5    | 0.59 | 0.56 |
| 0.68  | 1.43 | 4.1  | 1.43 | 0.82   | 0.97  | 1.07 | 0.91  | 0.82   | 1.21 | 1.02 |
| 1.58  | 1.22 | 4.97 | 1.22 | 0.46   | 1.21  | 0.31 | 2.19  | 0.46   | 2.16 | 0.82 |
| 1.55  | 0.92 | 2.33 | 0.92 | 0.67   | 0.66  | 1.72 | 1.05  | 0.67   | 3.18 | 1.22 |
| 1.47  | 1.61 | 0.6  | 1.61 | 1.04   | 0.87  | 0.84 | 1.71  | 1.04   | 0.63 | 0.88 |
| 0.98  | 1.02 | 1.04 | 1.02 | 142.34 | 0.78  | 0.89 | 1.12  | 142.34 | 2.35 | 0.89 |

|      |      |      |      |       |        |      |       |       |       |       |
|------|------|------|------|-------|--------|------|-------|-------|-------|-------|
| 0.95 | 1.04 | 0.81 | 1.04 | 0.91  | 1.06   | 0.89 | 1.38  | 0.91  | 0.65  | 1.35  |
| 1.22 | 0.99 | 1.08 | 0.99 | 1.85  | 1.2    | 1.3  | 0.77  | 1.85  | 7.72  | 1.05  |
| 0.89 | 1    | 1.68 | 1    | 1     | 1.19   | 0.92 | 1.43  | 1     | 1.49  | 1.13  |
| 1.03 | 0.88 | 1.41 | 0.88 | 1.37  | 6.21   | 0.88 | 7.15  | 1.37  | 1.17  | 1.05  |
| 0.95 | 1.21 | 0.94 | 1.21 | 1.04  | 1.17   | 0.96 | 0.98  | 1.04  | 0.66  | 0.84  |
| 1.56 | 1.65 | 1.07 | 1.65 | 1.04  | 1.15   | 1.1  | 0.37  | 1.04  | 1.13  | 0.83  |
| 3.03 | 0.6  | 0.34 | 0.6  | 1.83  | 0.89   | 1.57 | 3.12  | 1.83  | 1.07  | 1.04  |
| 1.26 | 1.26 | 1.55 | 1.26 | 1.1   | 0.79   | 3.02 | 1.32  | 1.1   | 0.65  | 0.95  |
| 1.43 | 6.85 | 1.33 | 6.85 | 1.08  | 0.81   | 0.95 | 7.64  | 1.08  | 1.18  | 0.96  |
| 0.89 | 1.61 | 1.05 | 1.61 | 0.8   | 2.58   | 0.77 | 7.76  | 0.8   | 1.09  | 1.12  |
| 7    | 0.5  | 0.71 | 0.5  | 2.8   | 0.65   | 2.08 | 9.94  | 2.8   | 2.29  | 1.1   |
| 1.06 | 1.07 | 1.14 | 1.07 | 0.74  | 1.05   | 0.83 | 0.91  | 0.74  | 1.24  | 1.06  |
| 1.04 | 1.35 | 1.14 | 1.35 | 1.33  | 0.88   | 1.08 | 0.74  | 1.33  | 1.32  | 1.05  |
| 1.48 | 0.99 | 2.69 | 0.99 | 2     | 1.22   | 0.71 | 1.15  | 2     | 0.98  | 1     |
| 0.9  | 0.87 | 0.93 | 0.87 | 1     | 1.06   | 0.94 | 1.43  | 1     | 0.74  | 0.91  |
| 4.65 | 9.99 | 2.52 | 9.99 | 52.03 | 148.25 | 5.01 | 24.89 | 52.03 | 8.98  | 36.43 |
| 0.71 | 1.44 | 2.22 | 1.44 | 0.53  | 1.06   | 1.21 | 4.65  | 0.53  | 1.02  | 1.11  |
| 0.86 | 1.29 | 0.98 | 1.29 | 0.13  | 1.71   | 0.67 | 0.79  | 0.13  | 1.73  | 1.25  |
| 1.33 | 1.21 | 0.74 | 1.21 | 1.22  | 1.4    | 1.02 | 1.24  | 1.22  | 0.9   | 1.32  |
| 1.4  | 1.04 | 1.34 | 1.04 | 1.02  | 1.03   | 2.39 | 4.47  | 1.02  | 6.68  | 0.91  |
| 1.18 | 1.25 | 1.62 | 1.25 | 0.33  | 1.5    | 1.39 | 1.56  | 0.33  | 10.51 | 1.45  |
| 1.42 | 1.2  | 1.35 | 1.2  | 1.17  | 0.97   | 1.17 | 1.04  | 1.17  | 1.73  | 1.11  |
| 1.22 | 0.93 | 1.12 | 0.93 | 0.87  | 0.97   | 1.09 | 2.42  | 0.87  | 0.98  | 1.08  |
| 2.02 | 0.8  | 0.94 | 0.8  | 0.51  | 1.89   | 4.81 | 0.43  | 0.51  | 2.26  | 1.06  |
| 1.08 | 1.17 | 0.79 | 1.17 | 1.04  | 1.07   | 1.28 | 1.56  | 1.04  | 0.78  | 1.05  |
| 0.79 | 0.9  | 1.55 | 0.9  | 1.07  | 0.89   | 0.8  | 1.01  | 1.07  | 1.09  | 0.99  |
| 1.13 | 0.99 | 1.22 | 0.99 | 1.28  | 0.53   | 1.05 | 0.73  | 1.28  | 1.08  | 0.84  |
| 0.99 | 1    | 0.93 | 1    | 1.31  | 1.06   | 0.94 | 0.81  | 1.31  | 1.73  | 0.97  |
| 1.23 | 0.79 | 0.99 | 0.79 | 1.07  | 1.07   | 0.87 | 0.91  | 1.07  | 1.13  | 1.08  |
| 1.15 | 0.89 | 1.32 | 0.89 | 1.03  | 0.81   | 0.99 | 0.97  | 1.03  | 0.95  | 0.96  |
| 1.63 | 1.07 | 1.48 | 1.07 | 0.83  | 0.88   | 1.3  | 0.69  | 0.83  | 1.18  | 0.97  |
| 1.38 | 0.73 | 0.41 | 0.73 | 0.62  | 1.37   | 1.59 | 0.42  | 0.62  | 1.31  | 1.14  |
| 1.12 | 1.39 | 2.25 | 1.39 | 0.77  | 1.47   | 0.79 | 0.88  | 0.77  | 0.99  | 1.15  |

|      |      |      |      |      |      |      |      |      |      |      |
|------|------|------|------|------|------|------|------|------|------|------|
| 1.64 | 1.31 | 0.75 | 1.31 | 2.26 | 0.92 | 0.87 | 2.43 | 2.26 | 1.6  | 1.08 |
| 1.04 | 0.83 | 1    | 0.83 | 0.92 | 0.82 | 0.87 | 0.49 | 0.92 | 0.85 | 1.05 |
| 1.93 | 0.75 | 1.15 | 0.75 | 1.59 | 0.75 | 1.44 | 1.62 | 1.59 | 1.23 | 0.58 |
| 0.83 | 4.71 | 1.18 | 4.71 | 0.6  | 1.32 | 1    | 5.38 | 0.6  | 0.52 | 0.83 |
| 1.34 | 1.72 | 0.85 | 1.72 | 1.17 | 1.15 | 0.85 | 0.66 | 1.17 | 1.05 | 1.56 |
| 0.55 | 0.5  | 3.58 | 0.5  | 0.62 | 0.26 | 1.01 | 1.02 | 0.62 | 0.71 | 1.07 |
| 1.88 | 1.47 | 1.89 | 1.47 | 1.52 | 0.94 | 0.96 | 0.54 | 1.52 | 1.64 | 0.97 |
| 0.83 | 0.94 | 1.02 | 0.94 | 0.71 | 1.8  | 1.02 | 1.38 | 0.71 | 1.15 | 1.07 |
| 1.01 | 0.57 | 0.64 | 0.57 | 1.65 | 0.94 | 0.91 | 2.83 | 1.65 | 1.83 | 0.99 |
| 0.9  | 1.01 | 1.71 | 1.01 | 1.39 | 0.81 | 1.07 | 0.7  | 1.39 | 1.24 | 1.3  |
| 1.11 | 0.91 | 0.88 | 0.91 | 0.65 | 1.01 | 1.25 | 0.82 | 0.65 | 1.22 | 1.03 |
| 0.85 | 1.14 | 0.89 | 1.14 | 1.26 | 0.97 | 1.18 | 2.26 | 1.26 | 0.94 | 0.95 |
| 0.95 | 0.73 | 1.41 | 0.73 | 1.03 | 1.22 | 0.94 | 0.81 | 1.03 | 1.46 | 1.17 |
| 1.44 | 0.87 | 0.68 | 0.87 | 0.84 | 1.25 | 1.26 | 0.54 | 0.84 | 0.78 | 0.81 |
| 0.96 | 1.26 | 1.04 | 1.26 | 2.56 | 1.37 | 0.9  | 1.19 | 2.56 | 1.26 | 1.28 |
| 1.19 | 1.24 | 1.31 | 1.24 | 1.01 | 1.31 | 1.02 | 1.22 | 1.01 | 3.23 | 1    |
| 0.42 | 0.92 | 0.83 | 0.92 | 1.32 | 0.93 | 0.99 | 1.05 | 1.32 | 0.8  | 0.99 |
| 1.3  | 1.19 | 2.39 | 1.19 | 1.75 | 5.6  | 0.98 | 4.76 | 1.75 | 1.25 | 1.09 |
| 0.82 | 1.2  | 4.17 | 1.2  | 0.97 | 0.82 | 1.01 | 0.71 | 0.97 | 0.97 | 0.86 |
| 3.84 | 0.7  | 0.66 | 0.7  | 0.81 | 1.3  | 0.88 | 2.39 | 0.81 | 1.08 | 1.03 |
| 0.68 | 0.98 | 0.73 | 0.98 | 0.85 | 1.49 | 0.96 | 1.46 | 0.85 | 1.68 | 1.07 |
| 1.36 | 0.71 | 1    | 0.71 | 1.09 | 1.12 | 0.86 | 0.75 | 1.09 | 1.28 | 0.94 |
| 1    | 1.1  | 1.05 | 1.1  | 1.21 | 1.02 | 1.4  | 0.42 | 1.21 | 0.92 | 0.97 |
| 1.07 | 1.86 | 0.52 | 1.86 | 1.73 | 0.79 | 0.85 | 0.29 | 1.73 | 0.58 | 0.85 |
| 1.06 | 0.88 | 0.48 | 0.88 | 0.87 | 0.87 | 0.98 | 0.75 | 0.87 | 0.8  | 1.23 |
| 1.08 | 1.08 | 0.88 | 1.08 | 1.76 | 1.34 | 0.86 | 0.96 | 1.76 | 0.87 | 1.19 |
| 0.71 | 1.29 | 1.14 | 1.29 | 1.23 | 1.17 | 1.14 | 2.57 | 1.23 | 0.82 | 0.93 |
| 1.24 | 1.33 | 1.19 | 1.33 | 2.06 | 0.9  | 1.12 | 1.98 | 2.06 | 1.23 | 0.67 |
| 1.83 | 0.79 | 0.58 | 0.79 | 1.32 | 0.77 | 1.29 | 0.72 | 1.32 | 1.42 | 0.87 |
| 0.89 | 0.82 | 0.98 | 0.82 | 0.9  | 1.04 | 0.91 | 0.92 | 0.9  | 1.2  | 1.01 |
| 1.16 | 0.84 | 1.24 | 0.84 | 1.04 | 2.17 | 1.04 | 0.61 | 1.04 | 4.24 | 1.05 |
| 1.22 | 0.99 | 1.08 | 0.99 | 1.85 | 1.2  | 1.3  | 0.77 | 1.85 | 7.72 | 1.05 |
| 1.11 | 1.09 | 3.55 | 1.09 | 1.59 | 1.09 | 0.93 | 2.24 | 1.59 | 1.12 | 0.89 |

|      |      |      |      |      |      |      |      |      |      |      |
|------|------|------|------|------|------|------|------|------|------|------|
| 0.96 | 0.89 | 0.72 | 0.89 | 1.3  | 1.12 | 1.15 | 1.1  | 1.3  | 1.58 | 1.09 |
| 0.71 | 0.82 | 1.75 | 0.82 | 1.04 | 1.05 | 0.8  | 6.08 | 1.04 | 0.99 | 0.77 |
| 0.84 | 1.09 | 0.78 | 1.09 | 1.12 | 1.15 | 1.03 | 2.45 | 1.12 | 1.73 | 0.72 |
| 0.92 | 0.91 | 3    | 0.91 | 1.08 | 0.97 | 0.87 | 0.97 | 1.08 | 1.04 | 1.1  |
| 0.97 | 0.98 | 0.53 | 0.98 | 0.97 | 0.9  | 0.82 | 0.87 | 0.97 | 0.67 | 0.92 |
| 1.03 | 0.9  | 0.93 | 0.9  | 1.1  | 1.18 | 1.13 | 0.89 | 1.1  | 0.98 | 0.87 |
| 0.82 | 1    | 0.96 | 1    | 1.19 | 1.08 | 0.96 | 0.89 | 1.19 | 1.02 | 0.85 |
| 0.78 | 0.92 | 0.67 | 0.92 | 0.84 | 1.77 | 0.87 | 1.33 | 0.84 | 0.83 | 1.24 |
| 0.7  | 1.23 | 1.02 | 1.23 | 0.65 | 1.05 | 0.92 | 0.73 | 0.65 | 0.98 | 0.84 |
| 0.78 | 1.06 | 1.89 | 1.06 | 0.84 | 1.35 | 0.79 | 1    | 0.84 | 0.84 | 1.38 |
| 0.68 | 1.14 | 1.21 | 1.14 | 1.09 | 0.95 | 0.94 | 0.8  | 1.09 | 0.53 | 1.03 |
| 0.73 | 1.06 | 1.52 | 1.06 | 1.15 | 1.06 | 0.9  | 2.38 | 1.15 | 1.02 | 1.17 |
| 1.5  | 1.07 | 1.46 | 1.07 | 1.6  | 6.91 | 0.86 | 5.15 | 1.6  | 1.89 | 1.01 |
| 0.73 | 1.09 | 1.73 | 1.09 | 0.93 | 1.02 | 0.9  | 0.87 | 0.93 | 0.79 | 0.71 |
| 0.69 | 1.38 | 1.3  | 1.38 | 0.41 | 1.16 | 0.49 | 1.74 | 0.41 | 3.43 | 1.33 |
| 1.29 | 1.1  | 0.68 | 1.1  | 0.87 | 1.08 | 1.32 | 1.3  | 0.87 | 1.08 | 1.22 |
| 1.35 | 0.91 | 0.87 | 0.91 | 0.92 | 1.1  | 0.86 | 2.15 | 0.92 | 1.1  | 0.89 |
| 0.79 | 0.9  | 1.29 | 0.9  | 2.9  | 0.81 | 1.06 | 0.79 | 2.9  | 2.1  | 1.12 |
| 1.02 | 0.96 | 1.01 | 0.96 | 1.03 | 0.98 | 0.51 | 0.96 | 1.03 | 0.91 | 1.24 |
| 0.91 | 0.84 | 0.57 | 0.84 | 0.77 | 1.22 | 0.97 | 2.2  | 0.77 | 0.7  | 0.9  |
| 0.86 | 1.04 | 1.31 | 1.04 | 0.49 | 0.92 | 1.05 | 1.58 | 0.49 | 0.65 | 1.03 |
| 1.24 | 1.21 | 1.19 | 1.21 | 0.46 | 0.79 | 0.7  | Inf  | 0.46 | 2.18 | 1.38 |
| 1.02 | 1.06 | 0.86 | 1.06 | 0.85 | 0.95 | 1.31 | 1.16 | 0.85 | 6.42 | 1.02 |
| 1.06 | 0.94 | 0.69 | 0.94 | 0.68 | 1.08 | 0.8  | 0.95 | 0.68 | 0.99 | 0.76 |
| 0.85 | 1.38 | 1.04 | 1.38 | 0.94 | 1.23 | 0.98 | 0.97 | 0.94 | 1.09 | 1.14 |
| 1.17 | 1.15 | 1.19 | 1.15 | 0.89 | 1.41 | 0.94 | 0.66 | 0.89 | 0.9  | 0.61 |
| 0.7  | 1.29 | 3.06 | 1.29 | 0.88 | 1.11 | 1.52 | 0.69 | 0.88 | 0.94 | 1.15 |
| 1.27 | 0.82 | 0.94 | 0.82 | 1.4  | 0.89 | 0.89 | 3.08 | 1.4  | 1.16 | 1.09 |
| 0.95 | 1.07 | 0.81 | 1.07 | 0.67 | 1.05 | 0.9  | 0.96 | 0.67 | 1.12 | 0.94 |
| 0.78 | 1.19 | 2    | 1.19 | 0.93 | 0.92 | 0.79 | 1.05 | 0.93 | 0.85 | 1.06 |
| 0.8  | 0.81 | 0.78 | 0.81 | 0.72 | 1.07 | 1.05 | 0.91 | 0.72 | 9.13 | 0.98 |
| 1.26 | 1.01 | 1.66 | 1.01 | 1.01 | 1.04 | 0.92 | 0.86 | 1.01 | 1.2  | 1.05 |
| 1.06 | 1.1  | 1.06 | 1.1  | 0.94 | 1.06 | 1.09 | 1.06 | 0.94 | 1.12 | 1.05 |

|      |      |      |      |      |      |      |       |      |      |      |
|------|------|------|------|------|------|------|-------|------|------|------|
| 1.74 | 6.69 | 1.15 | 6.69 | 0.81 | 0.7  | 0.95 | 2.89  | 0.81 | 0.92 | 1.05 |
| 1.04 | 0.82 | 0.74 | 0.82 | 0.89 | 1.13 | 1.17 | 0.99  | 0.89 | 3.32 | 1.05 |
| 1.15 | 1.01 | 1.04 | 1.01 | 0.96 | 1.01 | 0.81 | 0.85  | 0.96 | 1.01 | 0.92 |
| 0.82 | 1.19 | 1.07 | 1.19 | 0.77 | 1.76 | 0.69 | 1.04  | 0.77 | 0.67 | 1.48 |
| 0.86 | 0.51 | 1.3  | 0.51 | 0.68 | 1.11 | 0.62 | 1.69  | 0.68 | 1.11 | 0.89 |
| 1.01 | 0.99 | 1.19 | 0.99 | 0.92 | 1.1  | 1.08 | 0.82  | 0.92 | 1.05 | 0.95 |
| 0.95 | 0.7  | 0.66 | 0.7  | 1.4  | 0.75 | 1    | 0.7   | 1.4  | 5.23 | 1.02 |
| 1.22 | 0.93 | 0.87 | 0.93 | 2.13 | 1.09 | 0.78 | 1.29  | 2.13 | 1.07 | 0.87 |
| 1    | 0.94 | 1.45 | 0.94 | 0.71 | 1.1  | 1.17 | 0.91  | 0.71 | 1.32 | 1.15 |
| 0.95 | 0.68 | 0.62 | 0.68 | 1.63 | 0.76 | 0.93 | 0.52  | 1.63 | 3    | 1.11 |
| 0.55 | 0.73 | 1.18 | 0.73 | 0.9  | 1.96 | 0.87 | 0.95  | 0.9  | 1.58 | 1.06 |
| 0.64 | 0.83 | 0.9  | 0.83 | 0.93 | 0.96 | 1.69 | 0.65  | 0.93 | 0.87 | 1.27 |
| 1.05 | 0.92 | 0.87 | 0.92 | 0.98 | 1.11 | 0.6  | 0.91  | 0.98 | 0.91 | 0.98 |
| 0.89 | 0.91 | 0.92 | 0.91 | 0.92 | 1    | 0.9  | 0.93  | 0.92 | 2.86 | 1.01 |
| 0.99 | 0.92 | 3.13 | 0.92 | 0.97 | 0.91 | 0.91 | 1.07  | 0.97 | 1.02 | 0.9  |
| 1.08 | 1.06 | 1.35 | 1.06 | 1.52 | 1.14 | 1.18 | 0.92  | 1.52 | 0.76 | 0.94 |
| 1.08 | 1.19 | 0.96 | 1.19 | 0.86 | 0.92 | 1.07 | 0.92  | 0.86 | 1.18 | 1.07 |
| 0.88 | 0.78 | 1.89 | 0.78 | 0.97 | 1    | 0.98 | 0.91  | 0.97 | 0.64 | 0.95 |
| 0.76 | 1.21 | 0.83 | 1.21 | 1.24 | 1.31 | 0.72 | 1.12  | 1.24 | 3.68 | 0.8  |
| 0.63 | 1.12 | 0.77 | 1.12 | 0.99 | 1.22 | 0.87 | 1.18  | 0.99 | 1.32 | 0.82 |
| 1.27 | 1    | 1.13 | 1    | 1.01 | 0.57 | 1.16 | 1.64  | 1.01 | 0.93 | 1.12 |
| 0.67 | 0.57 | 3    | 0.57 | 1.33 | 8.36 | 3.22 | 0.35  | 1.33 | 1.94 | 0.71 |
| 0.65 | 0.96 | 0.91 | 0.96 | 1.34 | 0.99 | 0.99 | 0.76  | 1.34 | 2.21 | 0.95 |
| 1.84 | 3.2  | 1    | 3.2  | 0.89 | 0.77 | 1.27 | 0.52  | 0.89 | 0.95 | 0.87 |
| 1.04 | 1.13 | 0.98 | 1.13 | 1.27 | 0.83 | 1.05 | 0.88  | 1.27 | 3.03 | 0.95 |
| 0.85 | 1.07 | 0.21 | 1.07 | 0.27 | 1.62 | 0.88 | 2.52  | 0.27 | 0.08 | 0.86 |
| 1.05 | 0.87 | 1.11 | 0.87 | 0.84 | 1.23 | 1.07 | 1.21  | 0.84 | 1.16 | 1.1  |
| 1.06 | 0.95 | 1.06 | 0.95 | 0.93 | 0.88 | 1.07 | 0.88  | 0.93 | 1.09 | 1.07 |
| 1.02 | 1.12 | 0.97 | 1.12 | 0.93 | 1.1  | 0.88 | 1.01  | 0.93 | 0.98 | 0.93 |
| 1.05 | 0.84 | 0.92 | 0.84 | 0.86 | 0.92 | 0.89 | 0.93  | 0.86 | 0.97 | 1.05 |
| 1.27 | 1.16 | 0.86 | 1.16 | 1.49 | 0.82 | 1.41 | 17.28 | 1.49 | 0.85 | 0.75 |
| 1.28 | 0.84 | 1.07 | 0.84 | 0.88 | 0.92 | 1.08 | 1.58  | 0.88 | 0.8  | 1.08 |
| 0.89 | 1    | 1.1  | 1    | 0.75 | 0.87 | 1.26 | 2.91  | 0.75 | 2.32 | 0.93 |



|      |      |      |      |       |      |      |       |       |      |      |
|------|------|------|------|-------|------|------|-------|-------|------|------|
| 0.78 | 1.18 | 1.53 | 1.18 | 0.74  | 1.36 | 1.73 | 1.18  | 0.74  | 1.39 | 0.99 |
| 0.95 | 0.94 | 0.52 | 0.94 | 1.34  | 1.42 | 0.88 | 0.51  | 1.34  | 0.83 | 0.81 |
| 0.88 | 0.83 | 0.98 | 0.83 | 0.78  | 0.81 | 0.89 | Inf   | 0.78  | 1.02 | 1.25 |
| 1.39 | 0.62 | 0.54 | 0.62 | 0.87  | 0.73 | 0.59 | 0.98  | 0.87  | 0.5  | 0.85 |
| 0.94 | 0.93 | 0.73 | 0.93 | 0.93  | 1.2  | 1.05 | 1.25  | 0.93  | 2.06 | 0.91 |
| 1.06 | 0.94 | 1.08 | 0.94 | 0.95  | 1.16 | 0.78 | 1.2   | 0.95  | 5.33 | 0.99 |
| 1.95 | 0.99 | 0.48 | 0.99 | 0.8   | 0.96 | 0.87 | 3.79  | 0.8   | 0.91 | 1.27 |
| 1.13 | 0.8  | 0.85 | 0.8  | 0.78  | 1.07 | 0.95 | 0.98  | 0.78  | 1.37 | 0.99 |
| 2.43 | 3.39 | 1.46 | 3.39 | 0.83  | 0.65 | 1    | 0.69  | 0.83  | 1.2  | 1.06 |
| 0.78 | 0.94 | 1.23 | 0.94 | 0.41  | 1.41 | 0.79 | 4.19  | 0.41  | 1.11 | 1.29 |
| 0.78 | 0.77 | 1.13 | 0.77 | 1.1   | 1.03 | 0.75 | 0.82  | 1.1   | 0.84 | 1.03 |
| 0.91 | 0.83 | 0.77 | 0.83 | 0.89  | 0.94 | 0.9  | 0.82  | 0.89  | 0.8  | 1.05 |
| 1.26 | 0.76 | 3.55 | 0.76 | 1.17  | 0.98 | 1.01 | 0.78  | 1.17  | 1.48 | 1.16 |
| 1.14 | 0.96 | 1.11 | 0.96 | 0.75  | 5.5  | 1.1  | 0.84  | 0.75  | 3.11 | 1.06 |
| 0.89 | 0.91 | 1.2  | 0.91 | 0.81  | 0.74 | 0.88 | 0.84  | 0.81  | 2.14 | 1.08 |
| 1.18 | 0.67 | 0.56 | 0.67 | 0.44  | 1.18 | 0.71 | 0.38  | 0.44  | 1.35 | 0.83 |
| 1.26 | 0.74 | 0.82 | 0.74 | 0.98  | 1.09 | 0.72 | 0.69  | 0.98  | 1.4  | 1.06 |
| 1.03 | 0.84 | 0.78 | 0.84 | 0.68  | 0.93 | 0.94 | 0.9   | 0.68  | 5.3  | 0.97 |
| 1.05 | 2.21 | 1.21 | 2.21 | 42.28 | 0.51 | 1.03 | 0.88  | 42.28 | 0.68 | 0.62 |
| 1.02 | 0.76 | 1.07 | 0.76 | 0.35  | 1.06 | 1.11 | 24.94 | 0.35  | 2.07 | 0.67 |
| 0.88 | 1.33 | 0.83 | 1.33 | 1.71  | 0.97 | 0.69 | 0.53  | 1.71  | 0.98 | 0.75 |
| 0.93 | 0.68 | 0.64 | 0.68 | 1.49  | 0.81 | 0.92 | 0.54  | 1.49  | 2.58 | 1.14 |
| 2.73 | 0.93 | 0.37 | 0.93 | 1.32  | 0.72 | 1.62 | 0.46  | 1.32  | 2.31 | 0.49 |
| 2.27 | 0.84 | 0.35 | 0.84 | 1.93  | 1.09 | 1.12 | 1.95  | 1.93  | 1.56 | 1.02 |
| 1.22 | 1.24 | 1.23 | 1.24 | 0.8   | 1    | 0.77 | 1.54  | 0.8   | 0.87 | 1.07 |
| 1.22 | 1.33 | 1.15 | 1.33 | 0.72  | 1.12 | 1.14 | 1.04  | 0.72  | 1.53 | 0.93 |
| 0.68 | 0.82 | 0.36 | 0.82 | 1.1   | 1.64 | 1.19 | 0.82  | 1.1   | 1.59 | 0.95 |
| 0.78 | 1.14 | 1.34 | 1.14 | 0.68  | 1.18 | 2.2  | 3.16  | 0.68  | 0.66 | 0.82 |
| 1.89 | 0.75 | 2.01 | 0.75 | 0.72  | 1.19 | 1.15 | 0.63  | 0.72  | 1.43 | 1.05 |
| 0.66 | 1.99 | 0.26 | 1.99 | 0.27  | 1.44 | 0.79 | 1.44  | 0.27  | 2.53 | 0.85 |
| 1.28 | 1.27 | 0.87 | 1.27 | 0.64  | 0.95 | 0.84 | 1.24  | 0.64  | 0.74 | 0.74 |
| 1.13 | 0.94 | 1.68 | 0.94 | 0.11  | 1.72 | 0.93 | 2.12  | 0.11  | 0.97 | 1.33 |
| 1.94 | 1.4  | 1.19 | 1.4  | 1.44  | 1.75 | 0.97 | 0.41  | 1.44  | 5.32 | 1.06 |

|      |      |      |      |       |       |      |      |       |       |      |
|------|------|------|------|-------|-------|------|------|-------|-------|------|
| 0.96 | 1.07 | 0.88 | 1.07 | 0.86  | 1.01  | 0.93 | 0.94 | 0.86  | 1.22  | 1.05 |
| 1.14 | 1.06 | 1.21 | 1.06 | 1.17  | 0.98  | 1.17 | 1.15 | 1.17  | 1.06  | 1.1  |
| 0.39 | 2.45 | 0.73 | 2.45 | 1.02  | 7     | 0.49 | 0.08 | 1.02  | 1.23  | 6.31 |
| 1.04 | 0.59 | 0.92 | 0.59 | 0.45  | 1.18  | 0.94 | 0.56 | 0.45  | 1.03  | 0.75 |
| 1.01 | 0.73 | 0.84 | 0.73 | 0.82  | 0.87  | 0.89 | 2.53 | 0.82  | 4.08  | 1.07 |
| 1.3  | 1.28 | 1.05 | 1.28 | 1.32  | 0.97  | 1.05 | 1.27 | 1.32  | 1.6   | 1.1  |
| 1.27 | 1.25 | 1.14 | 1.25 | 0.89  | 1.19  | 1.13 | 0.84 | 0.89  | 1.18  | 1.03 |
| 0.95 | 1.07 | 0.8  | 1.07 | 1.09  | 1.05  | 0.96 | 0.58 | 1.09  | 0.87  | 0.96 |
| 1.36 | 1.24 | 1.33 | 1.24 | 0.78  | 1.37  | 0.69 | 2.63 | 0.78  | 0.72  | 0.92 |
| 1.06 | 1.08 | 1.19 | 1.08 | 0.57  | 1.74  | 0.87 | 1.13 | 0.57  | 0.64  | 0.79 |
| 0.85 | 1.25 | 1.14 | 1.25 | 0.87  | 1.08  | 1.07 | 1.53 | 0.87  | 0.94  | 1.07 |
| 3.65 | 1.69 | 2.33 | 1.69 | 14.57 | 30.87 | 0.57 | 6.27 | 14.57 | 35.96 | 79.4 |
| 1.29 | 1.35 | 0.29 | 1.35 | 0.89  | 1     | 1.4  | 0.86 | 0.89  | 1.64  | 1    |
| 1    | 1.16 | 0.76 | 1.16 | 0.76  | 0.73  | 0.72 | 1.3  | 0.76  | 1.02  | 0.84 |

| 200632_s_at | 202315_s_at | 216836_s_at | 204369_at | 219388_at | 200958_s_at | 209360_s_at | 213139_at | 209863_s_at | 201746_at | 219528_s_at |
|-------------|-------------|-------------|-----------|-----------|-------------|-------------|-----------|-------------|-----------|-------------|
| 3.09        | 1.06        | 1.12        | 1.05      | 1.78      | 0.92        | 0.89        | 0.6       | 1.16        | 0.92      | 0.86        |
| 1.76        | 1.38        | 0.93        | 1.48      | 1.05      | 1.51        | 0.51        | 0.48      | 0.85        | 0.88      | 0.54        |
| 0.87        | 1.01        | 1.06        | 1.85      | 0.97      | 1.03        | 1.03        | 2.23      | 0.55        | 0.94      | 0.92        |
| 1.07        | 1.36        | 0.95        | 0.99      | 1.07      | 1.1         | 1.19        | 4.27      | 1.12        | 1.02      | 1.17        |
| 1.22        | 0.75        | 0.7         | 1.19      | 0.58      | 1.07        | 1.29        | 0.63      | 4.7         | 0.89      | 2.28        |
| 0.83        | 6.11        | 1.19        | 1.44      | 1.65      | 1.09        | 0.8         | 2.82      | 6.25        | 0.95      | 1.22        |
| 0.69        | 0.88        | 0.48        | 0.96      | 0.11      | 1.76        | 0.63        | 1.12      | 0.67        | 0.14      | 0.53        |
| 0.7         | 1.03        | 1.01        | 1.09      | 0.7       | 1.16        | 0.87        | 0.67      | 0.6         | 1.36      | 0.54        |
| 1.03        | 0.5         | 0.79        | 1.35      | 1.43      | 1.39        | 0.72        | 0.45      | 2.39        | 0.82      | 0.88        |
| 0.52        | 0.71        | 0.88        | 0.64      | 0.69      | 1.05        | 0.68        | 3.08      | 1.81        | 1.42      | 0.46        |
| 0.91        | 0.8         | 0.96        | 1.03      | 0.16      | 0.91        | 1.09        | 1.35      | 0.99        | 0.68      | 0.98        |
| 1.24        | 1.24        | 0.76        | 0.98      | 1.79      | 0.97        | 0.82        | 0.54      | 1.08        | 0.93      | 1.4         |
| 0.46        | 1.31        | 0.95        | 1.09      | 0.95      | 0.99        | 0.77        | 0.59      | 0.91        | 1.26      | 1.48        |
| 0.12        | 0.71        | 1.11        | 2.73      | 1.02      | 0.46        | 0.71        | 3.74      | 8.89        | 0.19      | 2.68        |
| 2.16        | 1.08        | 0.97        | 1.42      | 0.8       | 1.25        | 1.26        | 1.71      | 0.85        | 1.11      | 1           |
| 0.65        | 0.69        | 0.93        | 0.75      | 0.99      | 1.07        | 0.8         | 5.13      | 1.42        | 1.33      | 1.51        |
| 1           | 1.36        | 1.03        | 0.96      | 3.63      | 1.06        | 0.88        | 0.79      | 1.69        | 0.99      | 1.28        |
| 5.32        | 1.18        | 0.76        | 1.03      | 0.88      | 1.16        | 1.39        | 1.47      | 1.43        | 1.13      | 1.13        |
| 2.7         | 1.5         | 0.64        | 1.19      | 0.97      | 0.9         | 1.2         | 0.79      | 3.85        | 0.1       | 2.01        |
| 0.82        | 1.97        | 2.25        | 0.16      | 0.73      | 0.87        | 8.37        | 0.41      | 3.05        | 0.96      | 1.94        |
| 0.97        | 1.19        | 1.08        | 0.47      | 4.39      | 0.93        | 0.8         | 3.75      | 1.63        | 1.87      | 1.29        |
| 8.3         | 1.9         | 1.39        | 1.16      | 0.94      | 0.87        | 1.45        | 1.43      | 33.05       | 3.15      | 5.07        |
| 1.38        | 1.03        | 1.17        | 0.83      | 0.92      | 1.03        | 1.1         | 1.05      | 0.16        | 1.32      | 1.75        |
| 0.07        | 0.57        | 1.23        | 1.08      | 0.06      | 1.2         | 1.03        | 0.3       | 0.01        | 0.95      | 0.03        |
| 1.13        | 0.5         | 1.2         | 0.69      | 4.07      | 0.73        | 1.89        | 24.58     | 2.92        | 0.63      | 0.13        |
| 0.63        | 1.22        | 1.05        | 0.56      | 0.85      | 0.7         | 0.94        | 0.53      | 1.1         | 1.11      | 0.63        |
| 0.67        | 1.17        | 0.43        | 1.22      | 1.3       | 0.97        | 0.9         | 0.82      | 0.73        | 1.93      | 1.07        |
| 1.47        | 4.53        | 0.97        | 1.54      | 5.84      | 2.33        | 1.03        | 2.22      | 19.68       | 6.62      | 2.73        |
| 9.12        | 1.8         | 3.04        | 1         | 1.77      | 1.24        | 0.4         | 3.69      | 1.43        | 0.15      | 0.73        |
| 1.2         | 1.02        | 0.95        | 1.12      | 2.4       | 1.08        | 1.03        | 1.6       | 4.47        | 0.73      | 1.32        |

|      |      |      |      |      |      |      |       |      |      |       |
|------|------|------|------|------|------|------|-------|------|------|-------|
| 0.74 | 0.68 | 0.44 | 1.05 | 1.5  | 0.8  | 0.79 | 1.79  | 0.89 | 0.56 | 2.26  |
| 0.23 | 1.27 | 1.28 | 0.43 | 0.15 | 2.69 | 0.53 | 9.91  | 1.5  | 1.38 | 0.17  |
| 0.96 | 1.11 | 1.01 | 1.13 | 1.16 | 1.03 | 1    | 2.37  | 1.05 | 1.07 | 1.27  |
| 0.48 | 1.18 | 0.91 | 0.55 | 2.26 | 0.85 | 0.31 | 0.39  | 0.27 | 1.27 | 0.31  |
| 0.88 | 1.23 | 1.26 | 1.85 | 0.65 | 5.04 | 0.71 | 0.35  | 1.21 | 16   | 0.31  |
| 0.83 | 1.55 | 1.45 | 0.51 | 4.2  | 1.47 | 2.58 | 0.83  | 1.58 | 1.65 | 18.81 |
| 2.96 | 1.07 | 0.53 | 0.85 | 1.96 | 2.84 | 0.32 | 1.32  | 0.83 | 0.57 | 3.37  |
| 0.83 | 1.18 | 0.8  | 1    | 2.29 | 0.93 | 1.05 | 0.9   | 1.18 | 0.88 | 1.33  |
| 0.24 | 1.06 | 0.98 | 1.03 | 0.96 | 1.1  | 0.82 | 0.83  | 0.81 | 1.24 | 0.32  |
| 1.5  | 1.07 | 0.62 | 1.65 | 0.03 | 2.2  | 2.14 | 31.56 | 0.18 | 1.01 | 0.04  |
| 1.29 | 1.17 | 1.34 | 0.95 | 0.83 | 0.98 | 2.8  | 0.63  | 2.77 | 2.01 | 1.11  |
| 0.99 | 1.08 | 0.88 | 1    | 1.18 | 0.94 | 0.78 | 1.14  | 3.47 | 0.95 | 1.2   |
| 1.18 | 1.15 | 0.95 | 1.32 | 1    | 1.36 | 1.59 | 0.61  | 0.35 | 0.26 | 1.07  |
| 0.49 | 1.71 | 0.6  | 1.43 | 0.92 | 1.76 | 2.86 | 1.13  | 0.58 | 2.55 | 1.69  |
| 1.16 | 0.99 | 0.84 | 1.19 | 0.95 | 1.17 | 1.53 | 0.69  | 0.56 | 0.41 | 1.12  |
| 3.5  | 1.91 | 0.99 | 1.23 | 5.09 | 1.28 | 2.83 | 4.09  | 7.81 | 1.09 | 1.42  |
| 1.41 | 0.94 | 1.18 | 0.94 | 1.08 | 0.79 | 1.08 | 1.06  | 1.03 | 0.97 | 1.5   |
| 0.8  | 1.17 | 1.09 | 1.18 | 1.07 | 0.98 | 1.36 | 2.72  | 10.7 | 0.81 | 3.15  |
| 0.93 | 0.97 | 1.15 | 1.07 | 0.95 | 0.98 | 1.05 | 1.13  | 5.14 | 0.86 | 0.89  |
| 8.87 | 1.18 | 1.01 | 0.95 | 7.24 | 1.23 | 0.77 | 1.79  | 4.32 | 0.69 | 1.69  |
| 0.51 | 0.79 | 0.97 | 1.1  | 1.09 | 0.83 | 0.74 | 0.97  | 2.17 | 0.96 | 0.5   |
| 0.84 | 0.92 | 0.72 | 0.83 | 0.91 | 0.76 | 1.21 | 0.68  | 0.34 | 1.05 | 1.07  |
| 0.53 | 0.74 | 1.23 | 1.01 | 1.03 | 0.92 | 1.09 | 1.86  | 1.03 | 1.09 | 1.38  |
| 4.03 | 1.36 | 0.88 | 1.22 | 1.53 | 1.34 | 4.23 | 7.72  | 8.03 | 0.81 | 0.96  |
| 0.94 | 1.61 | 0.35 | 1.03 | 0.52 | 1.35 | 0.58 | 0.88  | 3.21 | 0.35 | 4.16  |
| 0.69 | 1.35 | 0.87 | 1.01 | 0.88 | 0.88 | 0.57 | 0.52  | 0.1  | 1.48 | 0.76  |
| 0.52 | 2.33 | 1.16 | 0.5  | 4.46 | 0.94 | 1.32 | 0.46  | 1.23 | 0.93 | 4.98  |
| 1.66 | 1.04 | 1.97 | 1.99 | 1.01 | 0.89 | 2.78 | 0.01  | 1.43 | 1.99 | 1.61  |
| 2.03 | 1.07 | 1.55 | 1.09 | 1.02 | 1.07 | 1.1  | 0.83  | 1.14 | 0.25 | 0.71  |
| 0.99 | 1.36 | 1.1  | 1.09 | 1.07 | 1.19 | 0.91 | 0.45  | 0.4  | 0.41 | 0.66  |
| 1.7  | 1.27 | 0.75 | 0.91 | 0.77 | 1.46 | 3.68 | 1.67  | 2.69 | 0.73 | 0.76  |
| 1.21 | 1.23 | 1.86 | 0.83 | 1.05 | 0.78 | 1.32 | 2.36  | 1.38 | 0.79 | 0.45  |
| 1.07 | 1.16 | 0.68 | 1.24 | 1.56 | 1.02 | 2.64 | 2.03  | 1.25 | 1.14 | 1     |

|       |      |      |      |      |       |       |       |       |      |       |
|-------|------|------|------|------|-------|-------|-------|-------|------|-------|
| 2.1   | 0.74 | 1.26 | 0.89 | 1.77 | 1.33  | 1.05  | 24.09 | 0.71  | 0.91 | 0.74  |
| 0.88  | 1.17 | 1.43 | 1.02 | 0.79 | 0.8   | 0.94  | 0.91  | 7.16  | 1.49 | 21.22 |
| 2.37  | 1.03 | 0.95 | 1.37 | 2.72 | 1.08  | 0.89  | 3.25  | 3.92  | 0.89 | 0.65  |
| 2.16  | 1.19 | 5.95 | 1.16 | 3.78 | 1.27  | 2.76  | 9.22  | 1.7   | 0.87 | 1.23  |
| 1     | 1.01 | 1.04 | 1.15 | 9.16 | 0.98  | 1.17  | 1.19  | 2.75  | 0.85 | 0.78  |
| 1.24  | 0.81 | 0.85 | 0.97 | 0.78 | 1.11  | 0.9   | 1.13  | 1.07  | 1.35 | 0.78  |
| 0.38  | 1.67 | 2.02 | 1.15 | 1.08 | 0.19  | 0.65  | 0.12  | 3.44  | 1.65 | 2.59  |
| 4.27  | 1.87 | 1.41 | 0.99 | 0.56 | 1.1   | 0.92  | 2.54  | 0.21  | 0.98 | 0.82  |
| 2.31  | 1.91 | 0.82 | 0.77 | 1.05 | 1.08  | 3.41  | 0.99  | 0.69  | 0.92 | 2.66  |
| 0.7   | 0.89 | 0.84 | 1.67 | 1.67 | 1.3   | 0.92  | 0.86  | 0.8   | 1.12 | 1.04  |
| 1.29  | 9.29 | 8.81 | 1.55 | 1.38 | 0.97  | 0.91  | 2.33  | 2.12  | 1.34 | 0.98  |
| 3.42  | 0.86 | 0.71 | 1.11 | 1    | 1.22  | 11.73 | 5.46  | 0.07  | 0.9  | 1.32  |
| 0.8   | 0.33 | 1.15 | 0.97 | 2.58 | 1.27  | 1.23  | 3.56  | 0.8   | 1.19 | 1.21  |
| 0.94  | 1.76 | 0.9  | 1.57 | 3.32 | 1.02  | 1.45  | 0.42  | 3.79  | 1.01 | 2.54  |
| 0.68  | 1.08 | 0.67 | 1.58 | 0.6  | 1.05  | 1.03  | 0.5   | 0.44  | 0.42 | 0.2   |
| 1.51  | 0.33 | 0.22 | 6.5  | 0.09 | 27.08 | 2.12  | 42.98 | 0.13  | 4.36 | 0.07  |
| 2.62  | 0.85 | 1.99 | 1.11 | 0.96 | 1.17  | 1.45  | 1     | 0.73  | 1.36 | 2.74  |
| 0.63  | 1.02 | 0.68 | 0.76 | 0.76 | 1.83  | 1.2   | 1.36  | 0.45  | 0.32 | 0.52  |
| 1.41  | 0.88 | 1.2  | 1.13 | 1.49 | 1.56  | 0.78  | 1.27  | 1.22  | 0.9  | 1.17  |
| 1.01  | 1.11 | 2.1  | 1.31 | 1.8  | 1.03  | 0.65  | 5.05  | 1.67  | 0.9  | 6.91  |
| 11.62 | 2.15 | 1.82 | 0.69 | 1.89 | 1.01  | 8.44  | 0.51  | 0.91  | 0.72 | 0.54  |
| 2.62  | 1.01 | 1.7  | 1.08 | 1.27 | 1.11  | 6.51  | 1.03  | 1.23  | 0.91 | 0.98  |
| 0.86  | 0.96 | 0.61 | 0.96 | 0.56 | 1.75  | 0.57  | 0.87  | 0.71  | 0.11 | 0.39  |
| 1.25  | 1.42 | 0.85 | 0.69 | 0.94 | 0.98  | 0.46  | 0.54  | 0.63  | 0.97 | 1.54  |
| 3.59  | 0.84 | 1.08 | 1.16 | 1.06 | 1.01  | 1.02  | 0.73  | 1.02  | 1.37 | 1.86  |
| 1.47  | 0.91 | 0.87 | 0.75 | 0.64 | 1.06  | 1     | 0.82  | 0.54  | 0.91 | 0.77  |
| 1.04  | 1.07 | 1.04 | 0.63 | 3.6  | 0.76  | 0.78  | 0.77  | 0.35  | 1.03 | 0.92  |
| 0.92  | 1.25 | 1.17 | 1.02 | 1.02 | 0.9   | 0.84  | 1.13  | 1.31  | 1.09 | 0.98  |
| 0.9   | 0.79 | 2.16 | 1.11 | 1.01 | 1.21  | 0.93  | 0.34  | 0.94  | 1.05 | 1.67  |
| 0.92  | 0.99 | 1.04 | 0.93 | 0.68 | 0.9   | 1     | 1.36  | 4.3   | 0.94 | 1.38  |
| 1.08  | 0.98 | 0.92 | 0.96 | 3.08 | 0.95  | 1.38  | 1.13  | 1.33  | 1.22 | 1.41  |
| 0.82  | 3.06 | 1.17 | 0.92 | 1.02 | 1.42  | 2.6   | 1.31  | 5.53  | 0.56 | 0.51  |
| 1.8   | 0.98 | 1.52 | 1.26 | 0.1  | 1.15  | 0.79  | 2.88  | 20.43 | 1.08 | 0.95  |

|      |      |      |      |      |      |      |       |      |      |       |
|------|------|------|------|------|------|------|-------|------|------|-------|
| 0.86 | 0.83 | 1.06 | 0.99 | 1.22 | 0.84 | 1.03 | 0.66  | 1.53 | 0.94 | 1.49  |
| 1.02 | 1.26 | 2.03 | 0.68 | 1.08 | 0.96 | 0.74 | 1.22  | 4.81 | 0.86 | 0.86  |
| 0.8  | 1.17 | 1.11 | 0.97 | 0.82 | 0.97 | 1.1  | 2.66  | 0.58 | 1.42 | 1.23  |
| 1.39 | 1.12 | 0.54 | 0.87 | 1.28 | 1.39 | 3.53 | 1.83  | 1.38 | 0.96 | 3.55  |
| 0.78 | 0.97 | 1.1  | 1.1  | 0.53 | 1.79 | 1.28 | 1.75  | 1.29 | 1    | 1.55  |
| 0.46 | 1.01 | 0.33 | 0.29 | 0.43 | 1.44 | 0.34 | 3.24  | 1.17 | 0.73 | 0.4   |
| 0.91 | 1.05 | 0.95 | 1.1  | 1.83 | 1.03 | 0.86 | 1.45  | 1.32 | 1.13 | 1.12  |
| 1.17 | 1.14 | 0.83 | 0.71 | 0.8  | 1.07 | 1.23 | 1.16  | 0.44 | 1.12 | 1.23  |
| 2.16 | 0.65 | 0.63 | 1.35 | 0.68 | 1.9  | 0.79 | 1.29  | 0.98 | 0.75 | 1     |
| 1.53 | 1.26 | 1.08 | 1.2  | 0.9  | 1.84 | 1.04 | 4.37  | 3.09 | 1.33 | 0.63  |
| 0.94 | 0.94 | 1.05 | 0.93 | 2.11 | 0.91 | 1.18 | 0.68  | 0.46 | 1.43 | 0.78  |
| 2.22 | 0.98 | 1.02 | 0.97 | 0.86 | 0.82 | 1.25 | 18.48 | 1.29 | 1.05 | 1.6   |
| 1.65 | 1.06 | 0.92 | 0.86 | 1.42 | 0.96 | 0.71 | 0.96  | 3.82 | 0.79 | 2.97  |
| 0.78 | 1.22 | 0.86 | 0.71 | 1.09 | 0.9  | 0.53 | 0.68  | 0.52 | 1.16 | 0.47  |
| 2.66 | 1.05 | 1.1  | 1.19 | 0.58 | 1.21 | 0.55 | 1.81  | 0.72 | 1.08 | 1.35  |
| 1.16 | 1.78 | 2.6  | 1.01 | 3.19 | 0.86 | 1.3  | 2.83  | 1.07 | 1.14 | 0.81  |
| 2.37 | 0.9  | 1.68 | 0.87 | 1.99 | 0.74 | 1.1  | 2.35  | 1.66 | 1.26 | 1.08  |
| 1.83 | 1.48 | 5.28 | 1.21 | 3.63 | 1.09 | 3.21 | 9.33  | 1.43 | 0.91 | 0.65  |
| 2.25 | 1    | 1.48 | 1.05 | 0.5  | 0.94 | 0.85 | 0.53  | 1.98 | 1.14 | 1.17  |
| 3.75 | 0.74 | 0.83 | 0.89 | 1.24 | 0.85 | 1.06 | 1.32  | 0.94 | 0.7  | 0.97  |
| 0.49 | 1.19 | 0.62 | 1.06 | 0.78 | 1.42 | 0.84 | 1.26  | 0.73 | 0.7  | 0.62  |
| 0.89 | 0.81 | 2.19 | 1.25 | 0.64 | 0.88 | 1.13 | 0.74  | 0.43 | 1.09 | 0.97  |
| 1.65 | 1.04 | 1.02 | 0.92 | 1.18 | 0.89 | 1.39 | 0.79  | 0.96 | 1.03 | 1.29  |
| 0.58 | 0.85 | 1.74 | 1.1  | 0.95 | 0.25 | 0.87 | 0.39  | 1.06 | 1.63 | 9.86  |
| 1.57 | 0.83 | 2.39 | 0.74 | 1.12 | 0.77 | 1.04 | 7.96  | 1.07 | 1.31 | 0.72  |
| 1.08 | 0.82 | 0.95 | 1.16 | 1.07 | 0.96 | 1.49 | 1.92  | 4.19 | 1.21 | 0.97  |
| 1.2  | 1.37 | 1.26 | 0.91 | 0.96 | 1.26 | 1.2  | 1.21  | 1.64 | 1.03 | 1.8   |
| 1.1  | 1.06 | 1.16 | 0.98 | 1.59 | 1.02 | 0.85 | 1     | 1.42 | 1.32 | 2.24  |
| 1.32 | 1.24 | 1.45 | 0.75 | 1.21 | 0.41 | 1.07 | 0.68  | 0.31 | 0.52 | 0.8   |
| 0.95 | 1.18 | 0.98 | 1    | 1.09 | 0.97 | 0.92 | 1.9   | 0.73 | 0.94 | 1.04  |
| 0.6  | 0.68 | 1.2  | 0.9  | 1.13 | 0.97 | 0.95 | 0.65  | 4.59 | 5.78 | 0.9   |
| 0.88 | 1.17 | 1.43 | 1.02 | 0.79 | 0.8  | 0.94 | 0.91  | 7.16 | 1.49 | 21.22 |
| 0.9  | 1.01 | 0.82 | 0.91 | 0.87 | 1.15 | 0.81 | 0.87  | 0.93 | 0.97 | 0.75  |

|      |      |      |      |      |      |       |      |       |      |       |
|------|------|------|------|------|------|-------|------|-------|------|-------|
| 0.89 | 0.86 | 1.02 | 1.29 | 0.77 | 1.35 | 0.36  | 2.46 | 0.26  | 1.58 | 1.12  |
| 2.03 | 0.99 | 1.16 | 1.21 | 1.26 | 0.76 | 0.84  | 2.9  | 1.48  | 0.93 | 1.4   |
| 0.7  | 1.05 | 0.91 | 1.29 | 2.26 | 1.16 | 0.7   | 2.18 | 1.62  | 1.09 | 2     |
| 0.77 | 1.05 | 1.52 | 0.99 | 0.95 | 1.04 | 3.24  | 1.16 | 1.02  | 1.28 | 10.61 |
| 1.38 | 0.93 | 0.98 | 0.82 | 1.95 | 1.07 | 0.82  | 0.9  | 0.68  | 1.35 | 3     |
| 1.06 | 0.89 | 0.97 | 0.94 | 1.11 | 0.92 | 1.01  | 1    | 0.09  | 0.75 | 0.44  |
| 1.11 | 0.97 | 0.8  | 0.98 | 0.92 | 1.05 | 0.86  | 0.67 | 0.73  | 0.89 | 0.45  |
| 1.11 | 0.99 | 2.37 | 0.76 | 0.95 | 1.13 | 0.8   | 1.4  | 0.98  | 0.98 | 0.64  |
| 1.07 | 1.01 | 0.81 | 0.88 | 1.95 | 0.93 | 1.33  | 1.15 | 0.09  | 1.3  | 0.37  |
| 0.92 | 0.8  | 1.26 | 1.4  | 2.08 | 1.04 | 0.84  | 0.17 | 10.54 | 1.24 | 1.7   |
| 0.97 | 0.86 | 0.82 | 0.95 | 2.27 | 1.08 | 0.47  | 0.05 | 8.74  | 0.96 | 1.65  |
| 1.21 | 0.93 | 0.84 | 0.8  | 0.87 | 1.3  | 0.92  | 1.65 | 3.13  | 1.17 | 0.97  |
| 1.42 | 1.27 | 3.87 | 1.17 | 3.38 | 1.23 | 2.59  | 9.81 | 1.38  | 0.88 | 1.09  |
| 1.52 | 0.74 | 0.84 | 0.89 | 0.76 | 0.94 | 0.67  | 0.43 | 0.97  | 0.88 | 1.03  |
| 1.2  | 0.58 | 1.24 | 2.13 | 0.78 | 2.77 | 1.03  | 4.55 | 4.09  | 0.29 | 1.23  |
| 1.05 | 1.03 | 1.59 | 1    | 0.78 | 0.61 | 1     | 4.35 | 3.22  | 1.01 | 3.33  |
| 1.22 | 0.87 | 1.11 | 0.7  | 1.02 | 1.09 | 1.58  | 0.72 | 0.45  | 0.95 | 1.49  |
| 0.9  | 1.06 | 0.93 | 0.83 | 0.79 | 1.1  | 0.72  | 0.91 | 0.75  | 1.12 | 0.97  |
| 1.38 | 1.15 | 0.86 | 0.67 | 1.44 | 1.24 | 0.74  | 0.85 | 3.96  | 3.3  | 1.46  |
| 0.59 | 1.29 | 1.01 | 0.97 | 1.07 | 0.86 | 0.97  | 1.2  | 0.68  | 1.5  | 0.3   |
| 1.33 | 0.59 | 0.77 | 1.03 | 1.1  | 0.82 | 1.35  | 0.53 | 1.3   | 1.02 | 1.24  |
| 0.94 | 0.78 | 0.64 | 1.16 | 1.04 | 0.79 | 1.23  | 1.33 | 1.06  | 1.41 | 0.41  |
| 0.94 | 1.23 | 1.29 | 1.14 | 1.47 | 0.97 | 1.16  | 2.49 | 1     | 1.13 | 1.26  |
| 1.26 | 1.31 | 0.9  | 0.98 | 0.37 | 0.96 | 0.27  | 1.04 | 0.77  | 1.01 | 0.74  |
| 0.62 | 1.04 | 0.97 | 0.74 | 2.85 | 0.99 | 0.93  | 0.99 | 4.51  | 1    | 0.94  |
| 0.93 | 1.07 | 1.1  | 1.12 | 1.19 | 0.93 | 0.78  | 0.58 | 0.68  | 1.09 | 1.07  |
| 0.89 | 1.19 | 1.12 | 1.16 | 1.83 | 1.24 | 0.66  | 0.74 | 0.98  | 1.31 | 0.62  |
| 1.26 | 0.98 | 0.83 | 1.04 | 0.86 | 0.64 | 1.37  | 1.45 | 0.92  | 0.9  | 1.67  |
| 0.85 | 0.97 | 1.05 | 1.1  | 0.72 | 1.09 | 3.08  | 1.1  | 1.4   | 1.01 | 1.88  |
| 1.04 | 1.08 | 0.98 | 0.74 | 4.5  | 0.98 | 1.12  | 0.67 | 6     | 0.83 | 2.86  |
| 0.89 | 0.83 | 1.36 | 1.11 | 1.25 | 1.03 | 0.98  | 2.76 | 1.2   | 1.24 | 1.58  |
| 1.66 | 0.92 | 0.96 | 1.03 | 1.08 | 1.05 | 13.94 | 6.27 | 0.6   | 0.95 | 0.78  |
| 0.97 | 1.03 | 1.23 | 0.96 | 1.26 | 0.94 | 0.98  | 1.28 | 1.04  | 1.06 | 2.84  |

|      |      |      |      |       |      |      |       |      |      |      |
|------|------|------|------|-------|------|------|-------|------|------|------|
| 1.97 | 1.98 | 0.7  | 0.89 | 1.07  | 1.64 | 3.9  | 0.77  | 0.54 | 0.81 | 2    |
| 0.89 | 1.05 | 1.11 | 1.24 | 1.15  | 1.18 | 1.05 | 2.1   | 1.47 | 1.22 | 1.57 |
| 0.86 | 1.01 | 0.93 | 1.17 | 1.78  | 1.01 | 0.97 | 0.89  | 0.88 | 0.97 | 1.19 |
| 1.27 | 0.61 | 1.04 | 2.11 | 1.5   | 1.14 | 1    | 0.9   | 0.67 | 3.63 | 1.83 |
| 0.16 | 0.9  | 0.49 | 1.45 | 0.78  | 0.96 | 0.78 | 2.33  | 2.94 | 0.93 | 1.56 |
| 1.32 | 1.01 | 0.95 | 1.01 | 1.23  | 0.99 | 1.01 | 1.18  | 2.3  | 1.62 | 1.74 |
| 0.78 | 0.76 | 0.51 | 1.09 | 1.46  | 0.89 | 0.78 | 2.62  | 0.95 | 0.54 | 2.35 |
| 0.93 | 0.86 | 0.86 | 1.16 | 0.91  | 0.99 | 1.22 | 1.02  | 1.39 | 0.9  | 1.18 |
| 2.49 | 0.97 | 0.89 | 1.06 | 0.58  | 1.39 | 0.66 | 2.01  | 8.26 | 0.91 | 1.5  |
| 0.72 | 0.71 | 0.85 | 1.33 | 1.79  | 0.77 | 1.02 | 3.52  | 0.88 | 0.61 | 3.36 |
| 0.36 | 1    | 1.12 | 0.9  | 0.59  | 0.89 | 1.33 | 2.3   | 0.67 | 1.3  | 0.56 |
| 1.01 | 1.4  | 1.19 | 1.15 | 0.74  | 1.07 | 0.85 | 0.81  | 0.64 | 1.82 | 1.44 |
| 1.01 | 0.71 | 0.59 | 0.95 | 4.46  | 0.97 | 1    | 1.95  | 0.38 | 0.81 | 0.7  |
| 0.97 | 1.15 | 0.85 | 1.05 | 0.82  | 0.99 | 0.82 | 3.18  | 0.51 | 0.95 | 0.97 |
| 0.77 | 1.14 | 1.41 | 0.95 | 0.74  | 1.05 | 2.1  | 0.86  | 1.22 | 1.4  | 7.34 |
| 1.38 | 1.16 | 0.99 | 1.11 | 1.22  | 1.11 | 0.5  | 0.96  | 1.55 | 1.39 | 1.01 |
| 1.16 | 1.09 | 1.18 | 0.96 | 1.62  | 0.95 | 1.19 | 1.71  | 1.12 | 0.91 | 1.39 |
| 0.8  | 1.18 | 1.02 | 0.8  | 0.68  | 1.14 | 0.91 | 0.67  | 1.14 | 0.97 | 0.85 |
| 0.89 | 1.02 | 0.6  | 0.93 | 1.1   | 1.06 | 2.32 | 1.38  | 0.94 | 0.69 | 1    |
| 1.41 | 0.87 | 0.92 | 2.32 | 1.64  | 0.94 | 0.89 | 1.02  | 1.19 | 0.88 | 2.17 |
| 0.9  | 1.06 | 0.83 | 0.51 | 1.21  | 0.87 | 0.73 | 0.99  | 0.65 | 0.53 | 0.31 |
| 0.64 | 1.73 | 3.11 | 0.3  | 11.76 | 1.5  | 0.16 | 0.05  | 0.71 | 0.72 | 1.24 |
| 0.85 | 1.08 | 1.26 | 1.1  | 1.65  | 0.95 | 0.75 | 3.21  | 3.89 | 0.89 | 0.95 |
| 1.01 | 1.06 | 0.36 | 1.24 | 0.99  | 1.23 | 4.07 | 0.88  | 0.77 | 0.87 | 1.93 |
| 1.03 | 0.81 | 0.99 | 1    | 1.5   | 0.95 | 1.35 | 0.94  | 2.11 | 1.03 | 0.3  |
| 7.38 | 1.11 | 0.97 | 0.96 | 1.88  | 1.36 | 8.09 | 34.58 | 5.13 | 2.78 | 0.82 |
| 0.92 | 1.04 | 1.22 | 1.13 | 1.04  | 1.38 | 1.46 | 1.33  | 0.88 | 1.17 | 1.02 |
| 1.01 | 1    | 0.75 | 0.87 | 1.32  | 0.91 | 1.02 | 2.91  | 0.81 | 1.11 | 4.16 |
| 1.21 | 0.99 | 1.17 | 0.96 | 0.82  | 1    | 1.03 | 1.25  | 1.02 | 0.95 | 7.67 |
| 3.68 | 0.93 | 1.69 | 0.99 | 1.26  | 0.84 | 1.1  | 3.69  | 0.93 | 1.06 | 1.12 |
| 1.73 | 0.65 | 1.69 | 1.19 | 1.13  | 1.04 | 1.12 | 5.28  | 0.56 | 0.84 | 1.06 |
| 0.55 | 0.96 | 0.78 | 0.93 | 1     | 1.03 | 0.88 | 0.97  | 1.67 | 0.89 | 0.4  |
| 0.65 | 1.17 | 1.02 | 0.77 | 0.26  | 1.38 | 1.03 | 1.78  | 1.41 | 0.86 | 1.72 |



|       |      |      |      |      |      |      |      |      |      |      |
|-------|------|------|------|------|------|------|------|------|------|------|
| 1.86  | 1.45 | 1.45 | 0.93 | 1.05 | 1.01 | 1.09 | 1.32 | 1.61 | 0.83 | 0.61 |
| 0.33  | 1.2  | 0.9  | 1.25 | 0.72 | 0.87 | 1.5  | 0.31 | 0.69 | 1.12 | 1.68 |
| 0.91  | 1.06 | 0.91 | 0.84 | 0.96 | 1.15 | 1.08 | 1.42 | 1.05 | 1.06 | 0.31 |
| 0.22  | 0.54 | 0.64 | 0.87 | 0.58 | 1.13 | 0.73 | 0.89 | 0.46 | 0.66 | 0.91 |
| 1.32  | 0.91 | 1.06 | 0.89 | 0.97 | 0.94 | 0.85 | 1.29 | 0.77 | 0.85 | 1.11 |
| 0.64  | 0.89 | 0.84 | 1.36 | 1.24 | 1.08 | 1.98 | 1.15 | 0.81 | 0.64 | 3.54 |
| 1.33  | 0.77 | 1.2  | 0.74 | 0.61 | 1.08 | 0.97 | 0.88 | 0.21 | 0.83 | 0.63 |
| 0.76  | 0.87 | 0.79 | 1.14 | 0.65 | 0.97 | 0.72 | 1.1  | 0.51 | 1.13 | 0.78 |
| 1.43  | 1.81 | 0.47 | 0.77 | 1.25 | 1.34 | 3.12 | 1.8  | 0.74 | 0.99 | 2.32 |
| 0.61  | 1.12 | 1.84 | 1.36 | 3.01 | 1.65 | 0.85 | 0.77 | 0.79 | 0.98 | 1.22 |
| 1.02  | 0.86 | 0.91 | 0.75 | 0.82 | 1.12 | 0.74 | 0.79 | 1.22 | 1.26 | 0.96 |
| 1.09  | 1.1  | 1.11 | 1.26 | 0.54 | 0.94 | 0.62 | 0.79 | 1    | 0.82 | 1.7  |
| 0.67  | 1.1  | 0.82 | 0.83 | 0.81 | 1.35 | 0.93 | 1.55 | 0.16 | 1    | 1.07 |
| 0.46  | 0.94 | 1.96 | 0.88 | 1.11 | 1.06 | 0.86 | 1.78 | 2.34 | 4.58 | 0.87 |
| 1.44  | 0.95 | 0.82 | 1.23 | 1.19 | 1.38 | 0.97 | 0.99 | 1.31 | 1.06 | 1.12 |
| 0.65  | 0.82 | 0.51 | 1.26 | 0.76 | 0.95 | 1.2  | 0.94 | 3.36 | 0.81 | 3.16 |
| 1.58  | 0.79 | 0.74 | 0.98 | 0.44 | 1.09 | 0.74 | 1.27 | 1.91 | 0.6  | 0.8  |
| 0.66  | 0.96 | 1.07 | 0.9  | 1.12 | 0.93 | 1.01 | 0.33 | 1.1  | 1.14 | 0.98 |
| 1.2   | 0.89 | 3.64 | 1.07 | 0.57 | 1.38 | 2.72 | 2.77 | 3.43 | 1.4  | 0.8  |
| 0.2   | 0.5  | 0.46 | 1.1  | 0.08 | 2.09 | 0.9  | 1.08 | 0.04 | 1.14 | 0.04 |
| 0.67  | 0.87 | 1.26 | 0.9  | 1.33 | 0.87 | 1.78 | 3.85 | 1.32 | 0.75 | 3.26 |
| 0.71  | 0.66 | 0.61 | 1.17 | 1.66 | 0.73 | 0.91 | 2.24 | 0.86 | 0.6  | 2.77 |
| 0.17  | 0.99 | 0.65 | 0.63 | 1.99 | 0.6  | 1.05 | 0.26 | 0.21 | 1.07 | 0.64 |
| 1.6   | 1.18 | 0.58 | 0.65 | 2.3  | 0.9  | 1.42 | 2.03 | 0.12 | 0.59 | 0.67 |
| 0.78  | 1.14 | 0.83 | 1    | 0.63 | 1.07 | 1    | 0.98 | 1.1  | 0.89 | 1.15 |
| 0.89  | 1.24 | 1.29 | 0.37 | 0.81 | 0.61 | 0.83 | 1.86 | 0.83 | 1.11 | 7.21 |
| 0.43  | 0.57 | 1.09 | 0.92 | 0.85 | 0.84 | 0.59 | 5.62 | 1.15 | 1.19 | 1.97 |
| 1.13  | 1.19 | 1.2  | 1.01 | 0.13 | 1.24 | 0.94 | 0.53 | 0.71 | 1.19 | 0.4  |
| 3.92  | 0.86 | 0.95 | 0.95 | 1.4  | 0.97 | 0.79 | 1.26 | 0.52 | 0.61 | 1.9  |
| 40.94 | 0.41 | 0.48 | 1.54 | 1    | 0.89 | 1.66 | 3.93 | 0.15 | 0.5  | 16   |
| 1.54  | 1.02 | 0.71 | 0.91 | 0.1  | 1.59 | 1.83 | 1.4  | 0.91 | 1.41 | 0.49 |
| 0.86  | 1    | 1.13 | 1.16 | 0.92 | 1.01 | 0.93 | 2.48 | 1.02 | 0.98 | 1.92 |
| 0.8   | 2.45 | 1.36 | 0.46 | 1.67 | 0.41 | 1.13 | 0.65 | 0.56 | 0.64 | 0.52 |

|      |      |      |      |      |      |      |       |      |      |      |
|------|------|------|------|------|------|------|-------|------|------|------|
| 1.28 | 0.97 | 0.93 | 0.97 | 0.78 | 1.03 | 1.34 | 1.11  | 0.79 | 0.91 | 3.2  |
| 0.92 | 1.26 | 1.07 | 1.01 | 1.03 | 0.92 | 0.97 | 1.01  | 1.2  | 0.66 | 0.96 |
| 0.62 | 0.63 | 0.67 | 2.04 | 2.03 | 4.18 | 0.94 | 1.75  | 1.32 | 5.4  | 1.4  |
| 1.94 | 0.15 | 1.35 | 0.62 | 0.7  | 0.52 | 1.05 | 0.64  | 1.06 | 0.71 | 1.02 |
| 0.28 | 1.48 | 0.95 | 1.14 | 8.84 | 1.11 | 0.92 | 0.91  | 0.58 | 0.52 | 3.45 |
| 1.27 | 0.92 | 0.97 | 0.89 | 6.22 | 0.86 | 1.1  | 3.73  | 2.42 | 1.08 | 1.98 |
| 0.75 | 0.99 | 0.99 | 1    | 0.88 | 0.97 | 1.1  | 1.69  | 1.42 | 0.94 | 1.19 |
| 0.42 | 1.09 | 1.11 | 0.75 | 1.25 | 1.09 | 0.95 | 0.45  | 1.56 | 1.01 | 0.62 |
| 1.16 | 1.63 | 0.65 | 1.13 | 0.3  | 1.12 | 1.03 | 2.24  | 1.11 | 0.94 | 1.19 |
| 2.38 | 1.03 | 1.28 | 1.29 | 2.45 | 0.66 | 0.66 | 0.97  | 0.59 | 1.2  | 2.13 |
| 0.74 | 0.89 | 1.17 | 1.07 | 0.97 | 0.7  | 1.52 | 0.39  | 0.73 | 1.26 | 2.92 |
| 0.52 | 0.57 | 0.58 | 4    | 2.45 | 3.84 | 0.51 | 25.94 | 0.52 | 6.6  | 1.17 |
| 2.15 | 1.52 | 1.07 | 1.03 | 1.15 | 1.56 | 0.97 | 1.22  | 1.38 | 1.01 | 1.4  |
| 1.15 | 1.41 | 1.44 | 0.69 | 0.93 | 0.85 | 0.69 | 0.32  | 0.78 | 0.52 | 4.67 |

| 205883_at | 208944_at | 202344_at | 205402_x_at | 213721_at | 202724_s_at | 209602_s_at | 214438_at | 206536_s_at | 204790_at | 219388_at |
|-----------|-----------|-----------|-------------|-----------|-------------|-------------|-----------|-------------|-----------|-----------|
| 5.05      | 1.15      | 1.08      | 1.99        | 1.69      | 1.18        | 10.4        | 1.73      | 1.11        | 0.32      | 1.78      |
| 0.92      | 1.24      | 0.93      | 1.28        | 0.84      | 1.56        | 2.24        | 1.08      | 2.11        | 0.98      | 1.05      |
| 1.08      | 1.47      | 4.29      | 0.48        | 3.91      | 1.23        | 1.25        | 1.84      | 3.27        | 2.2       | 0.97      |
| 2.06      | 1.19      | 1.04      | 3.03        | 2.09      | 3.73        | 0.81        | 1.39      | 1.32        | 1.05      | 1.07      |
| 3.76      | 1.43      | 1.08      | 1.1         | 2.75      | 1.57        | 2.44        | 0.83      | 1.11        | 0.95      | 0.58      |
| 1.39      | 1.02      | 1.32      | 1.47        | 1.25      | 1.06        | 8.43        | 2.38      | 0.87        | 0.94      | 1.65      |
| 1.47      | 1.25      | 1.22      | 4.36        | 2.13      | 1.79        | 0.11        | 9.83      | 0.79        | 1.67      | 0.11      |
| 0.72      | 1.04      | 1.09      | 0.94        | 0.87      | 0.76        | 0.88        | 0.93      | 1.05        | 1.56      | 0.7       |
| 0.66      | 0.93      | 0.96      | 0.59        | 0.33      | 1.21        | 1.48        | 2.22      | 1.41        | 0.91      | 1.43      |
| 7.57      | 0.6       | 0.91      | 0.58        | 1.27      | 1.07        | 1.23        | 2.24      | 3.62        | 2.78      | 0.69      |
| 0.48      | 0.42      | 0.79      | 2.1         | 1.03      | 1.7         | 1           | 0.43      | 0.77        | 0.84      | 0.16      |
| 0.67      | 0.84      | 1.19      | 0.78        | 1.52      | 1.09        | 1.17        | 0.91      | 0.89        | 0.73      | 1.79      |
| 1.22      | 0.97      | 1.03      | 0.44        | 0.88      | 0.89        | 1.26        | 1.05      | 1.13        | 1.05      | 0.95      |
| 59.78     | 0.75      | 0.22      | 0.14        | 60.13     | 1.54        | 1.92        | 1.5       | 0.41        | 2.81      | 1.02      |
| 2.4       | 1.52      | 1.34      | 0.88        | 0.66      | 1.67        | 0.64        | 8.27      | 2.62        | 0.97      | 0.8       |
| 0.94      | 1.26      | 0.97      | 2.41        | 2.16      | 1.11        | 2.73        | 1.29      | 0.82        | 1.35      | 0.99      |
| 153.83    | 1.9       | 1.17      | 5.24        | 1.77      | 0.87        | 0.56        | 1.06      | 0.93        | 0.84      | 3.63      |
| 7.42      | 0.78      | 0.91      | 1.44        | 3.17      | 2.67        | 0.91        | 1.41      | 1.4         | 1.86      | 0.88      |
| 0.55      | 0.53      | 2.19      | 2.15        | 2.73      | 4.61        | 3           | 1.23      | 0.98        | 1         | 0.97      |
| 1.19      | 2.08      | 0.8       | 1.24        | 1.7       | 1.43        | 5.25        | 1.4       | 1.95        | 0.92      | 0.73      |
| 1.62      | 0.66      | 0.5       | 2.61        | 0.83      | 1.33        | 4.12        | 1.59      | 6.3         | 1.09      | 4.39      |
| 8.55      | 0.62      | 1.78      | 10.52       | 4.55      | 1.04        | 4.36        | 13.74     | 0.99        | 1.89      | 0.94      |
| 0.28      | 0.87      | 0.88      | 0.73        | 1.13      | 1.58        | 0.47        | 0.85      | 1.43        | 0.88      | 0.92      |
| 1.95      | 0.95      | 1.02      | 2.26        | 4.57      | 0.4         | 0.14        | 6.98      | 1.13        | 0.36      | 0.06      |
| 0.17      | 1.46      | 1.53      | 1.52        | 0.11      | 0.25        | 0.99        | 1.37      | 0.75        | 0.05      | 4.07      |
| 1.43      | 1.13      | 1.16      | 2.68        | 0.63      | 0.62        | 4.88        | 0.58      | 1.47        | 1.38      | 0.85      |
| 0.25      | 0.79      | 0.41      | 0.75        | 2.91      | 1.07        | 0.12        | 0.75      | 0.95        | 1.55      | 1.3       |
| 18.34     | 1         | 1.96      | 1.97        | 1.54      | 3.12        | 1.92        | 12.72     | 2.26        | 1.01      | 5.84      |
| 1.13      | 0.95      | 20.52     | 13.31       | 1.23      | 1.57        | 2.83        | 5.23      | 1.81        | 0.84      | 1.77      |
| 1.45      | 0.97      | 1.19      | 0.8         | 1.18      | 1.15        | 1.27        | 1.44      | 1.05        | 1.22      | 2.4       |

|      |      |       |       |       |      |       |       |      |      |      |
|------|------|-------|-------|-------|------|-------|-------|------|------|------|
| 0.73 | 0.97 | 1     | 1.39  | 3.01  | 0.7  | 1.2   | 0.71  | 1.8  | 0.65 | 1.5  |
| 0.56 | 0.94 | 3.2   | 0.59  | 0.43  | 2.09 | 0.1   | 11.65 | 0.94 | 3.05 | 0.15 |
| 1.19 | 0.92 | 0.96  | 0.94  | 5.77  | 1.28 | 2     | 0.73  | 1.18 | 1.13 | 1.16 |
| 0.33 | 0.38 | 0.62  | 0.95  | 1.45  | 0.43 | 0.29  | 0.75  | 0.72 | 0.76 | 2.26 |
| 2.12 | 0.9  | 4.27  | 0.72  | 16.17 | 0.04 | 0.42  | 0.5   | 8.69 | 1.02 | 0.65 |
| 2.38 | 0.53 | 13.96 | 36.8  | 7.59  | 1.26 | 1.83  | 4.89  | 3.44 | 0.67 | 4.2  |
| 1.15 | 0.37 | 1.58  | 1.41  | 1.75  | 2.28 | 0.91  | 0.34  | 1.13 | 0.77 | 1.96 |
| 0.79 | 0.59 | 1.01  | 0.41  | 0.78  | 1.23 | 0.37  | 0.8   | 1.12 | 0.72 | 2.29 |
| 1.14 | 1.41 | 0.79  | 5.02  | 3.18  | 1.6  | 1.16  | 1.36  | 2.37 | 0.44 | 0.96 |
| 0.4  | 3.89 | 1.24  | 0.04  | 0.17  | 1.76 | 37.5  | 6.44  | 1.98 | 1.23 | 0.03 |
| 3.34 | 0.71 | 1.38  | 0.32  | 1.1   | 0.58 | 1.5   | 0.23  | 1.3  | 3.08 | 0.83 |
| 2.55 | 4.87 | 1.13  | 1.47  | 0.58  | 0.93 | 0.93  | 0.95  | 0.92 | 1.05 | 1.18 |
| 2.41 | 0.77 | 0.97  | 0.97  | 0.93  | 1.25 | 2.29  | 1.03  | 1.51 | 1.79 | 1    |
| 0.92 | 1.67 | 1.89  | 1.24  | 5.62  | 1.94 | 0.62  | 0.88  | 0.84 | 2.59 | 0.92 |
| 1.68 | 0.85 | 0.72  | 0.9   | 1.44  | 1.26 | 1.93  | 0.7   | 1.33 | 1.37 | 0.95 |
| 1.04 | 1.45 | 0.99  | 0.75  | 1     | 1.37 | 12.97 | 1.75  | 1.92 | 2.45 | 5.09 |
| 0.13 | 0.99 | 1.07  | 1.46  | 1.4   | 0.99 | 1.09  | 0.75  | 0.77 | 1.21 | 1.08 |
| 0.59 | 1.44 | 0.9   | 0.91  | 5.15  | 1.1  | Inf   | 1.33  | 0.85 | 1.14 | 1.07 |
| 0.83 | 0.95 | 1.18  | 1.29  | 0.83  | 1    | 1.06  | 0.96  | 0.93 | 0.99 | 0.95 |
| 4.48 | 1.18 | 1.5   | 1.98  | 0.83  | 1.06 | 0.96  | 1.38  | 1.42 | 1.24 | 7.24 |
| 0.37 | 0.97 | 0.82  | 0.52  | 0.48  | 1.02 | 0.6   | 1.31  | 0.93 | 1.08 | 1.09 |
| 2.78 | 0.95 | 1.54  | 0.82  | 5.55  | 1.14 | 0.83  | 1.12  | 0.9  | 0.93 | 0.91 |
| 0.71 | 0.99 | 0.83  | 0.78  | 0.75  | 0.97 | 1.37  | 1.23  | 1    | 2.33 | 1.03 |
| 1.79 | 1.72 | 1.23  | 0.59  | 0.91  | 0.99 | 25.46 | 1.35  | 1.7  | 1.16 | 1.53 |
| 1.52 | 1.33 | 1.52  | 10.09 | 1.15  | 1.03 | NA    | 0.66  | 1.19 | 2.7  | 0.52 |
| 1.09 | 0.85 | 0.81  | 7.33  | 1.21  | 0.55 | 0     | 0.84  | 1.25 | 1.81 | 0.88 |
| 0.54 | 0.62 | 1.41  | 24.54 | 0.23  | 0.55 | 1.29  | 0.66  | 1.36 | 1.33 | 4.46 |
| 2.36 | 1.49 | 0.98  | 1.87  | 1.59  | 1.08 | 5.28  | 0.91  | 0.58 | 1.76 | 1.01 |
| 1.47 | 0.78 | 1.01  | 2.05  | 0.95  | 1.07 | 1     | 1.03  | 1.12 | 0.96 | 1.02 |
| 2    | 0.63 | 0.77  | 0.62  | 1.25  | 1.54 | 3.03  | 0.86  | 1.53 | 2.01 | 1.07 |
| 7.13 | 1.06 | 0.9   | 1.21  | 0.34  | 0.64 | 15.32 | 1.96  | 0.87 | 0.98 | 0.77 |
| 10   | 1.22 | 0.99  | 7.07  | 2.01  | 1.37 | 0.66  | 2.75  | 1    | 2.14 | 1.05 |
| 1.35 | 10.3 | 1.02  | 1.31  | 0.53  | 1.12 | 0.83  | 1.42  | 1.22 | 1.19 | 1.56 |

|       |      |      |      |       |      |       |      |      |       |      |
|-------|------|------|------|-------|------|-------|------|------|-------|------|
| 0.36  | 1.19 | 1.45 | 3.17 | 11.25 | 0.6  | 3.5   | 2.41 | 0.65 | 0.9   | 1.77 |
| 8.62  | 0.6  | 3.7  | 0.64 | 10.14 | 1.99 | Inf   | 1.08 | 1.29 | 1.88  | 0.79 |
| 1.77  | 0.97 | 1.03 | 1.42 | 1.1   | 0.9  | 4.89  | 1.27 | 0.77 | 1.47  | 2.72 |
| 1.45  | 1.8  | 1.25 | 1.82 | 2.26  | 1.09 | 8.18  | 2.26 | 2.64 | 10.11 | 3.78 |
| 3.79  | 1.06 | 0.93 | 1.22 | 1.16  | 1.05 | 2.78  | 1.12 | 0.99 | 0.86  | 9.16 |
| 1.22  | 1.17 | 1.04 | 0.82 | 3.38  | 0.5  | 2.6   | 2.63 | 1.92 | 0.72  | 0.78 |
| 4.62  | 0.45 | 0.75 | 1.34 | 0.66  | 0.65 | 0.71  | 1.21 | 1.35 | 1.73  | 1.08 |
| 1.39  | 0.81 | 5.81 | 3.12 | 0.68  | 0.78 | 0.6   | 1.05 | 0.68 | 1.6   | 0.56 |
| 0.27  | 0.78 | 0.78 | 0.86 | 1.42  | 0.38 | 1.21  | 1.03 | 1.05 | 0.52  | 1.05 |
| 0.82  | 1.29 | 0.52 | 1.29 | 1.22  | 0.88 | 1.05  | 1.88 | 1.23 | 0.86  | 1.67 |
| 2.01  | 2.3  | 2.37 | 3.74 | 1.04  | 0.68 | 12.12 | 1.25 | 0.97 | 1.38  | 1.38 |
| 0.79  | 2.62 | 1.49 | 4.5  | 0.72  | 1.06 | 0.38  | 0.64 | 1.64 | 1.23  | 1    |
| 0.88  | 1.33 | 1.17 | 11   | 1.19  | 0.86 | 1.28  | 2.2  | 0.83 | 1.11  | 2.58 |
| 2.66  | 3.14 | 1.19 | 2.53 | 2.85  | 1.88 | 0.9   | 1.53 | 1.78 | 1.08  | 3.32 |
| 1.1   | 1.17 | 1.03 | 1.57 | 0.12  | 0.79 | 1     | 0.46 | 1.43 | 0.6   | 0.6  |
| 0.3   | 1.62 | 0.53 | 0.03 | 0.01  | 1.7  | 0.61  | 0.75 | 0.88 | 2.64  | 0.09 |
| 0.92  | 0.62 | 0.85 | 7.15 | 3.04  | 1.84 | 0.5   | 0.91 | 0.92 | 1.27  | 0.96 |
| 0.2   | 0.77 | 0.9  | 0.67 | 1.37  | 4.16 | 15    | 0.36 | 1.89 | 11.08 | 0.76 |
| 1.05  | 1.01 | 1    | 0.64 | 1.25  | 0.56 | 1.45  | 0.9  | 1.01 | 0.85  | 1.49 |
| 2.01  | 0.91 | 2.12 | 2.48 | 1.35  | 1.78 | 30.56 | 3.69 | 3.15 | 4.47  | 1.8  |
| 4.91  | 1.21 | 5.79 | 0.85 | 1.87  | 4.28 | 0.83  | 2.94 | 0.93 | 8.72  | 1.89 |
| 0.88  | 1    | 0.94 | 2.89 | 1.19  | 0.78 | 0.62  | 0.28 | 1.21 | 1.31  | 1.27 |
| 0.96  | 1.17 | 1.23 | 3.44 | 1.71  | 1.18 | 0.12  | 5.42 | 0.89 | 1.55  | 0.56 |
| 11.36 | 0.59 | 1.3  | 0.79 | 1.87  | 1.83 | 0.55  | 0.53 | 2.26 | 1.16  | 0.94 |
| 1.44  | 1.02 | 1.09 | 0.51 | 1.25  | 2.25 | 0.6   | 1.19 | 1.18 | 1.14  | 1.06 |
| 0.91  | 1.08 | 0.9  | 1.13 | 0.41  | 0.95 | 0.7   | 1.05 | 1.74 | 0.69  | 0.64 |
| 0.92  | 0.87 | 1.24 | 0.9  | 0.94  | 0.79 | 1.06  | 1.34 | 1.06 | 0.97  | 3.6  |
| 1.63  | 1.22 | 1.82 | 3.65 | 0.4   | 0.86 | 1.12  | 0.7  | 0.76 | 0.28  | 1.02 |
| 0.8   | 1.39 | 0.99 | 3.06 | 0.76  | 1.04 | 0.82  | 1.27 | 1.24 | 1.18  | 1.01 |
| 1.12  | 0.83 | 0.71 | 1.98 | 1.2   | 0.98 | 2.94  | 0.84 | 0.84 | 1.03  | 0.68 |
| 0.83  | 0.84 | 1.31 | 0.73 | 1.21  | 1.1  | 0.63  | 0.99 | 1.05 | 1.21  | 3.08 |
| 0.55  | 0.96 | 1.32 | 1.23 | 1.36  | 1.2  | 2.15  | 0.58 | 1.09 | 0.51  | 1.02 |
| 3.72  | 1.03 | 1.11 | 2.07 | 1.74  | 1.26 | 1.97  | 2.62 | 1.39 | 2.39  | 0.1  |

|      |      |      |      |       |      |       |      |      |      |      |
|------|------|------|------|-------|------|-------|------|------|------|------|
| 3.91 | 0.81 | 2.77 | 0.66 | 1.46  | 1.06 | 1.64  | 2.1  | 1.62 | 0.48 | 1.22 |
| 1.75 | 0.83 | 0.84 | 1.15 | 1.48  | 0.54 | 0.95  | 0.37 | 1.25 | 3.89 | 1.08 |
| 2.62 | 1.19 | 1.07 | 6.03 | 2.27  | 0.83 | 0.57  | 0.18 | 1.16 | 0.94 | 0.82 |
| 1.11 | 0.88 | 0.78 | 0.43 | 2.86  | 1.44 | 1.08  | 1.63 | 0.48 | 0.18 | 1.28 |
| 0.99 | 2.62 | 0.64 | 0.93 | 1.26  | 0.46 | 1.1   | 2.71 | 1.45 | 0.91 | 0.53 |
| 1.86 | 8.1  | 1.62 | 3.27 | 3.17  | 0.83 | 0.32  | 3.08 | 1    | 0.96 | 0.43 |
| 1    | 0.9  | 1.27 | 1.67 | 0.53  | 0.99 | 2.08  | 1.51 | 1.89 | 1.55 | 1.83 |
| 3.9  | 1.53 | 1.21 | 0.7  | 3.89  | 1.03 | 2.22  | 1.06 | 0.82 | 1.69 | 0.8  |
| 3.65 | 1.89 | 0.61 | 1.23 | 0.44  | 1.33 | 0.71  | 1.19 | 1.38 | 1.32 | 0.68 |
| 1.21 | 1.02 | 0.95 | 0.91 | 1.52  | 2.15 | 2.09  | 0.2  | 1.36 | 1.34 | 0.9  |
| 1.63 | 0.9  | 1.38 | 3.15 | 1.76  | 1.19 | 1.08  | 1.14 | 0.95 | 1.29 | 2.11 |
| 1.75 | 0.88 | 1    | 2.75 | 1.72  | 1.04 | 0.91  | 1.11 | 1.31 | 1.49 | 0.86 |
| 1.54 | 0.89 | 1.17 | 3.04 | 0.79  | 1.97 | Inf   | 0.98 | 1.25 | 0.79 | 1.42 |
| 0.56 | 0.74 | 0.76 | 1.32 | 0.72  | 0.56 | 0.58  | 0.88 | 0.79 | 1.25 | 1.09 |
| 0.9  | 0.93 | 0.98 | 1.74 | 0.48  | 1.46 | 1.03  | 0.74 | 0.73 | 1.05 | 0.58 |
| 1.01 | 1.11 | 0.82 | 4.18 | 1.68  | 1.74 | 25.98 | 1.08 | 1.08 | 1.22 | 3.19 |
| 1.63 | 1.27 | 0.81 | 0.24 | 0.91  | 0.77 | 0.79  | 1.07 | 0.75 | 0.5  | 1.99 |
| 1.26 | 1.67 | 1.46 | 3.88 | 2.53  | 1.11 | 1.32  | 3.29 | 2.44 | 6.63 | 3.63 |
| 2.12 | 1.3  | 0.94 | 1.05 | 1.48  | 0.7  | 7.68  | 1.13 | 1.34 | 1.91 | 0.5  |
| 2.83 | 0.6  | 1.97 | 0.72 | 0.45  | 0.77 | 0.5   | 2.08 | 0.58 | 1.32 | 1.24 |
| 1.3  | 1.6  | 0.87 | 35.5 | 2.19  | 0.74 | 1.31  | 1.75 | 0.88 | 0.73 | 0.78 |
| 11.1 | 0.88 | 0.7  | 0.6  | 3.25  | 0.7  | 1.03  | 2.02 | 1.81 | 1.32 | 0.64 |
| 1.17 | 0.96 | 1    | 0.62 | 1.97  | 1.52 | 0.87  | 0.95 | 0.88 | 1.2  | 1.18 |
| 0.33 | 0.29 | 0.81 | 1.96 | 0.16  | 2.29 | 0.9   | 0.93 | 1.44 | 1.6  | 0.95 |
| 0.99 | 0.79 | 1.07 | 1.42 | 1.87  | 1.51 | 1.01  | 1.2  | 0.44 | 0.45 | 1.12 |
| 0.46 | 1.39 | 1.22 | 0.64 | 0.78  | 0.99 | NA    | 1.84 | 0.91 | 1.1  | 1.07 |
| 0.08 | 1.1  | 1.28 | 1.03 | 0.49  | 1.17 | 0.97  | 1    | 0.91 | 1.08 | 0.96 |
| 2.54 | 0.74 | 1.22 | 1.93 | 1.06  | 1.04 | 1.94  | 1.01 | 1.21 | 0.33 | 1.59 |
| 0.66 | 1.38 | 1.42 | 2.45 | 3.62  | 0.47 | 1.24  | 0.58 | 0.72 | 0.42 | 1.21 |
| 0.92 | 0.85 | 0.92 | 3.33 | 1.49  | 0.96 | 0.91  | 2.21 | 0.98 | 0.98 | 1.09 |
| 0.68 | 1.04 | 1.05 | 3.01 | 0.6   | 0.56 | 1.15  | 3.11 | 0.91 | 0.45 | 1.13 |
| 8.62 | 0.6  | 3.7  | 0.64 | 10.14 | 1.99 | Inf   | 1.08 | 1.29 | 1.88 | 0.79 |
| 1.27 | 1.43 | 1.15 | 1.44 | 1.54  | 1.68 | 0.91  | 1.24 | 1.34 | 0.71 | 0.87 |

|       |      |      |      |      |      |       |      |      |      |      |
|-------|------|------|------|------|------|-------|------|------|------|------|
| 1.73  | 1.24 | 0.91 | 0.66 | 0.98 | 0.61 | 0.87  | 2.06 | 1.79 | 2.24 | 0.77 |
| 0.6   | 0.9  | 0.95 | 1.44 | 0.74 | 1.42 | 0.85  | 0.91 | 0.69 | 0.75 | 1.26 |
| 0.95  | 0.97 | 1.1  | 0.6  | 4.66 | 0.99 | 2.42  | 0.77 | 0.99 | 1.01 | 2.26 |
| 0.72  | 1.21 | 0.8  | 3.56 | 0.68 | 1.04 | 1.22  | 0.89 | 1.43 | 0.76 | 0.95 |
| 1.33  | 0.87 | 0.84 | 1.85 | 1.23 | 2.76 | Inf   | 1.22 | 1.04 | 0.89 | 1.95 |
| 0.12  | 1.03 | 0.99 | 0.82 | 0.44 | 0.94 | 0.12  | 0.91 | 1.08 | 0.93 | 1.11 |
| 0.79  | 0.96 | 0.86 | 0.97 | 4.08 | 1.51 | 0.55  | 1.18 | 0.93 | 0.9  | 0.92 |
| 0.93  | 0.94 | 0.96 | 1.1  | 3.47 | 1.37 | 1.52  | 1.08 | 0.68 | 1.2  | 0.95 |
| 13.98 | 0.65 | 0.78 | 0.22 | 1.2  | 1    | 0.59  | 1.04 | 1.44 | 1.19 | 1.95 |
| 0.75  | 0.91 | 0.75 | 1.63 | 0.71 | 1.09 | 1.22  | 1.81 | 1.07 | 1.24 | 2.08 |
| 0.94  | 1.07 | 0.61 | 3.55 | 1.51 | 1.28 | 1.58  | 2.11 | 2.58 | 0.5  | 2.27 |
| 3.01  | 0.79 | 0.97 | 0.93 | 0.62 | 0.83 | 3.33  | 4.59 | 1.21 | 1.33 | 0.87 |
| 1.77  | 2.1  | 1.47 | 1.79 | 1.59 | 1.63 | 5.54  | 2.59 | 3.21 | 7.38 | 3.38 |
| 1.25  | 0.7  | 0.91 | 0.49 | 0.71 | 1.19 | 0.53  | 0.73 | 0.8  | 0.74 | 0.76 |
| 0.2   | 2.71 | 0.86 | 1.35 | 2.04 | 1.26 | 17.69 | 1.03 | 1.3  | 0.71 | 0.78 |
| 1.19  | 0.99 | 1.27 | 0.71 | 0.66 | 0.82 | 0.37  | 4.71 | 0.9  | 0.66 | 0.78 |
| 1.13  | 0.84 | 1.15 | 5.44 | 5.77 | 1.31 | 2.25  | 0.55 | 1.06 | 1.02 | 1.02 |
| 0.89  | 0.7  | 1.29 | 1.33 | 1.31 | 1.01 | 7.13  | 1.33 | 1.13 | 0.72 | 0.79 |
| 0.8   | 0.98 | 0.97 | 0.97 | 2.44 | 0.92 | Inf   | 1.11 | 0.71 | 0.66 | 1.44 |
| 1.11  | 1.01 | 0.87 | 0.4  | 0.73 | 0.95 | 1.85  | 0.42 | 0.86 | 1.34 | 1.07 |
| 0.83  | 0.92 | 0.87 | 2.8  | 0.63 | 1.01 | 0.99  | 1.32 | 1.36 | 1.36 | 1.1  |
| 1.16  | 1.19 | 1.72 | 2.32 | 3.13 | 0.65 | 1.25  | 2.14 | 2.07 | 1.73 | 1.04 |
| 0.98  | 0.95 | 0.95 | 0.74 | 0.76 | 1.35 | 5.14  | 1.67 | 1.41 | 1.04 | 1.47 |
| 1.1   | 0.98 | 1.04 | 0.95 | 1.6  | 1.38 | 1.09  | 2.59 | 0.92 | 3.04 | 0.37 |
| 2.43  | 1.46 | 0.75 | 0.56 | 0.9  | 0.68 | 1.48  | 1    | 1.05 | 0.92 | 2.85 |
| 0.79  | 0.66 | 0.99 | 1.61 | 2.2  | 0.84 | 0.98  | 0.8  | 5.06 | 0.79 | 1.19 |
| 0.85  | 1.32 | 1.23 | 0.68 | 1.46 | 1.07 | 6.11  | 1.29 | 0.97 | 1.22 | 1.83 |
| 1.29  | 1.02 | 0.85 | 1.08 | 4.8  | 1.01 | 0.87  | 1.87 | 1.04 | 1.06 | 0.86 |
| 1.38  | 1.06 | 0.95 | 2.81 | 1.01 | 1.09 | 10.21 | 1.13 | 1.09 | 1.11 | 0.72 |
| 1     | 0.78 | 0.97 | 0.95 | 0.98 | 0.79 | 0.14  | 0.77 | 1.1  | 0.82 | 4.5  |
| 1.07  | 0.93 | 1.01 | 0.94 | 0.7  | 1.16 | 2.51  | 0.87 | 1.29 | 0.74 | 1.25 |
| 2.25  | 2.4  | 1.06 | 0.73 | 2.52 | 1.1  | NA    | 2.05 | 1.05 | 0.89 | 1.08 |
| 1.03  | 0.96 | 1.12 | 1.54 | 1.07 | 0.97 | NA    | 0.64 | 0.91 | 1.08 | 1.26 |

|      |      |      |      |      |      |       |      |      |      |       |
|------|------|------|------|------|------|-------|------|------|------|-------|
| 0.79 | 1.21 | 1.34 | 0.25 | 3.06 | 0.68 | 1.37  | 0.36 | 0.7  | 0.6  | 1.07  |
| 1.15 | 1.22 | 1.11 | 0.77 | 0.72 | 1.1  | 0.83  | 1.01 | 1.13 | 1.07 | 1.15  |
| 0.87 | 1    | 1.09 | 0.84 | 1.1  | 0.98 | 1.43  | 2.83 | 1.03 | 1.15 | 1.78  |
| 1.81 | 1.71 | 0.74 | 1.92 | 0.39 | 1.32 | 3.29  | 0.61 | 1.23 | 0.95 | 1.5   |
| 0.51 | 1.09 | 0.67 | 0.66 | 0.55 | 9.53 | 0.95  | 0.89 | 1.17 | 1.59 | 0.78  |
| 0.94 | 0.98 | 1.01 | 1.29 | 1.25 | 1.01 | 1     | 1.28 | 1.06 | 0.89 | 1.23  |
| 0.78 | 1.07 | 1.01 | 1.14 | 3.3  | 0.7  | 1.69  | 0.71 | 1.71 | 0.68 | 1.46  |
| 0.83 | 0.61 | 0.69 | 1.55 | 0.86 | 0.98 | 0.89  | 1.02 | 1.4  | 0.98 | 0.91  |
| 2.1  | 1.47 | 0.93 | 1.93 | 0.92 | 1.15 | 5.43  | 0.92 | 0.74 | 1.68 | 0.58  |
| 0.97 | 1.04 | 0.97 | 1.62 | 2.75 | 1    | 0.48  | 0.57 | 1.71 | 0.68 | 1.79  |
| 0.91 | 1.36 | 0.97 | 0.64 | 1.14 | 0.88 | 1.63  | 1.27 | 0.61 | 1.13 | 0.59  |
| 3.64 | 1    | 1.31 | 1    | 1.23 | 0.82 | 5.67  | 1.34 | 0.7  | 1.18 | 0.74  |
| 2.1  | 0.67 | 0.69 | 0.65 | 0.43 | 0.97 | 0.88  | 0.81 | 1.15 | 1.1  | 4.46  |
| 1.37 | 0.95 | 0.97 | 2.47 | 3.57 | 0.23 | 0.9   | 0.97 | 1.34 | 5.25 | 0.82  |
| 0.99 | 1.16 | 0.86 | 4.94 | 0.84 | 0.94 | 0.98  | 0.75 | 1.37 | 0.67 | 0.74  |
| 1.1  | 1.17 | 1.24 | 1.13 | 0.83 | 1.02 | 0.95  | 0.97 | 2.16 | 1.27 | 1.22  |
| 1.22 | 1.21 | 1.15 | 1.51 | 2.7  | 0.99 | 0.89  | 2.31 | 0.89 | 1.28 | 1.62  |
| 0.93 | 1.1  | 0.81 | 1.15 | 0.77 | 1.24 | 0.91  | 0.95 | 0.93 | 0.68 | 0.68  |
| 0.59 | 1.22 | 0.64 | 1.09 | 1.85 | 0.98 | 0.57  | 1.17 | 0.98 | 0.89 | 1.1   |
| 1.38 | 1.38 | 0.82 | 0.98 | 0.28 | 0.79 | 0.41  | 1.91 | 1.23 | 1.45 | 1.64  |
| 0.54 | 1    | 0.87 | 1.05 | 0.83 | 0.66 | 0.71  | 1.55 | 0.87 | 0.52 | 1.21  |
| 0.79 | 0.57 | 1.31 | 3.18 | 1.13 | 1.85 | 0.32  | 0.63 | 1.1  | 2.03 | 11.76 |
| 0.58 | 1.13 | 1.04 | 0.75 | 2.53 | 0.56 | 0.84  | 2.74 | 1.36 | 1    | 1.65  |
| 0.5  | 0.84 | 0.77 | 0.73 | 1.37 | 1.45 | 1.26  | 0.56 | 0.64 | 0.48 | 0.99  |
| 0.89 | 1.1  | 1.04 | 0.66 | 0.62 | 1.18 | 0.95  | 1.23 | 0.49 | 1.34 | 1.5   |
| 0.78 | 1.32 | 0.83 | 4.42 | 0.3  | 1.76 | 34.44 | 0.17 | 0.82 | 1.85 | 1.88  |
| 2.83 | 0.89 | 0.87 | 2.12 | 1.09 | 1.38 | 1.1   | 1.94 | 1.25 | 1.09 | 1.04  |
| 1.3  | 0.98 | 1.18 | 0.96 | 0.72 | 0.85 | 2.02  | 0.92 | 1.74 | 1.39 | 1.32  |
| 1.11 | 1.01 | 1.02 | 0.74 | 0.86 | 1.12 | NA    | 2.05 | 0.95 | 0.99 | 0.82  |
| 4.45 | 1.24 | 0.97 | 0.48 | 0.62 | 0.72 | 1.24  | 0.94 | 1.11 | 1.25 | 1.26  |
| 4.17 | 0.4  | 1.8  | 2.86 | 1.71 | 1.39 | 0.65  | 0.66 | 0.96 | 0.7  | 1.13  |
| 0.89 | 1.04 | 0.97 | 1.06 | 1.04 | 0.77 | 0.64  | 1.31 | 0.74 | 1.08 | 1     |
| 4.71 | 0.71 | 0.93 | 7.1  | 0.71 | 0.95 | 1.5   | 1.62 | 0.88 | 2.66 | 0.26  |



|       |      |      |      |      |      |      |      |      |      |      |
|-------|------|------|------|------|------|------|------|------|------|------|
| 1.21  | 1    | 1.53 | 0.14 | 3.33 | 1.15 | 2.5  | 0.89 | 0.68 | 1.23 | 1.05 |
| 0.62  | 0.6  | 1.15 | 2.16 | 1.92 | 0.53 | 1    | 3.21 | 1.18 | 1.03 | 0.72 |
| 0.75  | 1.48 | 1.01 | 0.6  | 1.24 | 0.28 | 1.07 | 1.72 | 1.63 | 1.24 | 0.96 |
| 0.69  | 1.09 | 0.43 | 0.87 | 0.55 | 1.12 | 0.9  | 0.6  | 0.83 | 0.51 | 0.58 |
| 1.21  | 0.71 | 0.93 | 0.92 | 2.49 | 0.83 | 5.7  | 1.37 | 1.34 | 0.8  | 0.97 |
| 0.68  | 1.46 | 0.77 | 1.06 | 2.13 | 1.57 | 0.11 | 0.79 | 1.02 | 1    | 1.24 |
| 0.7   | 1.27 | 0.81 | 0.47 | 1.08 | 1.18 | 1.77 | 1.69 | 0.91 | 0.84 | 0.61 |
| 7.58  | 1.14 | 1.28 | 0.2  | 1.57 | 0.88 | 1.13 | 0.75 | 2.12 | 0.62 | 0.65 |
| 1     | 1.06 | 0.89 | 0.76 | 2.05 | 1.17 | 1.5  | 0.54 | 0.68 | 0.92 | 1.25 |
| 1.14  | 1.86 | 0.67 | 0.95 | 0.58 | 1.49 | 2.29 | 0.79 | 1.09 | 1.46 | 3.01 |
| 0.56  | 1.13 | 0.99 | 1.48 | 1.02 | 1.56 | 0.9  | 0.77 | 1.46 | 0.8  | 0.82 |
| 2.75  | 1.17 | 0.85 | 1.31 | 1.76 | 1.33 | 0.42 | 1.91 | 0.93 | 0.9  | 0.54 |
| 0.76  | 1.2  | 1.32 | 1    | 0.46 | 1.38 | 1    | 1.47 | 0.78 | 1.21 | 0.81 |
| 0.97  | 1.05 | 0.75 | 2.3  | 0.6  | 0.69 | 1.68 | 0.99 | 1.19 | 1.38 | 1.11 |
| 0.09  | 1.18 | 0.84 | 2.87 | 0.67 | 0.83 | 0.86 | 4    | 1.33 | 1.17 | 1.19 |
| 1.1   | 1.06 | 0.62 | 0.7  | 1.37 | 0.64 | Inf  | 0.3  | 1.08 | 3.41 | 0.76 |
| 1.52  | 1.07 | 0.79 | 2.32 | 1.59 | 0.95 | 1.45 | 1.38 | 1.39 | 1.07 | 0.44 |
| 0.93  | 0.76 | 0.95 | 6.44 | 1.25 | 1.33 | 0.5  | 2.03 | 0.92 | 1.21 | 1.12 |
| 16.67 | 2.77 | 1.32 | 0.9  | 0.65 | 0.72 | 0.64 | 0.54 | 3.01 | 1.36 | 0.57 |
| 5.25  | 3.01 | 0.56 | 0    | 0.26 | 5.47 | 1.44 | 4.93 | 1.22 | 0.44 | 0.08 |
| 1.84  | 1.62 | 1.24 | 1.21 | 1.8  | 1.37 | 2.36 | 1.35 | 1.54 | 1.09 | 1.33 |
| 0.82  | 0.95 | 0.98 | 1.63 | 2.73 | 0.85 | 0.6  | 0.64 | 1.8  | 0.65 | 1.66 |
| 0.27  | 1.01 | 1.04 | 0.48 | 1.12 | 0.29 | 0.64 | 9.48 | 1.72 | 1.61 | 1.99 |
| 0.45  | 0.87 | 0.88 | 1.53 | 0.93 | 0.75 | 0.47 | 8.38 | 1.08 | 0.99 | 2.3  |
| 1.65  | 1.22 | 0.97 | 1.74 | 0.68 | 0.95 | 1.23 | 1.24 | 1.16 | 1.86 | 0.63 |
| 2.82  | 0.92 | 0.98 | 1.93 | 1.72 | 0.8  | 0.53 | 2.58 | 0.75 | 0.65 | 0.81 |
| 0.71  | 0.94 | 1.22 | 1.39 | 0.57 | 1.62 | 1.23 | 0.6  | 1.58 | 0.44 | 0.85 |
| 0.55  | 1.38 | 1.26 | 0.39 | 2.04 | 0.42 | 1.09 | 1.34 | 1.29 | 0.72 | 0.13 |
| 0.56  | 1.02 | 0.76 | 1.97 | 1.02 | 0.87 | 0.84 | 0.8  | 0.62 | 0.95 | 1.4  |
| 0.58  | 0.16 | 0.57 | 0.53 | 1.16 | 3.41 | 2.5  | 0.5  | 0.61 | 1.09 | 1    |
| 0.41  | 1.13 | 1.15 | 0.56 | 2.7  | 1.75 | 0.97 | 1.4  | 0.81 | 9    | 0.1  |
| 0.48  | 5.55 | 0.79 | 4.32 | 1.17 | 1.73 | 1.22 | 2.69 | 1.09 | 1.18 | 0.92 |
| 8.39  | 0.44 | 6.97 | 0.53 | 4.52 | 2.74 | 0.83 | 1.37 | 1.21 | 4.51 | 1.67 |

|       |      |      |      |      |      |       |      |      |      |      |
|-------|------|------|------|------|------|-------|------|------|------|------|
| 0.35  | 1.16 | 0.42 | 1.17 | 1.52 | 1.05 | 0.87  | 0.64 | 0.67 | 0.97 | 0.78 |
| 0.73  | 1.04 | 1.18 | 0.41 | 0.69 | 1.14 | 1.13  | 2.57 | 1.13 | 1.39 | 1.03 |
| 0.51  | 0.53 | 1.43 | 1.02 | 0.37 | 1.54 | 6.73  | 0.58 | 3.57 | 0.58 | 2.03 |
| 0.94  | 0.94 | 1.05 | 0.43 | 0.62 | 0.37 | 0.74  | 0.12 | 1.01 | 0.96 | 0.7  |
| 1.21  | 1.16 | 0.79 | 3.16 | 1.02 | 1.81 | 0.34  | 0.23 | 1.27 | 0.99 | 8.84 |
| 0.92  | 0.92 | 1.16 | 1.01 | 1.03 | 1.09 | 0.7   | 0.34 | 1.06 | 1.95 | 6.22 |
| 3.11  | 0.99 | 1.35 | 1.31 | 1.15 | 1.1  | 3.6   | 3.08 | 0.33 | 1.82 | 0.88 |
| 1.36  | 1.02 | 1.06 | 1.91 | 1.02 | 0.76 | 0.94  | 3.56 | 1.31 | 0.3  | 1.25 |
| 2.94  | 1.22 | 1.15 | 1.4  | 0.86 | 0.94 | 14.56 | 2.6  | 0.67 | 2.12 | 0.3  |
| 6.02  | 1.7  | 1.11 | 4.4  | 0.83 | 1.02 | Inf   | 1.46 | 1.04 | 1.7  | 2.45 |
| 4.88  | 0.95 | 1.21 | 0.52 | 0.73 | 0.74 | 0.84  | 1.38 | 0.99 | 0.71 | 0.97 |
| 17.38 | 0.69 | 0.48 | 0.52 | 0.8  | 4.66 | 7.09  | 1    | 3.14 | 6.46 | 2.45 |
| 1.23  | 1    | 1.61 | 1.16 | 1.54 | 2    | 0.95  | 1.34 | 0.81 | 1.32 | 1.15 |
| 1.5   | 1.62 | 1    | 1.14 | 0.65 | 0.43 | 2.6   | 0.93 | 0.65 | 1.5  | 0.93 |

| 219195_at | 221530_s_at | 91816_f_at | 204908_s_at | 202326_at |
|-----------|-------------|------------|-------------|-----------|
| 5.28      | 5.23        | 1.07       | 1.1         | 1.03      |
| 1.39      | 0.73        | 0.74       | 1.56        | 1.05      |
| 1         | 0.51        | 1.4        | 0.55        | 1.23      |
| 4.86      | 2.7         | 0.75       | 0.83        | 1.18      |
| 1.92      | 1.78        | 0.94       | 0.96        | 0.83      |
| 2.15      | 0.99        | 2.45       | 1.08        | 1.59      |
| 0.29      | 0.09        | 0.52       | 1.12        | 4         |
| 2.36      | 0.88        | 2.11       | 1.29        | 0.92      |
| 0.93      | 0.6         | 0.7        | 1.14        | 0.74      |
| 8.72      | 0.41        | 1.03       | 1.32        | 0.45      |
| 1.52      | 3.75        | 0.63       | 1.2         | 1.01      |
| 1.26      | 0.66        | 1.33       | 1.09        | 1.14      |
| 1.5       | 1.12        | 1.96       | 0.73        | 0.88      |
| 30.01     | 23.73       | 0.27       | 0.95        | 0.11      |
| 2.91      | 0.85        | 1.03       | 0.81        | 1.98      |
| 3.93      | 0.84        | 1.04       | 0.75        | 0.99      |
| 0.12      | 0.97        | 0.96       | 1.02        | 1.32      |
| 0.54      | 1.08        | 1.15       | 1.63        | 1.29      |
| 0.67      | 1.37        | 1.15       | 1.19        | 1.97      |
| 1.19      | 5.92        | 1.15       | 0.8         | 0.26      |
| 0.36      | 1.98        | 1.41       | 1.39        | 7.62      |
| 15.33     | 60.47       | 0.4        | 2.48        | 1.77      |
| 5.78      | 7.45        | 0.64       | 1.12        | 1.14      |
| 0.5       | 3.99        | 0.7        | 1.34        | 1.42      |
| 0.06      | 0.09        | 0.44       | 1.97        | 1.25      |
| 0.19      | 1.99        | 0.81       | 0.67        | 1.06      |
| 0.57      | 1.53        | 0.76       | 1.35        | 1.05      |
| 1.51      | 2.92        | 0.77       | 2.67        | 1.25      |
| 1.08      | 215.82      | 1.25       | 1.62        | 0.82      |
| 0.97      | 0.8         | 1.1        | 0.95        | 0.79      |

|       |       |      |      |      |
|-------|-------|------|------|------|
| 5.58  | 0.75  | 0.81 | 0.91 | 0.71 |
| 29.66 | 0.6   | 2.3  | 2.56 | 0.85 |
| 0.97  | 1.37  | 1.08 | 0.89 | 0.96 |
| 2.16  | 0.53  | 1.39 | 0.54 | 0.73 |
| 1.5   | 2.83  | 9.64 | 0.56 | 1.04 |
| 0.67  | 0.65  | 0.79 | 5.08 | 1.18 |
| 20.97 | 15.87 | 0.48 | 0.91 | 1.72 |
| 0.07  | 0.58  | 1.01 | 1.05 | 1.17 |
| 0.83  | 0.31  | 0.96 | 2.82 | 1    |
| 0.53  | 17.29 | 1.34 | 2.02 | 0.86 |
| 1.75  | 2.8   | 0.77 | 2.05 | 1.22 |
| 1.59  | 0.36  | 1.17 | 0.58 | 1.14 |
| 0.42  | 3.14  | 0.79 | 0.77 | 0.35 |
| 1.4   | 1.55  | 1.4  | 1.39 | 0.23 |
| 0.56  | 2.67  | 0.73 | 0.78 | 0.5  |
| 21.09 | 2.75  | 1.14 | 1.45 | 0.94 |
| 2.33  | 1.23  | 1.31 | 0.48 | 1.27 |
| 4.56  | 1.19  | 1.01 | 1.06 | 1.93 |
| 1.17  | 1.05  | 0.99 | 1.13 | 0.88 |
| 3.49  | 0.58  | 1.28 | 1.78 | 0.73 |
| 3.5   | 1.17  | 0.98 | 0.97 | 0.91 |
| 0.22  | 0.86  | 0.7  | 0.64 | 1.13 |
| 0.51  | 0.39  | 1.02 | 0.46 | 1.13 |
| 1.47  | 1.14  | 1.25 | 1.02 | 1.35 |
| 1.06  | 5.03  | 0.91 | 0.79 | 0.53 |
| 0.12  | 0.8   | 1.28 | 0.92 | 1.03 |
| 0.2   | 0.33  | 1.45 | 2.88 | 0.98 |
| 2.37  | 2.82  | 0.56 | 1.44 | 1.33 |
| 1.49  | 1.61  | 0.81 | 1.08 | 0.86 |
| 0.27  | 5.79  | 0.54 | 1.18 | 0.33 |
| 0.61  | 0.86  | 0.95 | 2.08 | 0.72 |
| 1.38  | 1.85  | 2.28 | 0.68 | 0.88 |
| 0.81  | 2.34  | 0.69 | 2.17 | 1.01 |

|       |       |      |      |      |
|-------|-------|------|------|------|
| 0.25  | 3.25  | 1.25 | 1.47 | 0.73 |
| 4.71  | 11.91 | 1.11 | 1.16 | 1.16 |
| 2.8   | 42.4  | 1.1  | 1.21 | 1.26 |
| 1.42  | 4.24  | 0.96 | 1.67 | 1.27 |
| 4.7   | 1.13  | 0.98 | 0.7  | 0.69 |
| 0.65  | 0.56  | 1.34 | 0.72 | 1.3  |
| 2.83  | 0.53  | 1.07 | 1.35 | 1.82 |
| 0.64  | 0.57  | 1.29 | 1.68 | 1.96 |
| 1.19  | 2.21  | 2.11 | 1.78 | 1.37 |
| 0.52  | 4.86  | 1.75 | 1.05 | 0.62 |
| 5.73  | 0.5   | 1.86 | 1.17 | 1.36 |
| 0.1   | 4.86  | 0.75 | 1.53 | 2.18 |
| 0.97  | 0.73  | 0.83 | 1.4  | 0.61 |
| 1.23  | 1.39  | 0.66 | 1.59 | 1.41 |
| 0.17  | 2.75  | 1.34 | 0.72 | 1.38 |
| 1.4   | 0.16  | 0.79 | 1.62 | 0.09 |
| 1.89  | 3.77  | 0.78 | 5.1  | 0.74 |
| 4.88  | 1.24  | 2.52 | 0.36 | 1.02 |
| 1.54  | 3.2   | 1.01 | 1.05 | 0.84 |
| 3.51  | 1.52  | 3.11 | 2.48 | 5    |
| 2.21  | 16.5  | 3.3  | 2.56 | 0.45 |
| 3.34  | 0.59  | 0.91 | 1.48 | 1.02 |
| 0.17  | 0.3   | 0.46 | 1.05 | 5.38 |
| 1.15  | 0.78  | 1.37 | 2.25 | 2.27 |
| 6.37  | 0.54  | 1.31 | 0.97 | 0.95 |
| 1.4   | 0.64  | 0.7  | 1.42 | 0.76 |
| 0.76  | 0.91  | 1.01 | 0.93 | 1.37 |
| 16.98 | 4.05  | 0.89 | 2.68 | 0.93 |
| 1.16  | 1.96  | 0.83 | 0.86 | 0.83 |
| 3.73  | 0.8   | 0.91 | 0.96 | 1.06 |
| 0.8   | 1.01  | 1.26 | 1.24 | 1.06 |
| 3.11  | 5.07  | 0.41 | 0.47 | 0.62 |
| 7.15  | 3.09  | 0.78 | 2.23 | 0.73 |

|       |       |      |      |      |
|-------|-------|------|------|------|
| 2.09  | 0.7   | 0.76 | 0.24 | 1.53 |
| 1.57  | 3.06  | 0.83 | 0.89 | 1.02 |
| 0.99  | 0.89  | 1.18 | 1.2  | 1.03 |
| 1.9   | 8.79  | 1.87 | 1.06 | 1.27 |
| 10.09 | 0.94  | 1.11 | 0.68 | 0.89 |
| 1.58  | 0.23  | 0.35 | 0.59 | 0.66 |
| 1.53  | 3.65  | 0.77 | 1.74 | 0.92 |
| 0.89  | 6.05  | 0.69 | 1.38 | 0.57 |
| 3.25  | 1.58  | 0.77 | 0.91 | 0.77 |
| 0.81  | 0.58  | 1.17 | 1    | 0.9  |
| 0.76  | 0.85  | 0.96 | 1.18 | 1.61 |
| 1.78  | 1.98  | 0.99 | 1.32 | 0.92 |
| 0.9   | 1.32  | 0.87 | 1.09 | 0.76 |
| 1.26  | 0.56  | 1.34 | 0.95 | 1.19 |
| 1.08  | 2.59  | 0.94 | 2.18 | 0.9  |
| 1.14  | 17    | 1.42 | 0.84 | 1.07 |
| 1.14  | 2.75  | 1.08 | 1.68 | 0.87 |
| 1.27  | 2.96  | 1.06 | 2.19 | 1.31 |
| 7.4   | 0.81  | 1.04 | 2.18 | 1.07 |
| 3.83  | 1.35  | 0.93 | 0.57 | 1.13 |
| 0.92  | 0.98  | 1.06 | 0.68 | 0.99 |
| 1.58  | 1.23  | 0.94 | 0.45 | 0.89 |
| 0.92  | 0.74  | 1.08 | 1.09 | 1.06 |
| 1.24  | 0.04  | 1.04 | 1.29 | 1.54 |
| 1.7   | 0.86  | 1.08 | 1.85 | 1.32 |
| 2.36  | 2.79  | 0.83 | 0.92 | 0.72 |
| 0.15  | 0.51  | 1.04 | 0.98 | 0.98 |
| 1.93  | 1.31  | 1.15 | 2.09 | 1.05 |
| 0.9   | 0.23  | 0.93 | 0.45 | 0.88 |
| 1.49  | 1.11  | 0.98 | 1.08 | 0.8  |
| 0.72  | 2.57  | 0.95 | 3.64 | 1.04 |
| 4.71  | 11.91 | 1.11 | 1.16 | 1.16 |
| 1.44  | 0.9   | 0.96 | 1.27 | 1.04 |

|       |       |      |      |      |
|-------|-------|------|------|------|
| 4.25  | 1.38  | 1.39 | 0.6  | 1.04 |
| 0.98  | 6.91  | 1.56 | 1.4  | 1.12 |
| 1.58  | 0.3   | 1.16 | 0.89 | 0.71 |
| 1.52  | 1.05  | 0.88 | 6.11 | 0.89 |
| 1.25  | 0.79  | 0.87 | 0.7  | 0.88 |
| 2     | 1.07  | 1.06 | 0.99 | 1.35 |
| 0.98  | 0.5   | 1.06 | 1.25 | 0.76 |
| 4.47  | 0.97  | 0.81 | 1.27 | 0.68 |
| 1.46  | 1.18  | 0.97 | 0.74 | 1.07 |
| 21.73 | 4.92  | 1.02 | 1.31 | 1.36 |
| 1.07  | 1.1   | 0.88 | 1.15 | 0.86 |
| 2.07  | 0.61  | 0.84 | 1.08 | 0.85 |
| 1.59  | 2.39  | 0.96 | 2.2  | 1.26 |
| 3.68  | 0.45  | 0.68 | 1.93 | 0.98 |
| 3.14  | 16.95 | 4.55 | 3.06 | 0.2  |
| 0.84  | 0.94  | 1.3  | 1.35 | 1.04 |
| 1.23  | 2.11  | 0.95 | 0.7  | 0.79 |
| 0.48  | 2.88  | 1.31 | 1.57 | 1.25 |
| 0.89  | 0.83  | 0.92 | 0.93 | 1.06 |
| 1.04  | 0.12  | 0.82 | 0.55 | 0.88 |
| 0.75  | 1.85  | 0.61 | 0.98 | 0.63 |
| 1.19  | 1.29  | 0.75 | 0.95 | 1.04 |
| 1.48  | 0.63  | 1.23 | 0.72 | 1.19 |
| 0.72  | 0.53  | 1.19 | 1.04 | 0.9  |
| 0.64  | 0.73  | 0.84 | 0.75 | 0.56 |
| 2.14  | 0.41  | 1.06 | 1.13 | 0.87 |
| 2.35  | 0.74  | 0.51 | 1.28 | 1.28 |
| 1.21  | 1.29  | 1.1  | 0.99 | 0.48 |
| 0.95  | 1.03  | 1    | 1.08 | 0.81 |
| 3     | 0.68  | 0.84 | 0.89 | 0.6  |
| 3.78  | 1.3   | 1.15 | 0.66 | 1.28 |
| 0.99  | 1.08  | 1.25 | 1.43 | 0.97 |
| 2.66  | 4.58  | 0.92 | 1    | 1.15 |

|       |      |      |      |      |
|-------|------|------|------|------|
| 0.88  | 2.64 | 1.66 | 2.04 | 1.24 |
| 1.81  | 1.1  | 1.46 | 0.72 | 1.34 |
| 0.89  | 1.21 | 1.1  | 0.94 | 1.02 |
| 1.97  | 0.38 | 1.28 | 1.31 | 0.35 |
| 1.54  | 7.12 | 1.26 | 1.09 | 1    |
| 2.25  | 1.8  | 1.07 | 1.87 | 1    |
| 5.46  | 1.06 | 0.78 | 0.87 | 0.66 |
| 1.03  | 3.41 | 0.72 | 0.42 | 0.91 |
| 4.35  | 1.12 | 0.9  | 2.04 | 1.31 |
| 1.28  | 0.86 | 0.71 | 0.59 | 0.74 |
| 0.99  | 0.87 | 1.02 | 1.01 | 0.86 |
| 0.85  | 2.58 | 0.86 | 0.63 | 1.57 |
| 0.48  | 1.74 | 0.6  | 0.82 | 0.74 |
| 2.75  | 2.41 | 0.94 | 0.95 | 0.9  |
| 1.88  | 1.06 | 0.84 | 8.15 | 0.91 |
| 1.44  | 1.01 | 0.88 | 1.52 | 1.53 |
| 3.02  | 2.37 | 0.92 | 0.94 | 1.14 |
| 0.87  | 1.17 | 0.87 | 1.61 | 0.75 |
| 2.61  | 1.61 | 0.58 | 1.14 | 1.16 |
| 0.69  | 1.05 | 1.38 | 1.02 | 0.72 |
| 1.3   | 0.57 | 1.32 | 1.02 | 1    |
| 0.62  | 6.08 | 1.18 | 1.68 | 3.23 |
| 1.21  | 1.23 | 1.08 | 0.89 | 0.98 |
| 0.51  | 2.51 | 1.46 | 0.49 | 1.15 |
| 0.92  | 1.09 | 0.89 | 0.99 | 0.97 |
| 26.67 | 0.24 | 0.75 | 1.88 | 0.7  |
| 0.83  | 0.83 | 1.21 | 0.98 | 0.86 |
| 1.15  | 2    | 1.02 | 1.03 | 1.67 |
| 6.75  | 2.51 | 1.11 | 1.11 | 0.94 |
| 0.94  | 3.5  | 0.96 | 1.62 | 0.95 |
| 7.19  | 5.56 | 1.31 | 1.13 | 0.83 |
| 2     | 0.82 | 0.8  | 1.44 | 0.67 |
| 0.83  | 0.93 | 0.73 | 0.88 | 1    |



|      |      |      |       |      |
|------|------|------|-------|------|
| 1.19 | 1.24 | 0.56 | 1.33  | 1.05 |
| 0.33 | 1.69 | 1.47 | 0.87  | 2.1  |
| 0.48 | 1.18 | 0.79 | 1.33  | 1.05 |
| 0.55 | 0.81 | 0.57 | 0.49  | 0.62 |
| 2.78 | 1.66 | 0.97 | 1.15  | 1.15 |
| 4.25 | 2.77 | 0.93 | 0.72  | 0.63 |
| 0.28 | 0.21 | 0.9  | 0.64  | 0.68 |
| 2.23 | 1.41 | 1.07 | 2.23  | 0.89 |
| 1.19 | 1.99 | 2.12 | 2.13  | 1.35 |
| 1.83 | 0.48 | 0.72 | 0.95  | 0.74 |
| 0.93 | 1.15 | 0.88 | 1.13  | 0.71 |
| 0.5  | 0.81 | 1    | 1.03  | 0.95 |
| 1.04 | 1.11 | 0.5  | 1.04  | 1.3  |
| 0.66 | 3.2  | 1.24 | 2.88  | 1.16 |
| 1.85 | 0.61 | 0.8  | 1.14  | 0.81 |
| 3.31 | 0.71 | 1.17 | 1.03  | 0.84 |
| 1.48 | 0.86 | 1.38 | 1.05  | 1.37 |
| 0.62 | 1.32 | 0.86 | 1.8   | 0.72 |
| 0.61 | 2.16 | 0.77 | 4.09  | 0.57 |
| 2.04 | 0.11 | 0.57 | 0.68  | 0.47 |
| 1.5  | 0.85 | 1.57 | 1.6   | 0.92 |
| 3.48 | 0.65 | 0.78 | 0.77  | 0.75 |
| 0.18 | 1.7  | 1.03 | 1.04  | 0.86 |
| 1.16 | 0.3  | 0.86 | 0.9   | 0.84 |
| 1.94 | 1.17 | 0.9  | 1.04  | 1.07 |
| 3.48 | 1.58 | 0.9  | 1.38  | 0.85 |
| 0.87 | 1.05 | 1.39 | 0.23  | 0.99 |
| 3.1  | 1.82 | 1.1  | 1.6   | 2.37 |
| 1.03 | 2.42 | 0.97 | 1.15  | 0.81 |
| 0.27 | 3.65 | 0.25 | 1.3   | 0.28 |
| 0.69 | 4    | 1.09 | 1.87  | 1.26 |
| 1.06 | 0.77 | 1.08 | 31.07 | 0.89 |
| 2.52 | 2.25 | 4.51 | 1.11  | 0.48 |

|      |      |      |      |      |
|------|------|------|------|------|
| 1.09 | 0.76 | 1.17 | 1.13 | 0.99 |
| 0.81 | 0.93 | 1.19 | 0.9  | 1.36 |
| 2.3  | 5.5  | 1.59 | 1.49 | 0.89 |
| 4.54 | 0.12 | 0.51 | 0.21 | 0.77 |
| 3.14 | 0.64 | 0.71 | 1.05 | 0.87 |
| 1.12 | 3.68 | 0.76 | 1.78 | 0.89 |
| 3.31 | 1.97 | 1.08 | 0.85 | 0.91 |
| 0.44 | 0.7  | 0.98 | 1.21 | 0.98 |
| 2.89 | 2.04 | 1.04 | 1.69 | 0.81 |
| 0.23 | 1.6  | 1.47 | 1.02 | 1.16 |
| 0.64 | 0.2  | 1.17 | 0.86 | 1.13 |
| 0.08 | 4.72 | 0.13 | 0.19 | 3.75 |
| 1.83 | 0.59 | 1.05 | 0.13 | 0.99 |
| 0.33 | 5    | 1    | 1.63 | 0.06 |
